# Supplementary material for: Contribution of rare coding variants to complex trait heritability
Source: Research Square preprint supplement (doi:10.21203/rs.3.rs-2159360/v1), 2022-11-22
Supplement: Supplementary file 1 [file 75e1305c5ace9b29bf859434.xlsx]

## Sheet: Table 1
Supplementary Table 1: List of phenotypes, including 26 biomarkers and 5 anthropomorphic traits.
	TRAITS	ABBRIVIATIONS
1	Albumin	ALB
2	Alkaline phosphatase	ALP
3	Alanine aminotransferase	ALT
4	Apolipoprotein A	APOA1
5	Apolipoprotein B	APOB
6	Aspartate aminotransferase	AST
7	Calcium	CALC
8	Cholesterol	CHOL
9	Creatinine	CREA
10	C-reactive protein	CRP
11	Cystatin C	CYSC
12	Direct bilirubin	DBIL
13	Gamma glutamyl transferase	GGT
14	Glucose	GLU
15	Hemoglobin A1C	HBA1C
16	HDL cholesterol	HDL
17	Insulin-like growth factor 1	IGF-1
18	LDL direct	LDL
19	Lipoprotein (a)	LP-a
20	Phosphate	PHOS
21	Total bilirubin	TBIL
22	Total protein	TP
23	Triglycerides	TRIG
24	Urea	UREA
25	Urate	UA
26	Vitamin D	VITD
27	Height	Height
28	Waist to hip ratio	WTH
29	Systolic Blood Pressure	SBP
30	Diastolic Blood Pressure	DBP
31	Body mass index	BMI

## Sheet: Table 2
Supplementary Table 2: Medications used to correct biomarkers
Glucose lowering medication						Cholesterol lowering medications						Hypertension medications
Field 20003 code	ID	Field 6177 code	ID	Field 6153 code		Field 20003 code	ID	Field 6177 code	ID	Field 6153 code		Field 6177 code	ID	Field 6153 code
1140868902	acarbose	3	Insulin	3	Insulin	1141146234	atorvastatin	1	Cholesterol lowering medications	1	Cholesterol lowering medications	2	Blood pressure medication	2	Blood pressure medication
1140857584	acetohexamide					1141192414	crestor 10mg tablet
1141171652	actos 15mg tablet					1141192736	ezetimibe
1140868866	bromocriptine					1140888594	fluvastatin
1140874706	chlorpropamide					1141146138	lipitor 10mg tablet
1140874746	diamicron 80mg tablet					1140888648	pravastatin
1140866568	disopyramide					1141192410	rosuvastatin
1141157186	disopyramide product					1140861958	simvastatin
1140857518	eudemine 50mg tablet					1140881748	zocor 10mg tablet
1140874718	glibenclamide					1141200040	zocor heart-pro 10mg tablet
1140857494	glibornuride					1140864592	lescol 20mg capsule
1140874744	gliclazide
1141152590	glimepiride
1140874646	glipizide
1141157284	glipizide product
1140874658	gliquidone
1140874686	glucophage 500mg tablet
1140857500	glymidine
1140874754	guar gum
1140884600	metformin
1140869112	mifepristone
1141157302	mifepristone product
1140874652	minodiab 2.5mg tablet=glipizide
1141173882	nateglinide
1140884338	pentamidine
1141171646	pioglitazone
1140874420	quinine
1141168660	repaglinide
1141177600	rosiglitazone
1141189090	rosiglitazone 1mg / metformin 500mg tablet
1141173786	starlix 60mg tablet=nateglinide
1141182110	sulfadiazine
1140874664	tolazamide
1140874674	tolbutamide
1141153254	troglitazone

## Sheet: Table 3
Supplementary Table 3: Comparison of RV heritability estimates derived using gene-burden, gene-wise and exome-wide blocks
	Gene Burden			Gene-wise			Exome-wide			Comparison of RV heritability
TRAIT	h2RV-burden	LCL	UCL	h2RV-gene-tot	LCL	UCL	h2RV	LCL	UCL	Exome-wise vs Gene burden	Gene-wise vs Gene burden	Gene-wise vs Exome-wise
ALB	0.00991627	0.00702106	0.0128115	0.0553701	0.0258012	0.0849389	0.0542989	0.0257186	0.0828791	0.817376	0.820909	0.0193461
ALP	0.043771	0.0406351	0.046907	0.14262	0.112919	0.17232	0.138373	0.109682	0.167065	0.683674	0.693092	0.0297749
ALT	0.0161391	0.0131947	0.0190835	0.0795409	0.0499361	0.109146	0.077788	0.0491769	0.106399	0.792524	0.797097	0.0220372
APOA1	0.0129133	0.00999407	0.0158324	0.0472782	0.017722	0.0768344	0.0455843	0.0170163	0.0741522	0.716717	0.726866	0.0358293
APOB	0.0150919	0.0121556	0.0180282	0.0969959	0.0673635	0.126628	0.0958494	0.0672134	0.124486	0.842546	0.844407	0.0118193
AST	0.0101461	0.00724899	0.0130431	0.0556911	0.0261219	0.0852603	0.0586383	0.0300527	0.0872239	0.826972	0.817815	-0.0529204
CALC	0.00646591	0.00359903	0.00933279	0.0485007	0.0189424	0.0780591	0.0506464	0.0220709	0.0792218	0.872332	0.866684	-0.0442391
CHOL	0.0136956	0.0107703	0.016621	0.0740031	0.0444058	0.1036	0.0756017	0.0469929	0.104211	0.818845	0.814932	-0.0216018
CREA	0.0129761	0.0100564	0.0158958	0.0612438	0.0316658	0.0908217	0.0593389	0.0307517	0.087926	0.781322	0.788124	0.0311038
CRP	0.0142093	0.0112799	0.0171387	0.0713532	0.0417596	0.100947	0.0661927	0.0375963	0.0947891	0.785335	0.80086	0.0723232
CYSC	0.014415	0.011484	0.017346	0.0778184	0.048215	0.107422	0.0779074	0.0492948	0.10652	0.814973	0.814761	-0.00114363
DBIL	0.00995843	0.00706288	0.012854	0.0991544	0.0695183	0.128791	0.0849265	0.0563053	0.113548	0.882741	0.899566	0.143492
GGT	0.0100251	0.00712903	0.0129212	0.0750519	0.0454528	0.104651	0.0694822	0.0408817	0.0980828	0.855717	0.866424	0.0742108
GLU	0.00555979	0.00270048	0.0084191	0.0191842	-0.0103286	0.0486971	0.0181984	-0.010332	0.0467288	0.69449	0.71019	0.0513867
HBA1C	0.0104205	0.00752126	0.0133198	0.0959685	0.066338	0.125599	0.0953651	0.0667287	0.124001	0.89073	0.891417	0.00628744
HDL	0.0140197	0.0110918	0.0169476	0.067479	0.0378917	0.0970663	0.0655743	0.0369788	0.0941698	0.786202	0.792237	0.0282267
IGF1	0.0116007	0.00869194	0.0145095	0.080225	0.0506178	0.109832	0.0794463	0.0508316	0.108061	0.853981	0.855398	0.00970654
LDL	0.0138106	0.0108844	0.0167369	0.0865006	0.0568843	0.116117	0.0873956	0.0587708	0.11602	0.841976	0.840341	-0.0103469
LPa	0.012791	0.00987277	0.0157092	0.0427134	0.0131652	0.0722616	0.0408455	0.0122885	0.0694026	0.686845	0.700539	0.0437295
PHOS	0.0106589	0.0077577	0.0135601	0.0761597	0.046559	0.10576	0.0732523	0.0446459	0.101859	0.854491	0.860045	0.0381754
TBIL	0.0102508	0.00735291	0.0131487	0.0929753	0.0633488	0.122602	0.0769798	0.0483703	0.105589	0.866838	0.889747	0.17204
TP	0.00932694	0.00643652	0.0122174	0.0690382	0.0394483	0.0986281	0.0684939	0.0398942	0.0970935	0.863828	0.864902	0.00788447
TRIG	0.010783	0.00788082	0.0136852	0.083881	0.0542684	0.113493	0.0862806	0.0576566	0.114905	0.875024	0.871449	-0.0286079
UREA	0.00435142	0.00150229	0.00720055	0.0343399	0.00480374	0.0638761	0.0322477	0.00369792	0.0607975	0.865063	0.873284	0.0609264
UA	0.0191432	0.016176	0.0221105	0.0634103	0.0338295	0.0929911	0.0594807	0.0308943	0.0880672	0.678161	0.698105	0.0619699
VITD	0.0044368	0.00158695	0.00728665	0.0197989	-0.0097148	0.0493127	0.0197064	-0.00882618	0.0482391	0.774856	0.775907	0.00467203
SBP	0.00599679	0.00313383	0.00885976	0.066211	0.0366256	0.0957965	0.06782	0.0392212	0.0964189	0.911578	0.909429	-0.0243011
DBP	0.00727301	0.00439944	0.0101466	0.0871865	0.0575686	0.116804	0.085822	0.0571987	0.114445	0.915255	0.916581	0.0156495
BMI	0.00755369	0.0046778	0.0104296	0.0989536	0.0693173	0.12859	0.098823	0.0701819	0.127464	0.923563	0.923664	0.0013205
WTH	0.00500533	0.00215068	0.00785998	0.0736318	0.0440348	0.103229	0.0737208	0.0451143	0.102327	0.932104	0.932022	-0.00120845
HEIGHT	0.0247854	0.0217766	0.0277942	0.223055	0.193228	0.252881	0.21902	0.190214	0.247825	0.886835	0.888882	0.0180892

## Sheet: Table 4
Supplementary Table 4: Heritability estimates from twin or pedigree studies
Green highlight indicates recovery of pedigree/ twin based heritability estimates using RARity, as the estimates with RARity lies within the range of what has been historically reported in twin/ pedigree studies
Trait	Reference	Cohort	N	Heritability (%)	RARity h2tot (%) (95% CI)
Alanine aminotransferase	van Beek, J.H. et al. The genetic architecture of liver enzyme levels: GGT, ALT and AST. Behav Genet 43, 329-39 (2013)	NTR biobankstudy	Twins, their siblings, parents and spouses (N = 8,371; age range 18–90).	22 Females - 40 Males	23.0 (19.7,26.2)
Albumin	Loomba, R. et al. Heritability of Hepatic Fibrosis and Steatosis Based on a Prospective Twin Study. Gastroenterology 149, 1784-93 (2015).	Southern California	60 pairs of twins	45	22.5 (19.3,25.7)
Albumin	Whitfield, J.B. & Martin, N.G. The effects of inheritance on constituents of plasma: a twin study on some biochemical variables. Ann Clin Biochem 21 ( Pt 3), 176-83 (1984).	The Australian NH & MRC Twin Registry for a study of alcohol metabolism Twin Registry for a study of alcohol metabolism and susceptibility to intoxication	206 pairs of twins	73
Alkaline phosphatase	Whitfield, J.B. & Martin, N.G. Determinants of variation in plasma alkaline phosphatase activity: a twin study. Am J Hum Genet 35, 978-86 (1983).	Australian NH&MRC Twin Registry	204 pairs of twins	71-90	46.8 (43.6,50.1)
	Loomba, R. et al. Heritability of Hepatic Fibrosis and Steatosis Based on a Prospective Twin Study. Gastroenterology 149, 1784-93 (2015).	Southern California	60 pairs of twins	50
Apolipoprotein A	Heller, D.A., de Faire, U., Pedersen, N.L., Dahlén, G. & McClearn, G.E. Genetic and environmental influences on serum lipid levels in twins. N Engl J Med 328, 1150-6 (1993).	Swedish Twin Registry	302 pairs of twins	52	29.9 (26.6,33.1)
APOB	Heller, D.A., de Faire, U., Pedersen, N.L., Dahlén, G. & McClearn, G.E. Genetic and environmental influences on serum lipid levels in twins. N Engl J Med 328, 1150-6 (1993).	Swedish Twin Registry	302 pairs of twins	51	44.0 (40.8,47.3)
Aspartate aminotransferase	Loomba, R. et al. Heritability of Hepatic Fibrosis and Steatosis Based on a Prospective Twin Study. Gastroenterology 149, 1784-93 (2015).	Southern California	60 pairs of twins	54	24.0 (20.8,27.3)
Aspartate aminotransferase	van Beek, J.H. et al. The genetic architecture of liver enzyme levels: GGT, ALT and AST. Behav Genet 43, 329-39 (2013)	NTR biobankstudy	Twins, their siblings, parents and spouses (N= 8,371; age range 18–90)	43
Body mass index	Min, J., Chiu, D.T. & Wang, Y. Variation in the heritability of body mass index based on diverse twin studies: a systematic review. Obes Rev 14, 871-82 (2013).	32 studies from Finland (7), the United Kingdom (6), the United States (3), Denmark (3), China (3), Netherlands (2), South Korea (2), Sweden (2) and four from other countries	Vaious	31-90	39.5 (36.3,42.8)
C-reactive protein	Sas, A.A. et al. Genetic and environmental influences on stability and change in baseline levels of C-reactive protein: A longitudinal twin study. Atherosclerosis 265, 172-178 (2017).	Various	Various	10 - 65 from previous study, around 50 in this study	33.7 (30.5,37.0)
Calcium	Hunter, D.J. et al. Genetic contribution to renal function and electrolyte balance: a twin study. Clin Sci (Lond) 103, 259-65 (2002).		1747 adult female twin pairs: 539 monozygotic and 1208 dizygotic	33	20.7 (17.5,24.0)
Creatinine	Moulin, F. et al. A population-based approach to assess the heritability and distribution of renal handling of electrolytes. Kidney Int 92, 1536-1543 (2017).	Family-based cohort from Switzerland	273 pedigrees had mean size of 5.1_x0002_2.29 that included883 parent-offspring pairs, 424 sibling-sibling pairs, 75grandparent-grandchild pairs, 183 avuncular pairs (i.e., aunt/uncle-niece/nephew), 37 cousin pairs, and 10 half-siblingpairs.	21-39 from previous. 49 in this study	32.6 (29.3,35.8)
Cystatin C	Moulin, F. et al. A population-based approach to assess the heritability and distribution of renal handling of electrolytes. Kidney Int 92, 1536-1543 (2017).	Family-based cohort from Switzerland	273 pedigrees had mean size of 5.1_x0002_2.29 that included883 parent-offspring pairs, 424 sibling-sibling pairs, 75grandparent-grandchild pairs, 183 avuncular pairs (i.e., aunt/uncle-niece/nephew), 37 cousin pairs, and 10 half-siblingpairs.	50	38.9 (35.7,42.2)
Cystatin C	Arpegård, J. et al. Comparison of heritability of Cystatin C- and creatinine-based estimates of kidney function and their relation to heritability of cardiovascular disease. J Am Heart Assoc 4, e001467 (2015).	TwinGene, Swedish population	12 313 twins	40
Diastolic blood pressure	Fagard, R. et al. Heritability of conventional and ambulatory blood pressures. A study in twins. Hypertension 26, 919-24 (1995).	East Flanders Prospective Twin Study,	53 pairs of twins, males	31-51	34.6 (31.4,37.8)
Direct bilirubin	NA				4.4 (1.3,7.4)
Gamma glutamyl transferase	van Beek, J.H. et al. The genetic architecture of liver enzyme levels: GGT, ALT and AST. Behav Genet 43, 329-39 (2013)	NTR biobankstudy	twins, their siblings, parents and spouses (N= 8,371; age range 18–90)	30 Males, 60 Females	35.0 (31.7,38.2)
Glucose	Loomba, R. et al. Heritability of Hepatic Fibrosis and Steatosis Based on a Prospective Twin Study. Gastroenterology 149, 1784-93 (2015).	Southern California	60 pairs of twins	29	12.5 (9.3,15.7)
HDL-c	Liu, H. et al. Heritability and Genome-Wide Association Study of Plasma Cholesterol in Chinese Adult Twins. Front Endocrinol (Lausanne) 9, 677 (2018).	Various	Various	22-93	36.2 (32.9,39.4)
Height	Loomba, R. et al. Heritability of Hepatic Fibrosis and Steatosis Based on a Prospective Twin Study. Gastroenterology 149, 1784-93 (2015).	Southern California	60 pairs of twins	89	87.8 (84.5,91.1)
	Polderman, T.J. et al. Meta-analysis of the heritability of human traits based on fifty years of twin studies. Nat Genet 47, 702-9 (2015).			44-94
Hemoglobin A1C	Loomba, R. et al. Heritability of Hepatic Fibrosis and Steatosis Based on a Prospective Twin Study. Gastroenterology 149, 1784-93 (2015).	Southern California	60 pairs of twins	26	38.3 (35.1,41.6)
IGF-1	Jensen, R.B. et al. Genetic influence on the associations between IGF-I and glucose metabolism in a cohort of elderly twins. Eur J Endocrinol 178, 153-161 (2018).	Danish Twin Register	606 twins	65	33.8 (30.5,37.0)
LDL-c	Loomba, R. et al. Heritability of Hepatic Fibrosis and Steatosis Based on a Prospective Twin Study. Gastroenterology 149, 1784-93 (2015).	Southern California	60 pairs of twins	37	36.7 (33.5,39.9)
	Liu, H. et al. Heritability and Genome-Wide Association Study of Plasma Cholesterol in Chinese Adult Twins. Front Endocrinol (Lausanne) 9, 677 (2018).	Various	Various	22-91
Lipoprotein (a)	Boomsma, D.I., Kaptein, A., Kempen, H.J., Gevers Leuven, J.A. & Princen, H.M. Lipoprotein(a): relation to other risk factors and genetic heritability. Results from a Dutch parent-twin study. Atherosclerosis 99, 23-33 (1993).	Dutch	152 twin pairs	93-98	61.6 (58.4,64.8)
Phosphate	Hunter, D.J. et al. Genetic contribution to renal function and electrolyte balance: a twin study. Clin Sci (Lond) 103, 259-65 (2002).		1747 adult female twin pairs: 539 monozygotic and 1208 dizygotic	58	23.3 (20.1,26.6)
systolic pressure	Fagard, R. et al. Heritability of conventional and ambulatory blood pressures. A study in twins. Hypertension 26, 919-24 (1995).	East Flanders Prospective Twin Study,	53 pairs of twins, males	45-69	33.4 (30.2,36.7)
systolic pressure	Loomba, R. et al. Heritability of Hepatic Fibrosis and Steatosis Based on a Prospective Twin Study. Gastroenterology 149, 1784-93 (2015).	Southern California	60 pairs of twins	52
Triglycerides	Heller, D.A., de Faire, U., Pedersen, N.L., Dahlén, G. & McClearn, G.E. Genetic and environmental influences on serum lipid levels in twins. N Engl J Med 328, 1150-6 (1993).	Swedish Twin Registry	302 pairs of twins	28	31.9 (28.6,35.1)
Total bilirubin	Loomba, R. et al. Heritability of Hepatic Fibrosis and Steatosis Based on a Prospective Twin Study. Gastroenterology 149, 1784-93 (2015).	Southern California	60 pairs of twins	71	44.3 (41.1,47.6)
Total Cholesterole	Heller, D.A., de Faire, U., Pedersen, N.L., Dahlén, G. & McClearn, G.E. Genetic and environmental influences on serum lipid levels in twins. N Engl J Med 328, 1150-6 (1993).	Swedish Twin Registry	302 pairs of twins	32	32.2 (29.0,35.4)
	Liu, H. et al. Heritability and Genome-Wide Association Study of Plasma Cholesterol in Chinese Adult Twins. Front Endocrinol (Lausanne) 9, 677 (2018).	Various	Various	0-89
Total protein	NA				29.4 (26.1,32.6)
Urate	Misawa, K. et al. Contribution of Rare Variants of the SLC22A12 Gene to the Missing Heritability of Serum Urate Levels. Genetics 214, 1079-1090 (2020)	Varous	Various	30-70	32.5 (29.3,35.8)
Urea	Moulin, F. et al. A population-based approach to assess the heritability and distribution of renal handling of electrolytes. Kidney Int 92, 1536-1543 (2017)	Family-based cohort from Switzerland	273 pedigrees had mean size of 5.1_x0002_2.29 that included883 parent-offspring pairs, 424 sibling-sibling pairs, 75grandparent-grandchild pairs, 183 avuncular pairs (i.e., aunt/uncle-niece/nephew), 37 cousin pairs, and 10 half-siblingpairs.	49	20.0 (16.8,23.2)
Urea	Zhang, J., Thio, C.H.L., Gansevoort, R.T. & Snieder, H. Familial Aggregation of CKD and Heritability of Kidney Biomarkers in the General Population: The Lifelines Cohort Study. Am J Kidney Dis 77, 869-878 (2021).	Lifelines Cohort Study and Biobank, Netherlands	155,911 participants in Cross-sectional 3-generation family study.	31
Vitamin D	Choi, S., Ko, H., Lee, K., Sung, J. & Song, Y.M. Genetic influence on serum 25-hydroxyvitamin D concentration in Korean men: a cross-sectional study. Genes Nutr 13, 33 (2018).	Various	Various	23-80	15.0 (11.7,18.2)
Waist -to-hip ratio	Rose, K.M., Newman, B., Mayer-Davis, E.J. & Selby, J.V. Genetic and behavioral determinants of waist-hip ratio and waist circumference in women twins. Obes Res 6, 383-92 (1998).	Kaiser-Permanente Women Twins Study (1989 to 1990) , 31-90 yo	680 twins	36-61	28.2 (25.0,31.5)

## Sheet: Table 5
Supplementary Table 5: Genes contributing significantly to the rare coding variant heritability estimates of complex traits
Phenotype	Gene	RV heritability	P-value
ALB	ALB	0.00195994	7.93716e-47
ALB	FCGRT	0.00259846	7.67644e-75
ALB	TBC1D2B	0.000620478	2.04555e-07
ALP	ALDH5A1	0.000564595	7.94141e-09
ALP	ALPL	0.0283001	0
ALP	ASGR1	0.0029544	3.43522e-82
ALP	GBGT1	0.000740713	1.96932e-12
ALP	GPLD1	0.0122624	0
ALP	HSPG2	0.00394105	1.25799e-39
ALP	NBPF3	0.000557462	1.12108e-07
ALP	TDP2	0.000471316	9.73318e-09
ALP	TFAM	0.000316738	1.86195e-06
ALP	ZNF800	0.000433552	1.87656e-07
ALT	GPT	0.0222059	0
ALT	MFSD3	0.000412265	2.42728e-06
APOA1	ABCA1	0.00572304	2.18618e-124
APOA1	ADH1B	0.000467981	1.65106e-07
APOA1	ANGPTL3	0.000901473	1.95679e-17
APOA1	APOA1	0.00168696	4.06229e-46
APOA1	APOC3	0.000414669	1.97571e-10
APOA1	CETP	0.000891233	1.02783e-15
APOA1	LCAT	0.00120553	5.5128e-26
APOA1	LIPC	0.00180628	6.05859e-35
APOA1	LIPG	0.00175618	1.46744e-39
APOA1	LPL	0.000804258	6.18277e-15
APOA1	PLA2G12A	0.000746499	5.81486e-17
APOA1	SCARB1	0.000686381	3.51693e-10
APOB	APOB	0.0122156	3.70096e-250
APOB	APOE	0.000633634	1.22155e-11
APOB	BCAM	0.000775222	2.20623e-10
APOB	CEACAM20	0.000499053	4.40512e-08
APOB	CLASRP	0.000662859	1.19254e-08
APOB	LDLR	0.00374744	1.029e-88
APOB	NECTIN2	0.00148494	1.1533e-28
APOB	NKPD1	0.00202549	3.01799e-40
APOB	PCSK9	0.00386169	1.46275e-90
APOB	PPARA	0.00043638	3.103e-07
APOB	ZNF229	0.00142872	8.74682e-26
AST	ANO5	0.000693859	2.85757e-09
AST	GOT1	0.0106983	0
BMI	MC4R	0.000415551	7.24637e-07
CALC	ALB	0.000795299	1.24892e-14
CALC	CASR	0.00192929	2.67526e-46
CALC	FCGRT	0.000828054	5.88464e-19
CHOL	ABCA1	0.00187965	5.60148e-26
CHOL	ABCG5	0.000542059	1.18758e-06
CHOL	ANGPTL3	0.0012855	1.25135e-27
CHOL	APOB	0.00775514	1.09871e-131
CHOL	FGB	0.000458587	8.35744e-08
CHOL	JAK2	0.000731905	1.47766e-08
CHOL	KHDRBS2	0.000365836	1.71021e-06
CHOL	LDLR	0.00284212	4.94342e-62
CHOL	LIPG	0.00046062	5.99129e-07
CHOL	NECTIN2	0.00073566	4.12201e-11
CHOL	NKPD1	0.00101615	1.17049e-15
CHOL	PCSK9	0.00327148	4.3584e-73
CHOL	ZNF229	0.000596814	6.78125e-08
CREA	LRP2	0.00165915	2.956e-12
CREA	SLC22A2	0.00104251	6.86685e-17
CREA	SLC22A7	0.000468468	3.85696e-07
CRP	ABCA1	0.00080578	1.17658e-07
CRP	APCS	0.000368091	1.12369e-07
CRP	CRP	0.00451866	2.17166e-146
CRP	JAK1	0.000421473	2.62113e-06
CRP	TMED8	0.000377577	9.67818e-07
CYSC	CGNL1	0.000749764	1.74023e-07
CYSC	CST3	0.0064081	3.2247e-212
CYSC	SH2B3	0.000571243	6.04006e-07
DBIL	ATG16L1	0.000402962	1.99425e-06
DBIL	DGKD	0.000947207	1.10735e-11
DBIL	DNAJB3	0.000566616	1.49687e-11
DBIL	HJURP	0.000865092	4.60517e-12
DBIL	MROH2A	0.00419921	9.30919e-75
DBIL	NR1I2	0.000538289	7.5858e-08
DBIL	SAG	0.000666199	2.88631e-11
DBIL	SLCO1B1	0.00071781	3.58537e-10
DBIL	SLCO1B3	0.00203159	4.76856e-38
DBIL	SLCO1B3-SLCO1B7	0.00206087	1.3226e-36
DBIL	TRPM8	0.00105114	5.90566e-14
DBIL	UGT1A1	0.00227592	2.84595e-52
DBIL	UGT1A10	0.00196834	1.57934e-41
DBIL	UGT1A3	0.00255554	6.08868e-56
DBIL	UGT1A4	0.00235056	5.65907e-48
DBIL	UGT1A5	0.00285316	5.74735e-67
DBIL	UGT1A6	0.00175542	6.00227e-38
DBIL	UGT1A7	0.00246121	4.24323e-56
DBIL	UGT1A8	0.00153952	1.10547e-30
DBIL	UGT1A9	0.00249408	6.95162e-57
DBIL	USP40	0.00128468	1.19886e-16
GGT	A1CF	0.000461216	6.4214e-08
GGT	GGT1	0.00782164	5.54965e-223
GGT	LRRC75B	0.0017459	9.04595e-40
GGT	RORC	0.000432442	7.25816e-08
GGT	SYNJ2	0.000837525	1.58831e-07
GLU	G6PC2	0.00201579	2.53858e-49
GLU	GCK	0.000830192	3.62758e-20
HBA1C	ADGRE5	0.000530157	2.31188e-06
HBA1C	APEH	0.000405349	1.44725e-06
HBA1C	CTU2	0.000997208	2.92237e-12
HBA1C	G6PC2	0.00113371	9.5355e-24
HBA1C	GCK	0.00122783	2.82351e-32
HBA1C	JAK2	0.000610833	9.98136e-07
HBA1C	PFKL	0.00073362	3.71347e-08
HBA1C	PFKM	0.00070112	2.26699e-10
HBA1C	PIEZO1	0.0084832	5.10543e-125
HBA1C	RHAG	0.000604942	6.43547e-12
HBA1C	SPTB	0.000956908	5.25523e-07
HBA1C	TMC8	0.00110946	1.12658e-17
HBA1C	TMEM43	0.000447151	2.55698e-06
HDL	ABCA1	0.00492134	1.31752e-101
HDL	APOA1	0.00109215	1.9742e-27
HDL	APOA5	0.000362405	5.45392e-07
HDL	APOC3	0.000554178	1.54714e-14
HDL	CETP	0.00167232	4.55971e-36
HDL	LCAT	0.00145985	3.52849e-33
HDL	LIPC	0.00129797	2.82479e-22
HDL	LIPG	0.0013762	7.18426e-29
HDL	LPL	0.00111831	5.97293e-23
HDL	NR1H3	0.000426256	1.15473e-07
HDL	PLA2G12A	0.00048009	7.05747e-10
HDL	SCARB1	0.00121894	4.5472e-22
HEIGHT	CRISPLD2	0.000631702	3.77844e-08
HEIGHT	DDR2	0.000488549	6.13044e-07
HEIGHT	FGF2	0.000361456	9.15465e-07
HEIGHT	FGFR3	0.00121827	1.83078e-15
HEIGHT	GH1	0.000408888	4.14381e-07
HEIGHT	GHRH	0.000309918	2.10705e-07
HEIGHT	GRAMD2A	0.000458959	5.31489e-09
HEIGHT	HAPLN3	0.000628418	2.25208e-08
HEIGHT	IHH	0.000444396	1.45054e-07
HEIGHT	NPR2	0.000633108	1.43667e-08
HEIGHT	NPR3	0.000612041	7.46833e-10
HEIGHT	SCMH1	0.000593793	4.21364e-09
HEIGHT	STC2	0.000430815	5.75516e-08
HEIGHT	ZFAT	0.00139152	7.89516e-19
IGF1	GH1	0.00197501	5.93024e-51
IGF1	IGFALS	0.00388008	1.15715e-82
IGF1	IGFBP3	0.000528902	4.64838e-12
IGF1	PARPBP	0.000642155	6.24028e-09
IGF1	ZNF12	0.00038309	2.03003e-06
LDL	ABCG5	0.000602534	1.25778e-07
LDL	ANGPTL3	0.000782478	1.68904e-14
LDL	APOB	0.0102334	1.19156e-195
LDL	APOE	0.000397709	1.63905e-06
LDL	LDLR	0.0039042	1.82166e-93
LDL	NECTIN2	0.000985356	1.78091e-16
LDL	NKPD1	0.00131448	2.49226e-22
LDL	PCSK9	0.00417872	3.72018e-100
LDL	ZNF229	0.000970728	3.43111e-15
LPa	ACAT2	0.000352742	1.88733e-06
LPa	AGPAT4	0.00120994	2.11805e-29
LPa	ARID1B	0.000991461	4.25205e-07
LPa	EZR	0.000563956	1.20883e-07
LPa	FNDC1	0.00200969	3.01729e-24
LPa	IGF2R	0.00589602	1.92083e-109
LPa	LPA	0.0129879	0
LPa	MAP3K4	0.00330399	1.51174e-65
LPa	MAS1	0.000823227	4.00127e-15
LPa	MRPL18	0.00103624	8.9593e-27
LPa	PLG	0.0090378	4.01344e-260
LPa	PNLDC1	0.000932591	5.95557e-15
LPa	SLC22A1	0.00159097	1.02146e-28
LPa	SLC22A2	0.00430177	2.23241e-109
LPa	SLC22A3	0.00138962	2.10287e-25
LPa	SOD2	0.000457062	5.08955e-10
LPa	SYNJ2	0.00103282	4.20866e-10
LPa	SYTL3	0.000593755	5.00592e-07
LPa	TMEM181	0.000603434	3.72635e-08
LPa	TULP4	0.00101854	1.27502e-09
LPa	WTAP	0.00152343	2.12883e-41
PHOS	ALPL	0.00295109	4.70811e-73
PHOS	CDR2	0.000371736	1.28579e-06
PHOS	ENPP1	0.000517761	1.07626e-06
PHOS	HLA-DPA1	0.000296294	1.86175e-06
PHOS	TTK	0.00121973	2.30679e-21
TBIL	ATG16L1	0.000641953	1.62546e-11
TBIL	DGKD	0.00122579	7.84477e-17
TBIL	DNAJB3	0.00070513	3.71533e-15
TBIL	HJURP	0.00100361	8.27319e-15
TBIL	MROH2A	0.00522132	2.08836e-101
TBIL	NR1I2	0.000475577	1.04083e-06
TBIL	SAG	0.000921241	3.11175e-17
TBIL	SLCO1B1	0.000572714	1.50052e-07
TBIL	SLCO1B3	0.00140551	7.51084e-23
TBIL	SLCO1B3-SLCO1B7	0.00147453	6.98814e-23
TBIL	TRPM8	0.00143722	9.66876e-22
TBIL	UGT1A1	0.00274407	2.78542e-66
TBIL	UGT1A10	0.00233242	7.74796e-52
TBIL	UGT1A3	0.00316869	6.86735e-74
TBIL	UGT1A4	0.00291756	7.22015e-64
TBIL	UGT1A5	0.00337896	6.1629e-83
TBIL	UGT1A6	0.0022945	1.4788e-53
TBIL	UGT1A7	0.00319461	3.85546e-78
TBIL	UGT1A8	0.00180861	5.75892e-38
TBIL	UGT1A9	0.00311001	2.45122e-75
TBIL	USP40	0.00166871	2.77646e-24
TP	FCGR2B	0.00056055	8.08247e-12
TP	FCGRT	0.00203825	2.23998e-56
TP	SNX8	0.000718048	1.73381e-11
TP	TNFRSF13B	0.00121553	7.67867e-26
TRIG	ANGPTL3	0.00114976	6.40223e-24
TRIG	APOA5	0.0009839	1.27605e-23
TRIG	APOB	0.0028068	5.86166e-28
TRIG	APOC3	0.00135949	1.69561e-40
TRIG	LPL	0.000866317	1.86395e-16
TRIG	PLA2G12A	0.000517029	8.26962e-11
TRIG	SIK3	0.000634182	5.65071e-07
TRIG	ZPR1	0.000821457	7.82672e-16
UA	LGALS13	0.000316964	7.14108e-07
UA	PDZK1	0.000630198	1.76954e-11
UA	SLC22A11	0.000678923	5.03788e-11
UA	SLC22A12	0.012337	0
UA	SLC2A9	0.00400956	1.09358e-100
UA	WDR1	0.000459708	3.36217e-07
UREA	RBM47	0.000584871	2.04022e-08
VITD	CYP2R1	0.000532949	1.47542e-08
VITD	HAL	0.000652949	1.17073e-08
VITD	PDE3B	0.000644365	3.23992e-07

## Sheet: Table 6
Supplementary table 6: Association between the genes contributing significantly to RV heritability and diseases based on DisGeNET
disease_type	gene_pli	el	disease_class_name	ei	protein_class_name	gene_symbol	source	geneid	protein_class	year_final	gene_dpi	diseaseid	uniprotid	disease_semantic_type	disease_name	disease_class	score	year_initial	gene_dsi
disease	1.4525e-13		Congenital, Hereditary, and Neonatal Diseases and Abnormalities; Nutritional and Metabolic Diseases; Nervous System Diseases	0.991	Transporter	ABCA1	CURATED	19	DTO_05007405	2019	0.846	C0039292	O95477	Disease or Syndrome	Tangier Disease	C16;C18;C10	1	1999	0.467
disease	0.0003636		Congenital, Hereditary, and Neonatal Diseases and Abnormalities; Nutritional and Metabolic Diseases	1	Enzyme	ALPL	CURATED	249	DTO_05007624	2019	0.769	C0268412	P05186	Disease or Syndrome	Infantile hypophosphatasia	C16;C18	1	1987	0.546
disease	0.046698		Nutritional and Metabolic Diseases	0.993	G-protein coupled receptor	CASR	CURATED	846	DTO_02300001	2020	0.846	C0342637	P41180	Disease or Syndrome	Hypocalciuric hypercalcemia, familial, type 1	C18	1	1976	0.41
disease	1.6432e-05	definitive	Congenital, Hereditary, and Neonatal Diseases and Abnormalities; Musculoskeletal Diseases	0.974	Kinase	FGFR3	CURATED	2261	DTO_03300101	2020	0.846	C0001080	P22607	Congenital Abnormality	Achondroplasia	C16;C05	1	1994	0.391
disease	1.6432e-05		Congenital, Hereditary, and Neonatal Diseases and Abnormalities; Musculoskeletal Diseases	1	Kinase	FGFR3	CURATED	2261	DTO_03300101	2019	0.846	C1864436	P22607	Disease or Syndrome	Muenke Syndrome	C16;C05	1	1994	0.391
disease	0.63464	strong	Nutritional and Metabolic Diseases; Endocrine System Diseases	1	Kinase	GCK	CURATED	2645	DTO_03300101	2019	0.808	C0342277	P35557	Disease or Syndrome	Diabetes mellitus autosomal dominant type II (disorder)	C18;C19	1	1992	0.523
disease	0.65372		Hemic and Lymphatic Diseases	0.968	Kinase	JAK2	CURATED	3717	DTO_03300101	2020	0.885	C0001815	O60674	Neoplastic Process	Primary Myelofibrosis	C15	1	2005	0.385
disease	0.65372		Neoplasms; Hemic and Lymphatic Diseases	0.975	Kinase	JAK2	CURATED	3717	DTO_03300101	2020	0.885	C0032463	O60674	Neoplastic Process	Polycythemia Vera	C04;C15	1	2005	0.385
disease	0.08102		Congenital, Hereditary, and Neonatal Diseases and Abnormalities; Nutritional and Metabolic Diseases	0.974	Enzyme	LCAT	CURATED	3931	DTO_05007624	2019	0.654	C0023195	P04180	Disease or Syndrome	Lecithin Acyltransferase Deficiency	C16;C18	1	1967	0.588
disease	1.2712e-09	strong	Congenital, Hereditary, and Neonatal Diseases and Abnormalities; Nutritional and Metabolic Diseases	0.993	Enzyme	LPL	CURATED	4023	DTO_05007624	2019	0.808	C0023817	P06858	Disease or Syndrome	Hyperlipoproteinemia Type I	C16;C18	1	1977	0.474
disease	0.00091697		Pathological Conditions, Signs and Symptoms; Nutritional and Metabolic Diseases	0.961	G-protein coupled receptor	MC4R	CURATED	4160	DTO_02300001	2020	0.692	C0028754	P32245	Disease or Syndrome	Obesity	C23;C18	1	1997	0.535
disease	3.2577e-06		Congenital, Hereditary, and Neonatal Diseases and Abnormalities; Nutritional and Metabolic Diseases	0.984		UGT1A1	CURATED	54658		2019	0.769	C0010324	P22309	Disease or Syndrome	Crigler Najjar syndrome, type 1	C16;C18	1	1992	0.464
disease	1	definitive	Pathological Conditions, Signs and Symptoms; Congenital, Hereditary, and Neonatal Diseases and Abnormalities; Musculoskeletal Diseases; Nervous System Diseases; Mental Disorders; Stomatognathic Diseases; Behavior and Behavior Mechanisms	1		ARID1B	CURATED	57492		2020	0.846	C0265338	Q8NFD5	Disease or Syndrome	Coffin-Siris syndrome	C23;C16;C05;C10;F03;C07;F01	1	2012	0.503
disease	0.31397		Congenital, Hereditary, and Neonatal Diseases and Abnormalities; Musculoskeletal Diseases	0.9		IHH	CURATED	3549		2019	0.538	C1862151	Q14623	Disease or Syndrome	BRACHYDACTYLY, TYPE A1 (disorder)	C16;C05	0.96	2001	0.573
disease	0.99999	strong	Pathological Conditions, Signs and Symptoms; Congenital, Hereditary, and Neonatal Diseases and Abnormalities; Nutritional and Metabolic Diseases; Female Urogenital Diseases and Pregnancy Complications; Eye Diseases; Male Urogenital Diseases; Nervous System Diseases; Otorhinolaryngologic Diseases	1		LRP2	CURATED	4036		2018	0.846	C1857277	P98164	Disease or Syndrome	Donnai-Barrow syndrome	C23;C16;C18;C13;C11;C12;C10;C09	0.96	2003	0.491
disease	0.0003636		Congenital, Hereditary, and Neonatal Diseases and Abnormalities; Nutritional and Metabolic Diseases	0.975	Enzyme	ALPL	CURATED	249	DTO_05007624	2019	0.769	C0268413	P05186	Disease or Syndrome	Adult hypophosphatasia (disorder)	C16;C18	0.95	1988	0.546
disease	4.2042e-05		Musculoskeletal Diseases	1	Kinase	NPR2	CURATED	4882	DTO_03300101	2019	0.615	C1864356	P20594	Disease or Syndrome	ACROMESOMELIC DYSPLASIA, MAROTEAUX TYPE	C05	0.95	2004	0.573
disease	3.7625e-18		Congenital, Hereditary, and Neonatal Diseases and Abnormalities; Nutritional and Metabolic Diseases; Musculoskeletal Diseases; Nervous System Diseases	1	Kinase	PFKM	CURATED	5213	DTO_03300101	2016	0.5	C0017926	P08237	Disease or Syndrome	Glycogen Storage Disease Type VII	C16;C18;C05;C10	0.94	1990	0.666
disease	0.0003636		Congenital, Hereditary, and Neonatal Diseases and Abnormalities; Nutritional and Metabolic Diseases	1	Enzyme	ALPL	CURATED	249	DTO_05007624	2019	0.769	C0220743	P05186	Disease or Syndrome; Congenital Abnormality	Childhood hypophosphatasia (disorder)	C16;C18	0.93	1992	0.546
disease	1.0376e-19		Congenital, Hereditary, and Neonatal Diseases and Abnormalities; Musculoskeletal Diseases	1	Enzyme modulator	HSPG2	CURATED	3339	DTO_05007584	2018	0.885	C4551479	P98160	Disease or Syndrome	Schwartz-Jampel Syndrome, Type 1	C16;C05	0.93	1999	0.438
disease	0.046698	strong		1	G-protein coupled receptor	CASR	CURATED	846	DTO_02300001	2019	0.846	C3715128	P41180	Disease or Syndrome	HYPOCALCEMIA, AUTOSOMAL DOMINANT 1		0.92	1994	0.41
disease	2.8542e-22		Congenital, Hereditary, and Neonatal Diseases and Abnormalities; Musculoskeletal Diseases; Nervous System Diseases	1		ANO5	CURATED	203859		2017	0.538	C1969785	Q75V66	Disease or Syndrome	MUSCULAR DYSTROPHY, LIMB-GIRDLE, TYPE 2L (disorder)	C16;C05;C10	0.92	2010	0.619
disease	4.5964e-29		Nervous System Diseases	1	Ion channel	TRPM8	CURATED	79054	DTO_01300327	2011	0.808	C0270858	Q7Z2W7	Disease or Syndrome	Abdominal Migraine	C10	0.3	2011	0.553
disease	0.45637		Skin and Connective Tissue Diseases; Immune System Diseases	0.98	Cell adhesion	FCGR2B	CURATED	2213	DTO_05007620	2019	0.846	C0024141	P31994	Disease or Syndrome	Lupus Erythematosus, Systemic	C17;C20	0.9	1995	0.522
disease	0.63464	strong	Nutritional and Metabolic Diseases; Endocrine System Diseases	0.953	Kinase	GCK	CURATED	2645	DTO_03300101	2020	0.808	C0011860	P35557	Disease or Syndrome	Diabetes Mellitus, Non-Insulin-Dependent	C18;C19	0.9	1992	0.523
disease	9.841e-24	strong	Nutritional and Metabolic Diseases	0.977		LDLR	CURATED	3949		2020	0.885	C0020443	P01130	Disease or Syndrome	Hypercholesterolemia	C18	0.9	1982	0.449
disease	9.841e-24	strong	Congenital, Hereditary, and Neonatal Diseases and Abnormalities; Nutritional and Metabolic Diseases	0.982		LDLR	CURATED	3949		2020	0.885	C0020445	P01130	Disease or Syndrome	Hypercholesterolemia, Familial	C16;C18	0.9	1964	0.449
disease	1.0376e-19	strong	Congenital, Hereditary, and Neonatal Diseases and Abnormalities; Musculoskeletal Diseases	1	Enzyme modulator	HSPG2	CURATED	3339	DTO_05007584	2020	0.885	C0036391	P98160	Disease or Syndrome	Schwartz-Jampel Syndrome	C16;C05	0.88	1999	0.438
disease	1.0376e-19		Congenital, Hereditary, and Neonatal Diseases and Abnormalities; Musculoskeletal Diseases; Endocrine System Diseases	1	Enzyme modulator	HSPG2	CURATED	3339	DTO_05007584	2018	0.885	C1857100	P98160	Disease or Syndrome	Dyssegmental dysplasia	C16;C05;C19	0.83	1999	0.438
disease	1.4525e-13	limited	Congenital, Hereditary, and Neonatal Diseases and Abnormalities; Nutritional and Metabolic Diseases	0.972	Transporter	ABCA1	CURATED	19	DTO_05007405	2017	0.846	C1704429	O95477	Disease or Syndrome	Hypoalphalipoproteinemia, Familial	C16;C18	0.8	1999	0.467
disease	0.64329	strong	Congenital, Hereditary, and Neonatal Diseases and Abnormalities; Endocrine System Diseases	0.941	Transporter	ALB	CURATED	213	DTO_05007405	2019	0.962	C0342185	P02768	Disease or Syndrome	Hyperthyroxinemia, Familial Dysalbuminemic	C16;C19	0.8	1986	0.317
disease	1.9234e-16	strong	Nutritional and Metabolic Diseases	1		APOB	CURATED	338		2018	0.808	C4551990	P04114	Disease or Syndrome	Acanthocytosis With Hypobetalipoproteinemia	C18	0.71	1989	0.453
disease	0.0018685	strong	Congenital, Hereditary, and Neonatal Diseases and Abnormalities; Nutritional and Metabolic Diseases	0.977		APOE	CURATED	348		2020	0.962	C0020479	P02649	Disease or Syndrome	Hyperlipoproteinemia Type III	C16;C18	0.8	1977	0.338
disease	0.0018685	strong	Nervous System Diseases; Mental Disorders	0.96		APOE	CURATED	348		2017	0.962	C1863051	P02649	Disease or Syndrome	ALZHEIMER DISEASE 2	C10;F03	0.8	1985	0.338
disease	0.0018685	strong	Female Urogenital Diseases and Pregnancy Complications; Male Urogenital Diseases	0.95		APOE	CURATED	348		2020	0.962	C2673196	P02649	Disease or Syndrome	LIPOPROTEIN GLOMERULOPATHY	C13;C12	0.8	1997	0.338
disease	0.046698	strong	Congenital, Hereditary, and Neonatal Diseases and Abnormalities; Endocrine System Diseases	0.962	G-protein coupled receptor	CASR	CURATED	846	DTO_02300001	2020	0.846	C1832615	P41180	Disease or Syndrome	HYPERPARATHYROIDISM, NEONATAL SEVERE	C16;C19	0.8	1995	0.41
disease	1.1892e-23	limited		0.933		CETP	CURATED	1071		2018	0.731	C3149462	P11597	Disease or Syndrome	HYPERALPHALIPOPROTEINEMIA 1		0.8	1990	0.512
disease	1.6432e-05		Neoplasms; Female Urogenital Diseases and Pregnancy Complications; Male Urogenital Diseases	0.979	Kinase	FGFR3	CURATED	2261	DTO_03300101	2019	0.846	C0005684	P22607	Neoplastic Process	Malignant neoplasm of urinary bladder	C04;C13;C12	0.8	1999	0.391
disease	1.6432e-05		Congenital, Hereditary, and Neonatal Diseases and Abnormalities; Musculoskeletal Diseases; Endocrine System Diseases	0.972	Kinase	FGFR3	CURATED	2261	DTO_03300101	2020	0.846	C0410529	P22607	Congenital Abnormality	Hypochondroplasia (disorder)	C16;C05;C19	0.8	1995	0.391
disease	1.6432e-05	strong	Congenital, Hereditary, and Neonatal Diseases and Abnormalities; Musculoskeletal Diseases	0.941	Kinase	FGFR3	CURATED	2261	DTO_03300101	2018	0.846	C1300257	P22607	Disease or Syndrome	Thanatophoric dysplasia, type 2	C16;C05	0.8	1995	0.391
disease	1.6432e-05		Congenital, Hereditary, and Neonatal Diseases and Abnormalities; Musculoskeletal Diseases	1	Kinase	FGFR3	CURATED	2261	DTO_03300101	2019	0.846	C1868678	P22607	Disease or Syndrome	THANATOPHORIC DYSPLASIA, TYPE I (disorder)	C16;C05	0.8	1994	0.391
disease	1.6432e-05		Congenital, Hereditary, and Neonatal Diseases and Abnormalities; Musculoskeletal Diseases	1	Kinase	FGFR3	CURATED	2261	DTO_03300101	2018	0.846	C2674173	P22607	Congenital Abnormality	Achondroplasia, Severe, With Developmental Delay And Acanthosis Nigricans	C16;C05	0.8	1996	0.391
disease	0.63464	strong	Nutritional and Metabolic Diseases; Endocrine System Diseases	1	Kinase	GCK	CURATED	2645	DTO_03300101	2019	0.808	C1833104	P35557	Disease or Syndrome	DIABETES MELLITUS, PERMANENT NEONATAL	C18;C19	0.8	2001	0.523
disease	0.65372		Neoplasms	0.945	Kinase	JAK2	CURATED	3717	DTO_03300101	2019	0.885	C0023467	O60674	Neoplastic Process	Leukemia, Myelocytic, Acute	C04	0.8	2005	0.385
disease	0.65372		Hemic and Lymphatic Diseases	0.984	Kinase	JAK2	CURATED	3717	DTO_03300101	2020	0.885	C0040028	O60674	Disease or Syndrome	Thrombocythemia, Essential	C15	0.8	2005	0.385
disease	0.08102	strong	Congenital, Hereditary, and Neonatal Diseases and Abnormalities; Nutritional and Metabolic Diseases	1	Enzyme	LCAT	CURATED	3931	DTO_05007624	2019	0.654	C0342895	P04180	Disease or Syndrome	Fish-Eye Disease	C16;C18	0.8	1987	0.588
disease	9.841e-24	strong	Congenital, Hereditary, and Neonatal Diseases and Abnormalities; Nutritional and Metabolic Diseases	0.977		LDLR	CURATED	3949		2020	0.885	C0745103	P01130	Disease or Syndrome	Hyperlipoproteinemia Type IIa	C16;C18	0.8	1975	0.449
disease	1.2712e-09	strong	Congenital, Hereditary, and Neonatal Diseases and Abnormalities; Nutritional and Metabolic Diseases	1	Enzyme	LPL	CURATED	4023	DTO_05007624	2020	0.808	C0020474	P06858	Disease or Syndrome	Hyperlipidemia, Familial Combined	C16;C18	0.8	1987	0.474
disease	0.010345	definitive	Congenital, Hereditary, and Neonatal Diseases and Abnormalities; Eye Diseases; Skin and Connective Tissue Diseases	1	Enzyme	PLG	CURATED	5340	DTO_05007624	2019	0.923	C1968804	P00747	Disease or Syndrome	Plasminogen Deficiency, Type I	C16;C11;C17	0.8	1982	0.389
disease	3.0504e-07	strong	Congenital, Hereditary, and Neonatal Diseases and Abnormalities; Nutritional and Metabolic Diseases; Mental Disorders	1	Enzyme	ALDH5A1	CURATED	7915	DTO_05007624	2019	0.462	C0268631	P51649	Disease or Syndrome	succinic semialdehyde dehydrogenase deficiency	C16;C18;F03	0.8	2000	0.619
disease	3.2577e-06	strong	Congenital, Hereditary, and Neonatal Diseases and Abnormalities; Nutritional and Metabolic Diseases	1		UGT1A1	CURATED	54658		2020	0.769	C0017551	P22309	Disease or Syndrome	Gilbert Disease (disorder)	C16;C18	0.8	1995	0.464
disease	3.2577e-06	strong	Congenital, Hereditary, and Neonatal Diseases and Abnormalities; Nutritional and Metabolic Diseases	1		UGT1A1	CURATED	54658		2018	0.769	C2931132	P22309	Disease or Syndrome	Crigler Najjar syndrome, type 2	C16;C18	0.8	1993	0.464
disease	3.081e-21		Congenital, Hereditary, and Neonatal Diseases and Abnormalities; Digestive System Diseases; Nutritional and Metabolic Diseases	0.976	Transporter	ABCG5	CURATED	64240	DTO_05007405	2020	0.577	C0342907	Q9H222	Congenital Abnormality	Sitosterolemia	C16;C06;C18	0.8	2000	0.592
disease	1.6891e-13		Pathological Conditions, Signs and Symptoms; Congenital, Hereditary, and Neonatal Diseases and Abnormalities; Nutritional and Metabolic Diseases; Female Urogenital Diseases and Pregnancy Complications; Male Urogenital Diseases	0.971	Transporter	SLC22A12	CURATED	116085	DTO_05007405	2019	0.538	C0473219	Q96S37	Disease or Syndrome	Renal hypouricemia	C23;C16;C18;C13;C12	0.8	2002	0.647
disease	2.8542e-22		Congenital, Hereditary, and Neonatal Diseases and Abnormalities; Skin and Connective Tissue Diseases; Musculoskeletal Diseases	1		ANO5	CURATED	203859		2019	0.538	C1833736	Q75V66	Disease or Syndrome	Osteogenesis imperfecta, Levin type	C16;C17;C05	0.8	2004	0.619
disease	1.6432e-05		Congenital, Hereditary, and Neonatal Diseases and Abnormalities; Skin and Connective Tissue Diseases; Musculoskeletal Diseases	1	Kinase	FGFR3	CURATED	2261	DTO_03300101	2018	0.846	C2677099	P22607	Disease or Syndrome	CROUZON SYNDROME WITH ACANTHOSIS NIGRICANS (disorder)	C16;C17;C05	0.78	1994	0.391
disease	0.0039011		Congenital, Hereditary, and Neonatal Diseases and Abnormalities; Nutritional and Metabolic Diseases; Nervous System Diseases; Cardiovascular Diseases	1		CST3	CURATED	1471		2013	0.808	C1527338	P01034	Disease or Syndrome	Hereditary Cerebral Amyloid Angiopathy, Icelandic Type	C16;C18;C10;C14	0.77	1987	0.436
disease	0.56616	strong	Congenital, Hereditary, and Neonatal Diseases and Abnormalities; Hemic and Lymphatic Diseases	1	Signaling	FGB	CURATED	2244	DTO_05007599	2017	0.692	C2584774	P02675	Disease or Syndrome	Congenital hypofibrinogenemia	C16;C15	0.76	2000	0.584
disease	0.030057	strong	Musculoskeletal Diseases; Nervous System Diseases; Endocrine System Diseases	1	Signaling	GH1	CURATED	2688	DTO_05007599	2019	0.923	C0271567	P01241	Disease or Syndrome	Isolated Growth Hormone Deficiency, Type II	C05;C10;C19	0.75	1996	0.373
disease	1	strong	Congenital, Hereditary, and Neonatal Diseases and Abnormalities; Hemic and Lymphatic Diseases	1		SPTB	CURATED	6710		2016	0.462	C0013902	P11277	Disease or Syndrome	Elliptocytosis, Hereditary	C16;C15	0.75	1990	0.65
disease	3.4212e-10	strong	Congenital, Hereditary, and Neonatal Diseases and Abnormalities; Nutritional and Metabolic Diseases; Musculoskeletal Diseases	1		POR	CURATED	5447		2018	0.769	C1860042	P16435	Disease or Syndrome	Antley-Bixler Syndrome with Disordered Steroidogenesis	C16;C18;C05	0.74	2004	0.502
disease	2.8542e-22		Pathological Conditions, Signs and Symptoms; Congenital, Hereditary, and Neonatal Diseases and Abnormalities; Musculoskeletal Diseases; Nervous System Diseases	1		ANO5	CURATED	203859		2019	0.538	C2750076	Q75V66	Disease or Syndrome	Miyoshi Muscular Dystrophy 3	C23;C16;C05;C10	0.74	2010	0.619
phenotype	2.4971e-23		Congenital, Hereditary, and Neonatal Diseases and Abnormalities; Nutritional and Metabolic Diseases	1		HAL	CURATED	3034		2005	0.538	C0220992	P42357	Disease or Syndrome	Histidinemia	C16;C18	0.73	1991	0.641
disease	0.5503	strong	Congenital, Hereditary, and Neonatal Diseases and Abnormalities; Musculoskeletal Diseases; Endocrine System Diseases	1	Kinase	DDR2	CURATED	4921	DTO_03300101	2018	0.769	C1849011	Q16832	Disease or Syndrome	SPONDYLOMETAEPIPHYSEAL DYSPLASIA, SHORT LIMB-HAND TYPE	C16;C05;C19	0.73	1993	0.541
disease	1.1086e-21	limited	Congenital, Hereditary, and Neonatal Diseases and Abnormalities; Nutritional and Metabolic Diseases	1	Transporter	SLCO1B1	CURATED	10599	DTO_05007405	2015	0.731	C0220991	Q9Y6L6	Disease or Syndrome	Rotor Syndrome	C16;C18	0.73	2007	0.538
disease	3.793e-10		Congenital, Hereditary, and Neonatal Diseases and Abnormalities; Nutritional and Metabolic Diseases; Female Urogenital Diseases and Pregnancy Complications; Musculoskeletal Diseases; Male Urogenital Diseases	1		CYP2R1	CURATED	120227		2017	0.731	C1838657	Q6VVX0	Disease or Syndrome	Vitamin D Hydroxylation-Deficient Rickets, Type 1B	C16;C18;C13;C05;C12	0.73	2004	0.563
disease	1.6432e-05		Pathological Conditions, Signs and Symptoms; Congenital, Hereditary, and Neonatal Diseases and Abnormalities; Eye Diseases; Musculoskeletal Diseases; Nervous System Diseases; Stomatognathic Diseases; Otorhinolaryngologic Diseases	1	Kinase	FGFR3	CURATED	2261	DTO_03300101	2017	0.846	C0265269	P22607	Disease or Syndrome	Lacrimoauriculodentodigital syndrome	C23;C16;C11;C05;C10;C07;C09	0.72	1995	0.391
disease	0.030057	strong	Musculoskeletal Diseases; Nervous System Diseases; Endocrine System Diseases	1	Signaling	GH1	CURATED	2688	DTO_05007599	2012	0.923	C0342573	P01241	Congenital Abnormality	PITUITARY DWARFISM I	C05;C10;C19	0.72	1993	0.373
disease	4.9944e-08			1	Enzyme	ENPP1	CURATED	5167	DTO_05007624	2018	0.808	C3809781	P22413	Disease or Syndrome	Cole disease		0.72	2009	0.498
disease	6.9451e-10		Congenital, Hereditary, and Neonatal Diseases and Abnormalities; Nutritional and Metabolic Diseases; Female Urogenital Diseases and Pregnancy Complications; Male Urogenital Diseases	1	Transporter	SLC2A9	CURATED	56606	DTO_05007405	2019	0.731	C2677549	Q9NRM0	Disease or Syndrome	Hypouricemia, Renal, 2	C16;C18;C13;C12	0.72	2008	0.619
disease	5.5765e-10	strong	Congenital, Hereditary, and Neonatal Diseases and Abnormalities; Nutritional and Metabolic Diseases	1		APOA5	CURATED	116519		2018	0.615	C0020481	Q6Q788	Disease or Syndrome	Hyperlipoproteinemia Type V	C16;C18	0.72	2005	0.587
disease	0.030182		Nutritional and Metabolic Diseases	1	Nuclear receptor	PPARA	CURATED	5465	DTO_00102000	2004	0.885	C2930930	Q07869	Disease or Syndrome	Abdominal obesity metabolic syndrome	C18	0.3	2004	0.432
disease	1.6432e-05		Pathological Conditions, Signs and Symptoms; Congenital, Hereditary, and Neonatal Diseases and Abnormalities; Musculoskeletal Diseases; Nervous System Diseases; Otorhinolaryngologic Diseases	1	Kinase	FGFR3	CURATED	2261	DTO_03300101	2016	0.846	C1864852	P22607	Disease or Syndrome	CATSHL syndrome	C23;C16;C05;C10;C09	0.71	1995	0.391
disease	0.030057		Musculoskeletal Diseases; Nervous System Diseases; Endocrine System Diseases	1	Signaling	GH1	CURATED	2688	DTO_05007599	2007	0.923	C1849779	P01241	Disease or Syndrome	Kowarski syndrome	C05;C10;C19	0.71	1996	0.373
disease	0.31397		Pathological Conditions, Signs and Symptoms; Congenital, Hereditary, and Neonatal Diseases and Abnormalities; Musculoskeletal Diseases	1		IHH	CURATED	3549		2015	0.538	C1843096	Q14623	Disease or Syndrome	Acrocapitofemoral Dysplasia	C23;C16;C05	0.71	2003	0.573
disease	3.2764e-07		Nutritional and Metabolic Diseases	1	Enzyme	LIPC	CURATED	3990	DTO_05007624	2013	0.654	C3151466	P11150	Disease or Syndrome	HEPATIC LIPASE DEFICIENCY (disorder)	C18	0.71	1991	0.585
disease	4.2042e-05			1	Kinase	NPR2	CURATED	4882	DTO_03300101	2019	0.615	C4014690	P20594	Disease or Syndrome	EPIPHYSEAL CHONDRODYSPLASIA, MIURA TYPE		0.71	2004	0.573
disease	0.010404	strong	Congenital, Hereditary, and Neonatal Diseases and Abnormalities; Nutritional and Metabolic Diseases; Hemic and Lymphatic Diseases	1	Transporter	RHAG	CURATED	6005	DTO_05007405	2013	0.346	C1861455	Q02094	Disease or Syndrome	STOMATOCYTOSIS I	C16;C18;C15	0.71	1998	0.716
disease	1.4921e-16	strong	Congenital, Hereditary, and Neonatal Diseases and Abnormalities; Eye Diseases	1	Enzyme modulator	SAG	CURATED	6295	DTO_05007584	2009	0.731	C0339535	P10523	Congenital Abnormality	Night blindness, congenital stationary	C16;C11	0.71	1995	0.57
disease	9.934e-07		Chemically-Induced Disorders; Mental Disorders	1	Enzyme	ADH1B	CURATED	125	DTO_05007624	2019	0.846	C0001973	P00325	Mental or Behavioral Dysfunction	Alcoholic Intoxication, Chronic	C25;F03	0.7	1994	0.502
disease	0.0003636	strong	Congenital, Hereditary, and Neonatal Diseases and Abnormalities; Nutritional and Metabolic Diseases	1	Enzyme	ALPL	CURATED	249	DTO_05007624	2020	0.769	C0020630	P05186	Disease or Syndrome	Hypophosphatasia	C16;C18	0.7	1992	0.546
group	0.00054909		Cardiovascular Diseases	1		APOA1	CURATED	335		2019	0.885	C0020538	P02647	Disease or Syndrome	Hypertensive disease	C14	0.7	2002	0.429
disease	0.00054909		Congenital, Hereditary, and Neonatal Diseases and Abnormalities; Nutritional and Metabolic Diseases	1		APOA1	CURATED	335		2019	0.885	C0268389	P02647	Disease or Syndrome	Amyloidosis, familial visceral	C16;C18	0.7	1988	0.429
phenotype	0.0018685		Female Urogenital Diseases and Pregnancy Complications	1		APOE	CURATED	348		2012	0.962	C0000822	P02649	Pathologic Function	Abortion, Tubal	C13	0.3	2012	0.338
phenotype	0.91029		Female Urogenital Diseases and Pregnancy Complications	1	Enzyme modulator	IGFBP3	CURATED	3486	DTO_05007584	2008	0.808	C0000822	P17936	Pathologic Function	Abortion, Tubal	C13	0.3	2008	0.439
disease	0.0018685		Nervous System Diseases; Mental Disorders	0.946		APOE	CURATED	348		2020	0.962	C0002395	P02649	Disease or Syndrome	Alzheimer's Disease	C10;F03	0.7	1991	0.338
disease	0.0018685		Cardiovascular Diseases	0.966		APOE	CURATED	348		2019	0.962	C0010068	P02649	Disease or Syndrome	Coronary heart disease	C14	0.7	1983	0.338
disease	0.0018685		Nutritional and Metabolic Diseases	0.957		APOE	CURATED	348		2019	0.962	C0020443	P02649	Disease or Syndrome	Hypercholesterolemia	C18	0.7	1985	0.338
group	0.0018685		Cardiovascular Diseases	0.897		APOE	CURATED	348		2019	0.962	C0020538	P02649	Disease or Syndrome	Hypertensive disease	C14	0.7	1994	0.338
disease	0.0018685	strong	Congenital, Hereditary, and Neonatal Diseases and Abnormalities; Nutritional and Metabolic Diseases; Nervous System Diseases; Hemic and Lymphatic Diseases	1		APOE	CURATED	348		2014	0.962	C0036489	P02649	Disease or Syndrome	Sea-Blue Histiocyte Syndrome	C16;C18;C10;C15	0.7	2000	0.338
disease	0.046698		Endocrine System Diseases	0.966	G-protein coupled receptor	CASR	CURATED	846	DTO_02300001	2019	0.846	C0020502	P41180	Disease or Syndrome	Hyperparathyroidism	C19	0.7	1996	0.41
disease	0.046698		Congenital, Hereditary, and Neonatal Diseases and Abnormalities; Nutritional and Metabolic Diseases; Endocrine System Diseases	0.989	G-protein coupled receptor	CASR	CURATED	846	DTO_02300001	2018	0.846	C1809471	P41180	Disease or Syndrome	Familial benign hypercalcemia	C16;C18;C19	0.7	1991	0.41
disease	0.046698		Congenital, Hereditary, and Neonatal Diseases and Abnormalities; Nutritional and Metabolic Diseases	1	G-protein coupled receptor	CASR	CURATED	846	DTO_02300001	2019	0.846	C4048195	P41180	Disease or Syndrome	Autosomal dominant hypocalcemia	C16;C18	0.7	1995	0.41
disease	1.6432e-05		Neoplasms; Immune System Diseases; Hemic and Lymphatic Diseases; Cardiovascular Diseases	0.971	Kinase	FGFR3	CURATED	2261	DTO_03300101	2019	0.846	C0026764	P22607	Neoplastic Process	Multiple Myeloma	C04;C20;C15;C14	0.7	1997	0.391
disease	0.63464	strong	Nutritional and Metabolic Diseases; Endocrine System Diseases	0.978	Kinase	GCK	CURATED	2645	DTO_03300101	2020	0.808	C0342276	P35557	Disease or Syndrome	Maturity onset diabetes mellitus in young	C18;C19	0.7	1992	0.523
disease	0.63464	strong	Nutritional and Metabolic Diseases	1	Kinase	GCK	CURATED	2645	DTO_03300101	2017	0.808	C1865290	P35557	Disease or Syndrome	Hyperinsulinemic hypoglycemia, familial, 3	C18	0.7	1998	0.523
disease	1		Digestive System Diseases; Neoplasms	1	Receptor	IGF2R	CURATED	3482	DTO_05007575	2019	0.731	C2239176	P11717	Neoplastic Process	Liver carcinoma	C06;C04	0.7	1995	0.518
disease	5.4379e-11			1	Receptor	IGFALS	CURATED	3483	DTO_05007575	2016	0.846	C3900122	P35858	Laboratory or Test Result	Acid-Labile Subunit Deficiency		0.7	2004	0.511
disease	0.65372		Digestive System Diseases; Cardiovascular Diseases	0.944	Kinase	JAK2	CURATED	3717	DTO_03300101	2017	0.885	C0856761	O60674	Disease or Syndrome	Budd-Chiari Syndrome	C06;C14	0.7	2006	0.385
disease	9.841e-24		Cardiovascular Diseases	0.984		LDLR	CURATED	3949		2020	0.885	C0004153	P01130	Disease or Syndrome	Atherosclerosis	C14	0.7	1980	0.449
disease	1.2712e-09		Nutritional and Metabolic Diseases	0.952	Enzyme	LPL	CURATED	4023	DTO_05007624	2019	0.808	C0020473	P06858	Disease or Syndrome	Hyperlipidemia	C18	0.7	1989	0.474
disease	4.9944e-08	moderate	Nutritional and Metabolic Diseases; Endocrine System Diseases	0.814	Enzyme	ENPP1	CURATED	5167	DTO_05007624	2019	0.808	C0011860	P22413	Disease or Syndrome	Diabetes Mellitus, Non-Insulin-Dependent	C18;C19	0.7	2000	0.498
disease	4.9944e-08	moderate	Pathological Conditions, Signs and Symptoms; Nutritional and Metabolic Diseases	0.786	Enzyme	ENPP1	CURATED	5167	DTO_05007624	2019	0.808	C0028754	P22413	Disease or Syndrome	Obesity	C23;C18	0.7	2001	0.498
disease	4.9944e-08		Nutritional and Metabolic Diseases	1	Enzyme	ENPP1	CURATED	5167	DTO_05007624	2018	0.808	C1859727	P22413	Disease or Syndrome	Arterial calcification of infancy	C18	0.7	2003	0.498
disease	4.9944e-08		Pathological Conditions, Signs and Symptoms; Musculoskeletal Diseases	1	Enzyme	ENPP1	CURATED	5167	DTO_05007624	1999	0.808	C1865343	P22413	Disease or Syndrome	OSSIFICATION OF THE POSTERIOR LONGITUDINAL LIGAMENT OF SPINE	C23;C05	0.7	1981	0.498
disease	4.9944e-08		Congenital, Hereditary, and Neonatal Diseases and Abnormalities; Nutritional and Metabolic Diseases; Female Urogenital Diseases and Pregnancy Complications; Musculoskeletal Diseases; Male Urogenital Diseases	1	Enzyme	ENPP1	CURATED	5167	DTO_05007624	2015	0.808	C2750078	P22413	Disease or Syndrome	Hypophosphatemic Rickets, Autosomal Recessive, 2	C16;C18;C13;C05;C12	0.7	2005	0.498
disease	0.010345	definitive	Hemic and Lymphatic Diseases	0.958	Enzyme	PLG	CURATED	5340	DTO_05007624	2019	0.923	C0398621	P00747	Disease or Syndrome	Hypoplasminogenemia	C15	0.7	1988	0.389
disease	3.4212e-10	strong		1		POR	CURATED	5447		2006	0.769	C3150099	P16435	Disease or Syndrome	ANTLEY-BIXLER SYNDROME WITH GENITAL ANOMALIES AND DISORDERED STEROIDOGENESIS		0.7	2002	0.502
disease	0.010404	strong	Hemic and Lymphatic Diseases	1	Transporter	RHAG	CURATED	6005	DTO_05007405	2009	0.346	C1849387	Q02094	Disease or Syndrome	Rh-Null, Regulator Type	C15	0.7	1996	0.716
disease	1	strong		1		SPTB	CURATED	6710		2016	0.462	C2674219	P11277	Disease or Syndrome	SPHEROCYTOSIS, HEREDITARY, 2		0.7	1993	0.65
disease	3.9379e-21	strong		1	Ion channel	PIEZO1	CURATED	9780	DTO_01300327	2019	0.769	C4225184	Q92508	Disease or Syndrome	LYMPHATIC MALFORMATION 6		0.7	2012	0.552
disease	0.00093892	strong		1	Nuclear receptor	NR1H4	CURATED	9971	DTO_00102000	2016	0.808	C4310747	Q96RI1	Disease or Syndrome	CHOLESTASIS, PROGRESSIVE FAMILIAL INTRAHEPATIC, 5		0.7	2016	0.513
disease	2.0908e-15	limited	Immune System Diseases	1		TNFRSF13B	CURATED	23495		2019	0.769	C0009447	O14836	Disease or Syndrome	Common Variable Immunodeficiency	C20	0.7	1986	0.558
disease	2.0908e-15	limited	Immune System Diseases; Hemic and Lymphatic Diseases	1		TNFRSF13B	CURATED	23495		2017	0.769	C1836032	O14836	Disease or Syndrome	Immunoglobulin a deficiency 2	C20;C15	0.7	2005	0.558
disease	3.2577e-06		Pathological Conditions, Signs and Symptoms; Congenital, Hereditary, and Neonatal Diseases and Abnormalities; Nutritional and Metabolic Diseases	1		UGT1A1	CURATED	54658		2013	0.769	C0270210	P22309	Disease or Syndrome	Lucey-Driscoll syndrome (disorder)	C23;C16;C18	0.7	2000	0.464
disease	0.96452		Digestive System Diseases	0.953		ATG16L1	CURATED	55054		2020	0.769	C0010346	Q676U5	Disease or Syndrome	Crohn Disease	C06	0.7	2001	0.543
disease	0.96452		Digestive System Diseases	1		ATG16L1	CURATED	55054		2016	0.769	C1970207	Q676U5	Disease or Syndrome	Inflammatory Bowel Disease 10	C06	0.7	2007	0.543
disease	1.1608e-12		Congenital, Hereditary, and Neonatal Diseases and Abnormalities; Cardiovascular Diseases	1		TMEM43	CURATED	79188		2017	0.462	C1858379	Q9BTV4	Disease or Syndrome	ARRHYTHMOGENIC RIGHT VENTRICULAR DYSPLASIA, FAMILIAL, 5 (disorder)	C16;C14	0.7	2008	0.653
phenotype	5.5765e-10		Nutritional and Metabolic Diseases	0.966		APOA5	CURATED	116519		2020	0.615	C0020557	Q6Q788	Disease or Syndrome	Hypertriglyceridemia	C18	0.7	2002	0.587
disease	2.7059e-17	strong	Nutritional and Metabolic Diseases	0.966	Enzyme	PCSK9	CURATED	255738	DTO_05007624	2020	0.808	C0020443	Q8NBP7	Disease or Syndrome	Hypercholesterolemia	C18	0.7	2003	0.482
disease	2.7059e-17	strong	Nutritional and Metabolic Diseases	1	Enzyme	PCSK9	CURATED	255738	DTO_05007624	2017	0.808	C1863551	Q8NBP7	Disease or Syndrome	HYPERCHOLESTEROLEMIA, AUTOSOMAL DOMINANT, 3	C18	0.7	2003	0.482
disease	1.6432e-05		Neoplasms	1	Kinase	FGFR3	CURATED	2261	DTO_03300101	2017	0.846	C0334082	P22607	Disease or Syndrome	NEVUS, EPIDERMAL (disorder)	C04	0.69	2006	0.391
disease	3.2764e-07		Nutritional and Metabolic Diseases; Endocrine System Diseases	1	Enzyme	LIPC	CURATED	3990	DTO_05007624	2018	0.654	C0011860	P11150	Disease or Syndrome	Diabetes Mellitus, Non-Insulin-Dependent	C18;C19	0.68	2001	0.585
disease	1.2712e-09		Nutritional and Metabolic Diseases	1	Enzyme	LPL	CURATED	4023	DTO_05007624	2019	0.808	C0020443	P06858	Disease or Syndrome	Hypercholesterolemia	C18	0.68	1993	0.474
disease	1		Congenital, Hereditary, and Neonatal Diseases and Abnormalities; Hemic and Lymphatic Diseases	1		SPTB	CURATED	6710		2020	0.462	C0037889	P11277	Disease or Syndrome	Hereditary spherocytosis	C16;C15	0.68	1990	0.65
disease	1.6432e-05		Digestive System Diseases; Neoplasms	1	Kinase	FGFR3	CURATED	2261	DTO_03300101	2018	0.846	C0009402	P22607	Neoplastic Process	Colorectal Carcinoma	C06;C04	0.66	2000	0.391
disease	1.6432e-05		Neoplasms	1	Kinase	FGFR3	CURATED	2261	DTO_03300101	2018	0.846	C0152013	P22607	Neoplastic Process	Adenocarcinoma of lung (disorder)	C04	0.65	2013	0.391
disease	1.4921e-16	strong	Congenital, Hereditary, and Neonatal Diseases and Abnormalities; Eye Diseases	1	Enzyme modulator	SAG	CURATED	6295	DTO_05007584	2018	0.731	C0035334	P10523	Disease or Syndrome	Retinitis Pigmentosa	C16;C11	0.65	1985	0.57
disease	1.4921e-16	strong	Congenital, Hereditary, and Neonatal Diseases and Abnormalities; Eye Diseases	0.857	Enzyme modulator	SAG	CURATED	6295	DTO_05007584	2012	0.731	C1306122	P10523	Disease or Syndrome	Oguchi disease	C16;C11	0.65	1995	0.57
disease	9.841e-24		Digestive System Diseases	1		LDLR	CURATED	3949		2019	0.885	C0015695	P01130	Disease or Syndrome	Fatty Liver	C06	0.64	1997	0.449
disease	5.321e-24	limited	Congenital, Hereditary, and Neonatal Diseases and Abnormalities; Nutritional and Metabolic Diseases	1	Transporter	SLCO1B3	CURATED	28234	DTO_05007405	2015	0.769	C0220991	Q9NPD5	Disease or Syndrome	Rotor Syndrome	C16;C18	0.64	2012	0.592
disease	0.56616	strong	Congenital, Hereditary, and Neonatal Diseases and Abnormalities; Hemic and Lymphatic Diseases	1	Signaling	FGB	CURATED	2244	DTO_05007599	2019	0.692	C4316812	P02675	Disease or Syndrome	Fibrinogen Deficiency	C16;C15	0.63	2013	0.584
disease	0.0003636		Congenital, Hereditary, and Neonatal Diseases and Abnormalities; Nutritional and Metabolic Diseases; Stomatognathic Diseases	1	Enzyme	ALPL	CURATED	249	DTO_05007624	2015	0.769	C1840322	P05186	Disease or Syndrome	ODONTOHYPOPHOSPHATASIA (disorder)	C16;C18;C07	0.61	1995	0.546
disease	0.010024		Nutritional and Metabolic Diseases	1		APOC3	CURATED	345		2016	0.731	C3151467	P02656	Disease or Syndrome	Apolipoprotein C-III Deficiency	C18	0.61	1991	0.531
disease	0.56616	strong	Congenital, Hereditary, and Neonatal Diseases and Abnormalities; Hemic and Lymphatic Diseases	1	Signaling	FGB	CURATED	2244	DTO_05007599	2015	0.692	C0272350	P02675	Disease or Syndrome	Dysfibrinogenemia, Congenital	C16;C15	0.61	1992	0.584
disease	1.134e-08	strong		1		TDP2	CURATED	51567		2019	0.462	C4310780	O95551	Disease or Syndrome	SPINOCEREBELLAR ATAXIA, AUTOSOMAL RECESSIVE 23		0.61	2014	0.628
disease	5.5765e-10	strong	Congenital, Hereditary, and Neonatal Diseases and Abnormalities; Nutritional and Metabolic Diseases	1		APOA5	CURATED	116519		2016	0.615	C0020480	Q6Q788	Disease or Syndrome	Hyperlipoproteinemia Type IV	C16;C18	0.61	2005	0.587
disease	9.934e-07		Chemically-Induced Disorders; Mental Disorders	1	Enzyme	ADH1B	CURATED	125	DTO_05007624	2019	0.846	C0085762	P00325	Mental or Behavioral Dysfunction	Alcohol abuse	C25;F03	0.6	1994	0.502
disease	0.64329		Female Urogenital Diseases and Pregnancy Complications; Male Urogenital Diseases; Endocrine System Diseases	0.96	Transporter	ALB	CURATED	213	DTO_05007405	2020	0.962	C0011881	P02768	Disease or Syndrome	Diabetic Nephropathy	C13;C12;C19	0.6	1989	0.317
disease	0.0003636		Congenital, Hereditary, and Neonatal Diseases and Abnormalities; Nutritional and Metabolic Diseases	1	Enzyme	ALPL	CURATED	249	DTO_05007624	2013	0.769	C2673477	P05186	Disease or Syndrome	Hypophosphatasia, Perinatal Lethal	C16;C18	0.6	1995	0.546
phenotype	0.65372		Female Urogenital Diseases and Pregnancy Complications	1	Kinase	JAK2	CURATED	3717	DTO_03300101	2007	0.885	C0000822	O60674	Pathologic Function	Abortion, Tubal	C13	0.3	2007	0.385
disease	0.0018685		Nutritional and Metabolic Diseases	0.957		APOE	CURATED	348		2020	0.962	C0020473	P02649	Disease or Syndrome	Hyperlipidemia	C18	0.6	1979	0.338
disease	0.0018685		Mental Disorders	0.78		APOE	CURATED	348		2019	0.962	C0036341	P02649	Mental or Behavioral Dysfunction	Schizophrenia	F03	0.6	1995	0.338
disease	0.0018685		Congenital, Hereditary, and Neonatal Diseases and Abnormalities; Nutritional and Metabolic Diseases	0.889		APOE	CURATED	348		2020	0.962	C0745103	P02649	Disease or Syndrome	Hyperlipoproteinemia Type IIa	C16;C18	0.6	1989	0.338
phenotype	0.066228	limited		1	Receptor	SCARB1	CURATED	949	DTO_05007575	2016	0.731	C1853096	Q8WTV0	Finding	HIGH DENSITY LIPOPROTEIN CHOLESTEROL LEVEL QUANTITATIVE TRAIT LOCUS 6		0.6	2016	0.559
disease	0.0036969		Skin and Connective Tissue Diseases; Musculoskeletal Diseases; Immune System Diseases	0.955		CRP	CURATED	1401		2020	0.962	C0003873	P02741	Disease or Syndrome	Rheumatoid Arthritis	C17;C05;C20	0.6	1989	0.299
group	0.0036969		Cardiovascular Diseases	0.944		CRP	CURATED	1401		2020	0.962	C0020538	P02741	Disease or Syndrome	Hypertensive disease	C14	0.6	2003	0.299
phenotype	0.0036969		Pathological Conditions, Signs and Symptoms	1		CRP	CURATED	1401		2011	0.962	C0021368	P02741	Pathologic Function	Inflammation	C23	0.6	2001	0.299
disease	0.0036969		Pathological Conditions, Signs and Symptoms; Nutritional and Metabolic Diseases	0.98		CRP	CURATED	1401		2020	0.962	C0028754	P02741	Disease or Syndrome	Obesity	C23;C18	0.6	2001	0.299
disease	0.0036969		Cardiovascular Diseases	0.938		CRP	CURATED	1401		2019	0.962	C0151744	P02741	Disease or Syndrome	Myocardial Ischemia	C14	0.6	2000	0.299
disease	0.0039011		Eye Diseases	1		CST3	CURATED	1471		2009	0.808	C2677774	P01034	Disease or Syndrome	Age-Related Macular Degeneration type 11	C11	0.6	1989	0.436
disease	1.6432e-05		Neoplasms; Female Urogenital Diseases and Pregnancy Complications; Male Urogenital Diseases	0.981	Kinase	FGFR3	CURATED	2261	DTO_03300101	2019	0.846	C0005695	P22607	Neoplastic Process	Bladder Neoplasm	C04;C13;C12	0.6	2001	0.391
disease	1.6432e-05		Congenital, Hereditary, and Neonatal Diseases and Abnormalities; Musculoskeletal Diseases	1	Kinase	FGFR3	CURATED	2261	DTO_03300101	2019	0.846	C0039743	P22607	Congenital Abnormality	Thanatophoric Dysplasia	C16;C05	0.6	1995	0.391
disease	7.5307e-05	limited	Congenital, Hereditary, and Neonatal Diseases and Abnormalities; Nutritional and Metabolic Diseases	1	Enzyme	GGT1	CURATED	2678	DTO_05007624	2018	0.885	C0268524	P19440	Disease or Syndrome	gamma-Glutamyltransferase deficiency	C16;C18	0.6	2014	0.496
disease	0.030057	strong	Congenital, Hereditary, and Neonatal Diseases and Abnormalities; Musculoskeletal Diseases; Nervous System Diseases; Endocrine System Diseases	1	Signaling	GH1	CURATED	2688	DTO_05007599	2012	0.923	C2748571	P01241	Disease or Syndrome	Isolated Growth Hormone Deficiency, Type IB	C16;C05;C10;C19	0.6	2003	0.373
phenotype	5.4379e-11		Endocrine System Diseases	1	Receptor	IGFALS	CURATED	3483	DTO_05007575	2007	0.846	C0034012	P35858	Pathologic Function	Delayed Puberty	C19	0.6	2004	0.511
disease	0.91029		Digestive System Diseases; Neoplasms	0.815	Enzyme modulator	IGFBP3	CURATED	3486	DTO_05007584	2019	0.808	C0009402	P17936	Neoplastic Process	Colorectal Carcinoma	C06;C04	0.6	2004	0.439
disease	0.65372		Digestive System Diseases; Cardiovascular Diseases	0.938	Kinase	JAK2	CURATED	3717	DTO_03300101	2017	0.885	C0019154	O60674	Disease or Syndrome	Hepatic Vein Thrombosis	C06;C14	0.6	2006	0.385
disease	0.65372		Pathological Conditions, Signs and Symptoms; Neoplasms; Hemic and Lymphatic Diseases	0.955	Kinase	JAK2	CURATED	3717	DTO_03300101	2020	0.885	C0026987	O60674	Neoplastic Process	Myelofibrosis	C23;C04;C15	0.6	2005	0.385
phenotype	3.2764e-07			1	Enzyme	LIPC	CURATED	3990	DTO_05007624	2013	0.654	C2675071	P11150	Finding	HIGH DENSITY LIPOPROTEIN CHOLESTEROL LEVEL QUANTITATIVE TRAIT LOCUS 12		0.6	2013	0.585
phenotype	1.2712e-09		Nutritional and Metabolic Diseases	0.988	Enzyme	LPL	CURATED	4023	DTO_05007624	2019	0.808	C0020557	P06858	Disease or Syndrome	Hypertriglyceridemia	C18	0.6	1975	0.474
disease	1.2712e-09		Pathological Conditions, Signs and Symptoms; Nutritional and Metabolic Diseases	0.949	Enzyme	LPL	CURATED	4023	DTO_05007624	2019	0.808	C0028754	P06858	Disease or Syndrome	Obesity	C23;C18	0.6	1995	0.474
disease	4.2042e-05	strong		1	Kinase	NPR2	CURATED	4882	DTO_03300101	2014	0.615	C4225399	P20594	Disease or Syndrome	SHORT STATURE WITH NONSPECIFIC SKELETAL ABNORMALITIES		0.6	2013	0.573
disease	4.9944e-08		Nutritional and Metabolic Diseases	1	Enzyme	ENPP1	CURATED	5167	DTO_05007624	2016	0.808	C4551985	P22413	Disease or Syndrome	ARTERIAL CALCIFICATION, GENERALIZED, OF INFANCY, 1	C18	0.6	2003	0.498
disease	0.010345		Congenital, Hereditary, and Neonatal Diseases and Abnormalities; Eye Diseases; Skin and Connective Tissue Diseases	1	Enzyme	PLG	CURATED	5340	DTO_05007624	2019	0.923	C1274789	P00747	Disease or Syndrome	Ligneous conjunctivitis	C16;C11;C17	0.6	1997	0.389
phenotype	0.0003636		Pathological Conditions, Signs and Symptoms; Nervous System Diseases	1	Enzyme	ALPL	CURATED	249	DTO_05007624	2016	0.769	C4316903	P05186	Disease or Syndrome	Absence Seizures	C23;C10	0.3	1995	0.546
disease	0.99985	strong		1	Nuclear receptor	RORC	CURATED	6097	DTO_00102000	2015	0.769	C4225266	P51449	Disease or Syndrome	IMMUNODEFICIENCY 42		0.6	2015	0.576
disease	1.4921e-16	limited		NA	Enzyme modulator	SAG	CURATED	6295	DTO_05007584	NA	0.731	C3151061	P10523	Disease or Syndrome	RETINITIS PIGMENTOSA 47		0.6	NA	0.57
disease	1.4921e-16		Congenital, Hereditary, and Neonatal Diseases and Abnormalities; Eye Diseases	1	Enzyme modulator	SAG	CURATED	6295	DTO_05007584	1998	0.731	C4551824	P10523	Disease or Syndrome	Oguchi Disease 1	C16;C11	0.6	1995	0.57
disease	1	strong	Congenital, Hereditary, and Neonatal Diseases and Abnormalities; Hemic and Lymphatic Diseases	1		SPTB	CURATED	6710		1995	0.462	C1866810	P11277	Disease or Syndrome	ELLIPTOCYTOSIS 3	C16;C15	0.6	1990	0.65
disease	0.17259	moderate		1		TFAM	CURATED	7019		2016	0.731	C4310690	Q00059	Disease or Syndrome	MITOCHONDRIAL DNA DEPLETION SYNDROME 15 (HEPATOCEREBRAL TYPE)		0.6	2016	0.529
disease	3.9379e-21	strong	Pathological Conditions, Signs and Symptoms; Congenital, Hereditary, and Neonatal Diseases and Abnormalities; Female Urogenital Diseases and Pregnancy Complications; Immune System Diseases; Hemic and Lymphatic Diseases	1	Ion channel	PIEZO1	CURATED	9780	DTO_01300327	2020	0.769	C0272051	Q92508	Disease or Syndrome	Xerocytosis	C23;C16;C13;C20;C15	0.6	2012	0.552
disease	3.9379e-21	strong	Pathological Conditions, Signs and Symptoms; Congenital, Hereditary, and Neonatal Diseases and Abnormalities; Female Urogenital Diseases and Pregnancy Complications; Immune System Diseases; Hemic and Lymphatic Diseases	1	Ion channel	PIEZO1	CURATED	9780	DTO_01300327	2015	0.769	C4551512	Q92508	Disease or Syndrome	DEHYDRATED HEREDITARY STOMATOCYTOSIS 1 WITH OR WITHOUT PSEUDOHYPERKALEMIA AND/OR PERINATAL EDEMA	C23;C16;C13;C20;C15	0.6	2012	0.552
disease	0.00093892		Digestive System Diseases	0.923	Nuclear receptor	NR1H4	CURATED	9971	DTO_00102000	2019	0.808	C0008370	Q96RI1	Disease or Syndrome	Cholestasis	C06	0.6	2003	0.513
disease	2.0908e-15			1		TNFRSF13B	CURATED	23495		2017	0.769	C3150354	O14836	Disease or Syndrome	IMMUNODEFICIENCY, COMMON VARIABLE, 2		0.6	2005	0.558
disease	6.9451e-10		Pathological Conditions, Signs and Symptoms; Congenital, Hereditary, and Neonatal Diseases and Abnormalities; Nutritional and Metabolic Diseases; Female Urogenital Diseases and Pregnancy Complications; Male Urogenital Diseases	1	Transporter	SLC2A9	CURATED	56606	DTO_05007405	2019	0.731	C0473219	Q9NRM0	Disease or Syndrome	Renal hypouricemia	C23;C16;C18;C13;C12	0.6	2008	0.619
disease	1		Pathological Conditions, Signs and Symptoms; Congenital, Hereditary, and Neonatal Diseases and Abnormalities; Musculoskeletal Diseases; Nervous System Diseases; Mental Disorders; Stomatognathic Diseases; Behavior and Behavior Mechanisms	1		ARID1B	CURATED	57492		2019	0.846	C3281201	Q8NFD5	Disease or Syndrome	MENTAL RETARDATION, AUTOSOMAL DOMINANT 12	C23;C16;C05;C10;F03;C07;F01	0.6	2012	0.503
disease	1.1608e-12			1		TMEM43	CURATED	79188		2017	0.462	C3553060	Q9BTV4	Disease or Syndrome	EMERY-DREIFUSS MUSCULAR DYSTROPHY 7, AUTOSOMAL DOMINANT		0.6	2011	0.653
disease	1.1401e-14		Infections; Skin and Connective Tissue Diseases	1	Ion channel	TMC8	CURATED	147138	DTO_01300327	2018	0.231	C0014522	Q8IU68	Neoplastic Process	Epidermodysplasia Verruciformis	C01;C17	0.6	2002	0.705
phenotype	0.0018685		Pathological Conditions, Signs and Symptoms; Nervous System Diseases	1		APOE	CURATED	348		2013	0.962	C4316903	P02649	Disease or Syndrome	Absence Seizures	C23;C10	0.3	2013	0.338
phenotype	0.0184		Pathological Conditions, Signs and Symptoms; Nervous System Diseases	1	Signaling	FGF2	CURATED	2247	DTO_05007599	2011	0.923	C4316903	P09038	Disease or Syndrome	Absence Seizures	C23;C10	0.3	2011	0.383
disease	0.15499		Cardiovascular Diseases	0.917	Enzyme	SOD2	CURATED	6648	DTO_05007624	2020	0.923	C0018802	P04179	Disease or Syndrome	Congestive heart failure	C14	0.57	2005	0.379
disease	0.00054909	strong	Congenital, Hereditary, and Neonatal Diseases and Abnormalities; Nutritional and Metabolic Diseases	1		APOA1	CURATED	335		2016	0.885	C1704429	P02647	Disease or Syndrome	Hypoalphalipoproteinemia, Familial	C16;C18	0.56	1986	0.429
disease	1.4525e-13	limited	Nutritional and Metabolic Diseases	1	Transporter	ABCA1	CURATED	19	DTO_05007405	2017	0.846	C0020443	O95477	Disease or Syndrome	Hypercholesterolemia	C18	0.55	2002	0.467
phenotype	0.15499		Pathological Conditions, Signs and Symptoms; Nervous System Diseases	1	Enzyme	SOD2	CURATED	6648	DTO_05007624	2010	0.923	C4316903	P04179	Disease or Syndrome	Absence Seizures	C23;C10	0.3	2010	0.379
disease	0.15499		Cardiovascular Diseases	1	Enzyme	SOD2	CURATED	6648	DTO_05007624	2020	0.923	C0018801	P04179	Disease or Syndrome	Heart failure	C14	0.55	2005	0.379
group	0.15499		Cardiovascular Diseases	1	Enzyme	SOD2	CURATED	6648	DTO_05007624	2019	0.923	C0020538	P04179	Disease or Syndrome	Hypertensive disease	C14	0.55	2002	0.379
disease	5.321e-24		Digestive System Diseases; Neoplasms	1	Transporter	SLCO1B3	CURATED	28234	DTO_05007405	2020	0.769	C0009402	Q9NPD5	Neoplastic Process	Colorectal Carcinoma	C06;C04	0.55	2008	0.592
disease	1.6432e-05		Neoplasms; Female Urogenital Diseases and Pregnancy Complications	1	Kinase	FGFR3	CURATED	2261	DTO_03300101	2019	0.846	C4048328	P22607	Neoplastic Process	cervical cancer	C04;C13	0.54	1999	0.391
disease	3.2764e-07		Nutritional and Metabolic Diseases	1	Enzyme	LIPC	CURATED	3990	DTO_05007624	2019	0.654	C0020443	P11150	Disease or Syndrome	Hypercholesterolemia	C18	0.54	1995	0.585
disease	0.45637		Infections	1	Cell adhesion	FCGR2B	CURATED	2213	DTO_05007620	2014	0.846	C0024530	P31994	Disease or Syndrome	Malaria	C01	0.53	2007	0.522
phenotype	0.64329		Pathological Conditions, Signs and Symptoms	1	Transporter	ALB	CURATED	213	DTO_05007405	1973	0.962	C0234238	P02768	Sign or Symptom	Ache	C23	0.3	1973	0.317
disease	0.00093892		Digestive System Diseases; Neoplasms	1	Nuclear receptor	NR1H4	CURATED	9971	DTO_00102000	2016	0.808	C2239176	Q96RI1	Neoplastic Process	Liver carcinoma	C06;C04	0.53	2000	0.513
disease	0.00010289	moderate	Neoplasms; Immune System Diseases; Hemic and Lymphatic Diseases	1		SH2B3	CURATED	10019		2018	0.692	C1961102	Q9UQQ2	Neoplastic Process	Precursor Cell Lymphoblastic Leukemia Lymphoma	C04;C20;C15	0.53	2013	0.527
disease	1.4525e-13		Digestive System Diseases; Neoplasms	1	Transporter	ABCA1	CURATED	19	DTO_05007405	2018	0.846	C0009402	O95477	Neoplastic Process	Colorectal Carcinoma	C06;C04	0.52	2012	0.467
disease	1.4525e-13	limited	Congenital, Hereditary, and Neonatal Diseases and Abnormalities; Nutritional and Metabolic Diseases	1	Transporter	ABCA1	CURATED	19	DTO_05007405	2019	0.846	C0745103	O95477	Disease or Syndrome	Hyperlipoproteinemia Type IIa	C16;C18	0.52	2005	0.467
disease	0.15499		Pathological Conditions, Signs and Symptoms; Cardiovascular Diseases	1	Enzyme	SOD2	CURATED	6648	DTO_05007624	2019	0.923	C0027051	P04179	Disease or Syndrome	Myocardial Infarction	C23;C14	0.52	1997	0.379
group	0.00093892		Digestive System Diseases; Neoplasms	1	Nuclear receptor	NR1H4	CURATED	9971	DTO_00102000	2018	0.808	C0023903	Q96RI1	Neoplastic Process	Liver neoplasms	C06;C04	0.52	2000	0.513
disease	0.00093892		Digestive System Diseases; Neoplasms	1	Nuclear receptor	NR1H4	CURATED	9971	DTO_00102000	2018	0.808	C0345904	Q96RI1	Neoplastic Process	Malignant neoplasm of liver	C06;C04	0.52	2000	0.513
disease	0.00010289		Hemic and Lymphatic Diseases	1		SH2B3	CURATED	10019		2017	0.692	C0040028	Q9UQQ2	Disease or Syndrome	Thrombocythemia, Essential	C15	0.52	2011	0.527
disease	1		Digestive System Diseases; Neoplasms	1		ARID1B	CURATED	57492		2018	0.846	C2239176	Q8NFD5	Neoplastic Process	Liver carcinoma	C06;C04	0.52	2012	0.503
phenotype	0.0184		Pathological Conditions, Signs and Symptoms	1	Signaling	FGF2	CURATED	2247	DTO_05007599	2010	0.923	C0021368	P09038	Pathologic Function	Inflammation	C23	0.51	2002	0.383
disease	1.6432e-05		Neoplasms; Female Urogenital Diseases and Pregnancy Complications	1	Kinase	FGFR3	CURATED	2261	DTO_03300101	2005	0.846	C0007873	P22607	Neoplastic Process	Uterine Cervical Neoplasm	C04;C13	0.51	2005	0.391
disease	7.5307e-05		Chemically-Induced Disorders; Mental Disorders	1	Enzyme	GGT1	CURATED	2678	DTO_05007624	2003	0.885	C0001973	P19440	Mental or Behavioral Dysfunction	Alcoholic Intoxication, Chronic	C25;F03	0.51	1980	0.496
disease	1.2538e-06		Chemically-Induced Disorders; Mental Disorders	1		SHBG	CURATED	6462		2019	0.808	C0001973	P04278	Mental or Behavioral Dysfunction	Alcoholic Intoxication, Chronic	C25;F03	0.51	1994	0.438
group	0.15499		Cardiovascular Diseases	1	Enzyme	SOD2	CURATED	6648	DTO_05007624	2020	0.923	C0007193	P04179	Disease or Syndrome	Cardiomyopathy, Dilated	C14	0.51	2005	0.379
disease	0.15499		Cardiovascular Diseases	1	Enzyme	SOD2	CURATED	6648	DTO_05007624	2018	0.923	C0162871	P04179	Disease or Syndrome	Aortic Aneurysm, Abdominal	C14	0.51	2007	0.379
group	9.934e-07		Digestive System Diseases; Neoplasms	1	Enzyme	ADH1B	CURATED	125	DTO_05007624	2016	0.846	C0014859	P00325	Neoplastic Process	Esophageal Neoplasms	C06;C04	0.5	1997	0.502
disease	9.934e-07		Digestive System Diseases; Neoplasms	1	Enzyme	ADH1B	CURATED	125	DTO_05007624	2016	0.846	C0546837	P00325	Neoplastic Process	Malignant neoplasm of esophagus	C06;C04	0.5	1997	0.502
disease	0.64329		Hemic and Lymphatic Diseases	0.973	Transporter	ALB	CURATED	213	DTO_05007405	2020	0.962	C0239981	P02768	Disease or Syndrome	Hypoalbuminemia	C15	0.5	1998	0.317
disease	2.0908e-15		Immune System Diseases	1		TNFRSF13B	CURATED	23495		2014	0.769	C2936664	O14836	Disease or Syndrome	Acquired Hypogammaglobulinemia	C20	0.4	1999	0.558
phenotype	0.15499		Congenital, Hereditary, and Neonatal Diseases and Abnormalities; Nervous System Diseases	1	Enzyme	SOD2	CURATED	6648	DTO_05007624	2012	0.923	C0751316	P04179	Acquired Abnormality	Acquired Meningomyelocele	C16;C10	0.3	2012	0.379
group	3.0504e-07		Nutritional and Metabolic Diseases; Nervous System Diseases	1	Enzyme	ALDH5A1	CURATED	7915	DTO_05007624	2007	0.462	C1135773	P51649	Disease or Syndrome	Acquired Metabolic Diseases, Nervous System	C18;C10	0.3	2007	0.619
disease	0.030057		Musculoskeletal Diseases; Nervous System Diseases; Endocrine System Diseases	0.982	Signaling	GH1	CURATED	2688	DTO_05007599	2020	0.923	C0001206	P01241	Disease or Syndrome	Acromegaly	C05;C10;C19	0.4	1978	0.373
disease	0.31397	strong	Congenital, Hereditary, and Neonatal Diseases and Abnormalities; Musculoskeletal Diseases	1		IHH	CURATED	3549		2015	0.538	C1863307	Q14623	Disease or Syndrome	Acropectorovertebral Dysplasia, F-Form	C16;C05	0.3	2015	0.573
group	1.9234e-16		Cardiovascular Diseases	1		APOB	CURATED	338		2020	0.808	C0007222	P04114	Disease or Syndrome	Cardiovascular Diseases	C14	0.5	1995	0.453
group	0.0018685		Cardiovascular Diseases	0.953		APOE	CURATED	348		2020	0.962	C0007222	P02649	Disease or Syndrome	Cardiovascular Diseases	C14	0.5	1995	0.338
disease	0.0018685		Pathological Conditions, Signs and Symptoms; Nutritional and Metabolic Diseases	0.974		APOE	CURATED	348		2019	0.962	C0028754	P02649	Disease or Syndrome	Obesity	C23;C18	0.5	1988	0.338
disease	0.0018685		Nutritional and Metabolic Diseases; Nervous System Diseases; Cardiovascular Diseases	0.971		APOE	CURATED	348		2019	0.962	C0085220	P02649	Disease or Syndrome	Cerebral Amyloid Angiopathy	C18;C10;C14	0.5	1996	0.338
disease	0.0018685		Eye Diseases	0.902		APOE	CURATED	348		2019	0.962	C0242383	P02649	Disease or Syndrome	Age related macular degeneration	C11	0.5	1998	0.338
disease	0.0018685		Nervous System Diseases; Mental Disorders	0.935		APOE	CURATED	348		2020	0.962	C0750901	P02649	Disease or Syndrome	Alzheimer Disease, Early Onset	C10;F03	0.5	1993	0.338
disease	0.046698		Nutritional and Metabolic Diseases	0.955	G-protein coupled receptor	CASR	CURATED	846	DTO_02300001	2020	0.846	C0020437	P41180	Disease or Syndrome	Hypercalcemia	C18	0.5	1976	0.41
phenotype	0.046698		Nutritional and Metabolic Diseases	1	G-protein coupled receptor	CASR	CURATED	846	DTO_02300001	2019	0.846	C0020598	P41180	Disease or Syndrome	Hypocalcemia	C18	0.5	1994	0.41
disease	0.046698		Endocrine System Diseases	0.917	G-protein coupled receptor	CASR	CURATED	846	DTO_02300001	2019	0.846	C0020626	P41180	Disease or Syndrome	Hypoparathyroidism	C19	0.5	1995	0.41
disease	0.046698			1	G-protein coupled receptor	CASR	CURATED	846	DTO_02300001	2012	0.846	C4552089	P41180	Disease or Syndrome	HYPOCALCEMIA, AUTOSOMAL DOMINANT 1, WITH BARTTER SYNDROME		0.5	1999	0.41
disease	1.1892e-23		Nutritional and Metabolic Diseases	0.923		CETP	CURATED	1071		2019	0.731	C0020443	P11597	Disease or Syndrome	Hypercholesterolemia	C18	0.5	1995	0.512
group	0.0039011	limited	Nervous System Diseases; Cardiovascular Diseases	1		CST3	CURATED	1471		2020	0.808	C0038454	P01034	Disease or Syndrome	Cerebrovascular accident	C10;C14	0.5	1989	0.436
phenotype	0.0184		Pathological Conditions, Signs and Symptoms; Cardiovascular Diseases	1	Signaling	FGF2	CURATED	2247	DTO_05007599	2008	0.923	C0018800	P09038	Finding	Cardiomegaly	C23;C14	0.5	1999	0.383
disease	1.6432e-05		Skin and Connective Tissue Diseases	1	Kinase	FGFR3	CURATED	2261	DTO_03300101	2018	0.846	C0022603	P22607	Neoplastic Process	Seborrheic keratosis	C17	0.5	2005	0.391
disease	1.6432e-05		Neoplasms; Female Urogenital Diseases and Pregnancy Complications; Male Urogenital Diseases	0.979	Kinase	FGFR3	CURATED	2261	DTO_03300101	2019	0.846	C0699885	P22607	Neoplastic Process	Carcinoma of bladder	C04;C13;C12	0.5	2001	0.391
disease	1.6432e-05		Digestive System Diseases; Neoplasms	NA	Kinase	FGFR3	CURATED	2261	DTO_03300101	NA	0.846	C1319315	P22607	Neoplastic Process	Adenocarcinoma of large intestine	C06;C04	0.5	NA	0.391
disease	1.6432e-05		Neoplasms; Male Urogenital Diseases; Endocrine System Diseases	1	Kinase	FGFR3	CURATED	2261	DTO_03300101	2009	0.846	C1336708	P22607	Neoplastic Process	Testicular Germ Cell Tumor	C04;C12;C19	0.5	2009	0.391
disease	0.63464		Nutritional and Metabolic Diseases; Endocrine System Diseases	1	Kinase	GCK	CURATED	2645	DTO_03300101	2005	0.808	C0011853	P35557	Experimental Model of Disease	Diabetes Mellitus, Experimental	C18;C19	0.5	1990	0.523
disease	0.63464		Nutritional and Metabolic Diseases	1	Kinase	GCK	CURATED	2645	DTO_03300101	2020	0.808	C0020456	P35557	Disease or Syndrome	Hyperglycemia	C18	0.5	1992	0.523
disease	0.63464		Congenital, Hereditary, and Neonatal Diseases and Abnormalities; Digestive System Diseases; Nutritional and Metabolic Diseases	0.958	Kinase	GCK	CURATED	2645	DTO_03300101	2019	0.808	C3888018	P35557	Disease or Syndrome	Congenital Hyperinsulinism	C16;C06;C18	0.5	1997	0.523
disease	0.63464	strong	Nutritional and Metabolic Diseases; Endocrine System Diseases	0.977	Kinase	GCK	CURATED	2645	DTO_03300101	2019	0.808	C3888631	P35557	Disease or Syndrome	Monogenic diabetes	C18;C19	0.5	2002	0.523
phenotype	0.030057		Neoplasms	1	Signaling	GH1	CURATED	2688	DTO_05007599	2007	0.923	C0024668	P01241	Neoplastic Process; Experimental Model of Disease	Mammary Neoplasms, Experimental	C04	0.5	1984	0.373
disease	0.030057		Congenital, Hereditary, and Neonatal Diseases and Abnormalities; Musculoskeletal Diseases; Nervous System Diseases; Endocrine System Diseases	0.958	Signaling	GH1	CURATED	2688	DTO_05007599	2020	0.923	C0271561	P01241	Disease or Syndrome	Somatotropin deficiency	C16;C05;C10;C19	0.5	1984	0.373
disease	0.030057			0.952	Signaling	GH1	CURATED	2688	DTO_05007599	2020	0.923	C3714796	P01241	Disease or Syndrome	Isolated somatotropin deficiency		0.5	1982	0.373
disease	3.5945e-19		Pathological Conditions, Signs and Symptoms; Digestive System Diseases	1	Enzyme	GPT	CURATED	2875	DTO_05007624	2012	0.923	C0023893	P24298	Experimental Model of Disease	Liver Cirrhosis, Experimental	C23;C06	0.5	2006	0.403
disease	3.5945e-19		Digestive System Diseases; Chemically-Induced Disorders	1	Enzyme	GPT	CURATED	2875	DTO_05007624	2016	0.923	C4277682	P24298	Disease or Syndrome	Chemical and Drug Induced Liver Injury	C06;C25	0.5	1977	0.403
disease	0.65372		Digestive System Diseases	1	Kinase	JAK2	CURATED	3717	DTO_03300101	2018	0.885	C0010346	O60674	Disease or Syndrome	Crohn Disease	C06	0.5	2008	0.385
disease	0.65372		Neoplasms; Hemic and Lymphatic Diseases	0.976	Kinase	JAK2	CURATED	3717	DTO_03300101	2019	0.885	C0023473	O60674	Neoplastic Process	Myeloid Leukemia, Chronic	C04;C15	0.5	1997	0.385
disease	0.65372		Pathological Conditions, Signs and Symptoms; Digestive System Diseases	1	Kinase	JAK2	CURATED	3717	DTO_03300101	2014	0.885	C0023893	O60674	Experimental Model of Disease	Liver Cirrhosis, Experimental	C23;C06	0.5	2014	0.385
group	0.65372		Hemic and Lymphatic Diseases	0.975	Kinase	JAK2	CURATED	3717	DTO_03300101	2020	0.885	C0027022	O60674	Neoplastic Process	Myeloproliferative disease	C15	0.5	2005	0.385
disease	0.65372		Hemic and Lymphatic Diseases	0.947	Kinase	JAK2	CURATED	3717	DTO_03300101	2019	0.885	C0032461	O60674	Disease or Syndrome	Polycythemia	C15	0.5	2005	0.385
group	0.65372		Neoplasms; Hemic and Lymphatic Diseases	0.969	Kinase	JAK2	CURATED	3717	DTO_03300101	2019	0.885	C0376545	O60674	Neoplastic Process	Hematologic Neoplasms	C04;C15	0.5	2005	0.385
disease	0.65372		Hemic and Lymphatic Diseases	1	Kinase	JAK2	CURATED	3717	DTO_03300101	2019	0.885	C0836924	O60674	Disease or Syndrome	Thrombocytosis	C15	0.5	2006	0.385
disease	9.841e-24		Cardiovascular Diseases	0.967		LDLR	CURATED	3949		2020	0.885	C0010068	P01130	Disease or Syndrome	Coronary heart disease	C14	0.5	1986	0.449
disease	9.841e-24		Nutritional and Metabolic Diseases	1		LDLR	CURATED	3949		2020	0.885	C0020473	P01130	Disease or Syndrome	Hyperlipidemia	C18	0.5	1990	0.449
disease	9.841e-24		Cardiovascular Diseases	0.989		LDLR	CURATED	3949		2020	0.885	C1956346	P01130	Disease or Syndrome	Coronary Artery Disease	C14	0.5	1986	0.449
disease	3.2764e-07		Nutritional and Metabolic Diseases	1	Enzyme	LIPC	CURATED	3990	DTO_05007624	2003	0.654	C0020473	P11150	Disease or Syndrome	Hyperlipidemia	C18	0.5	1991	0.585
disease	3.2764e-07		Nutritional and Metabolic Diseases	1	Enzyme	LIPC	CURATED	3990	DTO_05007624	2008	0.654	C0020476	P11150	Disease or Syndrome	Hyperlipoproteinemias	C18	0.5	1984	0.585
group	6.5917e-89		Cardiovascular Diseases	0.964	Enzyme	LPA	CURATED	4018	DTO_05007624	2020	0.769	C0007222	P08519	Disease or Syndrome	Cardiovascular Diseases	C14	0.5	1995	0.444
disease	6.5917e-89		Cardiovascular Diseases	0.968	Enzyme	LPA	CURATED	4018	DTO_05007624	2019	0.769	C0010068	P08519	Disease or Syndrome	Coronary heart disease	C14	0.5	1988	0.444
group	6.5917e-89		Nervous System Diseases; Cardiovascular Diseases	1	Enzyme	LPA	CURATED	4018	DTO_05007624	2019	0.769	C0038454	P08519	Disease or Syndrome	Cerebrovascular accident	C10;C14	0.5	1989	0.444
phenotype	6.5917e-89		Cardiovascular Diseases	1	Enzyme	LPA	CURATED	4018	DTO_05007624	1997	0.769	C0040038	P08519	Pathologic Function	Thromboembolism	C14	0.5	1997	0.444
disease	6.5917e-89		Cardiovascular Diseases	0.958	Enzyme	LPA	CURATED	4018	DTO_05007624	2019	0.769	C1956346	P08519	Disease or Syndrome	Coronary Artery Disease	C14	0.5	1988	0.444
disease	1.2712e-09		Digestive System Diseases	1	Enzyme	LPL	CURATED	4023	DTO_05007624	2020	0.808	C0030305	P06858	Disease or Syndrome	Pancreatitis	C06	0.5	1996	0.474
disease	0.5503		Neoplasms	1	Kinase	DDR2	CURATED	4921	DTO_03300101	2018	0.769	C0007137	Q16832	Neoplastic Process	Squamous cell carcinoma	C04	0.5	2008	0.541
phenotype	3.2764e-07		Cardiovascular Diseases	1	Enzyme	LIPC	CURATED	3990	DTO_05007624	2006	0.654	C0333233	P11150	Pathologic Function	Active Hyperemia	C14	0.3	2006	0.585
disease	0.15499		Nutritional and Metabolic Diseases; Endocrine System Diseases	1	Enzyme	SOD2	CURATED	6648	DTO_05007624	2013	0.923	C0011853	P04179	Experimental Model of Disease	Diabetes Mellitus, Experimental	C18;C19	0.5	2005	0.379
disease	0.15499		Pathological Conditions, Signs and Symptoms; Cardiovascular Diseases	1	Enzyme	SOD2	CURATED	6648	DTO_05007624	2013	0.923	C0035126	P04179	Injury or Poisoning	Reperfusion Injury	C23;C14	0.5	1993	0.379
disease	0.15499		Respiratory Tract Diseases	1	Enzyme	SOD2	CURATED	6648	DTO_05007624	2014	0.923	C0035222	P04179	Disease or Syndrome	Respiratory Distress Syndrome, Adult	C08	0.5	2014	0.379
disease	0.00093892		Digestive System Diseases; Chemically-Induced Disorders	1	Nuclear receptor	NR1H4	CURATED	9971	DTO_00102000	2018	0.808	C4277682	Q96RI1	Disease or Syndrome	Chemical and Drug Induced Liver Injury	C06;C25	0.5	2003	0.513
group	1.1086e-21		Musculoskeletal Diseases; Nervous System Diseases	0.938	Transporter	SLCO1B1	CURATED	10599	DTO_05007405	2019	0.731	C0026848	Q9Y6L6	Disease or Syndrome	Myopathy	C05;C10	0.5	2004	0.538
disease	1	strong		1	Kinase	SIK3	CURATED	23387	DTO_03300101	2018	0.654	C4748455	Q9Y2K2	Disease or Syndrome	SPONDYLOEPIMETAPHYSEAL DYSPLASIA, KRAKOW TYPE		0.5	2012	0.631
disease	3.2577e-06		Pathological Conditions, Signs and Symptoms; Congenital, Hereditary, and Neonatal Diseases and Abnormalities	0.971		UGT1A1	CURATED	54658		2019	0.769	C0857007	P22309	Disease or Syndrome	Hyperbilirubinemia, Neonatal	C23;C16	0.5	1999	0.464
group	0.96452		Digestive System Diseases	0.974		ATG16L1	CURATED	55054		2020	0.769	C0021390	Q676U5	Disease or Syndrome	Inflammatory Bowel Diseases	C06	0.5	2007	0.543
disease	6.9451e-10		Pathological Conditions, Signs and Symptoms	0.958	Transporter	SLC2A9	CURATED	56606	DTO_05007405	2020	0.731	C0740394	Q9NRM0	Disease or Syndrome	Hyperuricemia	C23	0.5	2008	0.619
disease	1		Neoplasms; Skin and Connective Tissue Diseases	NA		ARID1B	CURATED	57492		NA	0.846	C0006142	Q8NFD5	Neoplastic Process	Malignant neoplasm of breast	C04;C17	0.5	NA	0.503
group	4.5964e-29		Nervous System Diseases	0.917	Ion channel	TRPM8	CURATED	79054	DTO_01300327	2019	0.808	C0149931	Q7Z2W7	Disease or Syndrome	Migraine Disorders	C10	0.5	2011	0.553
disease	1.1608e-12		Congenital, Hereditary, and Neonatal Diseases and Abnormalities; Musculoskeletal Diseases; Nervous System Diseases	1		TMEM43	CURATED	79188		2011	0.462	C0410190	Q9BTV4	Disease or Syndrome	Autosomal Dominant Emery-Dreifuss Muscular Dystrophy (disorder)	C16;C05;C10	0.5	2011	0.653
disease	5.5765e-10		Cardiovascular Diseases	0.938		APOA5	CURATED	116519		2019	0.615	C1956346	Q6Q788	Disease or Syndrome	Coronary Artery Disease	C14	0.5	2001	0.587
disease	5.5765e-10		Congenital, Hereditary, and Neonatal Diseases and Abnormalities; Nutritional and Metabolic Diseases	1		APOA5	CURATED	116519		2018	0.615	C3489395	Q6Q788	Disease or Syndrome	Hyperchylomicronemia With Hyperprebetalipoproteinemia, Familial	C16;C18	0.5	2015	0.587
group	2.8542e-22	strong	Congenital, Hereditary, and Neonatal Diseases and Abnormalities; Musculoskeletal Diseases; Nervous System Diseases	1		ANO5	CURATED	203859		2019	0.538	C0686353	Q75V66	Disease or Syndrome	Muscular Dystrophies, Limb-Girdle	C16;C05;C10	0.5	2006	0.619
disease	2.7059e-17	strong	Congenital, Hereditary, and Neonatal Diseases and Abnormalities; Nutritional and Metabolic Diseases	0.977	Enzyme	PCSK9	CURATED	255738	DTO_05007624	2020	0.808	C0020445	Q8NBP7	Disease or Syndrome	Hypercholesterolemia, Familial	C16;C18	0.5	2003	0.482
disease	2.7059e-17		Cardiovascular Diseases	0.987	Enzyme	PCSK9	CURATED	255738	DTO_05007624	2020	0.808	C1956346	Q8NBP7	Disease or Syndrome	Coronary Artery Disease	C14	0.5	2006	0.482
disease	0.99998		Neoplasms; Hemic and Lymphatic Diseases	1	Kinase	JAK1	CURATED	3716	DTO_03300101	2020	0.769	C0032463	P23458	Neoplastic Process	Polycythemia Vera	C04;C15	0.49	2005	0.474
disease	0.5503		Neoplasms; Respiratory Tract Diseases	1	Kinase	DDR2	CURATED	4921	DTO_03300101	2019	0.769	C0149782	Q16832	Neoplastic Process	Squamous cell carcinoma of lung	C04;C08	0.49	2011	0.541
disease	0.00091697		Nutritional and Metabolic Diseases	1	G-protein coupled receptor	MC4R	CURATED	4160	DTO_02300001	2017	0.692	C0020459	P32245	Disease or Syndrome	Hyperinsulinism	C18	0.48	2004	0.535
disease	7.7723e-10		Neoplasms; Male Urogenital Diseases	1	Transporter	SLC22A3	CURATED	6581	DTO_05007405	2020	0.846	C0376358	O75751	Neoplastic Process	Malignant neoplasm of prostate	C04;C12	0.47	2007	0.531
disease	0.010024		Nutritional and Metabolic Diseases	1		APOC3	CURATED	345		2019	0.731	C0020443	P02656	Disease or Syndrome	Hypercholesterolemia	C18	0.46	2001	0.531
disease	0.046698		Digestive System Diseases	0.667	G-protein coupled receptor	CASR	CURATED	846	DTO_02300001	2014	0.846	C0030305	P41180	Disease or Syndrome	Pancreatitis	C06	0.46	1996	0.41
disease	1.1892e-23		Nutritional and Metabolic Diseases	1		CETP	CURATED	1071		2020	0.731	C0020473	P11597	Disease or Syndrome	Hyperlipidemia	C18	0.46	1994	0.512
disease	0.0039011	limited	Nervous System Diseases; Mental Disorders	1		CST3	CURATED	1471		2019	0.808	C0497327	P01034	Mental or Behavioral Dysfunction	Dementia	C10;F03	0.46	1996	0.436
disease	1.6432e-05		Neoplasms; Female Urogenital Diseases and Pregnancy Complications	1	Kinase	FGFR3	CURATED	2261	DTO_03300101	2019	0.846	C0302592	P22607	Neoplastic Process	Cervix carcinoma	C04;C13	0.46	2001	0.391
phenotype	0.65372		Cardiovascular Diseases	1	Kinase	JAK2	CURATED	3717	DTO_03300101	2010	0.885	C0042487	O60674	Pathologic Function	Venous Thrombosis	C14	0.46	2007	0.385
disease	0.65372		Hemic and Lymphatic Diseases	0.833	Kinase	JAK2	CURATED	3717	DTO_03300101	2016	0.885	C4551637	O60674	Disease or Syndrome	Erythrocytosis familial, 1	C15	0.46	1999	0.385
disease	3.4212e-10		Congenital, Hereditary, and Neonatal Diseases and Abnormalities; Nutritional and Metabolic Diseases; Female Urogenital Diseases and Pregnancy Complications; Male Urogenital Diseases; Endocrine System Diseases	0.857		POR	CURATED	5447		2016	0.769	C0001627	P16435	Disease or Syndrome	Congenital adrenal hyperplasia	C16;C18;C13;C12;C19	0.46	2004	0.502
disease	0.00010289		Nutritional and Metabolic Diseases; Immune System Diseases; Endocrine System Diseases	1		SH2B3	CURATED	10019		2018	0.692	C0011854	Q9UQQ2	Disease or Syndrome	Diabetes Mellitus, Insulin-Dependent	C18;C20;C19	0.46	2008	0.527
disease	0.00010289		Cardiovascular Diseases	1		SH2B3	CURATED	10019		2018	0.692	C1956346	Q9UQQ2	Disease or Syndrome	Coronary Artery Disease	C14	0.46	2011	0.527
disease	3.081e-21	strong	Nutritional and Metabolic Diseases	1	Transporter	ABCG5	CURATED	64240	DTO_05007405	2019	0.577	C0020443	Q9H222	Disease or Syndrome	Hypercholesterolemia	C18	0.46	2004	0.592
phenotype	0.0003636		Pathological Conditions, Signs and Symptoms; Nervous System Diseases	1	Enzyme	ALPL	CURATED	249	DTO_05007624	2016	0.769	C0036572	P05186	Sign or Symptom	Seizures	C23;C10	0.45	1995	0.546
disease	2.0908e-15		Neoplasms; Immune System Diseases; Hemic and Lymphatic Diseases; Cardiovascular Diseases	1		TNFRSF13B	CURATED	23495		2019	0.769	C0026764	O14836	Neoplastic Process	Multiple Myeloma	C04;C20;C15;C14	0.45	2004	0.558
disease	0.0018685		Female Urogenital Diseases and Pregnancy Complications; Male Urogenital Diseases	0.8		APOE	CURATED	348		2019	0.962	C1565489	P02649	Disease or Syndrome	Renal Insufficiency	C13;C12	0.44	2006	0.338
disease	2.5e-06		Digestive System Diseases; Infections	1	Immune response	HLA-DPA1	CURATED	3113	DTO_05007608	2015	0.846	C0524909	P20036	Disease or Syndrome	Hepatitis B, Chronic	C06;C01	0.44	2009	0.552
disease	0.96926		Nervous System Diseases; Mental Disorders	1		NECTIN2	CURATED	5819		2019	0.769	C0002395	Q92692	Disease or Syndrome	Alzheimer's Disease	C10;F03	0.44	2008	0.575
disease	3.2577e-06		Pathological Conditions, Signs and Symptoms; Congenital, Hereditary, and Neonatal Diseases and Abnormalities; Nutritional and Metabolic Diseases; Immune System Diseases; Nervous System Diseases; Hemic and Lymphatic Diseases	0.8		UGT1A1	CURATED	54658		2019	0.769	C0022610	P22309	Disease or Syndrome	Kernicterus	C23;C16;C18;C20;C10;C15	0.44	2001	0.464
disease	0.99998		Neoplasms	1	Kinase	JAK1	CURATED	3716	DTO_03300101	2018	0.769	C0023467	P23458	Neoplastic Process	Leukemia, Myelocytic, Acute	C04	0.43	2008	0.474
disease	9.841e-24		Digestive System Diseases	1		LDLR	CURATED	3949		2019	0.885	C2711227	P01130	Disease or Syndrome	Steatohepatitis	C06	0.43	2011	0.449
disease	1.6432e-05		Congenital, Hereditary, and Neonatal Diseases and Abnormalities; Musculoskeletal Diseases	1	Kinase	FGFR3	CURATED	2261	DTO_03300101	2001	0.846	C0265529	P22607	Congenital Abnormality	Plagiocephaly	C16;C05	0.42	1998	0.391
disease	0.072171		Nutritional and Metabolic Diseases; Endocrine System Diseases	1	Enzyme	DGKD	CURATED	8527	DTO_05007624	2019	0.346	C0011860	Q16760	Disease or Syndrome	Diabetes Mellitus, Non-Insulin-Dependent	C18;C19	0.42	2008	0.78
disease	0.00010289		Pathological Conditions, Signs and Symptoms; Cardiovascular Diseases	1		SH2B3	CURATED	10019		2019	0.692	C0027051	Q9UQQ2	Disease or Syndrome	Myocardial Infarction	C23;C14	0.42	2009	0.527
disease	3.081e-21		Cardiovascular Diseases	1	Transporter	ABCG5	CURATED	64240	DTO_05007405	2018	0.577	C0010068	Q9H222	Disease or Syndrome	Coronary heart disease	C14	0.42	2009	0.592
group	1.1608e-12		Cardiovascular Diseases	1		TMEM43	CURATED	79188		2019	0.462	C0878544	Q9BTV4	Disease or Syndrome	Cardiomyopathies	C14	0.42	2013	0.653
disease	1.6432e-05		Congenital, Hereditary, and Neonatal Diseases and Abnormalities; Musculoskeletal Diseases	1	Kinase	FGFR3	CURATED	2261	DTO_03300101	2015	0.846	C0175699	P22607	Disease or Syndrome	Saethre-Chotzen Syndrome	C16;C05	0.41	2015	0.391
disease	1.6432e-05		Congenital, Hereditary, and Neonatal Diseases and Abnormalities; Musculoskeletal Diseases	1	Kinase	FGFR3	CURATED	2261	DTO_03300101	2002	0.846	C0221356	P22607	Congenital Abnormality	Brachycephaly	C16;C05	0.41	2000	0.391
phenotype	1.6432e-05		Pathological Conditions, Signs and Symptoms; Nervous System Diseases; Otorhinolaryngologic Diseases	1	Kinase	FGFR3	CURATED	2261	DTO_03300101	2015	0.846	C1384666	P22607	Disease or Syndrome	hearing impairment	C23;C10;C09	0.41	2015	0.391
group	1.0376e-19		Congenital, Hereditary, and Neonatal Diseases and Abnormalities; Musculoskeletal Diseases	1	Enzyme modulator	HSPG2	CURATED	3339	DTO_05007584	2002	0.885	C0029422	P98160	Disease or Syndrome	Osteochondrodysplasias	C16;C05	0.41	1999	0.438
phenotype	0.65372		Cardiovascular Diseases	1	Kinase	JAK2	CURATED	3717	DTO_03300101	2009	0.885	C0040038	O60674	Pathologic Function	Thromboembolism	C14	0.41	2009	0.385
disease	0.99999		Pathological Conditions, Signs and Symptoms; Nervous System Diseases; Otorhinolaryngologic Diseases	1		LRP2	CURATED	4036		2014	0.846	C0018784	P98164	Disease or Syndrome	Sensorineural Hearing Loss (disorder)	C23;C10;C09	0.41	2007	0.491
group	0.99999	strong	Pathological Conditions, Signs and Symptoms; Nervous System Diseases; Mental Disorders; Behavior and Behavior Mechanisms	1		LRP2	CURATED	4036		2016	0.846	C3714756	P98164	Mental or Behavioral Dysfunction	Intellectual Disability	C23;C10;F03;F01	0.41	2012	0.491
group	0.00010289		Nervous System Diseases; Cardiovascular Diseases	1		SH2B3	CURATED	10019		2018	0.692	C0038454	Q9UQQ2	Disease or Syndrome	Cerebrovascular accident	C10;C14	0.41	2012	0.527
group	0.00010289		Hemic and Lymphatic Diseases	1		SH2B3	CURATED	10019		2019	0.692	C3463824	Q9UQQ2	Neoplastic Process	MYELODYSPLASTIC SYNDROME	C15	0.41	2019	0.527
disease	3.081e-21		Cardiovascular Diseases	1	Transporter	ABCG5	CURATED	64240	DTO_05007405	2014	0.577	C0010054	Q9H222	Disease or Syndrome	Coronary Arteriosclerosis	C14	0.41	2000	0.592
disease	0.64329		Nervous System Diseases; Cardiovascular Diseases	1	Transporter	ALB	CURATED	213	DTO_05007405	2018	0.962	C0751956	P02768	Disease or Syndrome	Acute Cerebrovascular Accidents	C10;C14	0.33	2003	0.317
disease	0.00054909		Nervous System Diseases; Cardiovascular Diseases	1		APOA1	CURATED	335		2009	0.885	C0751956	P02647	Disease or Syndrome	Acute Cerebrovascular Accidents	C10;C14	0.3	2009	0.429
disease	6.5917e-89		Nervous System Diseases; Cardiovascular Diseases	1	Enzyme	LPA	CURATED	4018	DTO_05007624	1999	0.769	C0751956	P08519	Disease or Syndrome	Acute Cerebrovascular Accidents	C10;C14	0.3	1999	0.444
disease	0.00010289		Nervous System Diseases; Cardiovascular Diseases	1		SH2B3	CURATED	10019		2018	0.692	C0751956	Q9UQQ2	Disease or Syndrome	Acute Cerebrovascular Accidents	C10;C14	0.3	2018	0.527
disease	4.5964e-29		Nervous System Diseases	1	Ion channel	TRPM8	CURATED	79054	DTO_01300327	2011	0.808	C0521664	Q7Z2W7	Disease or Syndrome	Acute Confusional Migraine	C10	0.3	2011	0.553
disease	0.0018685		Nervous System Diseases; Mental Disorders	1		APOE	CURATED	348		2018	0.962	C0546126	P02649	Mental or Behavioral Dysfunction	Acute Confusional Senile Dementia	C10;F03	0.3	1993	0.338
disease	0.0039011		Nervous System Diseases; Mental Disorders	1		CST3	CURATED	1471		2007	0.808	C0546126	P01034	Mental or Behavioral Dysfunction	Acute Confusional Senile Dementia	C10;F03	0.3	2007	0.436
disease	1		Nervous System Diseases; Mental Disorders	1	Receptor	IGF2R	CURATED	3482	DTO_05007575	2005	0.731	C0546126	P11717	Mental or Behavioral Dysfunction	Acute Confusional Senile Dementia	C10;F03	0.3	2005	0.518
disease	0.96926		Nervous System Diseases; Mental Disorders	1		NECTIN2	CURATED	5819		2018	0.769	C0546126	Q92692	Mental or Behavioral Dysfunction	Acute Confusional Senile Dementia	C10;F03	0.3	2018	0.575
disease	0.15499		Nervous System Diseases; Mental Disorders	1	Enzyme	SOD2	CURATED	6648	DTO_05007624	2009	0.923	C0546126	P04179	Mental or Behavioral Dysfunction	Acute Confusional Senile Dementia	C10;F03	0.3	2009	0.379
disease	0.17259		Nervous System Diseases; Mental Disorders	1		TFAM	CURATED	7019		2007	0.731	C0546126	Q00059	Mental or Behavioral Dysfunction	Acute Confusional Senile Dementia	C10;F03	0.3	2007	0.529
disease	0.0036969		Cardiovascular Diseases	1		CRP	CURATED	1401		2020	0.962	C0948089	P02741	Disease or Syndrome	Acute Coronary Syndrome	C14	0.4	2004	0.299
disease	0.15499		Cardiovascular Diseases	1	Enzyme	SOD2	CURATED	6648	DTO_05007624	2011	0.923	C0948089	P04179	Disease or Syndrome	Acute Coronary Syndrome	C14	0.3	2011	0.379
disease	1.6891e-13		Female Urogenital Diseases and Pregnancy Complications; Male Urogenital Diseases	1	Transporter	SLC22A12	CURATED	116085	DTO_05007405	2003	0.538	C2609414	Q96S37	Injury or Poisoning	Acute kidney injury	C13;C12	0.4	2003	0.647
disease	0.64329		Female Urogenital Diseases and Pregnancy Complications; Male Urogenital Diseases	1	Transporter	ALB	CURATED	213	DTO_05007405	2017	0.962	C2609414	P02768	Injury or Poisoning	Acute kidney injury	C13;C12	0.3	1991	0.317
disease	0.0039011		Female Urogenital Diseases and Pregnancy Complications; Male Urogenital Diseases	1		CST3	CURATED	1471		2017	0.808	C2609414	P01034	Injury or Poisoning	Acute kidney injury	C13;C12	0.3	2011	0.436
disease	0.99999		Female Urogenital Diseases and Pregnancy Complications; Male Urogenital Diseases	1		LRP2	CURATED	4036		2018	0.846	C2609414	P98164	Injury or Poisoning	Acute kidney injury	C13;C12	0.3	2018	0.491
disease	0.010345		Female Urogenital Diseases and Pregnancy Complications; Male Urogenital Diseases	1	Enzyme	PLG	CURATED	5340	DTO_05007624	2017	0.923	C2609414	P00747	Injury or Poisoning	Acute kidney injury	C13;C12	0.3	2017	0.389
disease	5.3634e-08		Female Urogenital Diseases and Pregnancy Complications; Male Urogenital Diseases	1		UGT1A9	CURATED	54600		2011	0.577	C2609414	O60656	Injury or Poisoning	Acute kidney injury	C13;C12	0.3	2011	0.59
disease	3.2577e-06		Female Urogenital Diseases and Pregnancy Complications; Male Urogenital Diseases	1		UGT1A1	CURATED	54658		1985	0.769	C2609414	P22309	Injury or Poisoning	Acute kidney injury	C13;C12	0.3	1985	0.464
disease	0.64329		Female Urogenital Diseases and Pregnancy Complications; Male Urogenital Diseases	1	Transporter	ALB	CURATED	213	DTO_05007405	2017	0.962	C1565662	P02768	Disease or Syndrome	Acute Kidney Insufficiency	C13;C12	0.3	1991	0.317
disease	0.0039011		Female Urogenital Diseases and Pregnancy Complications; Male Urogenital Diseases	1		CST3	CURATED	1471		2017	0.808	C1565662	P01034	Disease or Syndrome	Acute Kidney Insufficiency	C13;C12	0.3	2011	0.436
disease	0.99999		Female Urogenital Diseases and Pregnancy Complications; Male Urogenital Diseases	1		LRP2	CURATED	4036		2018	0.846	C1565662	P98164	Disease or Syndrome	Acute Kidney Insufficiency	C13;C12	0.3	2018	0.491
disease	0.010345		Female Urogenital Diseases and Pregnancy Complications; Male Urogenital Diseases	1	Enzyme	PLG	CURATED	5340	DTO_05007624	2017	0.923	C1565662	P00747	Disease or Syndrome	Acute Kidney Insufficiency	C13;C12	0.3	2017	0.389
disease	5.3634e-08		Female Urogenital Diseases and Pregnancy Complications; Male Urogenital Diseases	1		UGT1A9	CURATED	54600		2011	0.577	C1565662	O60656	Disease or Syndrome	Acute Kidney Insufficiency	C13;C12	0.3	2011	0.59
disease	3.2577e-06		Female Urogenital Diseases and Pregnancy Complications; Male Urogenital Diseases	1		UGT1A1	CURATED	54658		1985	0.769	C1565662	P22309	Disease or Syndrome	Acute Kidney Insufficiency	C13;C12	0.3	1985	0.464
disease	1.6891e-13		Female Urogenital Diseases and Pregnancy Complications; Male Urogenital Diseases	1	Transporter	SLC22A12	CURATED	116085	DTO_05007405	2003	0.538	C1565662	Q96S37	Disease or Syndrome	Acute Kidney Insufficiency	C13;C12	0.3	2003	0.647
disease	0.030182		Female Urogenital Diseases and Pregnancy Complications; Male Urogenital Diseases	1	Nuclear receptor	PPARA	CURATED	5465	DTO_00102000	2009	0.885	C0022672	Q07869	Disease or Syndrome	Acute Kidney Tubular Necrosis	C13;C12	0.31	2003	0.432
disease	0.15499		Female Urogenital Diseases and Pregnancy Complications; Male Urogenital Diseases	1	Enzyme	SOD2	CURATED	6648	DTO_05007624	2009	0.923	C0022672	P04179	Disease or Syndrome	Acute Kidney Tubular Necrosis	C13;C12	0.3	2009	0.379
disease	0.00054909		Respiratory Tract Diseases	1		APOA1	CURATED	335		2011	0.885	C0242488	P02647	Injury or Poisoning	Acute Lung Injury	C08	0.3	2011	0.429
disease	0.00010289	moderate	Neoplasms; Immune System Diseases; Hemic and Lymphatic Diseases	1		SH2B3	CURATED	10019		2018	0.692	C0023449	Q9UQQ2	Neoplastic Process	Acute lymphocytic leukemia	C04;C20;C15	0.33	2013	0.527
disease	0.0039011		Neoplasms	1		CST3	CURATED	1471		2007	0.808	C1879321	P01034	Neoplastic Process	Acute Myeloid Leukemia (AML-M2)	C04	0.3	2007	0.436
disease	0.65372		Neoplasms	1	Kinase	JAK2	CURATED	3717	DTO_03300101	2006	0.885	C1879321	O60674	Neoplastic Process	Acute Myeloid Leukemia (AML-M2)	C04	0.3	2006	0.385
disease	0.96926		Neoplasms	1		NECTIN2	CURATED	5819		2018	0.769	C1879321	Q92692	Neoplastic Process	Acute Myeloid Leukemia (AML-M2)	C04	0.3	2018	0.575
disease	0.0039011		Neoplasms	1		CST3	CURATED	1471		2007	0.808	C0026998	P01034	Neoplastic Process	Acute Myeloid Leukemia, M1	C04	0.3	2007	0.436
disease	0.65372		Neoplasms	1	Kinase	JAK2	CURATED	3717	DTO_03300101	2006	0.885	C0026998	O60674	Neoplastic Process	Acute Myeloid Leukemia, M1	C04	0.3	2006	0.385
disease	0.96926		Neoplasms	1		NECTIN2	CURATED	5819		2018	0.769	C0026998	Q92692	Neoplastic Process	Acute Myeloid Leukemia, M1	C04	0.3	2018	0.575
disease	9.841e-24		Infections	1		LDLR	CURATED	3949		2006	0.885	C0519066	P01130	Disease or Syndrome	Acute Q fever	C01	0.3	2006	0.449
group	0.15499		Neoplasms	1	Enzyme	SOD2	CURATED	6648	DTO_05007624	2018	0.923	C0001418	P04179	Neoplastic Process	Adenocarcinoma	C04	0.37	2002	0.379
group	7.2668e-09		Neoplasms	1	Nuclear receptor	NR1I2	CURATED	8856	DTO_00102000	2018	0.846	C0001418	O75469	Neoplastic Process	Adenocarcinoma	C04	0.35	2003	0.418
group	0.00054909		Neoplasms	1		APOA1	CURATED	335		2004	0.885	C0001418	P02647	Neoplastic Process	Adenocarcinoma	C04	0.31	2003	0.429
group	0.0018685		Neoplasms	0.5		APOE	CURATED	348		2011	0.962	C0001418	P02649	Neoplastic Process	Adenocarcinoma	C04	0.31	2009	0.338
disease	0.15499		Neoplasms	1	Enzyme	SOD2	CURATED	6648	DTO_05007624	2017	0.923	C0152013	P04179	Neoplastic Process	Adenocarcinoma of lung (disorder)	C04	0.33	2009	0.379
disease	0.5503		Neoplasms	1	Kinase	DDR2	CURATED	4921	DTO_03300101	2015	0.769	C0152013	Q16832	Neoplastic Process	Adenocarcinoma of lung (disorder)	C04	0.31	2015	0.541
disease	0.64329		Neoplasms	1	Transporter	ALB	CURATED	213	DTO_05007405	2010	0.962	C0152013	P02768	Neoplastic Process	Adenocarcinoma of lung (disorder)	C04	0.3	2010	0.317
disease	0.00054909		Neoplasms	1		APOA1	CURATED	335		2010	0.885	C0152013	P02647	Neoplastic Process	Adenocarcinoma of lung (disorder)	C04	0.3	2010	0.429
disease	0.00054909		Neoplasms	1		APOA1	CURATED	335		2004	0.885	C0205641	P02647	Neoplastic Process	Adenocarcinoma, Basal Cell	C04	0.3	2004	0.429
disease	0.0018685		Neoplasms	1		APOE	CURATED	348		2011	0.962	C0205641	P02649	Neoplastic Process	Adenocarcinoma, Basal Cell	C04	0.3	2011	0.338
disease	0.15499		Neoplasms	1	Enzyme	SOD2	CURATED	6648	DTO_05007624	2003	0.923	C0205641	P04179	Neoplastic Process	Adenocarcinoma, Basal Cell	C04	0.3	2003	0.379
disease	7.2668e-09		Neoplasms	1	Nuclear receptor	NR1I2	CURATED	8856	DTO_00102000	2011	0.846	C0205641	O75469	Neoplastic Process	Adenocarcinoma, Basal Cell	C04	0.3	2011	0.418
disease	0.00054909		Neoplasms	1		APOA1	CURATED	335		2004	0.885	C0205642	P02647	Neoplastic Process	Adenocarcinoma, Oxyphilic	C04	0.3	2004	0.429
disease	0.0018685		Neoplasms	1		APOE	CURATED	348		2011	0.962	C0205642	P02649	Neoplastic Process	Adenocarcinoma, Oxyphilic	C04	0.3	2011	0.338
disease	0.15499		Neoplasms	1	Enzyme	SOD2	CURATED	6648	DTO_05007624	2003	0.923	C0205642	P04179	Neoplastic Process	Adenocarcinoma, Oxyphilic	C04	0.3	2003	0.379
disease	7.2668e-09		Neoplasms	1	Nuclear receptor	NR1I2	CURATED	8856	DTO_00102000	2011	0.846	C0205642	O75469	Neoplastic Process	Adenocarcinoma, Oxyphilic	C04	0.3	2011	0.418
disease	0.00054909		Neoplasms	1		APOA1	CURATED	335		2004	0.885	C0205645	P02647	Neoplastic Process	Adenocarcinoma, Tubular	C04	0.3	2004	0.429
disease	0.0018685		Neoplasms	1		APOE	CURATED	348		2011	0.962	C0205645	P02649	Neoplastic Process	Adenocarcinoma, Tubular	C04	0.3	2011	0.338
disease	0.15499		Neoplasms	1	Enzyme	SOD2	CURATED	6648	DTO_05007624	2003	0.923	C0205645	P04179	Neoplastic Process	Adenocarcinoma, Tubular	C04	0.3	2003	0.379
disease	7.2668e-09		Neoplasms	1	Nuclear receptor	NR1I2	CURATED	8856	DTO_00102000	2011	0.846	C0205645	O75469	Neoplastic Process	Adenocarcinoma, Tubular	C04	0.3	2011	0.418
disease	1.1586e-09		Neoplasms	1		PDZK1	CURATED	5174		2006	0.654	C0010606	Q5T2W1	Neoplastic Process	Adenoid Cystic Carcinoma	C04	0.3	2006	0.65
disease	0.15499		Congenital, Hereditary, and Neonatal Diseases and Abnormalities; Digestive System Diseases; Neoplasms	1	Enzyme	SOD2	CURATED	6648	DTO_05007624	2003	0.923	C0032580	P04179	Neoplastic Process	Adenomatous Polyposis Coli	C16;C06;C04	0.3	2003	0.379
phenotype	0.00054909		Pathological Conditions, Signs and Symptoms; Nutritional and Metabolic Diseases	1		APOA1	CURATED	335		2014	0.885	C4317171	P02647	Disease or Syndrome	Adolescent Obesity	C23;C18	0.3	2014	0.429
phenotype	1.1892e-23		Pathological Conditions, Signs and Symptoms; Nutritional and Metabolic Diseases	1		CETP	CURATED	1071		2014	0.731	C4317171	P11597	Disease or Syndrome	Adolescent Obesity	C23;C18	0.3	2014	0.512
phenotype	5.5765e-10		Pathological Conditions, Signs and Symptoms; Nutritional and Metabolic Diseases	1		APOA5	CURATED	116519		2014	0.615	C4317171	Q6Q788	Disease or Syndrome	Adolescent Obesity	C23;C18	0.3	2014	0.587
phenotype	0.00054909		Pathological Conditions, Signs and Symptoms; Nutritional and Metabolic Diseases	1		APOA1	CURATED	335		2014	0.885	C4704956	P02647	Finding	Adolescent Overweight	C23;C18	0.3	2014	0.429
phenotype	1.1892e-23		Pathological Conditions, Signs and Symptoms; Nutritional and Metabolic Diseases	1		CETP	CURATED	1071		2014	0.731	C4704956	P11597	Finding	Adolescent Overweight	C23;C18	0.3	2014	0.512
phenotype	5.5765e-10		Pathological Conditions, Signs and Symptoms; Nutritional and Metabolic Diseases	1		APOA5	CURATED	116519		2014	0.615	C4704956	Q6Q788	Finding	Adolescent Overweight	C23;C18	0.3	2014	0.587
disease	0.15499		Congenital, Hereditary, and Neonatal Diseases and Abnormalities; Nutritional and Metabolic Diseases; Nervous System Diseases; Endocrine System Diseases	1	Enzyme	SOD2	CURATED	6648	DTO_05007624	2016	0.923	C0162309	P04179	Disease or Syndrome	Adrenoleukodystrophy	C16;C18;C10;C19	0.32	2005	0.379
disease	0.15499		Congenital, Hereditary, and Neonatal Diseases and Abnormalities; Nutritional and Metabolic Diseases; Nervous System Diseases; Endocrine System Diseases	1	Enzyme	SOD2	CURATED	6648	DTO_05007624	2005	0.923	C1527231	P04179	Disease or Syndrome	Adrenomyeloneuropathy	C16;C18;C10;C19	0.3	2005	0.379
disease	0.65372		Neoplasms; Immune System Diseases; Hemic and Lymphatic Diseases	0.667	Kinase	JAK2	CURATED	3717	DTO_03300101	2016	0.885	C1332201	O60674	Neoplastic Process	Adult Diffuse Large B-Cell Lymphoma	C04;C20;C15	0.33	2007	0.385
disease	3.2577e-06		Neoplasms; Immune System Diseases; Hemic and Lymphatic Diseases	1		UGT1A1	CURATED	54658		2012	0.769	C0220597	P22309	Neoplastic Process	Adult Hodgkin Lymphoma	C04;C20;C15	0.32	2009	0.464
group	3.4212e-10		Pathological Conditions, Signs and Symptoms; Nervous System Diseases; Mental Disorders	1		POR	CURATED	5447		2012	0.769	C0751262	P16435	Mental or Behavioral Dysfunction	Adult Learning Disorders	C23;C10;F03	0.3	2012	0.502
disease	3.0504e-07		Nervous System Diseases	1	Enzyme	ALDH5A1	CURATED	7915	DTO_05007624	2007	0.462	C0752197	P51649	Disease or Syndrome	Adult-Onset Dystonias	C10	0.3	2007	0.619
disease	3.0504e-07		Nervous System Diseases	1	Enzyme	ALDH5A1	CURATED	7915	DTO_05007624	2007	0.462	C0752198	P51649	Disease or Syndrome	Adult-Onset Idiopathic Focal Dystonias	C10	0.3	2007	0.619
disease	3.0504e-07		Nervous System Diseases	1	Enzyme	ALDH5A1	CURATED	7915	DTO_05007624	2007	0.462	C0752199	P51649	Disease or Syndrome	Adult-Onset Idiopathic Torsion Dystonias	C10	0.3	2007	0.619
disease	0.99985		Nervous System Diseases; Mental Disorders; Occupational Diseases	1	Nuclear receptor	RORC	CURATED	6097	DTO_00102000	2014	0.769	C0751758	P51449	Disease or Syndrome	Advanced Sleep Phase Syndrome	C10;F03;C24	0.3	2014	0.576
phenotype	3.2577e-06	moderate		NA		UGT1A1	CURATED	54658		NA	0.769	C1879645	P22309	Finding	Adverse Event by CTCAE Category		0.3	NA	0.464
group	0.030182		Chemically-Induced Disorders	1	Nuclear receptor	PPARA	CURATED	5465	DTO_00102000	2010	0.885	C0041755	Q07869	Pathologic Function	Adverse reaction to drug	C25	0.3	2010	0.432
group	0.64329		Chemically-Induced Disorders	1	Transporter	ALB	CURATED	213	DTO_05007405	2017	0.962	C0041755	P02768	Pathologic Function	Adverse reaction to drug	C25	0.3	2014	0.317
group	0.0039011		Chemically-Induced Disorders	1		CST3	CURATED	1471		2017	0.808	C0041755	P01034	Pathologic Function	Adverse reaction to drug	C25	0.3	2017	0.436
group	0.010345		Chemically-Induced Disorders	1	Enzyme	PLG	CURATED	5340	DTO_05007624	2017	0.923	C0041755	P00747	Pathologic Function	Adverse reaction to drug	C25	0.3	2017	0.389
group	1.1086e-21		Chemically-Induced Disorders	1	Transporter	SLCO1B1	CURATED	10599	DTO_05007405	2011	0.731	C0041755	Q9Y6L6	Pathologic Function	Adverse reaction to drug	C25	0.3	2011	0.538
group	3.2577e-06		Chemically-Induced Disorders	1		UGT1A1	CURATED	54658		2010	0.769	C0041755	P22309	Pathologic Function	Adverse reaction to drug	C25	0.3	2010	0.464
disease	0.56616		Congenital, Hereditary, and Neonatal Diseases and Abnormalities; Hemic and Lymphatic Diseases	1	Signaling	FGB	CURATED	2244	DTO_05007599	2016	0.692	C0001733	P02675	Disease or Syndrome	Afibrinogenemia	C16;C15	0.36	2000	0.584
phenotype	0.15499		Pathological Conditions, Signs and Symptoms; Female Urogenital Diseases and Pregnancy Complications; Male Urogenital Diseases	1	Enzyme	SOD2	CURATED	6648	DTO_05007624	2007	0.923	C0001925	P04179	Finding	Albuminuria	C23;C13;C12	0.3	2007	0.379
disease	0.0018685		Chemically-Induced Disorders; Mental Disorders	1		APOE	CURATED	348		2018	0.962	C0085762	P02649	Mental or Behavioral Dysfunction	Alcohol abuse	C25;F03	0.32	2008	0.338
disease	9.841e-24		Chemically-Induced Disorders; Mental Disorders	1		LDLR	CURATED	3949		2006	0.885	C0085762	P01130	Mental or Behavioral Dysfunction	Alcohol abuse	C25;F03	0.31	2006	0.449
disease	1.2538e-06		Chemically-Induced Disorders; Mental Disorders	1		SHBG	CURATED	6462		2013	0.808	C0085762	P04278	Mental or Behavioral Dysfunction	Alcohol abuse	C25;F03	0.31	1996	0.438
disease	7.5307e-05		Chemically-Induced Disorders; Mental Disorders	1	Enzyme	GGT1	CURATED	2678	DTO_05007624	2003	0.885	C0085762	P19440	Mental or Behavioral Dysfunction	Alcohol abuse	C25;F03	0.3	2003	0.496
disease	9.934e-07		Chemically-Induced Disorders; Mental Disorders	0.958	Enzyme	ADH1B	CURATED	125	DTO_05007624	2019	0.846	C0001956	P00325	Mental or Behavioral Dysfunction	Alcohol Use Disorder	C25;F03	0.4	1994	0.502
disease	7.5307e-05		Chemically-Induced Disorders; Mental Disorders	1	Enzyme	GGT1	CURATED	2678	DTO_05007624	2003	0.885	C0001956	P19440	Mental or Behavioral Dysfunction	Alcohol Use Disorder	C25;F03	0.3	2003	0.496
disease	1.2538e-06		Chemically-Induced Disorders; Mental Disorders	1		SHBG	CURATED	6462		1996	0.808	C0001956	P04278	Mental or Behavioral Dysfunction	Alcohol Use Disorder	C25;F03	0.3	1996	0.438
disease	9.934e-07		Chemically-Induced Disorders; Mental Disorders	1	Enzyme	ADH1B	CURATED	125	DTO_05007624	2014	0.846	C0001969	P00325	Mental or Behavioral Dysfunction	Alcoholic Intoxication	C25;F03	0.31	2006	0.502
disease	0.15499		Chemically-Induced Disorders; Mental Disorders	1	Enzyme	SOD2	CURATED	6648	DTO_05007624	2013	0.923	C0001969	P04179	Mental or Behavioral Dysfunction	Alcoholic Intoxication	C25;F03	0.3	2013	0.379
disease	0.030057		Chemically-Induced Disorders; Mental Disorders	1	Signaling	GH1	CURATED	2688	DTO_05007599	2010	0.923	C0001973	P01241	Mental or Behavioral Dysfunction	Alcoholic Intoxication, Chronic	C25;F03	0.33	1991	0.373
disease	0.030182		Digestive System Diseases; Chemically-Induced Disorders	1	Nuclear receptor	PPARA	CURATED	5465	DTO_00102000	2008	0.885	C2718067	Q07869	Disease or Syndrome	Alcoholic Steatohepatitis	C06;C25	0.3	2008	0.432
phenotype	0.64329		Immune System Diseases	1	Transporter	ALB	CURATED	213	DTO_05007405	1993	0.962	C1527304	P02768	Pathologic Function	Allergic Reaction	C20	0.3	1993	0.317
disease	0.030182		Nutritional and Metabolic Diseases; Endocrine System Diseases	1	Nuclear receptor	PPARA	CURATED	5465	DTO_00102000	2013	0.885	C0002152	Q07869	Experimental Model of Disease	Alloxan Diabetes	C18;C19	0.3	2003	0.432
disease	0.63464		Nutritional and Metabolic Diseases; Endocrine System Diseases	1	Kinase	GCK	CURATED	2645	DTO_03300101	2005	0.808	C0002152	P35557	Experimental Model of Disease	Alloxan Diabetes	C18;C19	0.3	2005	0.523
disease	3.7625e-18		Nutritional and Metabolic Diseases; Endocrine System Diseases	1	Kinase	PFKM	CURATED	5213	DTO_03300101	2004	0.5	C0002152	P08237	Experimental Model of Disease	Alloxan Diabetes	C18;C19	0.3	2004	0.666
disease	0.15499		Nutritional and Metabolic Diseases; Endocrine System Diseases	1	Enzyme	SOD2	CURATED	6648	DTO_05007624	2013	0.923	C0002152	P04179	Experimental Model of Disease	Alloxan Diabetes	C18;C19	0.3	2005	0.379
disease	0.0003636		Musculoskeletal Diseases; Stomatognathic Diseases	1	Enzyme	ALPL	CURATED	249	DTO_05007624	2010	0.769	C0002382	P05186	Disease or Syndrome	Alveolar Bone Loss	C05;C07	0.3	2010	0.546
disease	0.0184		Respiratory Tract Diseases	1	Signaling	FGF2	CURATED	2247	DTO_05007599	1996	0.923	C4721507	P09038	Disease or Syndrome	Alveolitis, Fibrosing	C08	0.3	1996	0.383
disease	0.0018685		Nervous System Diseases; Mental Disorders	NA		APOE	CURATED	348		NA	0.962	C1847200	P02649	Disease or Syndrome	ALZHEIMER DISEASE 4	C10;F03	0.3	NA	0.338
disease	0.0039011		Nervous System Diseases; Mental Disorders	1		CST3	CURATED	1471		2007	0.808	C0750901	P01034	Disease or Syndrome	Alzheimer Disease, Early Onset	C10;F03	0.31	1993	0.436
disease	1		Nervous System Diseases; Mental Disorders	1	Receptor	IGF2R	CURATED	3482	DTO_05007575	2005	0.731	C0750901	P11717	Disease or Syndrome	Alzheimer Disease, Early Onset	C10;F03	0.3	2005	0.518
disease	0.96926		Nervous System Diseases; Mental Disorders	1		NECTIN2	CURATED	5819		2018	0.769	C0750901	Q92692	Disease or Syndrome	Alzheimer Disease, Early Onset	C10;F03	0.3	2018	0.575
disease	0.15499		Nervous System Diseases; Mental Disorders	1	Enzyme	SOD2	CURATED	6648	DTO_05007624	2009	0.923	C0750901	P04179	Disease or Syndrome	Alzheimer Disease, Early Onset	C10;F03	0.3	2009	0.379
disease	0.17259		Nervous System Diseases; Mental Disorders	1		TFAM	CURATED	7019		2007	0.731	C0750901	Q00059	Disease or Syndrome	Alzheimer Disease, Early Onset	C10;F03	0.3	2007	0.529
disease	0.0018685		Nervous System Diseases; Mental Disorders	0.956		APOE	CURATED	348		2020	0.962	C0494463	P02649	Mental or Behavioral Dysfunction	Alzheimer Disease, Late Onset	C10;F03	0.4	1993	0.338
disease	0.0039011		Nervous System Diseases; Mental Disorders	0.778		CST3	CURATED	1471		2009	0.808	C0494463	P01034	Mental or Behavioral Dysfunction	Alzheimer Disease, Late Onset	C10;F03	0.37	2000	0.436
disease	0.96926		Nervous System Diseases; Mental Disorders	1		NECTIN2	CURATED	5819		2018	0.769	C0494463	Q92692	Mental or Behavioral Dysfunction	Alzheimer Disease, Late Onset	C10;F03	0.33	2009	0.575
disease	0.17259		Nervous System Diseases; Mental Disorders	1		TFAM	CURATED	7019		2011	0.731	C0494463	Q00059	Mental or Behavioral Dysfunction	Alzheimer Disease, Late Onset	C10;F03	0.33	2007	0.529
disease	0.15499		Nervous System Diseases; Mental Disorders	1	Enzyme	SOD2	CURATED	6648	DTO_05007624	2016	0.923	C0494463	P04179	Mental or Behavioral Dysfunction	Alzheimer Disease, Late Onset	C10;F03	0.31	2009	0.379
disease	1		Nervous System Diseases; Mental Disorders	1	Receptor	IGF2R	CURATED	3482	DTO_05007575	2005	0.731	C0494463	P11717	Mental or Behavioral Dysfunction	Alzheimer Disease, Late Onset	C10;F03	0.3	2005	0.518
disease	0.0039011		Nervous System Diseases; Mental Disorders	0.935		CST3	CURATED	1471		2019	0.808	C0002395	P01034	Disease or Syndrome	Alzheimer's Disease	C10;F03	0.4	1988	0.436
disease	0.17259		Nervous System Diseases; Mental Disorders	0.9		TFAM	CURATED	7019		2019	0.731	C0002395	Q00059	Disease or Syndrome	Alzheimer's Disease	C10;F03	0.4	2004	0.529
disease	1		Nervous System Diseases; Mental Disorders	1	Receptor	IGF2R	CURATED	3482	DTO_05007575	2015	0.731	C0002395	P11717	Disease or Syndrome	Alzheimer's Disease	C10;F03	0.32	2004	0.518
disease	0.0018685		Nervous System Diseases; Mental Disorders	1		APOE	CURATED	348		2018	0.962	C0750900	P02649	Mental or Behavioral Dysfunction	Alzheimer's Disease, Focal Onset	C10;F03	0.3	1993	0.338
disease	0.0039011		Nervous System Diseases; Mental Disorders	1		CST3	CURATED	1471		2007	0.808	C0750900	P01034	Mental or Behavioral Dysfunction	Alzheimer's Disease, Focal Onset	C10;F03	0.3	2007	0.436
disease	1		Nervous System Diseases; Mental Disorders	1	Receptor	IGF2R	CURATED	3482	DTO_05007575	2005	0.731	C0750900	P11717	Mental or Behavioral Dysfunction	Alzheimer's Disease, Focal Onset	C10;F03	0.3	2005	0.518
disease	0.96926		Nervous System Diseases; Mental Disorders	1		NECTIN2	CURATED	5819		2018	0.769	C0750900	Q92692	Mental or Behavioral Dysfunction	Alzheimer's Disease, Focal Onset	C10;F03	0.3	2018	0.575
disease	0.15499		Nervous System Diseases; Mental Disorders	1	Enzyme	SOD2	CURATED	6648	DTO_05007624	2009	0.923	C0750900	P04179	Mental or Behavioral Dysfunction	Alzheimer's Disease, Focal Onset	C10;F03	0.3	2009	0.379
disease	0.17259		Nervous System Diseases; Mental Disorders	1		TFAM	CURATED	7019		2007	0.731	C0750900	Q00059	Mental or Behavioral Dysfunction	Alzheimer's Disease, Focal Onset	C10;F03	0.3	2007	0.529
phenotype	3.4212e-10		Pathological Conditions, Signs and Symptoms	1		POR	CURATED	5447		2004	0.769	C0002453	P16435	Finding	Amenorrhea	C23	0.3	2004	0.502
disease	0.0018685		Nutritional and Metabolic Diseases	0.955		APOE	CURATED	348		2020	0.962	C0002726	P02649	Disease or Syndrome	Amyloidosis	C18	0.4	1995	0.338
disease	0.010024	moderate	Nutritional and Metabolic Diseases	0		APOC3	CURATED	345		2016	0.731	C0002726	P02656	Disease or Syndrome	Amyloidosis	C18	0.31	2016	0.531
disease	0.15499		Nutritional and Metabolic Diseases; Nervous System Diseases	1	Enzyme	SOD2	CURATED	6648	DTO_05007624	2008	0.923	C0002736	P04179	Disease or Syndrome	Amyotrophic Lateral Sclerosis	C18;C10	0.35	1996	0.379
disease	0.0039011		Nutritional and Metabolic Diseases; Nervous System Diseases	1		CST3	CURATED	1471		2002	0.808	C1862939	P01034	Disease or Syndrome	AMYOTROPHIC LATERAL SCLEROSIS 1	C18;C10	0.3	2002	0.436
disease	9.841e-24		Nutritional and Metabolic Diseases; Nervous System Diseases	1		LDLR	CURATED	3949		2002	0.885	C1862939	P01130	Disease or Syndrome	AMYOTROPHIC LATERAL SCLEROSIS 1	C18;C10	0.3	2002	0.449
disease	1.9234e-16		Cardiovascular Diseases	0.96		APOB	CURATED	338		2019	0.808	C0010068	P04114	Disease or Syndrome	Coronary heart disease	C14	0.5	1986	0.453
disease	0.15499		Nutritional and Metabolic Diseases; Nervous System Diseases	1	Enzyme	SOD2	CURATED	6648	DTO_05007624	1996	0.923	C0393554	P04179	Disease or Syndrome	Amyotrophic Lateral Sclerosis With Dementia	C18;C10	0.3	1996	0.379
disease	0.0039011		Nutritional and Metabolic Diseases; Nervous System Diseases	1		CST3	CURATED	1471		2002	0.808	C4551993	P01034	Disease or Syndrome	Amyotrophic Lateral Sclerosis, Familial	C18;C10	0.3	2002	0.436
disease	9.841e-24		Nutritional and Metabolic Diseases; Nervous System Diseases	1		LDLR	CURATED	3949		2002	0.885	C4551993	P01130	Disease or Syndrome	Amyotrophic Lateral Sclerosis, Familial	C18;C10	0.3	2002	0.449
disease	0.15499		Nutritional and Metabolic Diseases; Nervous System Diseases	1	Enzyme	SOD2	CURATED	6648	DTO_05007624	1996	0.923	C0543859	P04179	Disease or Syndrome	Amyotrophic Lateral Sclerosis, Guam Form	C18;C10	0.3	1996	0.379
disease	0.0039011		Nutritional and Metabolic Diseases; Nervous System Diseases	1		CST3	CURATED	1471		2017	0.808	C1862941	P01034	Disease or Syndrome	Amyotrophic Lateral Sclerosis, Sporadic	C18;C10	0.31	2002	0.436
disease	9.841e-24		Nutritional and Metabolic Diseases; Nervous System Diseases	1		LDLR	CURATED	3949		2002	0.885	C1862941	P01130	Disease or Syndrome	Amyotrophic Lateral Sclerosis, Sporadic	C18;C10	0.3	2002	0.449
phenotype	0.64329			1	Transporter	ALB	CURATED	213	DTO_05007405	2005	0.962	C0878666	P02768	Finding	Analbuminemia		0.4	1994	0.317
disease	0.030182		Neoplasms	1	Nuclear receptor	PPARA	CURATED	5465	DTO_00102000	2000	0.885	C0205696	Q07869	Neoplastic Process	Anaplastic carcinoma	C04	0.3	2000	0.432
disease	0.066228		Neoplasms	1	Receptor	SCARB1	CURATED	949	DTO_05007575	2002	0.731	C0205696	Q8WTV0	Neoplastic Process	Anaplastic carcinoma	C04	0.3	2002	0.559
disease	0.73709		Neoplasms	1	Nucleic acid binding	EIF5A	CURATED	1984	DTO_05007557	2005	0.692	C0205696	P63241	Neoplastic Process	Anaplastic carcinoma	C04	0.3	2005	0.612
disease	7.5307e-05		Neoplasms	1	Enzyme	GGT1	CURATED	2678	DTO_05007624	2002	0.885	C0205696	P19440	Neoplastic Process	Anaplastic carcinoma	C04	0.3	2002	0.496
disease	1.2712e-09		Neoplasms	1	Enzyme	LPL	CURATED	4023	DTO_05007624	2002	0.808	C0205696	P06858	Neoplastic Process	Anaplastic carcinoma	C04	0.3	2002	0.474
disease	0.15499		Neoplasms	1	Enzyme	SOD2	CURATED	6648	DTO_05007624	2000	0.923	C0205696	P04179	Neoplastic Process	Anaplastic carcinoma	C04	0.3	2000	0.379
disease	0.17989		Neoplasms	1	Cellular structure	EZR	CURATED	7430	DTO_05007530	2002	0.808	C0205696	P15311	Neoplastic Process	Anaplastic carcinoma	C04	0.3	2002	0.476
disease	0.15499		Neoplasms	1	Enzyme	SOD2	CURATED	6648	DTO_05007624	2005	0.923	C0238461	P04179	Neoplastic Process	Anaplastic thyroid carcinoma	C04	0.3	2005	0.379
phenotype	0.00054909		Pathological Conditions, Signs and Symptoms	1		APOA1	CURATED	335		2011	0.885	C0151603	P02647	Pathologic Function	Anasarca	C23	0.3	2011	0.429
disease	0.15499		Hemic and Lymphatic Diseases	1	Enzyme	SOD2	CURATED	6648	DTO_05007624	2010	0.923	C0002871	P04179	Disease or Syndrome	Anemia	C15	0.31	2006	0.379
disease	1		Hemic and Lymphatic Diseases	1		SPTB	CURATED	6710		1997	0.462	C0002878	P11277	Disease or Syndrome	Anemia, Hemolytic	C15	0.4	1997	0.65
disease	1		Hemic and Lymphatic Diseases	1		SPTB	CURATED	6710		1997	0.462	C0002879	P11277	Disease or Syndrome	Anemia, Hemolytic, Acquired	C15	0.3	1997	0.65
disease	1		Pathological Conditions, Signs and Symptoms; Congenital, Hereditary, and Neonatal Diseases and Abnormalities; Hemic and Lymphatic Diseases	1		SPTB	CURATED	6710		2013	0.462	C0221409	P11277	Disease or Syndrome	Anemia, hereditary spherocytic hemolytic	C23;C16;C15	0.3	2013	0.65
disease	1		Hemic and Lymphatic Diseases	1		SPTB	CURATED	6710		1997	0.462	C0002889	P11277	Disease or Syndrome	Anemia, Microangiopathic	C15	0.3	1997	0.65
disease	1		Congenital, Hereditary, and Neonatal Diseases and Abnormalities; Hemic and Lymphatic Diseases	1		SPTB	CURATED	6710		1997	0.462	C0002891	P11277	Disease or Syndrome	Anemia, Neonatal	C16;C15	0.3	1997	0.65
disease	0.0039011		Neoplasms; Nervous System Diseases	1		CST3	CURATED	1471		2010	0.808	C1527197	P01034	Neoplastic Process	Angioblastic Meningioma	C04;C10	0.3	2010	0.436
phenotype	0.64329		Skin and Connective Tissue Diseases; Immune System Diseases; Cardiovascular Diseases	1	Transporter	ALB	CURATED	213	DTO_05007405	1993	0.962	C0002994	P02768	Pathologic Function	Angioedema	C17;C20;C14	0.3	1993	0.317
disease	0.0039011		Neoplasms; Nervous System Diseases	1		CST3	CURATED	1471		2010	0.808	C0334608	P01034	Neoplastic Process	Angiomatous Meningioma	C04;C10	0.3	2010	0.436
disease	0.00091697		Pathological Conditions, Signs and Symptoms; Nervous System Diseases; Behavior and Behavior Mechanisms	1	G-protein coupled receptor	MC4R	CURATED	4160	DTO_02300001	2012	0.692	C0178417	P32245	Mental or Behavioral Dysfunction	Anhedonia	C23;C10;F01	0.3	2012	0.535
phenotype	0.030182		Neoplasms; Animal Diseases	1	Nuclear receptor	PPARA	CURATED	5465	DTO_00102000	2000	0.885	C0024667	Q07869	Neoplastic Process	Animal Mammary Neoplasms	C04;C22	0.3	2000	0.432
phenotype	0.066228		Neoplasms; Animal Diseases	1	Receptor	SCARB1	CURATED	949	DTO_05007575	2002	0.731	C0024667	Q8WTV0	Neoplastic Process	Animal Mammary Neoplasms	C04;C22	0.3	2002	0.559
phenotype	0.73709		Neoplasms; Animal Diseases	1	Nucleic acid binding	EIF5A	CURATED	1984	DTO_05007557	2005	0.692	C0024667	P63241	Neoplastic Process	Animal Mammary Neoplasms	C04;C22	0.3	2005	0.612
phenotype	7.5307e-05		Neoplasms; Animal Diseases	1	Enzyme	GGT1	CURATED	2678	DTO_05007624	2002	0.885	C0024667	P19440	Neoplastic Process	Animal Mammary Neoplasms	C04;C22	0.3	2002	0.496
phenotype	1.2712e-09		Neoplasms; Animal Diseases	1	Enzyme	LPL	CURATED	4023	DTO_05007624	2002	0.808	C0024667	P06858	Neoplastic Process	Animal Mammary Neoplasms	C04;C22	0.3	2002	0.474
phenotype	0.17989		Neoplasms; Animal Diseases	1	Cellular structure	EZR	CURATED	7430	DTO_05007530	2002	0.808	C0024667	P15311	Neoplastic Process	Animal Mammary Neoplasms	C04;C22	0.3	2002	0.476
group	0.65372		Congenital, Hereditary, and Neonatal Diseases and Abnormalities; Digestive System Diseases	1	Kinase	JAK2	CURATED	3717	DTO_03300101	2013	0.885	C3495676	O60674	Anatomical Abnormality	Anorectal Malformations	C16;C06	0.3	2013	0.385
phenotype	0.00054909		Pathological Conditions, Signs and Symptoms	1		APOA1	CURATED	335		2008	0.885	C0003129	P02647	Sign or Symptom	Anoxemia	C23	0.3	2008	0.429
phenotype	0.15499		Pathological Conditions, Signs and Symptoms	1	Enzyme	SOD2	CURATED	6648	DTO_05007624	2009	0.923	C0003129	P04179	Sign or Symptom	Anoxemia	C23	0.3	2008	0.379
phenotype	0.00054909		Pathological Conditions, Signs and Symptoms	1		APOA1	CURATED	335		2008	0.885	C0003130	P02647	Pathologic Function	Anoxia	C23	0.3	2008	0.429
phenotype	0.15499		Pathological Conditions, Signs and Symptoms	1	Enzyme	SOD2	CURATED	6648	DTO_05007624	2009	0.923	C0003130	P04179	Pathologic Function	Anoxia	C23	0.3	2008	0.379
phenotype	0.0184		Pathological Conditions, Signs and Symptoms; Nervous System Diseases; Cardiovascular Diseases	1	Signaling	FGF2	CURATED	2247	DTO_05007599	2007	0.923	C0393953	P09038	Disease or Syndrome	Anterior Cerebral Circulation Infarction	C23;C10;C14	0.3	2007	0.383
phenotype	9.934e-07		Pathological Conditions, Signs and Symptoms; Nervous System Diseases; Cardiovascular Diseases	1	Enzyme	ADH1B	CURATED	125	DTO_05007624	2004	0.846	C0751012	P00325	Disease or Syndrome	Anterior Choroidal Artery Infarction	C23;C10;C14	0.3	2004	0.502
phenotype	0.0184		Pathological Conditions, Signs and Symptoms; Nervous System Diseases; Cardiovascular Diseases	1	Signaling	FGF2	CURATED	2247	DTO_05007599	2007	0.923	C0751952	P09038	Disease or Syndrome	Anterior Circulation Brain Infarction	C23;C10;C14	0.3	2007	0.383
disease	3.4212e-10		Congenital, Hereditary, and Neonatal Diseases and Abnormalities; Nutritional and Metabolic Diseases; Musculoskeletal Diseases	1		POR	CURATED	5447		2016	0.769	C2350233	P16435	Disease or Syndrome	Antley-Bixler Syndrome Phenotype	C16;C18;C05	0.32	2004	0.502
disease	3.4212e-10		Congenital, Hereditary, and Neonatal Diseases and Abnormalities; Nutritional and Metabolic Diseases; Musculoskeletal Diseases	1		POR	CURATED	5447		2016	0.769	C2936791	P16435	Disease or Syndrome	Antley-Bixler Syndrome, Autosomal Dominant	C16;C18;C05	0.35	2004	0.502
phenotype	0.64329		Female Urogenital Diseases and Pregnancy Complications; Male Urogenital Diseases	1	Transporter	ALB	CURATED	213	DTO_05007405	1984	0.962	C0003460	P02768	Disease or Syndrome	Anuria	C13;C12	0.3	1984	0.317
group	0.0036969		Mental Disorders	1		CRP	CURATED	1401		2019	0.962	C0003469	P02741	Mental or Behavioral Dysfunction	Anxiety Disorders	F03	0.4	2010	0.299
disease	0.0036969		Mental Disorders	1		CRP	CURATED	1401		2010	0.962	C1279420	P02741	Mental or Behavioral Dysfunction	Anxiety neurosis (finding)	F03	0.3	2010	0.299
disease	0.0036969		Mental Disorders	1		CRP	CURATED	1401		2010	0.962	C0376280	P02741	Mental or Behavioral Dysfunction	Anxiety States, Neurotic	F03	0.3	2010	0.299
group	0.15499		Cardiovascular Diseases	1	Enzyme	SOD2	CURATED	6648	DTO_05007624	2014	0.923	C0003493	P04179	Disease or Syndrome	Aortic Diseases	C14	0.3	2014	0.379
phenotype	1.4525e-13		Congenital, Hereditary, and Neonatal Diseases and Abnormalities; Nutritional and Metabolic Diseases	1	Transporter	ABCA1	CURATED	19	DTO_05007405	2012	0.846	C0342898	O95477	Pathologic Function	Apolipoprotein A-I deficiency	C16;C18	0.3	2004	0.467
phenotype	0.00054909		Congenital, Hereditary, and Neonatal Diseases and Abnormalities; Nutritional and Metabolic Diseases	1		APOA1	CURATED	335		1994	0.885	C0342898	P02647	Pathologic Function	Apolipoprotein A-I deficiency	C16;C18	0.3	1993	0.429
disease	1.2712e-09		Congenital, Hereditary, and Neonatal Diseases and Abnormalities; Nutritional and Metabolic Diseases	0.5	Enzyme	LPL	CURATED	4023	DTO_05007624	2007	0.808	C1720779	P06858	Disease or Syndrome	Apolipoprotein C-II Deficiency (disorder)	C16;C18	0.32	2001	0.474
disease	1.006e-05		Congenital, Hereditary, and Neonatal Diseases and Abnormalities; Musculoskeletal Diseases	1		NPR3	CURATED	4883		1999	0.615	C0003706	P17342	Congenital Abnormality	Arachnodactyly	C16;C05	0.3	1999	0.633
disease	0.0036969		Nervous System Diseases; Chemically-Induced Disorders	1		CRP	CURATED	1401		2012	0.962	C0751851	P02741	Disease or Syndrome	Arsenic Encephalopathy	C10;C25	0.3	2012	0.299
disease	0.15499		Nervous System Diseases; Chemically-Induced Disorders	1	Enzyme	SOD2	CURATED	6648	DTO_05007624	2006	0.923	C0751851	P04179	Disease or Syndrome	Arsenic Encephalopathy	C10;C25	0.3	2006	0.379
disease	0.0036969		Nervous System Diseases; Chemically-Induced Disorders	1		CRP	CURATED	1401		2012	0.962	C0751852	P02741	Injury or Poisoning	Arsenic Induced Polyneuropathy	C10;C25	0.3	2012	0.299
disease	0.15499		Nervous System Diseases; Chemically-Induced Disorders	1	Enzyme	SOD2	CURATED	6648	DTO_05007624	2006	0.923	C0751852	P04179	Injury or Poisoning	Arsenic Induced Polyneuropathy	C10;C25	0.3	2006	0.379
disease	0.0036969		Nervous System Diseases; Chemically-Induced Disorders	1		CRP	CURATED	1401		2012	0.962	C0311375	P02741	Injury or Poisoning	Arsenic Poisoning	C10;C25	0.3	2012	0.299
disease	0.15499		Nervous System Diseases; Chemically-Induced Disorders	1	Enzyme	SOD2	CURATED	6648	DTO_05007624	2006	0.923	C0311375	P04179	Injury or Poisoning	Arsenic Poisoning	C10;C25	0.3	2006	0.379
disease	0.0036969		Nervous System Diseases; Chemically-Induced Disorders	1		CRP	CURATED	1401		2012	0.962	C0274861	P02741	Injury or Poisoning	Arsenic Poisoning, Inorganic	C10;C25	0.3	2012	0.299
group	0.64329		Infections; Immune System Diseases	1	Transporter	ALB	CURATED	213	DTO_05007405	2019	0.962	C0019693	P02768	Disease or Syndrome	HIV Infections	C01;C20	0.38	2006	0.317
group	0.00054909		Nervous System Diseases; Cardiovascular Diseases	1		APOA1	CURATED	335		2019	0.885	C0038454	P02647	Disease or Syndrome	Cerebrovascular accident	C10;C14	0.38	2002	0.429
group	0.0036969		Cardiovascular Diseases	0.889		CRP	CURATED	1401		2020	0.962	C0018799	P02741	Disease or Syndrome	Heart Diseases	C14	0.38	2002	0.299
disease	0.0184		Mental Disorders	1	Signaling	FGF2	CURATED	2247	DTO_05007599	2019	0.923	C0011581	P09038	Mental or Behavioral Dysfunction	Depressive disorder	F03	0.38	2006	0.383
disease	0.0184		Pathological Conditions, Signs and Symptoms; Eye Diseases	1	Signaling	FGF2	CURATED	2247	DTO_05007599	2018	0.923	C0085109	P09038	Disease or Syndrome	Corneal Neovascularization	C23;C11	0.38	1997	0.383
group	7.5307e-05		Digestive System Diseases	1	Enzyme	GGT1	CURATED	2678	DTO_05007624	2020	0.885	C0023895	P19440	Disease or Syndrome	Liver diseases	C06	0.38	2000	0.496
disease	0.65372		Neoplasms; Immune System Diseases; Hemic and Lymphatic Diseases	0.875	Kinase	JAK2	CURATED	3717	DTO_03300101	2019	0.885	C0079744	O60674	Neoplastic Process	Diffuse Large B-Cell Lymphoma	C04;C20;C15	0.38	2004	0.385
disease	1.2712e-09		Congenital, Hereditary, and Neonatal Diseases and Abnormalities; Nutritional and Metabolic Diseases	1	Enzyme	LPL	CURATED	4023	DTO_05007624	2016	0.808	C0020445	P06858	Disease or Syndrome	Hypercholesterolemia, Familial	C16;C18	0.38	1993	0.474
disease	1.2712e-09		Congenital, Hereditary, and Neonatal Diseases and Abnormalities; Nutritional and Metabolic Diseases	1	Enzyme	LPL	CURATED	4023	DTO_05007624	2016	0.808	C0745103	P06858	Disease or Syndrome	Hyperlipoproteinemia Type IIa	C16;C18	0.38	1993	0.474
disease	1.4614e-22		Digestive System Diseases; Neoplasms	1	Transporter	SLC22A1	CURATED	6580	DTO_05007405	2020	0.731	C2239176	O15245	Neoplastic Process	Liver carcinoma	C06;C04	0.38	2011	0.556
disease	0.15499		Nervous System Diseases; Mental Disorders	0.889	Enzyme	SOD2	CURATED	6648	DTO_05007624	2018	0.923	C0002395	P04179	Disease or Syndrome	Alzheimer's Disease	C10;F03	0.38	2001	0.379
disease	0.15499		Musculoskeletal Diseases	0.9	Enzyme	SOD2	CURATED	6648	DTO_05007624	2020	0.923	C0029408	P04179	Disease or Syndrome	Degenerative polyarthritis	C05	0.38	2004	0.379
disease	7.2668e-09		Digestive System Diseases	1	Nuclear receptor	NR1I2	CURATED	8856	DTO_00102000	2019	0.846	C2711227	O75469	Disease or Syndrome	Steatohepatitis	C06	0.38	2012	0.418
group	0.00093892		Digestive System Diseases	1	Nuclear receptor	NR1H4	CURATED	9971	DTO_00102000	2020	0.808	C0023895	Q96RI1	Disease or Syndrome	Liver diseases	C06	0.38	2008	0.513
disease	1.1086e-21		Neoplasms; Skin and Connective Tissue Diseases	1	Transporter	SLCO1B1	CURATED	10599	DTO_05007405	2019	0.731	C0006142	Q9Y6L6	Neoplastic Process	Malignant neoplasm of breast	C04;C17	0.38	2010	0.538
disease	1.1086e-21		Neoplasms; Skin and Connective Tissue Diseases	1	Transporter	SLCO1B1	CURATED	10599	DTO_05007405	2019	0.731	C0678222	Q9Y6L6	Neoplastic Process	Breast Carcinoma	C04;C17	0.38	2010	0.538
disease	0.15499		Nervous System Diseases; Chemically-Induced Disorders	1	Enzyme	SOD2	CURATED	6648	DTO_05007624	2006	0.923	C0274861	P04179	Injury or Poisoning	Arsenic Poisoning, Inorganic	C10;C25	0.3	2006	0.379
disease	0.0018685		Nervous System Diseases; Cardiovascular Diseases	1		APOE	CURATED	348		2008	0.962	C0750987	P02649	Disease or Syndrome	Arterial Diseases, Common Carotid	C10;C14	0.3	2008	0.338
phenotype	0.0018685		Pathological Conditions, Signs and Symptoms	1		APOE	CURATED	348		2018	0.962	C0015697	P02649	Acquired Abnormality	Arterial Fatty Streak	C23	0.3	2007	0.338
phenotype	7.2668e-09		Pathological Conditions, Signs and Symptoms	1	Nuclear receptor	NR1I2	CURATED	8856	DTO_00102000	2018	0.846	C0015697	O75469	Acquired Abnormality	Arterial Fatty Streak	C23	0.3	2018	0.418
phenotype	0.00093892		Pathological Conditions, Signs and Symptoms	1	Nuclear receptor	NR1H4	CURATED	9971	DTO_00102000	2019	0.808	C0015697	Q96RI1	Acquired Abnormality	Arterial Fatty Streak	C23	0.3	2019	0.513
disease	0.0018685		Cardiovascular Diseases	0.977		APOE	CURATED	348		2020	0.962	C0003850	P02649	Disease or Syndrome	Arteriosclerosis	C14	0.4	1983	0.338
disease	0.64329		Musculoskeletal Diseases	1	Transporter	ALB	CURATED	213	DTO_05007405	2010	0.962	C0003865	P02768	Experimental Model of Disease	Arthritis, Adjuvant-Induced	C05	0.3	2010	0.317
disease	0.0036969		Musculoskeletal Diseases	1		CRP	CURATED	1401		2009	0.962	C0003865	P02741	Experimental Model of Disease	Arthritis, Adjuvant-Induced	C05	0.3	2009	0.299
disease	0.64329		Musculoskeletal Diseases	1	Transporter	ALB	CURATED	213	DTO_05007405	2010	0.962	C0971858	P02768	Experimental Model of Disease	Arthritis, Collagen-Induced	C05	0.3	2010	0.317
disease	0.0036969		Musculoskeletal Diseases	1		CRP	CURATED	1401		2009	0.962	C0971858	P02741	Experimental Model of Disease	Arthritis, Collagen-Induced	C05	0.3	2009	0.299
disease	0.64329		Musculoskeletal Diseases	1	Transporter	ALB	CURATED	213	DTO_05007405	2010	0.962	C0993582	P02768	Experimental Model of Disease	Arthritis, Experimental	C05	0.3	2010	0.317
disease	0.0036969		Musculoskeletal Diseases	1		CRP	CURATED	1401		2009	0.962	C0993582	P02741	Experimental Model of Disease	Arthritis, Experimental	C05	0.3	2009	0.299
disease	0.64329		Nervous System Diseases	1	Transporter	ALB	CURATED	213	DTO_05007405	1971	0.962	C0025290	P02768	Disease or Syndrome	Aseptic Meningitis	C10	0.3	1970	0.317
disease	0.15499		Congenital, Hereditary, and Neonatal Diseases and Abnormalities	1	Enzyme	SOD2	CURATED	6648	DTO_05007624	2008	0.923	C0004045	P04179	Disease or Syndrome	Asphyxia Neonatorum	C16	0.3	2008	0.379
phenotype	0.0184		Pathological Conditions, Signs and Symptoms	1	Signaling	FGF2	CURATED	2247	DTO_05007599	2010	0.923	C3887640	P09038	Pathologic Function	Astrocytosis	C23	0.3	2010	0.383
disease	1.9234e-16		Pathological Conditions, Signs and Symptoms; Nutritional and Metabolic Diseases; Nervous System Diseases	1		APOB	CURATED	338		2008	0.808	C1848533	P04114	Disease or Syndrome	Ataxia with vitamin E deficiency	C23;C18;C10	0.3	2008	0.453
disease	0.00054909		Pathological Conditions, Signs and Symptoms; Nutritional and Metabolic Diseases; Nervous System Diseases	1		APOA1	CURATED	335		2008	0.885	C1848533	P02647	Disease or Syndrome	Ataxia with vitamin E deficiency	C23;C18;C10	0.3	2008	0.429
disease	1.134e-08		Congenital, Hereditary, and Neonatal Diseases and Abnormalities; Nervous System Diseases	1		TDP2	CURATED	51567		2019	0.462	C0087012	O95551	Disease or Syndrome	Ataxia, Spinocerebellar	C16;C10	0.31	2019	0.628
phenotype	1.4525e-13		Cardiovascular Diseases	1	Transporter	ABCA1	CURATED	19	DTO_05007405	2011	0.846	C1563937	O95477	Pathologic Function	Atherogenesis	C14	0.3	2011	0.467
phenotype	0.0018685		Cardiovascular Diseases	1		APOE	CURATED	348		2018	0.962	C1563937	P02649	Pathologic Function	Atherogenesis	C14	0.3	1997	0.338
phenotype	1.1892e-23		Cardiovascular Diseases	1		CETP	CURATED	1071		2016	0.731	C1563937	P11597	Pathologic Function	Atherogenesis	C14	0.3	2016	0.512
phenotype	0.0036969		Cardiovascular Diseases	1		CRP	CURATED	1401		2006	0.962	C1563937	P02741	Pathologic Function	Atherogenesis	C14	0.3	2006	0.299
phenotype	9.841e-24		Cardiovascular Diseases	1		LDLR	CURATED	3949		2017	0.885	C1563937	P01130	Pathologic Function	Atherogenesis	C14	0.3	2002	0.449
phenotype	6.5917e-89		Cardiovascular Diseases	1	Enzyme	LPA	CURATED	4018	DTO_05007624	2007	0.769	C1563937	P08519	Pathologic Function	Atherogenesis	C14	0.3	1992	0.444
phenotype	0.96926		Cardiovascular Diseases	1		NECTIN2	CURATED	5819		2017	0.769	C1563937	Q92692	Pathologic Function	Atherogenesis	C14	0.3	2017	0.575
phenotype	0.15499		Cardiovascular Diseases	1	Enzyme	SOD2	CURATED	6648	DTO_05007624	2010	0.923	C1563937	P04179	Pathologic Function	Atherogenesis	C14	0.3	2002	0.379
phenotype	0.00093892		Cardiovascular Diseases	1	Nuclear receptor	NR1H4	CURATED	9971	DTO_00102000	2019	0.808	C1563937	Q96RI1	Pathologic Function	Atherogenesis	C14	0.3	2019	0.513
phenotype	3.081e-21		Cardiovascular Diseases	1	Transporter	ABCG5	CURATED	64240	DTO_05007405	2001	0.577	C1563937	Q9H222	Pathologic Function	Atherogenesis	C14	0.3	2001	0.592
phenotype	0.0018685		Pathological Conditions, Signs and Symptoms	1		APOE	CURATED	348		2018	0.962	C0264956	P02649	Pathologic Function	Atheroma	C23	0.3	2007	0.338
phenotype	7.2668e-09		Pathological Conditions, Signs and Symptoms	1	Nuclear receptor	NR1I2	CURATED	8856	DTO_00102000	2018	0.846	C0264956	O75469	Pathologic Function	Atheroma	C23	0.3	2018	0.418
phenotype	0.00093892		Pathological Conditions, Signs and Symptoms	1	Nuclear receptor	NR1H4	CURATED	9971	DTO_00102000	2019	0.808	C0264956	Q96RI1	Pathologic Function	Atheroma	C23	0.3	2019	0.513
disease	1.4525e-13		Cardiovascular Diseases	0.992	Transporter	ABCA1	CURATED	19	DTO_05007405	2020	0.846	C0004153	O95477	Disease or Syndrome	Atherosclerosis	C14	0.4	2000	0.467
disease	0.0018685		Cardiovascular Diseases	0.978		APOE	CURATED	348		2020	0.962	C0004153	P02649	Disease or Syndrome	Atherosclerosis	C14	0.4	1983	0.338
disease	1.1892e-23		Cardiovascular Diseases	0.982		CETP	CURATED	1071		2020	0.731	C0004153	P11597	Disease or Syndrome	Atherosclerosis	C14	0.4	1994	0.512
disease	0.0036969		Cardiovascular Diseases	0.942		CRP	CURATED	1401		2020	0.962	C0004153	P02741	Disease or Syndrome	Atherosclerosis	C14	0.4	2000	0.299
disease	6.5917e-89		Cardiovascular Diseases	0.957	Enzyme	LPA	CURATED	4018	DTO_05007624	2020	0.769	C0004153	P08519	Disease or Syndrome	Atherosclerosis	C14	0.4	1987	0.444
disease	3.081e-21		Cardiovascular Diseases	1	Transporter	ABCG5	CURATED	64240	DTO_05007405	2014	0.577	C0004153	Q9H222	Disease or Syndrome	Atherosclerosis	C14	0.35	2000	0.592
disease	0.15499		Cardiovascular Diseases	1	Enzyme	SOD2	CURATED	6648	DTO_05007624	2017	0.923	C0004153	P04179	Disease or Syndrome	Atherosclerosis	C14	0.33	2002	0.379
disease	0.96926		Cardiovascular Diseases	1		NECTIN2	CURATED	5819		2017	0.769	C0004153	Q92692	Disease or Syndrome	Atherosclerosis	C14	0.31	2017	0.575
disease	0.17259		Nervous System Diseases	1		TFAM	CURATED	7019		2018	0.731	C0751415	Q00059	Disease or Syndrome	Atherosclerotic Parkinsonism	C10	0.3	2018	0.529
phenotype	0.0003636		Pathological Conditions, Signs and Symptoms; Nervous System Diseases	1	Enzyme	ALPL	CURATED	249	DTO_05007624	2016	0.769	C0751123	P05186	Disease or Syndrome	Atonic Absence Seizures	C23;C10	0.3	1995	0.546
phenotype	0.0018685		Pathological Conditions, Signs and Symptoms; Nervous System Diseases	1		APOE	CURATED	348		2013	0.962	C0751123	P02649	Disease or Syndrome	Atonic Absence Seizures	C23;C10	0.3	2013	0.338
phenotype	0.0184		Pathological Conditions, Signs and Symptoms; Nervous System Diseases	1	Signaling	FGF2	CURATED	2247	DTO_05007599	2011	0.923	C0751123	P09038	Disease or Syndrome	Atonic Absence Seizures	C23;C10	0.3	2011	0.383
phenotype	0.15499		Pathological Conditions, Signs and Symptoms; Nervous System Diseases	1	Enzyme	SOD2	CURATED	6648	DTO_05007624	2010	0.923	C0751123	P04179	Disease or Syndrome	Atonic Absence Seizures	C23;C10	0.3	2010	0.379
disease	8.6107e-06		Pathological Conditions, Signs and Symptoms; Cardiovascular Diseases	1	Nucleic acid binding	SCMH1	CURATED	22955	DTO_05007557	2018	0.077	C0004238	Q96GD3	Disease or Syndrome	Atrial Fibrillation	C23;C14	0.4	2018	0.931
disease	1.0376e-19		Pathological Conditions, Signs and Symptoms; Cardiovascular Diseases	1	Enzyme modulator	HSPG2	CURATED	3339	DTO_05007584	2018	0.885	C0004238	P98160	Disease or Syndrome	Atrial Fibrillation	C23;C14	0.3	2018	0.438
disease	0.99892		Pathological Conditions, Signs and Symptoms; Cardiovascular Diseases	1	Cellular structure	WDR1	CURATED	9948	DTO_05007530	2018	0.654	C0004238	O75083	Disease or Syndrome	Atrial Fibrillation	C23;C14	0.3	2018	0.623
phenotype	0.64329		Nervous System Diseases	1	Transporter	ALB	CURATED	213	DTO_05007405	2007	0.962	C0236018	P02768	Finding	Aura	C10	0.3	2004	0.317
phenotype	1		Nervous System Diseases	1		ARID1B	CURATED	57492		2018	0.846	C0236018	Q8NFD5	Finding	Aura	C10	0.3	2018	0.503
disease	0.91029		Mental Disorders	1	Enzyme modulator	IGFBP3	CURATED	3486	DTO_05007584	2007	0.808	C0004352	P17936	Mental or Behavioral Dysfunction	Autistic Disorder	F03	0.3	2007	0.439
group	0.45637		Immune System Diseases	0.944	Cell adhesion	FCGR2B	CURATED	2213	DTO_05007620	2019	0.846	C0004364	P31994	Disease or Syndrome	Autoimmune Diseases	C20	0.4	2000	0.522
group	0.15499		Immune System Diseases	1	Enzyme	SOD2	CURATED	6648	DTO_05007624	2011	0.923	C0004364	P04179	Disease or Syndrome	Autoimmune Diseases	C20	0.3	2011	0.379
disease	0.64329		Nervous System Diseases	1	Transporter	ALB	CURATED	213	DTO_05007405	2019	0.962	C0014544	P02768	Disease or Syndrome	Epilepsy	C10	0.34	2004	0.317
phenotype	0.64329		Pathological Conditions, Signs and Symptoms	0.6	Transporter	ALB	CURATED	213	DTO_05007405	2019	0.962	C0030193	P02768	Sign or Symptom	Pain	C23	0.34	1973	0.317
group	0.64329		Nervous System Diseases	1	Transporter	ALB	CURATED	213	DTO_05007405	2019	0.962	C0085584	P02768	Disease or Syndrome	Encephalopathies	C10	0.34	2005	0.317
disease	0.64329		Digestive System Diseases	1	Transporter	ALB	CURATED	213	DTO_05007405	2019	0.962	C0162557	P02768	Disease or Syndrome	Liver Failure, Acute	C06	0.34	2006	0.317
disease	0.031714		Cardiovascular Diseases	0.8		APCS	CURATED	325		2014	0.808	C1956346	P02743	Disease or Syndrome	Coronary Artery Disease	C14	0.34	2003	0.531
disease	0.0018685		Chemically-Induced Disorders; Mental Disorders	0.75		APOE	CURATED	348		2008	0.962	C0001973	P02649	Mental or Behavioral Dysfunction	Alcoholic Intoxication, Chronic	C25;F03	0.34	2002	0.338
disease	0.0018685		Mental Disorders	0.5		APOE	CURATED	348		2016	0.962	C0005586	P02649	Mental or Behavioral Dysfunction	Bipolar Disorder	F03	0.34	1997	0.338
group	0.0018685		Nervous System Diseases; Cardiovascular Diseases	1		APOE	CURATED	348		2009	0.962	C0007273	P02649	Disease or Syndrome	Carotid Artery Diseases	C10;C14	0.34	2002	0.338
disease	0.0184		Pathological Conditions, Signs and Symptoms; Digestive System Diseases	1	Signaling	FGF2	CURATED	2247	DTO_05007599	2013	0.923	C0023890	P09038	Disease or Syndrome	Liver Cirrhosis	C23;C06	0.34	2003	0.383
group	0.0184		Neoplasms; Male Urogenital Diseases	1	Signaling	FGF2	CURATED	2247	DTO_05007599	2012	0.923	C0033578	P09038	Neoplastic Process	Prostatic Neoplasms	C04;C12	0.34	1996	0.383
disease	0.0184		Respiratory Tract Diseases	1	Signaling	FGF2	CURATED	2247	DTO_05007599	2018	0.923	C0034069	P09038	Disease or Syndrome	Pulmonary Fibrosis	C08	0.34	1996	0.383
disease	0.0184		Neoplasms	1	Signaling	FGF2	CURATED	2247	DTO_05007599	2011	0.923	C0555198	P09038	Neoplastic Process	Malignant Glioma	C04	0.34	1997	0.383
disease	1.6432e-05		Neoplasms; Female Urogenital Diseases and Pregnancy Complications	1	Kinase	FGFR3	CURATED	2261	DTO_03300101	2019	0.846	C0007847	P22607	Neoplastic Process	Malignant tumor of cervix	C04;C13	0.34	2013	0.391
disease	0.91029		Skin and Connective Tissue Diseases; Musculoskeletal Diseases; Immune System Diseases	0.75	Enzyme modulator	IGFBP3	CURATED	3486	DTO_05007584	2019	0.808	C0003873	P17936	Disease or Syndrome	Rheumatoid Arthritis	C17;C05;C20	0.34	2007	0.439
disease	0.91029	limited	Congenital, Hereditary, and Neonatal Diseases and Abnormalities; Musculoskeletal Diseases	1	Enzyme modulator	IGFBP3	CURATED	3486	DTO_05007584	2017	0.808	C0175693	P17936	Disease or Syndrome	Russell-Silver syndrome	C16;C05	0.34	1999	0.439
disease	0.99998		Neoplasms; Immune System Diseases; Hemic and Lymphatic Diseases	1	Kinase	JAK1	CURATED	3716	DTO_03300101	2017	0.769	C1961102	P23458	Neoplastic Process	Precursor Cell Lymphoblastic Leukemia Lymphoma	C04;C20;C15	0.34	2008	0.474
disease	0.65372		Cardiovascular Diseases	1	Kinase	JAK2	CURATED	3717	DTO_03300101	2018	0.885	C0151744	O60674	Disease or Syndrome	Myocardial Ischemia	C14	0.34	2005	0.385
disease	1.2712e-09		Neoplasms; Male Urogenital Diseases	1	Enzyme	LPL	CURATED	4023	DTO_05007624	2009	0.808	C0376358	P06858	Neoplastic Process	Malignant neoplasm of prostate	C04;C12	0.34	1994	0.474
group	1.2712e-09		Cardiovascular Diseases	1	Enzyme	LPL	CURATED	4023	DTO_05007624	2008	0.808	C0878544	P06858	Disease or Syndrome	Cardiomyopathies	C14	0.34	1999	0.474
disease	7.7723e-10		Nutritional and Metabolic Diseases; Endocrine System Diseases	1	Transporter	SLC22A3	CURATED	6581	DTO_05007405	2019	0.846	C0011860	O75751	Disease or Syndrome	Diabetes Mellitus, Non-Insulin-Dependent	C18;C19	0.34	2016	0.531
disease	0.15499		Skin and Connective Tissue Diseases; Musculoskeletal Diseases; Immune System Diseases	0.714	Enzyme	SOD2	CURATED	6648	DTO_05007624	2019	0.923	C0003873	P04179	Disease or Syndrome	Rheumatoid Arthritis	C17;C05;C20	0.34	2000	0.379
group	0.15499		Female Urogenital Diseases and Pregnancy Complications; Male Urogenital Diseases	1	Enzyme	SOD2	CURATED	6648	DTO_05007624	2018	0.923	C0022658	P04179	Disease or Syndrome	Kidney Diseases	C13;C12	0.34	2003	0.379
disease	0.15499		Pathological Conditions, Signs and Symptoms; Nutritional and Metabolic Diseases	1	Enzyme	SOD2	CURATED	6648	DTO_05007624	2019	0.923	C0028754	P04179	Disease or Syndrome	Obesity	C23;C18	0.34	2005	0.379
disease	0.15499		Nutritional and Metabolic Diseases; Musculoskeletal Diseases	0.8	Enzyme	SOD2	CURATED	6648	DTO_05007624	2018	0.923	C0029456	P04179	Disease or Syndrome	Osteoporosis	C18;C05	0.34	2008	0.379
disease	0.15499		Digestive System Diseases; Neoplasms	1	Enzyme	SOD2	CURATED	6648	DTO_05007624	2019	0.923	C0279626	P04179	Neoplastic Process	Squamous cell carcinoma of esophagus	C06;C04	0.34	2007	0.379
disease	0.15499		Pathological Conditions, Signs and Symptoms	0.8	Enzyme	SOD2	CURATED	6648	DTO_05007624	2016	0.923	C1623038	P04179	Disease or Syndrome	Cirrhosis	C23	0.34	2002	0.379
disease	0.0012734		Digestive System Diseases; Neoplasms	1	Kinase	TTK	CURATED	7272	DTO_03300101	2018	0.731	C2239176	P33981	Neoplastic Process	Liver carcinoma	C06;C04	0.34	2014	0.555
disease	0.17989		Neoplasms; Male Urogenital Diseases	1	Cellular structure	EZR	CURATED	7430	DTO_05007530	2014	0.808	C0376358	P15311	Neoplastic Process	Malignant neoplasm of prostate	C04;C12	0.34	2004	0.476
group	0.26588		Neoplasms; Skin and Connective Tissue Diseases	1	Signaling	STC2	CURATED	8614	DTO_05007599	2018	0.692	C1458155	O76061	Neoplastic Process	Mammary Neoplasms	C04;C17	0.34	2007	0.573
disease	7.2668e-09		Nutritional and Metabolic Diseases	1	Nuclear receptor	NR1I2	CURATED	8856	DTO_00102000	2017	0.846	C0524620	O75469	Disease or Syndrome	Metabolic Syndrome X	C18	0.34	2010	0.418
disease	0.00093892		Cardiovascular Diseases	1	Nuclear receptor	NR1H4	CURATED	9971	DTO_00102000	2019	0.808	C0004153	Q96RI1	Disease or Syndrome	Atherosclerosis	C14	0.34	2018	0.513
phenotype	0.00010289	moderate		1		SH2B3	CURATED	10019		2013	0.692	C0004368	Q9UQQ2	Pathologic Function	Autoimmune state		0.3	2013	0.527
disease	1.275e-08		Immune System Diseases; Endocrine System Diseases	NA	Transcription factor	ZFAT	CURATED	57623	DTO_05007542	NA	0.423	C0920350	Q9P243	Disease or Syndrome	Autoimmune thyroiditis	C20;C19	0.3	NA	0.769
disease	3.0504e-07		Nervous System Diseases	1	Enzyme	ALDH5A1	CURATED	7915	DTO_05007624	2007	0.462	C0752200	P51649	Disease or Syndrome	Autosomal Dominant Familial Dystonia	C10	0.3	2007	0.619
disease	1.1608e-12		Congenital, Hereditary, and Neonatal Diseases and Abnormalities; Musculoskeletal Diseases; Nervous System Diseases	NA		TMEM43	CURATED	79188		NA	0.462	C1450051	Q9BTV4	Disease or Syndrome	Autosomal Recessive Emery-Dreifuss Muscular Dystrophy	C16;C05;C10	0.3	NA	0.653
disease	3.0504e-07		Nervous System Diseases	1	Enzyme	ALDH5A1	CURATED	7915	DTO_05007624	2007	0.462	C0752201	P51649	Disease or Syndrome	Autosomal Recessive Familial Dystonia	C10	0.3	2007	0.619
disease	4.9944e-08		Congenital, Hereditary, and Neonatal Diseases and Abnormalities; Nutritional and Metabolic Diseases; Female Urogenital Diseases and Pregnancy Complications; Musculoskeletal Diseases; Male Urogenital Diseases	1	Enzyme	ENPP1	CURATED	5167	DTO_05007624	2020	0.808	C0342643	P22413	Disease or Syndrome	Autosomal recessive hypophosphatemic vitamin D refractory rickets	C16;C18;C13;C05;C12	0.37	2010	0.498
disease	0.64329		Nervous System Diseases	1	Transporter	ALB	CURATED	213	DTO_05007405	2007	0.962	C0751111	P02768	Disease or Syndrome	Awakening Epilepsy	C10	0.3	2004	0.317
disease	1		Nervous System Diseases	1		ARID1B	CURATED	57492		2018	0.846	C0751111	Q8NFD5	Disease or Syndrome	Awakening Epilepsy	C10	0.3	2018	0.503
disease	0.64329		Male Urogenital Diseases	1	Transporter	ALB	CURATED	213	DTO_05007405	2016	0.962	C0004509	P02768	Disease or Syndrome	Azoospermia	C12	0.3	2016	0.317
disease	0.030057		Pathological Conditions, Signs and Symptoms; Female Urogenital Diseases and Pregnancy Complications; Male Urogenital Diseases	1	Signaling	GH1	CURATED	2688	DTO_05007599	2003	0.923	C0242528	P01241	Disease or Syndrome	Azotemia	C23;C13;C12	0.3	2003	0.373
disease	7.2668e-09		Digestive System Diseases; Neoplasms	1	Nuclear receptor	NR1I2	CURATED	8856	DTO_00102000	2011	0.846	C1258085	O75469	Disease or Syndrome	Barrett Epithelium	C06;C04	0.3	2011	0.418
disease	7.2668e-09		Digestive System Diseases; Neoplasms	1	Nuclear receptor	NR1I2	CURATED	8856	DTO_00102000	2018	0.846	C0004763	O75469	Disease or Syndrome	Barrett Esophagus	C06;C04	0.31	2011	0.418
disease	1.9234e-16		Congenital, Hereditary, and Neonatal Diseases and Abnormalities; Eye Diseases; Skin and Connective Tissue Diseases; Stomatognathic Diseases; Cardiovascular Diseases	1		APOB	CURATED	338		2002	0.808	C0004943	P04114	Disease or Syndrome	Behcet Syndrome	C16;C11;C17;C07;C14	0.3	2002	0.453
disease	0.00054909		Congenital, Hereditary, and Neonatal Diseases and Abnormalities; Eye Diseases; Skin and Connective Tissue Diseases; Stomatognathic Diseases; Cardiovascular Diseases	1		APOA1	CURATED	335		2002	0.885	C0004943	P02647	Disease or Syndrome	Behcet Syndrome	C16;C11;C17;C07;C14	0.3	2002	0.429
disease	0.0039011		Neoplasms; Nervous System Diseases	1		CST3	CURATED	1471		2010	0.808	C0281784	P01034	Neoplastic Process	Benign Meningioma	C04;C10	0.31	2005	0.436
group	0.030182		Neoplasms	1	Nuclear receptor	PPARA	CURATED	5465	DTO_00102000	2007	0.885	C0086692	Q07869	Neoplastic Process	Benign Neoplasm	C04	0.3	2007	0.432
group	0.15499		Neoplasms	1	Enzyme	SOD2	CURATED	6648	DTO_05007624	2009	0.923	C0086692	P04179	Neoplastic Process	Benign Neoplasm	C04	0.3	2001	0.379
disease	1.6432e-05		Neoplasms; Female Urogenital Diseases and Pregnancy Complications; Male Urogenital Diseases	NA	Kinase	FGFR3	CURATED	2261	DTO_03300101	NA	0.846	C0154017	P22607	Neoplastic Process	Benign neoplasm of bladder	C04;C13;C12	0.3	NA	0.391
disease	0.15499		Neoplasms; Nervous System Diseases	1	Enzyme	SOD2	CURATED	6648	DTO_05007624	2011	0.923	C0496899	P04179	Neoplastic Process	Benign neoplasm of brain, unspecified	C04;C10	0.3	2011	0.379
disease	1		Congenital, Hereditary, and Neonatal Diseases and Abnormalities; Neoplasms; Female Urogenital Diseases and Pregnancy Complications; Male Urogenital Diseases	1	Kinase	MAP3K4	CURATED	4216	DTO_03300101	2017	0.462	C2930471	Q9Y6R4	Disease or Syndrome	Bilateral Wilms Tumor	C16;C04;C13;C12	0.3	2017	0.729
disease	0.64329		Pathological Conditions, Signs and Symptoms; Digestive System Diseases	1	Transporter	ALB	CURATED	213	DTO_05007405	2018	0.962	C0023892	P02768	Disease or Syndrome	Biliary cirrhosis	C23;C06	0.3	2018	0.317
disease	0.64329		Pathological Conditions, Signs and Symptoms; Digestive System Diseases	1	Transporter	ALB	CURATED	213	DTO_05007405	2018	0.962	C4551595	P02768	Disease or Syndrome	Biliary Cirrhosis, Primary, 1	C23;C06	0.3	2018	0.317
disease	2.702e-17		Mental Disorders	1	Kinase	PFKL	CURATED	5211	DTO_03300101	2001	0.269	C0005586	P17858	Mental or Behavioral Dysfunction	Bipolar Disorder	F03	0.32	1995	0.722
disease	0.15499		Mental Disorders	1	Enzyme	SOD2	CURATED	6648	DTO_05007624	2011	0.923	C0005586	P04179	Mental or Behavioral Dysfunction	Bipolar Disorder	F03	0.32	2010	0.379
disease	7.7599e-06		Mental Disorders	1	Receptor	CLEC10A	CURATED	10462	DTO_05007575	2012	0.692	C0005586	Q8IUN9	Mental or Behavioral Dysfunction	Bipolar Disorder	F03	0.31	2012	0.606
disease	0.15499		Neoplasms; Female Urogenital Diseases and Pregnancy Complications; Male Urogenital Diseases	1	Enzyme	SOD2	CURATED	6648	DTO_05007624	2017	0.923	C0005695	P04179	Neoplastic Process	Bladder Neoplasm	C04;C13;C12	0.39	2004	0.379
disease	0.91029		Neoplasms; Female Urogenital Diseases and Pregnancy Complications; Male Urogenital Diseases	1	Enzyme modulator	IGFBP3	CURATED	3486	DTO_05007584	2011	0.808	C0005695	P17936	Neoplastic Process	Bladder Neoplasm	C04;C13;C12	0.33	2006	0.439
disease	3.4212e-10		Neoplasms; Female Urogenital Diseases and Pregnancy Complications; Male Urogenital Diseases	1		POR	CURATED	5447		1996	0.769	C0005695	P16435	Neoplastic Process	Bladder Neoplasm	C04;C13;C12	0.3	1996	0.502
disease	0.96926		Neoplasms; Female Urogenital Diseases and Pregnancy Complications; Male Urogenital Diseases	1		NECTIN2	CURATED	5819		2018	0.769	C0005695	Q92692	Neoplastic Process	Bladder Neoplasm	C04;C13;C12	0.3	2018	0.575
group	3.081e-21	strong	Hemic and Lymphatic Diseases	1	Transporter	ABCG5	CURATED	64240	DTO_05007405	2016	0.577	C0005818	Q9H222	Disease or Syndrome	Blood Platelet Disorders	C15	0.3	2016	0.592
phenotype	0.00091697		Pathological Conditions, Signs and Symptoms	1	G-protein coupled receptor	MC4R	CURATED	4160	DTO_02300001	2012	0.692	C0005910	P32245	Organism Attribute	Body Weight	C23	0.3	2012	0.535
disease	0.030057		Congenital, Hereditary, and Neonatal Diseases and Abnormalities; Female Urogenital Diseases and Pregnancy Complications; Male Urogenital Diseases; Endocrine System Diseases; Cardiovascular Diseases	1	Signaling	GH1	CURATED	2688	DTO_05007599	2004	0.923	C1527168	P01241	Disease or Syndrome	Bonnevie-Ullrich Syndrome	C16;C13;C12;C19;C14	0.3	2004	0.373
disease	0.15499		Congenital, Hereditary, and Neonatal Diseases and Abnormalities; Female Urogenital Diseases and Pregnancy Complications; Male Urogenital Diseases; Endocrine System Diseases; Cardiovascular Diseases	1	Enzyme	SOD2	CURATED	6648	DTO_05007624	2014	0.923	C1527168	P04179	Disease or Syndrome	Bonnevie-Ullrich Syndrome	C16;C13;C12;C19;C14	0.3	2014	0.379
disease	0.17259		Neoplasms	1		TFAM	CURATED	7019		2011	0.731	C0006079	Q00059	Neoplastic Process	Bowen's Disease	C04	0.3	2011	0.529
group	0.64329		Nervous System Diseases	1	Transporter	ALB	CURATED	213	DTO_05007405	2005	0.962	C0006111	P02768	Disease or Syndrome	Brain Diseases	C10	0.3	2005	0.317
group	3.0504e-07		Nutritional and Metabolic Diseases; Nervous System Diseases	1	Enzyme	ALDH5A1	CURATED	7915	DTO_05007624	2007	0.462	C0006112	P51649	Disease or Syndrome	Brain Diseases, Metabolic	C18;C10	0.3	2007	0.619
group	3.0504e-07		Nutritional and Metabolic Diseases; Nervous System Diseases	1	Enzyme	ALDH5A1	CURATED	7915	DTO_05007624	2007	0.462	C0751744	P51649	Disease or Syndrome	Brain Diseases, Metabolic, Acquired	C18;C10	0.3	2007	0.619
phenotype	0.0039011	limited	Pathological Conditions, Signs and Symptoms; Nervous System Diseases; Cardiovascular Diseases	NA		CST3	CURATED	1471		NA	0.808	C0553692	P01034	Pathologic Function	Brain hemorrhage	C23;C10;C14	0.3	NA	0.436
disease	0.0184		Pathological Conditions, Signs and Symptoms; Nervous System Diseases; Cardiovascular Diseases	1	Signaling	FGF2	CURATED	2247	DTO_05007599	2017	0.923	C0751955	P09038	Disease or Syndrome	Brain Infarction	C23;C10;C14	0.31	2007	0.383
phenotype	0.0184		Pathological Conditions, Signs and Symptoms; Nervous System Diseases; Cardiovascular Diseases	1	Signaling	FGF2	CURATED	2247	DTO_05007599	2007	0.923	C0751953	P09038	Disease or Syndrome	Brain Infarction, Posterior Circulation	C23;C10;C14	0.3	2007	0.383
disease	0.64329		Nervous System Diseases; Cardiovascular Diseases	1	Transporter	ALB	CURATED	213	DTO_05007405	2006	0.962	C0007786	P02768	Disease or Syndrome	Brain Ischemia	C10;C14	0.3	2006	0.317
disease	0.15499		Nervous System Diseases; Cardiovascular Diseases	1	Enzyme	SOD2	CURATED	6648	DTO_05007624	2009	0.923	C0007786	P04179	Disease or Syndrome	Brain Ischemia	C10;C14	0.3	2004	0.379
group	0.15499		Neoplasms; Nervous System Diseases	1	Enzyme	SOD2	CURATED	6648	DTO_05007624	2011	0.923	C0006118	P04179	Neoplastic Process	Brain Neoplasms	C04;C10	0.31	2008	0.379
disease	0.15499		Nervous System Diseases; Cardiovascular Diseases	1	Enzyme	SOD2	CURATED	6648	DTO_05007624	2001	0.923	C0751022	P04179	Disease or Syndrome	Brain Stem Ischemia, Transient	C10;C14	0.3	2001	0.379
disease	0.15499		Neoplasms; Nervous System Diseases	1	Enzyme	SOD2	CURATED	6648	DTO_05007624	2011	0.923	C0750974	P04179	Neoplastic Process	Brain Tumor, Primary	C04;C10	0.3	2011	0.379
disease	1		Neoplasms; Skin and Connective Tissue Diseases	NA		ARID1B	CURATED	57492		NA	0.846	C0858252	Q8NFD5	Neoplastic Process	Breast adenocarcinoma	C04;C17	0.3	NA	0.503
disease	0.15499		Neoplasms; Skin and Connective Tissue Diseases	0.898	Enzyme	SOD2	CURATED	6648	DTO_05007624	2019	0.923	C0678222	P04179	Neoplastic Process	Breast Carcinoma	C04;C17	0.4	1995	0.379
disease	0.26588		Neoplasms; Skin and Connective Tissue Diseases	1	Signaling	STC2	CURATED	8614	DTO_05007599	2019	0.692	C0678222	O76061	Neoplastic Process	Breast Carcinoma	C04;C17	0.35	2002	0.573
disease	1.1586e-09		Neoplasms; Skin and Connective Tissue Diseases	1		PDZK1	CURATED	5174		2015	0.654	C0678222	Q5T2W1	Neoplastic Process	Breast Carcinoma	C04;C17	0.31	2000	0.65
disease	8.5042e-14		Neoplasms; Skin and Connective Tissue Diseases	1	Enzyme	SYNJ2	CURATED	8871	DTO_05007624	2015	0.577	C0678222	O15056	Neoplastic Process	Breast Carcinoma	C04;C17	0.31	2005	0.691
disease	0.96926		Neoplasms; Skin and Connective Tissue Diseases	1		NECTIN2	CURATED	5819		2013	0.769	C0678222	Q92692	Neoplastic Process	Breast Carcinoma	C04;C17	0.3	2013	0.575
disease	1		Neoplasms; Skin and Connective Tissue Diseases	NA		ARID1B	CURATED	57492		NA	0.846	C0678222	Q8NFD5	Neoplastic Process	Breast Carcinoma	C04;C17	0.3	NA	0.503
disease	3.9682e-22		Neoplasms; Skin and Connective Tissue Diseases	1		CTU2	CURATED	348180		2016	0.423	C0678222	Q2VPK5	Neoplastic Process	Breast Carcinoma	C04;C17	0.3	2016	0.695
disease	0.64329		Female Urogenital Diseases and Pregnancy Complications; Male Urogenital Diseases	1	Transporter	ALB	CURATED	213	DTO_05007405	2009	0.962	C1704377	P02768	Disease or Syndrome	Bright Disease	C13;C12	0.3	1980	0.317
disease	0.0036969		Nutritional and Metabolic Diseases; Immune System Diseases; Endocrine System Diseases	1		CRP	CURATED	1401		2010	0.962	C0342302	P02741	Disease or Syndrome	Brittle diabetes	C18;C20;C19	0.3	2010	0.299
disease	0.00010289		Nutritional and Metabolic Diseases; Immune System Diseases; Endocrine System Diseases	1		SH2B3	CURATED	10019		2018	0.692	C0342302	Q9UQQ2	Disease or Syndrome	Brittle diabetes	C18;C20;C19	0.3	2018	0.527
phenotype	0.0003636		Nutritional and Metabolic Diseases	1	Enzyme	ALPL	CURATED	249	DTO_05007624	2011	0.769	C0006663	P05186	Pathologic Function	Calcinosis	C18	0.3	2011	0.546
phenotype	0.65372		Nutritional and Metabolic Diseases	1	Kinase	JAK2	CURATED	3717	DTO_03300101	2011	0.885	C0006663	O60674	Pathologic Function	Calcinosis	C18	0.3	2011	0.385
disease	0.066228		Chemically-Induced Disorders; Mental Disorders	1	Receptor	SCARB1	CURATED	949	DTO_05007575	2006	0.731	C0006868	Q8WTV0	Mental or Behavioral Dysfunction	Cannabis Abuse	C25;F03	0.3	2006	0.559
disease	0.066228		Chemically-Induced Disorders; Mental Disorders	1	Receptor	SCARB1	CURATED	949	DTO_05007575	2006	0.731	C0006870	Q8WTV0	Mental or Behavioral Dysfunction	Cannabis Dependence	C25;F03	0.3	2006	0.559
group	0.066228		Chemically-Induced Disorders; Mental Disorders	1	Receptor	SCARB1	CURATED	949	DTO_05007575	2006	0.731	C0236735	Q8WTV0	Mental or Behavioral Dysfunction	Cannabis-Related Disorder	C25;F03	0.3	2006	0.559
group	0.030182		Neoplasms	1	Nuclear receptor	PPARA	CURATED	5465	DTO_00102000	2018	0.885	C0007097	Q07869	Neoplastic Process	Carcinoma	C04	0.33	2000	0.432
group	0.17989		Neoplasms	1	Cellular structure	EZR	CURATED	7430	DTO_05007530	2019	0.808	C0007097	P15311	Neoplastic Process	Carcinoma	C04	0.35	1999	0.476
group	1.2712e-09		Neoplasms	1	Enzyme	LPL	CURATED	4023	DTO_05007624	2002	0.808	C0007097	P06858	Neoplastic Process	Carcinoma	C04	0.32	1994	0.474
group	7.5307e-05		Neoplasms	1	Enzyme	GGT1	CURATED	2678	DTO_05007624	2002	0.885	C0007097	P19440	Neoplastic Process	Carcinoma	C04	0.31	1998	0.496
group	0.066228		Neoplasms	1	Receptor	SCARB1	CURATED	949	DTO_05007575	2002	0.731	C0007097	Q8WTV0	Neoplastic Process	Carcinoma	C04	0.3	2002	0.559
group	0.73709		Neoplasms	1	Nucleic acid binding	EIF5A	CURATED	1984	DTO_05007557	2005	0.692	C0007097	P63241	Neoplastic Process	Carcinoma	C04	0.3	2005	0.612
group	0.15499		Neoplasms	1	Enzyme	SOD2	CURATED	6648	DTO_05007624	2000	0.923	C0007097	P04179	Neoplastic Process	Carcinoma	C04	0.3	2000	0.379
disease	1.6432e-05		Neoplasms; Female Urogenital Diseases and Pregnancy Complications; Male Urogenital Diseases	NA	Kinase	FGFR3	CURATED	2261	DTO_03300101	NA	0.846	C0154091	P22607	Neoplastic Process	Carcinoma in situ of bladder	C04;C13;C12	0.3	NA	0.391
disease	1.6432e-05		Neoplasms	NA	Kinase	FGFR3	CURATED	2261	DTO_03300101	NA	0.846	C0851140	P22607	Neoplastic Process	Carcinoma in situ of uterine cervix	C04	0.3	NA	0.391
disease	0.00054909		Neoplasms	1		APOA1	CURATED	335		2004	0.885	C0205643	P02647	Neoplastic Process	Carcinoma, Cribriform	C04	0.3	2004	0.429
disease	0.0018685		Neoplasms	1		APOE	CURATED	348		2011	0.962	C0205643	P02649	Neoplastic Process	Carcinoma, Cribriform	C04	0.3	2011	0.338
disease	0.15499		Neoplasms	1	Enzyme	SOD2	CURATED	6648	DTO_05007624	2003	0.923	C0205643	P04179	Neoplastic Process	Carcinoma, Cribriform	C04	0.3	2003	0.379
disease	7.2668e-09		Neoplasms	1	Nuclear receptor	NR1I2	CURATED	8856	DTO_00102000	2011	0.846	C0205643	O75469	Neoplastic Process	Carcinoma, Cribriform	C04	0.3	2011	0.418
disease	0.00054909		Neoplasms	1		APOA1	CURATED	335		2004	0.885	C0205644	P02647	Neoplastic Process	Carcinoma, Granular Cell	C04	0.3	2004	0.429
disease	0.0018685		Neoplasms	1		APOE	CURATED	348		2011	0.962	C0205644	P02649	Neoplastic Process	Carcinoma, Granular Cell	C04	0.3	2011	0.338
disease	0.15499		Neoplasms	1	Enzyme	SOD2	CURATED	6648	DTO_05007624	2003	0.923	C0205644	P04179	Neoplastic Process	Carcinoma, Granular Cell	C04	0.3	2003	0.379
disease	7.2668e-09		Neoplasms	1	Nuclear receptor	NR1I2	CURATED	8856	DTO_00102000	2011	0.846	C0205644	O75469	Neoplastic Process	Carcinoma, Granular Cell	C04	0.3	2011	0.418
disease	3.2577e-06		Neoplasms	1		UGT1A1	CURATED	54658		2010	0.769	C0262584	P22309	Neoplastic Process	Carcinoma, Small Cell	C04	0.3	2010	0.464
disease	0.030182		Neoplasms	1	Nuclear receptor	PPARA	CURATED	5465	DTO_00102000	2000	0.885	C0205697	Q07869	Neoplastic Process	Carcinoma, Spindle-Cell	C04	0.3	2000	0.432
disease	0.066228		Neoplasms	1	Receptor	SCARB1	CURATED	949	DTO_05007575	2002	0.731	C0205697	Q8WTV0	Neoplastic Process	Carcinoma, Spindle-Cell	C04	0.3	2002	0.559
disease	0.73709		Neoplasms	1	Nucleic acid binding	EIF5A	CURATED	1984	DTO_05007557	2005	0.692	C0205697	P63241	Neoplastic Process	Carcinoma, Spindle-Cell	C04	0.3	2005	0.612
disease	7.5307e-05		Neoplasms	1	Enzyme	GGT1	CURATED	2678	DTO_05007624	2002	0.885	C0205697	P19440	Neoplastic Process	Carcinoma, Spindle-Cell	C04	0.3	2002	0.496
disease	1.2712e-09		Neoplasms	1	Enzyme	LPL	CURATED	4023	DTO_05007624	2002	0.808	C0205697	P06858	Neoplastic Process	Carcinoma, Spindle-Cell	C04	0.3	2002	0.474
disease	0.15499		Neoplasms	1	Enzyme	SOD2	CURATED	6648	DTO_05007624	2000	0.923	C0205697	P04179	Neoplastic Process	Carcinoma, Spindle-Cell	C04	0.3	2000	0.379
disease	0.17989		Neoplasms	1	Cellular structure	EZR	CURATED	7430	DTO_05007530	2002	0.808	C0205697	P15311	Neoplastic Process	Carcinoma, Spindle-Cell	C04	0.3	2002	0.476
disease	1.6432e-05		Neoplasms	1	Kinase	FGFR3	CURATED	2261	DTO_03300101	2019	0.846	C0007138	P22607	Neoplastic Process	Carcinoma, Transitional Cell	C04	0.4	2001	0.391
disease	0.91029		Neoplasms	1	Enzyme modulator	IGFBP3	CURATED	3486	DTO_05007584	2011	0.808	C0007138	P17936	Neoplastic Process	Carcinoma, Transitional Cell	C04	0.31	2007	0.439
phenotype	0.030182		Neoplasms	1	Nuclear receptor	PPARA	CURATED	5465	DTO_00102000	2000	0.885	C0205699	Q07869	Neoplastic Process	Carcinomatosis	C04	0.3	2000	0.432
phenotype	0.066228		Neoplasms	1	Receptor	SCARB1	CURATED	949	DTO_05007575	2002	0.731	C0205699	Q8WTV0	Neoplastic Process	Carcinomatosis	C04	0.3	2002	0.559
phenotype	0.73709		Neoplasms	1	Nucleic acid binding	EIF5A	CURATED	1984	DTO_05007557	2005	0.692	C0205699	P63241	Neoplastic Process	Carcinomatosis	C04	0.3	2005	0.612
phenotype	7.5307e-05		Neoplasms	1	Enzyme	GGT1	CURATED	2678	DTO_05007624	2002	0.885	C0205699	P19440	Neoplastic Process	Carcinomatosis	C04	0.3	2002	0.496
phenotype	1.2712e-09		Neoplasms	1	Enzyme	LPL	CURATED	4023	DTO_05007624	2002	0.808	C0205699	P06858	Neoplastic Process	Carcinomatosis	C04	0.3	2002	0.474
phenotype	0.15499		Neoplasms	1	Enzyme	SOD2	CURATED	6648	DTO_05007624	2000	0.923	C0205699	P04179	Neoplastic Process	Carcinomatosis	C04	0.3	2000	0.379
phenotype	0.17989		Neoplasms	1	Cellular structure	EZR	CURATED	7430	DTO_05007530	2002	0.808	C0205699	P15311	Neoplastic Process	Carcinomatosis	C04	0.3	2002	0.476
phenotype	0.00054909		Pathological Conditions, Signs and Symptoms	1		APOA1	CURATED	335		2011	0.885	C0376297	P02647	Pathologic Function	Cardiac Death	C23	0.3	2011	0.429
phenotype	0.030182		Pathological Conditions, Signs and Symptoms; Cardiovascular Diseases	1	Nuclear receptor	PPARA	CURATED	5465	DTO_00102000	2012	0.885	C1383860	Q07869	Pathologic Function	Cardiac Hypertrophy	C23;C14	0.3	2012	0.432
phenotype	0.0184		Pathological Conditions, Signs and Symptoms; Cardiovascular Diseases	1	Signaling	FGF2	CURATED	2247	DTO_05007599	1999	0.923	C1383860	P09038	Pathologic Function	Cardiac Hypertrophy	C23;C14	0.3	1999	0.383
phenotype	0.15499		Pathological Conditions, Signs and Symptoms; Cardiovascular Diseases	1	Enzyme	SOD2	CURATED	6648	DTO_05007624	2009	0.923	C1383860	P04179	Pathologic Function	Cardiac Hypertrophy	C23;C14	0.3	2009	0.379
phenotype	0.030182		Pathological Conditions, Signs and Symptoms; Cardiovascular Diseases	1	Nuclear receptor	PPARA	CURATED	5465	DTO_00102000	2012	0.885	C0018800	Q07869	Finding	Cardiomegaly	C23;C14	0.31	2003	0.432
phenotype	0.15499		Pathological Conditions, Signs and Symptoms; Cardiovascular Diseases	1	Enzyme	SOD2	CURATED	6648	DTO_05007624	2009	0.923	C0018800	P04179	Finding	Cardiomegaly	C23;C14	0.3	2009	0.379
group	0.15499		Cardiovascular Diseases	1	Enzyme	SOD2	CURATED	6648	DTO_05007624	2020	0.923	C0878544	P04179	Disease or Syndrome	Cardiomyopathies	C14	0.35	2004	0.379
group	0.15499		Cardiovascular Diseases	1	Enzyme	SOD2	CURATED	6648	DTO_05007624	2013	0.923	C0033141	P04179	Disease or Syndrome	Cardiomyopathies, Primary	C14	0.31	1999	0.379
group	1.2712e-09		Cardiovascular Diseases	1	Enzyme	LPL	CURATED	4023	DTO_05007624	1999	0.808	C0033141	P06858	Disease or Syndrome	Cardiomyopathies, Primary	C14	0.3	1999	0.474
group	1.2538e-06		Cardiovascular Diseases	1		SHBG	CURATED	6462		2015	0.808	C0007193	P04278	Disease or Syndrome	Cardiomyopathy, Dilated	C14	0.3	2015	0.438
disease	0.15499		Cardiovascular Diseases	1	Enzyme	SOD2	CURATED	6648	DTO_05007624	2011	0.923	C1449563	P04179	Disease or Syndrome	Cardiomyopathy, Familial Idiopathic	C14	0.31	1999	0.379
disease	1.2538e-06		Cardiovascular Diseases	1		SHBG	CURATED	6462		2015	0.808	C1449563	P04278	Disease or Syndrome	Cardiomyopathy, Familial Idiopathic	C14	0.3	2015	0.438
group	0.64329		Cardiovascular Diseases	0.965	Transporter	ALB	CURATED	213	DTO_05007405	2020	0.962	C0007222	P02768	Disease or Syndrome	Cardiovascular Diseases	C14	0.4	1993	0.317
group	0.010024		Cardiovascular Diseases	1		APOC3	CURATED	345		2020	0.731	C0007222	P02656	Disease or Syndrome	Cardiovascular Diseases	C14	0.4	2000	0.531
group	1.1892e-23		Cardiovascular Diseases	0.914		CETP	CURATED	1071		2020	0.731	C0007222	P11597	Disease or Syndrome	Cardiovascular Diseases	C14	0.4	2002	0.512
group	0.0036969		Cardiovascular Diseases	0.955		CRP	CURATED	1401		2020	0.962	C0007222	P02741	Disease or Syndrome	Cardiovascular Diseases	C14	0.4	2000	0.299
group	0.0039011		Cardiovascular Diseases	0.96		CST3	CURATED	1471		2019	0.808	C0007222	P01034	Disease or Syndrome	Cardiovascular Diseases	C14	0.4	2004	0.436
group	0.030057		Cardiovascular Diseases	0.923	Signaling	GH1	CURATED	2688	DTO_05007599	2019	0.923	C0007222	P01241	Disease or Syndrome	Cardiovascular Diseases	C14	0.4	2003	0.373
group	1.2712e-09		Cardiovascular Diseases	1	Enzyme	LPL	CURATED	4023	DTO_05007624	2019	0.808	C0007222	P06858	Disease or Syndrome	Cardiovascular Diseases	C14	0.4	1993	0.474
disease	0.0036969		Cardiovascular Diseases	1		CRP	CURATED	1401		2010	0.962	C0869523	P02741	Disease or Syndrome	Carditis	C14	0.3	2010	0.299
disease	7.7723e-10		Cardiovascular Diseases	1	Transporter	SLC22A3	CURATED	6581	DTO_05007405	2011	0.846	C0869523	O75751	Disease or Syndrome	Carditis	C14	0.3	2011	0.531
disease	0.0018685		Nervous System Diseases; Cardiovascular Diseases	1		APOE	CURATED	348		2019	0.962	C0751633	P02649	Acquired Abnormality	Carotid Artery Plaque	C10;C14	0.32	2006	0.338
disease	0.0018685		Nervous System Diseases; Cardiovascular Diseases	0.867		APOE	CURATED	348		2018	0.962	C0577631	P02649	Disease or Syndrome	Carotid Atherosclerosis	C10;C14	0.4	1997	0.338
disease	0.15499		Nervous System Diseases; Cardiovascular Diseases	1	Enzyme	SOD2	CURATED	6648	DTO_05007624	2001	0.923	C0751019	P04179	Disease or Syndrome	Carotid Circulation Transient Ischemic Attack	C10;C14	0.3	2001	0.379
disease	0.0018685		Nervous System Diseases; Cardiovascular Diseases	1		APOE	CURATED	348		2012	0.962	C0007282	P02649	Disease or Syndrome	Carotid Stenosis	C10;C14	0.33	2001	0.338
phenotype	0.0018685		Nervous System Diseases; Cardiovascular Diseases	1		APOE	CURATED	348		2006	0.962	C0751634	P02649	Acquired Abnormality	Carotid Ulcer	C10;C14	0.3	2006	0.338
disease	0.15499		Eye Diseases; Cardiovascular Diseases	1	Enzyme	SOD2	CURATED	6648	DTO_05007624	2013	0.923	C1859317	P04179	Disease or Syndrome	Cataract and cardiomyopathy	C11;C14	0.3	2013	0.379
disease	1.9234e-16		Digestive System Diseases; Nutritional and Metabolic Diseases	1		APOB	CURATED	338		2018	0.808	C0007570	P04114	Disease or Syndrome	Celiac Disease	C06;C18	0.31	2009	0.453
disease	0.010024		Digestive System Diseases; Nutritional and Metabolic Diseases	1		APOC3	CURATED	345		2018	0.731	C0007570	P02656	Disease or Syndrome	Celiac Disease	C06;C18	0.3	2018	0.531
disease	1.2712e-09		Digestive System Diseases; Nutritional and Metabolic Diseases	1	Enzyme	LPL	CURATED	4023	DTO_05007624	2018	0.808	C0007570	P06858	Disease or Syndrome	Celiac Disease	C06;C18	0.3	2018	0.474
disease	5.9807e-07		Digestive System Diseases; Nutritional and Metabolic Diseases	1		UGT1A4	CURATED	54657		2018	0.654	C0007570	P22310	Disease or Syndrome	Celiac Disease	C06;C18	0.3	2018	0.595
disease	3.0504e-07		Nutritional and Metabolic Diseases; Nervous System Diseases	1	Enzyme	ALDH5A1	CURATED	7915	DTO_05007624	2007	0.462	C0750968	P51649	Disease or Syndrome	Central Nervous System Metabolic Disorders	C18;C10	0.3	2007	0.619
disease	0.0039011		Congenital, Hereditary, and Neonatal Diseases and Abnormalities; Nutritional and Metabolic Diseases; Nervous System Diseases; Cardiovascular Diseases	1		CST3	CURATED	1471		2008	0.808	C1956349	P01034	Disease or Syndrome	Cerebral Amyloid Angiopathy, Genetic	C16;C18;C10;C14	0.3	2008	0.436
disease	0.0039011		Congenital, Hereditary, and Neonatal Diseases and Abnormalities; Nutritional and Metabolic Diseases; Nervous System Diseases; Cardiovascular Diseases	1		CST3	CURATED	1471		2008	0.808	C1510489	P01034	Disease or Syndrome	Cerebral Amyloid Angiopathy, Hereditary	C16;C18;C10;C14	0.39	1983	0.436
disease	0.0039011		Neoplasms; Nervous System Diseases	1		CST3	CURATED	1471		2010	0.808	C0751303	P01034	Neoplastic Process	Cerebral Convexity Meningioma	C04;C10	0.3	2010	0.436
disease	9.934e-07		Pathological Conditions, Signs and Symptoms; Nervous System Diseases; Cardiovascular Diseases	1	Enzyme	ADH1B	CURATED	125	DTO_05007624	2004	0.846	C0007785	P00325	Disease or Syndrome	Cerebral Infarction	C23;C10;C14	0.31	2004	0.502
phenotype	9.934e-07		Pathological Conditions, Signs and Symptoms; Nervous System Diseases; Cardiovascular Diseases	1	Enzyme	ADH1B	CURATED	125	DTO_05007624	2004	0.846	C0751010	P00325	Disease or Syndrome	Cerebral Infarction, Left Hemisphere	C23;C10;C14	0.3	2004	0.502
phenotype	9.934e-07		Pathological Conditions, Signs and Symptoms; Nervous System Diseases; Cardiovascular Diseases	1	Enzyme	ADH1B	CURATED	125	DTO_05007624	2004	0.846	C0751011	P00325	Disease or Syndrome	Cerebral Infarction, Right Hemisphere	C23;C10;C14	0.3	2004	0.502
disease	0.64329		Nervous System Diseases; Cardiovascular Diseases	1	Transporter	ALB	CURATED	213	DTO_05007405	2006	0.962	C0917798	P02768	Pathologic Function	Cerebral Ischemia	C10;C14	0.3	2006	0.317
disease	0.15499		Nervous System Diseases; Cardiovascular Diseases	1	Enzyme	SOD2	CURATED	6648	DTO_05007624	2009	0.923	C0917798	P04179	Pathologic Function	Cerebral Ischemia	C10;C14	0.3	2004	0.379
group	0.64329		Nervous System Diseases; Cardiovascular Diseases	0.958	Transporter	ALB	CURATED	213	DTO_05007405	2020	0.962	C0038454	P02768	Disease or Syndrome	Cerebrovascular accident	C10;C14	0.4	1998	0.317
disease	0.17259		Congenital, Hereditary, and Neonatal Diseases and Abnormalities; Nutritional and Metabolic Diseases; Nervous System Diseases	1		TFAM	CURATED	7019		2011	0.731	C2931673	Q00059	Disease or Syndrome	Ceroid lipofuscinosis, neuronal 1, infantile	C16;C18;C10	0.3	2011	0.529
disease	0.65372		Neoplasms; Female Urogenital Diseases and Pregnancy Complications	1	Kinase	JAK2	CURATED	3717	DTO_03300101	2019	0.885	C4048328	O60674	Neoplastic Process	cervical cancer	C04;C13	0.33	2014	0.385
disease	4.5964e-29		Nervous System Diseases	1	Ion channel	TRPM8	CURATED	79054	DTO_01300327	2011	0.808	C0007852	Q7Z2W7	Disease or Syndrome	Cervical Migraine Syndrome	C10	0.3	2011	0.553
disease	0.030182		Digestive System Diseases; Chemically-Induced Disorders	1	Nuclear receptor	PPARA	CURATED	5465	DTO_00102000	2014	0.885	C4277682	Q07869	Disease or Syndrome	Chemical and Drug Induced Liver Injury	C06;C25	0.3	2014	0.432
disease	0.64329		Digestive System Diseases; Chemically-Induced Disorders	1	Transporter	ALB	CURATED	213	DTO_05007405	2012	0.962	C4277682	P02768	Disease or Syndrome	Chemical and Drug Induced Liver Injury	C06;C25	0.3	2008	0.317
disease	0.00054909		Digestive System Diseases; Chemically-Induced Disorders	1		APOA1	CURATED	335		2005	0.885	C4277682	P02647	Disease or Syndrome	Chemical and Drug Induced Liver Injury	C06;C25	0.3	2005	0.429
disease	0.0018685		Digestive System Diseases; Chemically-Induced Disorders	1		APOE	CURATED	348		2005	0.962	C4277682	P02649	Disease or Syndrome	Chemical and Drug Induced Liver Injury	C06;C25	0.3	2005	0.338
disease	0.0036969		Digestive System Diseases; Chemically-Induced Disorders	1		CRP	CURATED	1401		2015	0.962	C4277682	P02741	Disease or Syndrome	Chemical and Drug Induced Liver Injury	C06;C25	0.3	2015	0.299
disease	0.0011573		Digestive System Diseases; Chemically-Induced Disorders	1		GOT1	CURATED	2805		2014	0.692	C4277682	P17174	Disease or Syndrome	Chemical and Drug Induced Liver Injury	C06;C25	0.3	2014	0.601
disease	0.010345		Digestive System Diseases; Chemically-Induced Disorders	1	Enzyme	PLG	CURATED	5340	DTO_05007624	2012	0.923	C4277682	P00747	Disease or Syndrome	Chemical and Drug Induced Liver Injury	C06;C25	0.3	2012	0.389
disease	0.15499		Digestive System Diseases; Chemically-Induced Disorders	1	Enzyme	SOD2	CURATED	6648	DTO_05007624	2014	0.923	C4277682	P04179	Disease or Syndrome	Chemical and Drug Induced Liver Injury	C06;C25	0.3	2014	0.379
disease	7.2668e-09		Digestive System Diseases; Chemically-Induced Disorders	1	Nuclear receptor	NR1I2	CURATED	8856	DTO_00102000	2017	0.846	C4277682	O75469	Disease or Syndrome	Chemical and Drug Induced Liver Injury	C06;C25	0.3	2010	0.418
disease	0.90374		Digestive System Diseases; Chemically-Induced Disorders	1	Nuclear receptor	NR1H3	CURATED	10062	DTO_00102000	2007	0.692	C4277682	Q13133	Disease or Syndrome	Chemical and Drug Induced Liver Injury	C06;C25	0.3	2007	0.566
disease	5.3634e-08		Digestive System Diseases; Chemically-Induced Disorders	1		UGT1A9	CURATED	54600		2011	0.577	C4277682	O60656	Disease or Syndrome	Chemical and Drug Induced Liver Injury	C06;C25	0.3	2011	0.59
disease	0.030182		Digestive System Diseases; Chemically-Induced Disorders	1	Nuclear receptor	PPARA	CURATED	5465	DTO_00102000	2014	0.885	C4279912	Q07869	Disease or Syndrome	Chemically-Induced Liver Toxicity	C06;C25	0.3	2014	0.432
disease	0.64329		Digestive System Diseases; Chemically-Induced Disorders	1	Transporter	ALB	CURATED	213	DTO_05007405	2012	0.962	C4279912	P02768	Disease or Syndrome	Chemically-Induced Liver Toxicity	C06;C25	0.3	2008	0.317
disease	0.00054909		Digestive System Diseases; Chemically-Induced Disorders	1		APOA1	CURATED	335		2005	0.885	C4279912	P02647	Disease or Syndrome	Chemically-Induced Liver Toxicity	C06;C25	0.3	2005	0.429
disease	0.0018685		Digestive System Diseases; Chemically-Induced Disorders	1		APOE	CURATED	348		2005	0.962	C4279912	P02649	Disease or Syndrome	Chemically-Induced Liver Toxicity	C06;C25	0.3	2005	0.338
disease	0.0036969		Digestive System Diseases; Chemically-Induced Disorders	1		CRP	CURATED	1401		2015	0.962	C4279912	P02741	Disease or Syndrome	Chemically-Induced Liver Toxicity	C06;C25	0.3	2015	0.299
disease	0.0011573		Digestive System Diseases; Chemically-Induced Disorders	1		GOT1	CURATED	2805		2014	0.692	C4279912	P17174	Disease or Syndrome	Chemically-Induced Liver Toxicity	C06;C25	0.3	2014	0.601
disease	1.9234e-16		Nutritional and Metabolic Diseases	0.955		APOB	CURATED	338		2018	0.808	C1862596	P04114	Disease or Syndrome	Familial hypobetalipoproteinemia	C18	0.5	1987	0.453
disease	3.5945e-19		Digestive System Diseases; Chemically-Induced Disorders	1	Enzyme	GPT	CURATED	2875	DTO_05007624	2009	0.923	C4279912	P24298	Disease or Syndrome	Chemically-Induced Liver Toxicity	C06;C25	0.3	1977	0.403
disease	0.010345		Digestive System Diseases; Chemically-Induced Disorders	1	Enzyme	PLG	CURATED	5340	DTO_05007624	2012	0.923	C4279912	P00747	Disease or Syndrome	Chemically-Induced Liver Toxicity	C06;C25	0.3	2012	0.389
disease	0.15499		Digestive System Diseases; Chemically-Induced Disorders	1	Enzyme	SOD2	CURATED	6648	DTO_05007624	2014	0.923	C4279912	P04179	Disease or Syndrome	Chemically-Induced Liver Toxicity	C06;C25	0.3	2014	0.379
disease	7.2668e-09		Digestive System Diseases; Chemically-Induced Disorders	1	Nuclear receptor	NR1I2	CURATED	8856	DTO_00102000	2017	0.846	C4279912	O75469	Disease or Syndrome	Chemically-Induced Liver Toxicity	C06;C25	0.3	2010	0.418
disease	0.00093892		Digestive System Diseases; Chemically-Induced Disorders	1	Nuclear receptor	NR1H4	CURATED	9971	DTO_00102000	2003	0.808	C4279912	Q96RI1	Disease or Syndrome	Chemically-Induced Liver Toxicity	C06;C25	0.3	2003	0.513
disease	0.90374		Digestive System Diseases; Chemically-Induced Disorders	1	Nuclear receptor	NR1H3	CURATED	10062	DTO_00102000	2007	0.692	C4279912	Q13133	Disease or Syndrome	Chemically-Induced Liver Toxicity	C06;C25	0.3	2007	0.566
disease	5.3634e-08		Digestive System Diseases; Chemically-Induced Disorders	1		UGT1A9	CURATED	54600		2011	0.577	C4279912	O60656	Disease or Syndrome	Chemically-Induced Liver Toxicity	C06;C25	0.3	2011	0.59
disease	0.99999		Mental Disorders	1		LRP2	CURATED	4036		2007	0.846	C0085996	P98164	Mental or Behavioral Dysfunction	Child Development Deviations	F03	0.3	2007	0.491
disease	0.99999		Mental Disorders	1		LRP2	CURATED	4036		2007	0.846	C0085997	P98164	Mental or Behavioral Dysfunction	Child Development Disorders, Specific	F03	0.3	2007	0.491
disease	3.0504e-07		Nervous System Diseases	1	Enzyme	ALDH5A1	CURATED	7915	DTO_05007624	2007	0.462	C0752202	P51649	Disease or Syndrome	Childhood Onset Dystonias	C10	0.3	2007	0.619
phenotype	0.00054909		Pathological Conditions, Signs and Symptoms; Nutritional and Metabolic Diseases	1		APOA1	CURATED	335		2014	0.885	C4521075	P02647	Finding	Childhood Overweight	C23;C18	0.3	2014	0.429
phenotype	1.1892e-23		Pathological Conditions, Signs and Symptoms; Nutritional and Metabolic Diseases	1		CETP	CURATED	1071		2014	0.731	C4521075	P11597	Finding	Childhood Overweight	C23;C18	0.3	2014	0.512
phenotype	5.5765e-10		Pathological Conditions, Signs and Symptoms; Nutritional and Metabolic Diseases	1		APOA5	CURATED	116519		2014	0.615	C4521075	Q6Q788	Finding	Childhood Overweight	C23;C18	0.3	2014	0.587
disease	0.90374		Digestive System Diseases	1	Nuclear receptor	NR1H3	CURATED	10062	DTO_00102000	2007	0.692	C0008370	Q13133	Disease or Syndrome	Cholestasis	C06	0.3	2007	0.566
disease	0.00093892		Digestive System Diseases; Female Urogenital Diseases and Pregnancy Complications	1	Nuclear receptor	NR1H4	CURATED	9971	DTO_00102000	2015	0.808	C0268318	Q96RI1	Disease or Syndrome	Cholestasis of pregnancy	C06;C13	0.35	2007	0.513
disease	0.64329		Digestive System Diseases	1	Transporter	ALB	CURATED	213	DTO_05007405	2018	0.962	C0005398	P02768	Disease or Syndrome	Cholestasis, Extrahepatic	C06	0.3	2018	0.317
disease	1.1892e-23		Congenital, Hereditary, and Neonatal Diseases and Abnormalities; Nutritional and Metabolic Diseases	0.923		CETP	CURATED	1071		2018	0.731	C0342883	P11597	Disease or Syndrome	Cholesteryl Ester Transfer Protein Deficiency	C16;C18	0.4	1989	0.512
disease	0.010024		Congenital, Hereditary, and Neonatal Diseases and Abnormalities; Nutritional and Metabolic Diseases	1		APOC3	CURATED	345		2014	0.731	C0342883	P02656	Disease or Syndrome	Cholesteryl Ester Transfer Protein Deficiency	C16;C18	0.32	1991	0.531
disease	0.066228		Neoplasms; Female Urogenital Diseases and Pregnancy Complications; Male Urogenital Diseases	1	Receptor	SCARB1	CURATED	949	DTO_05007575	2011	0.731	C1266042	Q8WTV0	Neoplastic Process	Chromophobe Renal Cell Carcinoma	C04;C13;C12	0.3	2011	0.559
disease	0.15499		Neoplasms; Female Urogenital Diseases and Pregnancy Complications; Male Urogenital Diseases	1	Enzyme	SOD2	CURATED	6648	DTO_05007624	2004	0.923	C1266042	P04179	Neoplastic Process	Chromophobe Renal Cell Carcinoma	C04;C13;C12	0.3	2004	0.379
disease	1			1		ARID1B	CURATED	57492		2012	0.846	C3150215	Q8NFD5	Disease or Syndrome	CHROMOSOME 6q24-q25 DELETION SYNDROME		0.3	2012	0.503
disease	0.64329		Respiratory Tract Diseases; Wounds and Injuries	1	Transporter	ALB	CURATED	213	DTO_05007405	2019	0.962	C2350344	P02768	Disease or Syndrome	Chronic Lung Injury	C08;C26	0.3	2019	0.317
disease	0.15499		Pathological Conditions, Signs and Symptoms; Nutritional and Metabolic Diseases; Eye Diseases; Musculoskeletal Diseases; Nervous System Diseases	1	Enzyme	SOD2	CURATED	6648	DTO_05007624	2003	0.923	C0162674	P04179	Disease or Syndrome	Chronic progressive external ophthalmoplegia	C23;C18;C11;C05;C10	0.32	2001	0.379
disease	9.841e-24		Infections	1		LDLR	CURATED	3949		2006	0.885	C1443892	P01130	Disease or Syndrome	Chronic Q Fever	C01	0.3	2006	0.449
disease	0.00093892	strong	Congenital, Hereditary, and Neonatal Diseases and Abnormalities	NA	Nuclear receptor	NR1H4	CURATED	9971	DTO_00102000	NA	0.808	C4277690	Q96RI1	Congenital Abnormality	Ciliopathies	C16	0.3	NA	0.513
disease	0.64329		Pathological Conditions, Signs and Symptoms	1	Transporter	ALB	CURATED	213	DTO_05007405	2020	0.962	C1623038	P02768	Disease or Syndrome	Cirrhosis	C23	0.4	1987	0.317
disease	0.0039011		Neoplasms; Nervous System Diseases	1		CST3	CURATED	1471		2010	0.808	C0431121	P01034	Neoplastic Process	Clear Cell Meningioma	C04;C10	0.3	2010	0.436
disease	1.6432e-05		Congenital, Hereditary, and Neonatal Diseases and Abnormalities; Musculoskeletal Diseases; Stomatognathic Diseases	1	Kinase	FGFR3	CURATED	2261	DTO_03300101	2007	0.846	C0008925	P22607	Congenital Abnormality	Cleft Palate	C16;C05;C07	0.4	2007	0.391
disease	0.0184		Congenital, Hereditary, and Neonatal Diseases and Abnormalities; Musculoskeletal Diseases; Stomatognathic Diseases	1	Signaling	FGF2	CURATED	2247	DTO_05007599	2007	0.923	C0008925	P09038	Congenital Abnormality	Cleft Palate	C16;C05;C07	0.3	2007	0.383
disease	0.0184		Congenital, Hereditary, and Neonatal Diseases and Abnormalities; Musculoskeletal Diseases; Stomatognathic Diseases	1	Signaling	FGF2	CURATED	2247	DTO_05007599	2007	0.923	C1837218	P09038	Congenital Abnormality	Cleft palate, isolated	C16;C05;C07	0.3	2007	0.383
disease	1.6432e-05		Congenital, Hereditary, and Neonatal Diseases and Abnormalities; Musculoskeletal Diseases; Stomatognathic Diseases	1	Kinase	FGFR3	CURATED	2261	DTO_03300101	2007	0.846	C1837218	P22607	Congenital Abnormality	Cleft palate, isolated	C16;C05;C07	0.3	2007	0.391
disease	0.0184		Congenital, Hereditary, and Neonatal Diseases and Abnormalities; Stomatognathic Diseases	1	Signaling	FGF2	CURATED	2247	DTO_05007599	2007	0.923	C0008924	P09038	Congenital Abnormality	Cleft upper lip	C16;C07	0.3	2007	0.383
disease	1.6432e-05		Congenital, Hereditary, and Neonatal Diseases and Abnormalities; Stomatognathic Diseases	1	Kinase	FGFR3	CURATED	2261	DTO_03300101	2007	0.846	C0008924	P22607	Congenital Abnormality	Cleft upper lip	C16;C07	0.3	2007	0.391
disease	0.0003636		Pathological Conditions, Signs and Symptoms; Nervous System Diseases	1	Enzyme	ALPL	CURATED	249	DTO_05007624	2016	0.769	C0234535	P05186	Disease or Syndrome	Clonic Seizures	C23;C10	0.3	1995	0.546
disease	0.0018685		Pathological Conditions, Signs and Symptoms; Nervous System Diseases	1		APOE	CURATED	348		2013	0.962	C0234535	P02649	Disease or Syndrome	Clonic Seizures	C23;C10	0.3	2013	0.338
disease	0.0184		Pathological Conditions, Signs and Symptoms; Nervous System Diseases	1	Signaling	FGF2	CURATED	2247	DTO_05007599	2011	0.923	C0234535	P09038	Disease or Syndrome	Clonic Seizures	C23;C10	0.3	2011	0.383
disease	0.15499		Pathological Conditions, Signs and Symptoms; Nervous System Diseases	1	Enzyme	SOD2	CURATED	6648	DTO_05007624	2010	0.923	C0234535	P04179	Disease or Syndrome	Clonic Seizures	C23;C10	0.3	2010	0.379
group	0.15499		Nervous System Diseases	1	Enzyme	SOD2	CURATED	6648	DTO_05007624	2000	0.923	C0007682	P04179	Disease or Syndrome	CNS disorder	C10	0.3	2000	0.379
disease	0.066228		Chemically-Induced Disorders; Mental Disorders	1	Receptor	SCARB1	CURATED	949	DTO_05007575	2006	0.731	C0009171	Q8WTV0	Mental or Behavioral Dysfunction	Cocaine Abuse	C25;F03	0.3	2006	0.559
disease	0.0184		Chemically-Induced Disorders; Mental Disorders	1	Signaling	FGF2	CURATED	2247	DTO_05007599	2009	0.923	C0009171	P09038	Mental or Behavioral Dysfunction	Cocaine Abuse	C25;F03	0.3	2009	0.383
disease	0.066228		Chemically-Induced Disorders; Mental Disorders	1	Receptor	SCARB1	CURATED	949	DTO_05007575	2006	0.731	C0600427	Q8WTV0	Mental or Behavioral Dysfunction	Cocaine Dependence	C25;F03	0.3	2006	0.559
disease	0.0184		Chemically-Induced Disorders; Mental Disorders	1	Signaling	FGF2	CURATED	2247	DTO_05007599	2009	0.923	C0600427	P09038	Mental or Behavioral Dysfunction	Cocaine Dependence	C25;F03	0.3	2009	0.383
disease	0.00091697		Chemically-Induced Disorders; Mental Disorders	1	G-protein coupled receptor	MC4R	CURATED	4160	DTO_02300001	2005	0.692	C0600427	P32245	Mental or Behavioral Dysfunction	Cocaine Dependence	C25;F03	0.3	2005	0.535
group	0.066228		Chemically-Induced Disorders; Mental Disorders	1	Receptor	SCARB1	CURATED	949	DTO_05007575	2006	0.731	C0236736	Q8WTV0	Mental or Behavioral Dysfunction	Cocaine-Related Disorders	C25;F03	0.3	2006	0.559
group	0.0184		Chemically-Induced Disorders; Mental Disorders	1	Signaling	FGF2	CURATED	2247	DTO_05007599	2009	0.923	C0236736	P09038	Mental or Behavioral Dysfunction	Cocaine-Related Disorders	C25;F03	0.3	2009	0.383
group	0.0018685		Mental Disorders	0.977		APOE	CURATED	348		2019	0.962	C0009241	P02649	Mental or Behavioral Dysfunction	Cognition Disorders	F03	0.4	1996	0.338
disease	0.066228		Neoplasms; Female Urogenital Diseases and Pregnancy Complications; Male Urogenital Diseases	1	Receptor	SCARB1	CURATED	949	DTO_05007575	2011	0.731	C1266044	Q8WTV0	Neoplastic Process	Collecting Duct Carcinoma of the Kidney	C04;C13;C12	0.3	2011	0.559
disease	0.15499		Neoplasms; Female Urogenital Diseases and Pregnancy Complications; Male Urogenital Diseases	1	Enzyme	SOD2	CURATED	6648	DTO_05007624	2004	0.923	C1266044	P04179	Neoplastic Process	Collecting Duct Carcinoma of the Kidney	C04;C13;C12	0.3	2004	0.379
group	0.15499		Digestive System Diseases; Neoplasms	1	Enzyme	SOD2	CURATED	6648	DTO_05007624	2014	0.923	C0009375	P04179	Neoplastic Process	Colonic Neoplasms	C06;C04	0.31	2007	0.379
group	1.2712e-09		Digestive System Diseases; Neoplasms	1	Enzyme	LPL	CURATED	4023	DTO_05007624	2004	0.808	C0009375	P06858	Neoplastic Process	Colonic Neoplasms	C06;C04	0.3	2004	0.474
group	1.4614e-22		Digestive System Diseases; Neoplasms	1	Transporter	SLC22A1	CURATED	6580	DTO_05007405	2004	0.731	C0009375	O15245	Neoplastic Process	Colonic Neoplasms	C06;C04	0.3	2004	0.556
group	5.321e-24		Digestive System Diseases; Neoplasms	1	Transporter	SLCO1B3	CURATED	28234	DTO_05007405	2014	0.769	C0009375	Q9NPD5	Neoplastic Process	Colonic Neoplasms	C06;C04	0.3	2012	0.592
disease	1.9234e-16		Digestive System Diseases; Neoplasms	1		APOB	CURATED	338		2017	0.808	C0009402	P04114	Neoplastic Process	Colorectal Carcinoma	C06;C04	0.31	2017	0.453
disease	9.934e-07		Digestive System Diseases; Neoplasms	0.889	Enzyme	ADH1B	CURATED	125	DTO_05007624	2018	0.846	C0009402	P00325	Neoplastic Process	Colorectal Carcinoma	C06;C04	0.39	2006	0.502
disease	1.9234e-16		Digestive System Diseases	1		APOB	CURATED	338		2018	0.808	C0015695	P04114	Disease or Syndrome	Fatty Liver	C06	0.7	2001	0.453
disease	0.030182		Digestive System Diseases	1	Nuclear receptor	PPARA	CURATED	5465	DTO_00102000	2020	0.885	C0015695	Q07869	Disease or Syndrome	Fatty Liver	C06	0.6	2005	0.432
disease	0.030182		Digestive System Diseases; Chemically-Induced Disorders	1	Nuclear receptor	PPARA	CURATED	5465	DTO_00102000	2018	0.885	C0015696	Q07869	Disease or Syndrome	Fatty Liver, Alcoholic	C06;C25	0.53	2006	0.432
disease	0.15499		Digestive System Diseases; Neoplasms	1	Enzyme	SOD2	CURATED	6648	DTO_05007624	2017	0.923	C0009402	P04179	Neoplastic Process	Colorectal Carcinoma	C06;C04	0.37	2000	0.379
disease	0.99999		Digestive System Diseases; Neoplasms	1		LRP2	CURATED	4036		2019	0.846	C0009402	P98164	Neoplastic Process	Colorectal Carcinoma	C06;C04	0.31	2019	0.491
disease	0.062391		Digestive System Diseases; Neoplasms	NA		SNX8	CURATED	29886		NA	0.231	C0009402	Q9Y5X2	Neoplastic Process	Colorectal Carcinoma	C06;C04	0.3	NA	0.792
group	9.934e-07		Digestive System Diseases; Neoplasms	1	Enzyme	ADH1B	CURATED	125	DTO_05007624	2008	0.846	C0009404	P00325	Neoplastic Process	Colorectal Neoplasms	C06;C04	0.32	2006	0.502
group	0.91029		Digestive System Diseases; Neoplasms	1	Enzyme modulator	IGFBP3	CURATED	3486	DTO_05007584	2011	0.808	C0009404	P17936	Neoplastic Process	Colorectal Neoplasms	C06;C04	0.32	2005	0.439
group	0.15499		Digestive System Diseases; Neoplasms	1	Enzyme	SOD2	CURATED	6648	DTO_05007624	2003	0.923	C0009404	P04179	Neoplastic Process	Colorectal Neoplasms	C06;C04	0.31	2000	0.379
group	5.321e-24		Digestive System Diseases; Neoplasms	1	Transporter	SLCO1B3	CURATED	28234	DTO_05007405	2018	0.769	C0009404	Q9NPD5	Neoplastic Process	Colorectal Neoplasms	C06;C04	0.31	2008	0.592
group	1.4525e-13		Digestive System Diseases; Neoplasms	1	Transporter	ABCA1	CURATED	19	DTO_05007405	2012	0.846	C0009404	O95477	Neoplastic Process	Colorectal Neoplasms	C06;C04	0.3	2012	0.467
group	1.6432e-05		Digestive System Diseases; Neoplasms	NA	Kinase	FGFR3	CURATED	2261	DTO_03300101	NA	0.846	C0009404	P22607	Neoplastic Process	Colorectal Neoplasms	C06;C04	0.3	NA	0.391
disease	0.0018685		Nervous System Diseases; Cardiovascular Diseases	1		APOE	CURATED	348		2006	0.962	C0751635	P02649	Disease or Syndrome	Common Carotid Artery Stenosis	C10;C14	0.3	2006	0.338
disease	4.5964e-29		Nervous System Diseases	1	Ion channel	TRPM8	CURATED	79054	DTO_01300327	2013	0.808	C0338480	Q7Z2W7	Disease or Syndrome	Common Migraine	C10	0.4	2012	0.553
disease	0.00091697		Nutritional and Metabolic Diseases	1	G-protein coupled receptor	MC4R	CURATED	4160	DTO_02300001	2012	0.692	C1257965	P32245	Disease or Syndrome	Compensatory Hyperinsulinemia	C18	0.3	2012	0.535
disease	0.0018685		Pathological Conditions, Signs and Symptoms; Nervous System Diseases	1		APOE	CURATED	348		2013	0.962	C0149958	P02649	Disease or Syndrome	Complex partial seizures	C23;C10	0.32	2005	0.338
disease	0.0003636		Pathological Conditions, Signs and Symptoms; Nervous System Diseases	1	Enzyme	ALPL	CURATED	249	DTO_05007624	2016	0.769	C0149958	P05186	Disease or Syndrome	Complex partial seizures	C23;C10	0.3	1995	0.546
disease	0.0184		Pathological Conditions, Signs and Symptoms; Nervous System Diseases	1	Signaling	FGF2	CURATED	2247	DTO_05007599	2011	0.923	C0149958	P09038	Disease or Syndrome	Complex partial seizures	C23;C10	0.3	2011	0.383
disease	0.15499		Pathological Conditions, Signs and Symptoms; Nervous System Diseases	1	Enzyme	SOD2	CURATED	6648	DTO_05007624	2010	0.923	C0149958	P04179	Disease or Syndrome	Complex partial seizures	C23;C10	0.3	2010	0.379
disease	0.15499		Neoplasms	1	Enzyme	SOD2	CURATED	6648	DTO_05007624	2012	0.923	C0282313	P04179	Neoplastic Process	Condition, Preneoplastic	C04	0.3	2005	0.379
disease	1.4921e-16		Congenital, Hereditary, and Neonatal Diseases and Abnormalities; Eye Diseases	1	Enzyme modulator	SAG	CURATED	6295	DTO_05007584	1995	0.731	C4041558	P10523	Disease or Syndrome	Cone-rod synaptic disorder, congenital nonprogressive	C16;C11	0.3	1995	0.57
disease	1		Pathological Conditions, Signs and Symptoms; Congenital, Hereditary, and Neonatal Diseases and Abnormalities	1	Receptor	IGF2R	CURATED	3482	DTO_05007575	2011	0.731	C0235833	P11717	Congenital Abnormality	Congenital diaphragmatic hernia	C23;C16	0.3	2010	0.518
disease	1		Pathological Conditions, Signs and Symptoms; Congenital, Hereditary, and Neonatal Diseases and Abnormalities	1	Receptor	IGF2R	CURATED	3482	DTO_05007575	2011	0.731	C0265700	P11717	Congenital Abnormality	Congenital hernia of foramen of Bochdalek	C23;C16	0.3	2010	0.518
disease	1		Pathological Conditions, Signs and Symptoms; Congenital, Hereditary, and Neonatal Diseases and Abnormalities	1	Receptor	IGF2R	CURATED	3482	DTO_05007575	2011	0.731	C0265699	P11717	Congenital Abnormality	Congenital hernia of foramen of Morgagni	C23;C16	0.3	2010	0.518
disease	1.6432e-05	strong	Congenital, Hereditary, and Neonatal Diseases and Abnormalities; Musculoskeletal Diseases	NA	Kinase	FGFR3	CURATED	2261	DTO_03300101	NA	0.846	C0685381	P22607	Congenital Abnormality	Congenital hypoplasia of radius	C16;C05	0.4	NA	0.391
disease	1.6432e-05	strong	Congenital, Hereditary, and Neonatal Diseases and Abnormalities; Otorhinolaryngologic Diseases	1	Kinase	FGFR3	CURATED	2261	DTO_03300101	2006	0.846	C0152423	P22607	Congenital Abnormality	Congenital small ears	C16;C09	0.4	2006	0.391
disease	0.64329		Cardiovascular Diseases	1	Transporter	ALB	CURATED	213	DTO_05007405	2020	0.962	C0018802	P02768	Disease or Syndrome	Congestive heart failure	C14	0.4	2001	0.317
disease	0.0036969		Cardiovascular Diseases	0.957		CRP	CURATED	1401		2020	0.962	C0018802	P02741	Disease or Syndrome	Congestive heart failure	C14	0.4	2005	0.299
disease	0.031714		Cardiovascular Diseases	1		APCS	CURATED	325		2005	0.808	C0018802	P02743	Disease or Syndrome	Congestive heart failure	C14	0.3	2005	0.531
disease	3.0491e-07		Skin and Connective Tissue Diseases	1		UGT1A6	CURATED	54578		2015	0.654	C0011616	P19224	Disease or Syndrome	Contact Dermatitis	C17	0.3	2015	0.56
disease	3.2577e-06		Skin and Connective Tissue Diseases	1		UGT1A1	CURATED	54658		2015	0.769	C0011616	P22309	Disease or Syndrome	Contact Dermatitis	C17	0.3	2015	0.464
phenotype	3.0491e-07		Skin and Connective Tissue Diseases	1		UGT1A6	CURATED	54578		2015	0.654	C0162351	P19224	Pathologic Function	Contact hypersensitivity	C17	0.3	2015	0.56
phenotype	3.2577e-06		Skin and Connective Tissue Diseases	1		UGT1A1	CURATED	54658		2015	0.769	C0162351	P22309	Pathologic Function	Contact hypersensitivity	C17	0.3	2015	0.464
disease	0.15499		Neoplasms; Female Urogenital Diseases and Pregnancy Complications; Male Urogenital Diseases	1	Enzyme	SOD2	CURATED	6648	DTO_05007624	2018	0.923	C0279702	P04179	Neoplastic Process	Conventional (Clear Cell) Renal Cell Carcinoma	C04;C13;C12	0.32	2004	0.379
disease	0.066228		Neoplasms; Female Urogenital Diseases and Pregnancy Complications; Male Urogenital Diseases	1	Receptor	SCARB1	CURATED	949	DTO_05007575	2015	0.731	C0279702	Q8WTV0	Neoplastic Process	Conventional (Clear Cell) Renal Cell Carcinoma	C04;C13;C12	0.31	2011	0.559
phenotype	0.0003636		Pathological Conditions, Signs and Symptoms; Nervous System Diseases	1	Enzyme	ALPL	CURATED	249	DTO_05007624	2016	0.769	C4048158	P05186	Sign or Symptom	Convulsions	C23;C10	0.3	1995	0.546
phenotype	0.0018685		Pathological Conditions, Signs and Symptoms; Nervous System Diseases	1		APOE	CURATED	348		2013	0.962	C4048158	P02649	Sign or Symptom	Convulsions	C23;C10	0.3	2013	0.338
phenotype	0.0184		Pathological Conditions, Signs and Symptoms; Nervous System Diseases	1	Signaling	FGF2	CURATED	2247	DTO_05007599	2011	0.923	C4048158	P09038	Sign or Symptom	Convulsions	C23;C10	0.3	2011	0.383
phenotype	0.15499		Pathological Conditions, Signs and Symptoms; Nervous System Diseases	1	Enzyme	SOD2	CURATED	6648	DTO_05007624	2010	0.923	C4048158	P04179	Sign or Symptom	Convulsions	C23;C10	0.3	2010	0.379
phenotype	0.0003636		Pathological Conditions, Signs and Symptoms; Nervous System Diseases	1	Enzyme	ALPL	CURATED	249	DTO_05007624	2016	0.769	C0751494	P05186	Sign or Symptom	Convulsive Seizures	C23;C10	0.3	1995	0.546
phenotype	0.0018685		Pathological Conditions, Signs and Symptoms; Nervous System Diseases	1		APOE	CURATED	348		2013	0.962	C0751494	P02649	Sign or Symptom	Convulsive Seizures	C23;C10	0.3	2013	0.338
phenotype	0.0184		Pathological Conditions, Signs and Symptoms; Nervous System Diseases	1	Signaling	FGF2	CURATED	2247	DTO_05007599	2011	0.923	C0751494	P09038	Sign or Symptom	Convulsive Seizures	C23;C10	0.3	2011	0.383
phenotype	0.15499		Pathological Conditions, Signs and Symptoms; Nervous System Diseases	1	Enzyme	SOD2	CURATED	6648	DTO_05007624	2010	0.923	C0751494	P04179	Sign or Symptom	Convulsive Seizures	C23;C10	0.3	2010	0.379
disease	0.00054909		Cardiovascular Diseases	0.935		APOA1	CURATED	335		2019	0.885	C0010054	P02647	Disease or Syndrome	Coronary Arteriosclerosis	C14	0.4	1986	0.429
disease	0.010024		Cardiovascular Diseases	1		APOC3	CURATED	345		2019	0.731	C0010054	P02656	Disease or Syndrome	Coronary Arteriosclerosis	C14	0.4	1997	0.531
disease	0.0036969		Cardiovascular Diseases	0.939		CRP	CURATED	1401		2020	0.962	C0010054	P02741	Disease or Syndrome	Coronary Arteriosclerosis	C14	0.4	1999	0.299
disease	9.841e-24		Cardiovascular Diseases	0.986		LDLR	CURATED	3949		2020	0.885	C0010054	P01130	Disease or Syndrome	Coronary Arteriosclerosis	C14	0.4	1988	0.449
disease	6.5917e-89		Cardiovascular Diseases	0.965	Enzyme	LPA	CURATED	4018	DTO_05007624	2019	0.769	C0010054	P08519	Disease or Syndrome	Coronary Arteriosclerosis	C14	0.4	1988	0.444
disease	5.5765e-10		Cardiovascular Diseases	0.973		APOA5	CURATED	116519		2019	0.615	C0010054	Q6Q788	Disease or Syndrome	Coronary Arteriosclerosis	C14	0.4	2001	0.587
disease	2.7059e-17		Cardiovascular Diseases	0.984	Enzyme	PCSK9	CURATED	255738	DTO_05007624	2020	0.808	C0010054	Q8NBP7	Disease or Syndrome	Coronary Arteriosclerosis	C14	0.4	2005	0.482
disease	0.00010289		Cardiovascular Diseases	1		SH2B3	CURATED	10019		2018	0.692	C0010054	Q9UQQ2	Disease or Syndrome	Coronary Arteriosclerosis	C14	0.33	2011	0.527
disease	0.031714		Cardiovascular Diseases	1		APCS	CURATED	325		2003	0.808	C0010054	P02743	Disease or Syndrome	Coronary Arteriosclerosis	C14	0.3	2003	0.531
disease	0.00054909		Cardiovascular Diseases	0.938		APOA1	CURATED	335		2019	0.885	C1956346	P02647	Disease or Syndrome	Coronary Artery Disease	C14	0.4	1986	0.429
disease	0.010024		Cardiovascular Diseases	1		APOC3	CURATED	345		2019	0.731	C1956346	P02656	Disease or Syndrome	Coronary Artery Disease	C14	0.4	1997	0.531
disease	0.0036969		Cardiovascular Diseases	0.947		CRP	CURATED	1401		2020	0.962	C1956346	P02741	Disease or Syndrome	Coronary Artery Disease	C14	0.4	1999	0.299
disease	3.081e-21		Cardiovascular Diseases	1	Transporter	ABCG5	CURATED	64240	DTO_05007405	2014	0.577	C1956346	Q9H222	Disease or Syndrome	Coronary Artery Disease	C14	0.32	2000	0.592
disease	0.31397		Neoplasms; Female Urogenital Diseases and Pregnancy Complications; Endocrine System Diseases	1		IHH	CURATED	3549		2011	0.538	C0010093	Q14623	Disease or Syndrome	Corpus Luteum Cyst	C04;C13;C19	0.3	2011	0.573
disease	9.841e-24		Infections	1		LDLR	CURATED	3949		2006	0.885	C2973787	P01130	Disease or Syndrome	Coxiella burnetii Infection	C01	0.3	2006	0.449
group	7.7723e-10		Infections	1	Transporter	SLC22A3	CURATED	6581	DTO_05007405	2011	0.846	C0010246	O75751	Disease or Syndrome	Coxsackievirus Infections	C01	0.3	2011	0.531
group	1.0376e-19		Congenital, Hereditary, and Neonatal Diseases and Abnormalities; Musculoskeletal Diseases	1	Enzyme modulator	HSPG2	CURATED	3339	DTO_05007584	1999	0.885	C0376634	P98160	Congenital Abnormality	Craniofacial Abnormalities	C16;C05	0.31	1999	0.438
group	0.99999		Congenital, Hereditary, and Neonatal Diseases and Abnormalities; Musculoskeletal Diseases	1		LRP2	CURATED	4036		2007	0.846	C0376634	P98164	Congenital Abnormality	Craniofacial Abnormalities	C16;C05	0.3	2007	0.491
disease	0.15499		Nervous System Diseases; Cardiovascular Diseases	1	Enzyme	SOD2	CURATED	6648	DTO_05007624	2001	0.923	C0751021	P04179	Disease or Syndrome	Crescendo Transient Ischemic Attacks	C10;C14	0.3	2001	0.379
disease	0.0036969		Digestive System Diseases	0.989		CRP	CURATED	1401		2020	0.962	C0010346	P02741	Disease or Syndrome	Crohn Disease	C06	0.4	2001	0.299
disease	0.030182		Digestive System Diseases	1	Nuclear receptor	PPARA	CURATED	5465	DTO_00102000	2011	0.885	C0010346	Q07869	Disease or Syndrome	Crohn Disease	C06	0.3	2011	0.432
disease	0.00093892		Digestive System Diseases	1	Nuclear receptor	NR1H4	CURATED	9971	DTO_00102000	2011	0.808	C0010346	Q96RI1	Disease or Syndrome	Crohn Disease	C06	0.3	2011	0.513
disease	0.030182		Digestive System Diseases	1	Nuclear receptor	PPARA	CURATED	5465	DTO_00102000	2011	0.885	C0156147	Q07869	Disease or Syndrome	Crohn's disease of large bowel	C06	0.3	2011	0.432
disease	0.00093892		Digestive System Diseases	1	Nuclear receptor	NR1H4	CURATED	9971	DTO_00102000	2012	0.808	C0156147	Q96RI1	Disease or Syndrome	Crohn's disease of large bowel	C06	0.32	2011	0.513
disease	0.0036969		Digestive System Diseases	1		CRP	CURATED	1401		2019	0.962	C0156147	P02741	Disease or Syndrome	Crohn's disease of large bowel	C06	0.31	2001	0.299
disease	0.96452		Digestive System Diseases	1		ATG16L1	CURATED	55054		2008	0.769	C0156147	Q676U5	Disease or Syndrome	Crohn's disease of large bowel	C06	0.3	2007	0.543
disease	0.030182		Digestive System Diseases	1	Nuclear receptor	PPARA	CURATED	5465	DTO_00102000	2011	0.885	C0267380	Q07869	Disease or Syndrome	Crohn's disease of the ileum	C06	0.3	2011	0.432
disease	0.0036969		Digestive System Diseases	1		CRP	CURATED	1401		2008	0.962	C0267380	P02741	Disease or Syndrome	Crohn's disease of the ileum	C06	0.31	2001	0.299
disease	0.96452		Digestive System Diseases	1		ATG16L1	CURATED	55054		2014	0.769	C0267380	Q676U5	Disease or Syndrome	Crohn's disease of the ileum	C06	0.31	2007	0.543
disease	0.00093892		Digestive System Diseases	1	Nuclear receptor	NR1H4	CURATED	9971	DTO_00102000	2011	0.808	C0267380	Q96RI1	Disease or Syndrome	Crohn's disease of the ileum	C06	0.3	2011	0.513
disease	0.0184		Nervous System Diseases	1	Signaling	FGF2	CURATED	2247	DTO_05007599	2005	0.923	C0751117	P09038	Disease or Syndrome	Cryptogenic Tonic-Clonic Epilepsy	C10	0.3	2005	0.383
disease	0.64329		Infections	1	Transporter	ALB	CURATED	213	DTO_05007405	2014	0.962	C4553297	P02768	Disease or Syndrome	Cystic Echinocccosis	C01	0.3	2014	0.317
disease	5.5303e-07		Congenital, Hereditary, and Neonatal Diseases and Abnormalities; Nutritional and Metabolic Diseases	NA	Enzyme	ACAT2	CURATED	39	DTO_05007624	NA	0.462	C0342735	Q9BWD1	Disease or Syndrome	Cytosolic acetoacetyl-CoA thiolase deficiency	C16;C18	0.3	NA	0.686
phenotype	0.010345	strong		NA	Enzyme	PLG	CURATED	5340	DTO_05007624	NA	0.923	C4280715	P00747	Finding	Decreased level of plasminogen		0.4	NA	0.389
disease	0.010345		Cardiovascular Diseases	1	Enzyme	PLG	CURATED	5340	DTO_05007624	2019	0.923	C0149871	P00747	Disease or Syndrome	Deep Vein Thrombosis	C14	0.36	1981	0.389
disease	0.65372		Cardiovascular Diseases	1	Kinase	JAK2	CURATED	3717	DTO_03300101	2015	0.885	C0149871	O60674	Disease or Syndrome	Deep Vein Thrombosis	C14	0.32	2009	0.385
disease	6.5917e-89		Cardiovascular Diseases	1	Enzyme	LPA	CURATED	4018	DTO_05007624	2017	0.769	C0149871	P08519	Disease or Syndrome	Deep Vein Thrombosis	C14	0.32	1997	0.444
group	0.15499		Nervous System Diseases	1	Enzyme	SOD2	CURATED	6648	DTO_05007624	2005	0.923	C0270715	P04179	Disease or Syndrome	Degenerative Diseases, Central Nervous System	C10	0.3	2000	0.379
group	0.15499		Nervous System Diseases	1	Enzyme	SOD2	CURATED	6648	DTO_05007624	2005	0.923	C0751733	P04179	Disease or Syndrome	Degenerative Diseases, Spinal Cord	C10	0.3	2000	0.379
disease	0.17989		Musculoskeletal Diseases	1	Cellular structure	EZR	CURATED	7430	DTO_05007530	2009	0.808	C0029408	P15311	Disease or Syndrome	Degenerative polyarthritis	C05	0.3	2009	0.476
disease	3.9379e-21		Pathological Conditions, Signs and Symptoms; Congenital, Hereditary, and Neonatal Diseases and Abnormalities; Nutritional and Metabolic Diseases; Female Urogenital Diseases and Pregnancy Complications; Immune System Diseases; Hemic and Lymphatic Diseases	NA	Ion channel	PIEZO1	CURATED	9780	DTO_01300327	NA	0.769	C1863769	Q92508	Disease or Syndrome	Dehydrated Hereditary Stomatocytosis, Pseudohyperkalemia, and Perinatal Edema	C23;C16;C18;C13;C20;C15	0.3	NA	0.552
phenotype	0.64329		Immune System Diseases	1	Transporter	ALB	CURATED	213	DTO_05007405	2009	0.962	C0020522	P02768	Pathologic Function	Delayed Hypersensitivity	C20	0.3	2009	0.317
disease	0.99985		Nervous System Diseases; Mental Disorders; Occupational Diseases	1	Nuclear receptor	RORC	CURATED	6097	DTO_00102000	2014	0.769	C0393770	P51449	Disease or Syndrome	Delayed Sleep Phase Syndrome	C10;F03;C24	0.3	2014	0.576
disease	0.0018685		Pathological Conditions, Signs and Symptoms; Nervous System Diseases; Mental Disorders; Behavior and Behavior Mechanisms	0.4		APOE	CURATED	348		2020	0.962	C0011206	P02649	Mental or Behavioral Dysfunction	Delirium	C23;C10;F03;F01	0.4	2007	0.338
disease	1.134e-08	limited	Congenital, Hereditary, and Neonatal Diseases and Abnormalities; Stomatognathic Diseases	NA		TDP2	CURATED	51567		NA	0.462	C2973527	O95551	Disease or Syndrome	Dentinogenesis imperfecta without osteogenesis imperfecta	C16;C07	0.3	NA	0.628
phenotype	0.0036969		Behavior and Behavior Mechanisms	1		CRP	CURATED	1401		2020	0.962	C0344315	P02741	Mental or Behavioral Dysfunction	Depressed mood	F01	0.4	2009	0.299
disease	0.64329		Mental Disorders	1	Transporter	ALB	CURATED	213	DTO_05007405	1996	0.962	C0282126	P02768	Mental or Behavioral Dysfunction	Depression, Neurotic	F03	0.3	1996	0.317
disease	0.0184		Mental Disorders	1	Signaling	FGF2	CURATED	2247	DTO_05007599	2006	0.923	C0282126	P09038	Mental or Behavioral Dysfunction	Depression, Neurotic	F03	0.3	2006	0.383
disease	0.64329		Mental Disorders	1	Transporter	ALB	CURATED	213	DTO_05007405	2020	0.962	C0011581	P02768	Mental or Behavioral Dysfunction	Depressive disorder	F03	0.37	1996	0.317
disease	0.030057		Mental Disorders	0.667	Signaling	GH1	CURATED	2688	DTO_05007599	2019	0.923	C0011581	P01241	Mental or Behavioral Dysfunction	Depressive disorder	F03	0.32	1996	0.373
disease	0.15499		Mental Disorders	1	Enzyme	SOD2	CURATED	6648	DTO_05007624	2018	0.923	C0011581	P04179	Mental or Behavioral Dysfunction	Depressive disorder	F03	0.32	2012	0.379
disease	0.00091697		Mental Disorders	1	G-protein coupled receptor	MC4R	CURATED	4160	DTO_02300001	2019	0.692	C0011581	P32245	Mental or Behavioral Dysfunction	Depressive disorder	F03	0.31	2008	0.535
phenotype	8.5042e-14		Behavior and Behavior Mechanisms	1	Enzyme	SYNJ2	CURATED	8871	DTO_05007624	2012	0.577	C0086132	O15056	Sign or Symptom	Depressive Symptoms	F01	0.31	2012	0.691
disease	0.64329		Mental Disorders	1	Transporter	ALB	CURATED	213	DTO_05007405	1996	0.962	C0086133	P02768	Mental or Behavioral Dysfunction	Depressive Syndrome	F03	0.3	1996	0.317
disease	0.0184		Mental Disorders	1	Signaling	FGF2	CURATED	2247	DTO_05007599	2006	0.923	C0086133	P09038	Mental or Behavioral Dysfunction	Depressive Syndrome	F03	0.3	2006	0.383
disease	0.030182		Congenital, Hereditary, and Neonatal Diseases and Abnormalities; Skin and Connective Tissue Diseases; Immune System Diseases	1	Nuclear receptor	PPARA	CURATED	5465	DTO_00102000	2018	0.885	C0011615	Q07869	Disease or Syndrome	Dermatitis, Atopic	C16;C17;C20	0.37	2007	0.432
disease	2.5e-06		Skin and Connective Tissue Diseases	1	Immune response	HLA-DPA1	CURATED	3113	DTO_05007608	2016	0.846	C0162823	P20036	Disease or Syndrome	Dermatitis, Irritant	C17	0.3	2016	0.552
group	0.15499		Skin and Connective Tissue Diseases	1	Enzyme	SOD2	CURATED	6648	DTO_05007624	2006	0.923	C0037274	P04179	Disease or Syndrome	Dermatologic disorders	C17	0.3	2006	0.379
phenotype	0.00054909		Pathological Conditions, Signs and Symptoms	1		APOA1	CURATED	335		2011	0.885	C0079221	P02647	Diagnostic Procedure	Determination of Death	C23	0.3	2011	0.429
phenotype	3.4212e-10		Pathological Conditions, Signs and Symptoms; Nervous System Diseases; Mental Disorders	1		POR	CURATED	5447		2012	0.769	C1330966	P16435	Finding	Developmental Academic Disorder	C23;C10;F03	0.3	2012	0.502
group	0.99999		Mental Disorders	1		LRP2	CURATED	4036		2007	0.846	C0008073	P98164	Mental or Behavioral Dysfunction	Developmental Disabilities	F03	0.3	2007	0.491
group	7.2668e-09		Nutritional and Metabolic Diseases; Endocrine System Diseases	1	Nuclear receptor	NR1I2	CURATED	8856	DTO_00102000	2020	0.846	C0011849	O75469	Disease or Syndrome	Diabetes Mellitus	C18;C19	0.4	2010	0.418
disease	0.030182		Nutritional and Metabolic Diseases; Endocrine System Diseases	1	Nuclear receptor	PPARA	CURATED	5465	DTO_00102000	2013	0.885	C0011853	Q07869	Experimental Model of Disease	Diabetes Mellitus, Experimental	C18;C19	0.3	2003	0.432
disease	3.7625e-18		Nutritional and Metabolic Diseases; Endocrine System Diseases	1	Kinase	PFKM	CURATED	5213	DTO_03300101	2004	0.5	C0011853	P08237	Experimental Model of Disease	Diabetes Mellitus, Experimental	C18;C19	0.3	2004	0.666
disease	0.0036969		Nutritional and Metabolic Diseases; Immune System Diseases; Endocrine System Diseases	1		CRP	CURATED	1401		2019	0.962	C0011854	P02741	Disease or Syndrome	Diabetes Mellitus, Insulin-Dependent	C18;C20;C19	0.4	2007	0.299
disease	0.0036969		Nutritional and Metabolic Diseases; Immune System Diseases; Endocrine System Diseases	1		CRP	CURATED	1401		2010	0.962	C3837958	P02741	Disease or Syndrome	Diabetes Mellitus, Ketosis-Prone	C18;C20;C19	0.3	2010	0.299
disease	0.00010289		Nutritional and Metabolic Diseases; Immune System Diseases; Endocrine System Diseases	1		SH2B3	CURATED	10019		2018	0.692	C3837958	Q9UQQ2	Disease or Syndrome	Diabetes Mellitus, Ketosis-Prone	C18;C20;C19	0.3	2018	0.527
disease	0.030182		Nutritional and Metabolic Diseases; Endocrine System Diseases	0.966	Nuclear receptor	PPARA	CURATED	5465	DTO_00102000	2020	0.885	C0011860	Q07869	Disease or Syndrome	Diabetes Mellitus, Non-Insulin-Dependent	C18;C19	0.4	2000	0.432
disease	1.2538e-06		Nutritional and Metabolic Diseases; Endocrine System Diseases	0.965		SHBG	CURATED	6462		2019	0.808	C0011860	P04278	Disease or Syndrome	Diabetes Mellitus, Non-Insulin-Dependent	C18;C19	0.4	2000	0.438
disease	0.15499		Nutritional and Metabolic Diseases; Endocrine System Diseases	0.941	Enzyme	SOD2	CURATED	6648	DTO_05007624	2019	0.923	C0011860	P04179	Disease or Syndrome	Diabetes Mellitus, Non-Insulin-Dependent	C18;C19	0.4	2004	0.379
disease	0.0036969		Nutritional and Metabolic Diseases; Immune System Diseases; Endocrine System Diseases	1		CRP	CURATED	1401		2010	0.962	C4554117	P02741	Disease or Syndrome	Diabetes Mellitus, Sudden-Onset	C18;C20;C19	0.3	2010	0.299
disease	0.00010289		Nutritional and Metabolic Diseases; Immune System Diseases; Endocrine System Diseases	1		SH2B3	CURATED	10019		2018	0.692	C4554117	Q9UQQ2	Disease or Syndrome	Diabetes Mellitus, Sudden-Onset	C18;C20;C19	0.3	2018	0.527
disease	0.00010289		Nutritional and Metabolic Diseases; Immune System Diseases; Endocrine System Diseases	1		SH2B3	CURATED	10019		2018	0.692	C0205734	Q9UQQ2	Disease or Syndrome	Diabetes, Autoimmune	C18;C20;C19	0.31	2011	0.527
disease	0.0036969		Nutritional and Metabolic Diseases; Immune System Diseases; Endocrine System Diseases	1		CRP	CURATED	1401		2010	0.962	C0205734	P02741	Disease or Syndrome	Diabetes, Autoimmune	C18;C20;C19	0.3	2010	0.299
disease	0.64329		Endocrine System Diseases; Cardiovascular Diseases	1	Transporter	ALB	CURATED	213	DTO_05007405	2010	0.962	C0011875	P02768	Disease or Syndrome	Diabetic Angiopathies	C19;C14	0.3	2010	0.317
disease	0.00054909		Endocrine System Diseases; Cardiovascular Diseases	1		APOA1	CURATED	335		2008	0.885	C0853897	P02647	Disease or Syndrome	Diabetic Cardiomyopathies	C19;C14	0.31	2008	0.429
disease	0.15499		Female Urogenital Diseases and Pregnancy Complications; Male Urogenital Diseases; Endocrine System Diseases	1	Enzyme	SOD2	CURATED	6648	DTO_05007624	2019	0.923	C0011881	P04179	Disease or Syndrome	Diabetic Nephropathy	C13;C12;C19	0.37	2007	0.379
disease	0.0036969		Eye Diseases; Endocrine System Diseases; Cardiovascular Diseases	1		CRP	CURATED	1401		2015	0.962	C0011884	P02741	Disease or Syndrome	Diabetic Retinopathy	C11;C19;C14	0.32	2009	0.299
phenotype	0.99999		Pathological Conditions, Signs and Symptoms	1		LRP2	CURATED	4036		2014	0.846	C0019284	P98164	Disease or Syndrome	Diaphragmatic Hernia	C23	0.31	2007	0.491
phenotype	0.0184		Pathological Conditions, Signs and Symptoms	1	Signaling	FGF2	CURATED	2247	DTO_05007599	2000	0.923	C0019284	P09038	Disease or Syndrome	Diaphragmatic Hernia	C23	0.3	2000	0.383
disease	0.96926		Neoplasms; Immune System Diseases; Hemic and Lymphatic Diseases	1		NECTIN2	CURATED	5819		2016	0.769	C0079744	Q92692	Neoplastic Process	Diffuse Large B-Cell Lymphoma	C04;C20;C15	0.31	2016	0.575
disease	0.15499		Neoplasms; Immune System Diseases; Hemic and Lymphatic Diseases	1	Enzyme	SOD2	CURATED	6648	DTO_05007624	2005	0.923	C0079744	P04179	Neoplastic Process	Diffuse Large B-Cell Lymphoma	C04;C20;C15	0.31	2003	0.379
phenotype	1.006e-05		Cardiovascular Diseases	1		NPR3	CURATED	4883		1999	0.615	C0265004	P17342	Disease or Syndrome	Dilatation of aorta	C14	0.3	1999	0.633
phenotype	3.2577e-06		Pathological Conditions, Signs and Symptoms; Congenital, Hereditary, and Neonatal Diseases and Abnormalities	1		UGT1A1	CURATED	54658		2017	0.769	C1565885	P22309	Disease or Syndrome	Direct Hyperbilirubinemia, Neonatal	C23;C16	0.3	2017	0.464
phenotype	0.0018685		Pathological Conditions, Signs and Symptoms	1		APOE	CURATED	348		2014	0.962	C0235874	P02649	Finding	Disease Exacerbation	C23	0.3	2014	0.338
phenotype	0.0184		Pathological Conditions, Signs and Symptoms	1	Signaling	FGF2	CURATED	2247	DTO_05007599	2003	0.923	C0235874	P09038	Finding	Disease Exacerbation	C23	0.3	2003	0.383
phenotype	0.15499		Pathological Conditions, Signs and Symptoms	1	Enzyme	SOD2	CURATED	6648	DTO_05007624	2012	0.923	C0235874	P04179	Finding	Disease Exacerbation	C23	0.3	2000	0.379
group	1.4921e-16	limited	Eye Diseases	NA	Enzyme modulator	SAG	CURATED	6295	DTO_05007584	NA	0.731	C0015397	P10523	Disease or Syndrome	Disorder of eye	C11	0.3	NA	0.57
phenotype	0.31397		Congenital, Hereditary, and Neonatal Diseases and Abnormalities; Musculoskeletal Diseases; Endocrine System Diseases	NA		IHH	CURATED	3549		NA	0.538	C0878659	Q14623	Finding	Disproportionate short stature	C16;C05;C19	0.4	NA	0.573
phenotype	4.2042e-05		Congenital, Hereditary, and Neonatal Diseases and Abnormalities; Musculoskeletal Diseases; Endocrine System Diseases	NA	Kinase	NPR2	CURATED	4882	DTO_03300101	NA	0.615	C0878659	P20594	Finding	Disproportionate short stature	C16;C05;C19	0.4	NA	0.573
phenotype	1.6432e-05		Congenital, Hereditary, and Neonatal Diseases and Abnormalities; Musculoskeletal Diseases; Endocrine System Diseases	NA	Kinase	FGFR3	CURATED	2261	DTO_03300101	NA	0.846	C0878659	P22607	Finding	Disproportionate short stature	C16;C05;C19	0.3	NA	0.391
phenotype	1.0376e-19		Congenital, Hereditary, and Neonatal Diseases and Abnormalities; Musculoskeletal Diseases; Endocrine System Diseases	NA	Enzyme modulator	HSPG2	CURATED	3339	DTO_05007584	NA	0.885	C0878659	P98160	Finding	Disproportionate short stature	C16;C05;C19	0.3	NA	0.438
phenotype	0.5503		Congenital, Hereditary, and Neonatal Diseases and Abnormalities; Musculoskeletal Diseases; Endocrine System Diseases	NA	Kinase	DDR2	CURATED	4921	DTO_03300101	NA	0.769	C0878659	Q16832	Finding	Disproportionate short stature	C16;C05;C19	0.3	NA	0.541
phenotype	2.8542e-22		Congenital, Hereditary, and Neonatal Diseases and Abnormalities; Musculoskeletal Diseases; Endocrine System Diseases	NA		ANO5	CURATED	203859		NA	0.538	C0878659	Q75V66	Finding	Disproportionate short stature	C16;C05;C19	0.3	NA	0.619
group	7.7723e-10		Chemically-Induced Disorders; Mental Disorders	1	Transporter	SLC22A3	CURATED	6581	DTO_05007405	2018	0.846	C0013146	O75751	Mental or Behavioral Dysfunction	Drug abuse	C25;F03	0.31	2006	0.531
group	7.7723e-10		Chemically-Induced Disorders; Mental Disorders	1	Transporter	SLC22A3	CURATED	6581	DTO_05007405	2006	0.846	C1510472	O75751	Mental or Behavioral Dysfunction	Drug Dependence	C25;F03	0.3	2006	0.531
group	0.00054909		Skin and Connective Tissue Diseases; Immune System Diseases; Chemically-Induced Disorders	1		APOA1	CURATED	335		2010	0.885	C0011609	P02647	Disease or Syndrome	Drug Eruptions	C17;C20;C25	0.3	2010	0.429
group	0.010024		Skin and Connective Tissue Diseases; Immune System Diseases; Chemically-Induced Disorders	1		APOC3	CURATED	345		2010	0.731	C0011609	P02656	Disease or Syndrome	Drug Eruptions	C17;C20;C25	0.3	2010	0.531
phenotype	7.7723e-10		Chemically-Induced Disorders; Mental Disorders	1	Transporter	SLC22A3	CURATED	6581	DTO_05007405	2006	0.846	C0013170	O75751	Mental or Behavioral Dysfunction	Drug habituation	C25;F03	0.3	2006	0.531
group	0.030182		Chemically-Induced Disorders	1	Nuclear receptor	PPARA	CURATED	5465	DTO_00102000	2010	0.885	C0013221	Q07869	Injury or Poisoning	Drug toxicity	C25	0.3	2010	0.432
group	0.64329		Chemically-Induced Disorders	1	Transporter	ALB	CURATED	213	DTO_05007405	2017	0.962	C0013221	P02768	Injury or Poisoning	Drug toxicity	C25	0.3	2014	0.317
group	0.0039011		Chemically-Induced Disorders	1		CST3	CURATED	1471		2017	0.808	C0013221	P01034	Injury or Poisoning	Drug toxicity	C25	0.3	2017	0.436
group	0.010345		Chemically-Induced Disorders	1	Enzyme	PLG	CURATED	5340	DTO_05007624	2017	0.923	C0013221	P00747	Injury or Poisoning	Drug toxicity	C25	0.3	2017	0.389
group	1.1086e-21		Chemically-Induced Disorders	1	Transporter	SLCO1B1	CURATED	10599	DTO_05007405	2011	0.731	C0013221	Q9Y6L6	Injury or Poisoning	Drug toxicity	C25	0.3	2011	0.538
group	3.2577e-06		Chemically-Induced Disorders	1		UGT1A1	CURATED	54658		2010	0.769	C0013221	P22309	Injury or Poisoning	Drug toxicity	C25	0.3	2010	0.464
group	7.7723e-10		Chemically-Induced Disorders; Mental Disorders	1	Transporter	SLC22A3	CURATED	6581	DTO_05007405	2006	0.846	C0013222	O75751	Mental or Behavioral Dysfunction	Drug Use Disorders	C25;F03	0.3	2006	0.531
phenotype	0.0036969		Chemically-Induced Disorders; Mental Disorders	1		CRP	CURATED	1401		2003	0.962	C0086189	P02741	Sign or Symptom	Drug Withdrawal Symptoms	C25;F03	0.3	2003	0.299
disease	0.030182		Digestive System Diseases; Chemically-Induced Disorders	1	Nuclear receptor	PPARA	CURATED	5465	DTO_00102000	2014	0.885	C3658290	Q07869	Disease or Syndrome	Drug-Induced Acute Liver Injury	C06;C25	0.3	2014	0.432
disease	0.64329		Digestive System Diseases; Chemically-Induced Disorders	1	Transporter	ALB	CURATED	213	DTO_05007405	2012	0.962	C3658290	P02768	Disease or Syndrome	Drug-Induced Acute Liver Injury	C06;C25	0.3	2008	0.317
disease	0.00054909		Digestive System Diseases; Chemically-Induced Disorders	1		APOA1	CURATED	335		2005	0.885	C3658290	P02647	Disease or Syndrome	Drug-Induced Acute Liver Injury	C06;C25	0.3	2005	0.429
disease	0.0018685		Digestive System Diseases; Chemically-Induced Disorders	1		APOE	CURATED	348		2005	0.962	C3658290	P02649	Disease or Syndrome	Drug-Induced Acute Liver Injury	C06;C25	0.3	2005	0.338
disease	0.0036969		Digestive System Diseases; Chemically-Induced Disorders	1		CRP	CURATED	1401		2015	0.962	C3658290	P02741	Disease or Syndrome	Drug-Induced Acute Liver Injury	C06;C25	0.3	2015	0.299
disease	0.0011573		Digestive System Diseases; Chemically-Induced Disorders	1		GOT1	CURATED	2805		2014	0.692	C3658290	P17174	Disease or Syndrome	Drug-Induced Acute Liver Injury	C06;C25	0.3	2014	0.601
disease	3.5945e-19		Digestive System Diseases; Chemically-Induced Disorders	1	Enzyme	GPT	CURATED	2875	DTO_05007624	2009	0.923	C3658290	P24298	Disease or Syndrome	Drug-Induced Acute Liver Injury	C06;C25	0.3	1977	0.403
disease	0.010345		Digestive System Diseases; Chemically-Induced Disorders	1	Enzyme	PLG	CURATED	5340	DTO_05007624	2012	0.923	C3658290	P00747	Disease or Syndrome	Drug-Induced Acute Liver Injury	C06;C25	0.3	2012	0.389
disease	0.15499		Digestive System Diseases; Chemically-Induced Disorders	1	Enzyme	SOD2	CURATED	6648	DTO_05007624	2014	0.923	C3658290	P04179	Disease or Syndrome	Drug-Induced Acute Liver Injury	C06;C25	0.3	2014	0.379
disease	7.2668e-09		Digestive System Diseases; Chemically-Induced Disorders	1	Nuclear receptor	NR1I2	CURATED	8856	DTO_00102000	2017	0.846	C3658290	O75469	Disease or Syndrome	Drug-Induced Acute Liver Injury	C06;C25	0.3	2010	0.418
disease	0.00093892		Digestive System Diseases; Chemically-Induced Disorders	1	Nuclear receptor	NR1H4	CURATED	9971	DTO_00102000	2003	0.808	C3658290	Q96RI1	Disease or Syndrome	Drug-Induced Acute Liver Injury	C06;C25	0.3	2003	0.513
disease	0.90374		Digestive System Diseases; Chemically-Induced Disorders	1	Nuclear receptor	NR1H3	CURATED	10062	DTO_00102000	2007	0.692	C3658290	Q13133	Disease or Syndrome	Drug-Induced Acute Liver Injury	C06;C25	0.3	2007	0.566
disease	5.3634e-08		Digestive System Diseases; Chemically-Induced Disorders	1		UGT1A9	CURATED	54600		2011	0.577	C3658290	O60656	Disease or Syndrome	Drug-Induced Acute Liver Injury	C06;C25	0.3	2011	0.59
phenotype	3.5945e-19		Digestive System Diseases; Chemically-Induced Disorders	1	Enzyme	GPT	CURATED	2875	DTO_05007624	2020	0.923	C0860207	P24298	Disease or Syndrome	Drug-Induced Liver Disease	C06;C25	0.4	1977	0.403
phenotype	0.030182		Digestive System Diseases; Chemically-Induced Disorders	1	Nuclear receptor	PPARA	CURATED	5465	DTO_00102000	2019	0.885	C0860207	Q07869	Disease or Syndrome	Drug-Induced Liver Disease	C06;C25	0.31	2014	0.432
phenotype	7.2668e-09		Digestive System Diseases; Chemically-Induced Disorders	1	Nuclear receptor	NR1I2	CURATED	8856	DTO_00102000	2019	0.846	C0860207	O75469	Disease or Syndrome	Drug-Induced Liver Disease	C06;C25	0.36	2010	0.418
phenotype	0.64329		Digestive System Diseases; Chemically-Induced Disorders	1	Transporter	ALB	CURATED	213	DTO_05007405	2019	0.962	C0860207	P02768	Disease or Syndrome	Drug-Induced Liver Disease	C06;C25	0.33	2008	0.317
phenotype	0.00054909		Digestive System Diseases; Chemically-Induced Disorders	1		APOA1	CURATED	335		2017	0.885	C0860207	P02647	Disease or Syndrome	Drug-Induced Liver Disease	C06;C25	0.32	2005	0.429
phenotype	0.0018685		Digestive System Diseases; Chemically-Induced Disorders	1		APOE	CURATED	348		2012	0.962	C0860207	P02649	Disease or Syndrome	Drug-Induced Liver Disease	C06;C25	0.31	2005	0.338
phenotype	0.0036969		Digestive System Diseases; Chemically-Induced Disorders	1		CRP	CURATED	1401		2019	0.962	C0860207	P02741	Disease or Syndrome	Drug-Induced Liver Disease	C06;C25	0.31	2015	0.299
phenotype	0.15499		Digestive System Diseases; Chemically-Induced Disorders	1	Enzyme	SOD2	CURATED	6648	DTO_05007624	2014	0.923	C0860207	P04179	Disease or Syndrome	Drug-Induced Liver Disease	C06;C25	0.31	2010	0.379
phenotype	5.3634e-08		Digestive System Diseases; Chemically-Induced Disorders	1		UGT1A9	CURATED	54600		2015	0.577	C0860207	O60656	Disease or Syndrome	Drug-Induced Liver Disease	C06;C25	0.31	2011	0.59
phenotype	0.0011573		Digestive System Diseases; Chemically-Induced Disorders	1		GOT1	CURATED	2805		2014	0.692	C0860207	P17174	Disease or Syndrome	Drug-Induced Liver Disease	C06;C25	0.3	2014	0.601
phenotype	0.010345		Digestive System Diseases; Chemically-Induced Disorders	1	Enzyme	PLG	CURATED	5340	DTO_05007624	2012	0.923	C0860207	P00747	Disease or Syndrome	Drug-Induced Liver Disease	C06;C25	0.3	2012	0.389
phenotype	0.00093892		Digestive System Diseases; Chemically-Induced Disorders	1	Nuclear receptor	NR1H4	CURATED	9971	DTO_00102000	2003	0.808	C0860207	Q96RI1	Disease or Syndrome	Drug-Induced Liver Disease	C06;C25	0.3	2003	0.513
phenotype	0.90374		Digestive System Diseases; Chemically-Induced Disorders	1	Nuclear receptor	NR1H3	CURATED	10062	DTO_00102000	2007	0.692	C0860207	Q13133	Disease or Syndrome	Drug-Induced Liver Disease	C06;C25	0.3	2007	0.566
disease	0.64329		Skin and Connective Tissue Diseases; Immune System Diseases; Chemically-Induced Disorders; Stomatognathic Diseases	1	Transporter	ALB	CURATED	213	DTO_05007405	2002	0.962	C1274933	P02768	Disease or Syndrome	Drug-Induced Stevens Johnson Syndrome	C17;C20;C25;C07	0.3	2002	0.317
disease	5.4379e-11		Congenital, Hereditary, and Neonatal Diseases and Abnormalities; Musculoskeletal Diseases; Endocrine System Diseases	1	Receptor	IGFALS	CURATED	3483	DTO_05007575	2020	0.846	C0013336	P35858	Congenital Abnormality	Dwarfism	C16;C05;C19	0.35	2004	0.511
group	1.0376e-19		Congenital, Hereditary, and Neonatal Diseases and Abnormalities; Musculoskeletal Diseases	1	Enzyme modulator	HSPG2	CURATED	3339	DTO_05007584	2001	0.885	C0013366	P98160	Congenital Abnormality	Dyschondroplasias	C16;C05	0.3	1999	0.438
group	0.0018685		Nutritional and Metabolic Diseases	0.985		APOE	CURATED	348		2020	0.962	C0242339	P02649	Disease or Syndrome	Dyslipidemias	C18	0.4	1994	0.338
group	1.1892e-23		Nutritional and Metabolic Diseases	1		CETP	CURATED	1071		2019	0.731	C0242339	P11597	Disease or Syndrome	Dyslipidemias	C18	0.4	1996	0.512
group	9.841e-24		Nutritional and Metabolic Diseases	0.917		LDLR	CURATED	3949		2019	0.885	C0242339	P01130	Disease or Syndrome	Dyslipidemias	C18	0.4	1996	0.449
group	1.2712e-09		Nutritional and Metabolic Diseases	0.976	Enzyme	LPL	CURATED	4023	DTO_05007624	2019	0.808	C0242339	P06858	Disease or Syndrome	Dyslipidemias	C18	0.4	1995	0.474
group	1.9234e-16		Nutritional and Metabolic Diseases	1		APOB	CURATED	338		2019	0.808	C0242339	P04114	Disease or Syndrome	Dyslipidemias	C18	0.4	1994	0.453
group	0.030182		Nutritional and Metabolic Diseases	0.975	Nuclear receptor	PPARA	CURATED	5465	DTO_00102000	2019	0.885	C0242339	Q07869	Disease or Syndrome	Dyslipidemias	C18	0.4	2000	0.432
group	0.96926		Nutritional and Metabolic Diseases	1		NECTIN2	CURATED	5819		2018	0.769	C0242339	Q92692	Disease or Syndrome	Dyslipidemias	C18	0.31	2018	0.575
group	3.081e-21		Nutritional and Metabolic Diseases	1	Transporter	ABCG5	CURATED	64240	DTO_05007405	2009	0.577	C0242339	Q9H222	Disease or Syndrome	Dyslipidemias	C18	0.3	2009	0.592
phenotype	1.9234e-16		Nutritional and Metabolic Diseases	1		APOB	CURATED	338		2008	0.808	C0598784	P04114	Pathologic Function	Dyslipoproteinemias	C18	0.3	2008	0.453
phenotype	0.030182		Nutritional and Metabolic Diseases	1	Nuclear receptor	PPARA	CURATED	5465	DTO_00102000	2005	0.885	C0598784	Q07869	Pathologic Function	Dyslipoproteinemias	C18	0.3	2005	0.432
phenotype	0.0018685		Nutritional and Metabolic Diseases	1		APOE	CURATED	348		2014	0.962	C0598784	P02649	Pathologic Function	Dyslipoproteinemias	C18	0.3	2014	0.338
phenotype	1.1892e-23		Nutritional and Metabolic Diseases	1		CETP	CURATED	1071		2007	0.731	C0598784	P11597	Pathologic Function	Dyslipoproteinemias	C18	0.3	2007	0.512
phenotype	9.841e-24		Nutritional and Metabolic Diseases	1		LDLR	CURATED	3949		2010	0.885	C0598784	P01130	Pathologic Function	Dyslipoproteinemias	C18	0.3	2010	0.449
phenotype	1.2712e-09		Nutritional and Metabolic Diseases	1	Enzyme	LPL	CURATED	4023	DTO_05007624	2007	0.808	C0598784	P06858	Pathologic Function	Dyslipoproteinemias	C18	0.3	2007	0.474
phenotype	0.96926		Nutritional and Metabolic Diseases	1		NECTIN2	CURATED	5819		2018	0.769	C0598784	Q92692	Pathologic Function	Dyslipoproteinemias	C18	0.3	2018	0.575
phenotype	3.081e-21		Nutritional and Metabolic Diseases	1	Transporter	ABCG5	CURATED	64240	DTO_05007405	2009	0.577	C0598784	Q9H222	Pathologic Function	Dyslipoproteinemias	C18	0.3	2009	0.592
group	3.0504e-07		Nervous System Diseases	1	Enzyme	ALDH5A1	CURATED	7915	DTO_05007624	2007	0.462	C0393593	P51649	Disease or Syndrome	Dystonia Disorders	C10	0.3	2007	0.619
disease	3.0504e-07		Nervous System Diseases	1	Enzyme	ALDH5A1	CURATED	7915	DTO_05007624	2007	0.462	C0752203	P51649	Disease or Syndrome	Dystonia, Primary	C10	0.3	2007	0.619
disease	3.0504e-07		Nervous System Diseases	1	Enzyme	ALDH5A1	CURATED	7915	DTO_05007624	2007	0.462	C0752205	P51649	Disease or Syndrome	Dystonia, Secondary	C10	0.3	2007	0.619
disease	3.0504e-07		Nervous System Diseases	1	Enzyme	ALDH5A1	CURATED	7915	DTO_05007624	2007	0.462	C0752206	P51649	Disease or Syndrome	Dystonias, Sporadic	C10	0.3	2007	0.619
phenotype	0.0018685		Female Urogenital Diseases and Pregnancy Complications	1		APOE	CURATED	348		2012	0.962	C3830362	P02649	Finding	Early Pregnancy Loss	C13	0.3	2012	0.338
phenotype	0.91029		Female Urogenital Diseases and Pregnancy Complications	1	Enzyme modulator	IGFBP3	CURATED	3486	DTO_05007584	2008	0.808	C3830362	P17936	Finding	Early Pregnancy Loss	C13	0.3	2008	0.439
phenotype	0.65372		Female Urogenital Diseases and Pregnancy Complications	1	Kinase	JAK2	CURATED	3717	DTO_03300101	2007	0.885	C3830362	O60674	Finding	Early Pregnancy Loss	C13	0.3	2007	0.385
disease	0.64329		Infections	1	Transporter	ALB	CURATED	213	DTO_05007405	2014	0.962	C0013502	P02768	Disease or Syndrome	Echinococcosis	C01	0.3	2014	0.317
disease	0.030182		Congenital, Hereditary, and Neonatal Diseases and Abnormalities; Skin and Connective Tissue Diseases; Immune System Diseases	1	Nuclear receptor	PPARA	CURATED	5465	DTO_00102000	2008	0.885	C0086196	Q07869	Disease or Syndrome	Eczema, Infantile	C16;C17;C20	0.3	2008	0.432
phenotype	0.00054909		Pathological Conditions, Signs and Symptoms	1		APOA1	CURATED	335		2011	0.885	C0013604	P02647	Pathologic Function	Edema	C23	0.4	2011	0.429
disease	0.15499		Nutritional and Metabolic Diseases	1	Enzyme	SOD2	CURATED	6648	DTO_05007624	1999	0.923	C0949855	P04179	Disease or Syndrome	Electron Transport Chain Deficiencies, Mitochondrial	C18	0.3	1999	0.379
phenotype	1	strong		1		SPTB	CURATED	6710		2016	0.462	C0427480	P11277	Finding	Elliptocytosis found		0.4	1993	0.65
phenotype	0.15499		Pathological Conditions, Signs and Symptoms; Nervous System Diseases; Cardiovascular Diseases	1	Enzyme	SOD2	CURATED	6648	DTO_05007624	2011	0.923	C0751847	P04179	Disease or Syndrome	Embolic Infarction, Middle Cerebral Artery	C23;C10;C14	0.3	2011	0.379
disease	7.8157e-09		Nervous System Diseases; Chemically-Induced Disorders	1	Immune response	CRISPLD2	CURATED	83716	DTO_05007608	2010	0.769	C0149504	Q9H0B8	Injury or Poisoning	Encephalopathy, Toxic	C10;C25	0.3	2010	0.585
disease	0.64329		Mental Disorders	1	Transporter	ALB	CURATED	213	DTO_05007405	1996	0.962	C0011573	P02768	Mental or Behavioral Dysfunction	Endogenous depression	F03	0.3	1996	0.317
disease	0.0184		Mental Disorders	1	Signaling	FGF2	CURATED	2247	DTO_05007599	2006	0.923	C0011573	P09038	Mental or Behavioral Dysfunction	Endogenous depression	F03	0.3	2006	0.383
disease	0.00091697		Nutritional and Metabolic Diseases	1	G-protein coupled receptor	MC4R	CURATED	4160	DTO_02300001	2012	0.692	C1257963	P32245	Disease or Syndrome	Endogenous Hyperinsulinism	C18	0.3	2012	0.535
disease	1		Neoplasms; Female Urogenital Diseases and Pregnancy Complications	1	Kinase	MAP3K4	CURATED	4216	DTO_03300101	2012	0.462	C0476089	Q9Y6R4	Neoplastic Process	Endometrial Carcinoma	C04;C13	0.3	2012	0.729
group	1		Neoplasms; Female Urogenital Diseases and Pregnancy Complications	1	Kinase	MAP3K4	CURATED	4216	DTO_03300101	2012	0.462	C0014170	Q9Y6R4	Neoplastic Process	Endometrial Neoplasms	C04;C13	0.3	2012	0.729
disease	4.9944e-08		Female Urogenital Diseases and Pregnancy Complications	1	Enzyme	ENPP1	CURATED	5167	DTO_05007624	2018	0.808	C0269102	P22413	Neoplastic Process	Endometrioma	C13	0.31	2011	0.498
disease	0.31397		Female Urogenital Diseases and Pregnancy Complications	1		IHH	CURATED	3549		2011	0.538	C0269102	Q14623	Neoplastic Process	Endometrioma	C13	0.3	2011	0.573
disease	0.26588		Female Urogenital Diseases and Pregnancy Complications	1	Signaling	STC2	CURATED	8614	DTO_05007599	2011	0.692	C0269102	O76061	Neoplastic Process	Endometrioma	C13	0.3	2011	0.573
disease	4.9944e-08		Female Urogenital Diseases and Pregnancy Complications	1	Enzyme	ENPP1	CURATED	5167	DTO_05007624	2018	0.808	C0014175	P22413	Disease or Syndrome	Endometriosis	C13	0.31	2011	0.498
disease	0.31397		Female Urogenital Diseases and Pregnancy Complications	1		IHH	CURATED	3549		2011	0.538	C0014175	Q14623	Disease or Syndrome	Endometriosis	C13	0.3	2011	0.573
disease	0.26588		Female Urogenital Diseases and Pregnancy Complications	1	Signaling	STC2	CURATED	8614	DTO_05007599	2011	0.692	C0014175	O76061	Disease or Syndrome	Endometriosis	C13	0.3	2011	0.573
phenotype	1		Cardiovascular Diseases	1	Receptor	IGF2R	CURATED	3482	DTO_05007575	2019	0.731	C0553980	P11717	Pathologic Function	Endomyocardial Fibrosis	C14	0.3	2019	0.518
phenotype	0.15499		Pathological Conditions, Signs and Symptoms; Infections	1	Enzyme	SOD2	CURATED	6648	DTO_05007624	2006	0.923	C0376618	P04179	Disease or Syndrome	Endotoxemia	C23;C01	0.3	2006	0.379
phenotype	1.1401e-14	strong		1	Ion channel	TMC8	CURATED	147138	DTO_01300327	2017	0.231	C4722564	Q8IU68	Finding	EPIDERMODYSPLASIA VERRUCIFORMIS, SUSCEPTIBILITY TO, 1		0.3	2017	0.705
phenotype	1.1401e-14	strong		1	Ion channel	TMC8	CURATED	147138	DTO_01300327	2019	0.231	C4722258	Q8IU68	Finding	EPIDERMODYSPLASIA VERRUCIFORMIS, SUSCEPTIBILITY TO, 2		0.4	2002	0.705
disease	1.6432e-05	moderate	Nervous System Diseases	1	Kinase	FGFR3	CURATED	2261	DTO_03300101	2014	0.846	C0014547	P22607	Disease or Syndrome	Epilepsies, Partial	C10	0.31	2007	0.391
disease	1.6432e-05	moderate	Nervous System Diseases	1	Kinase	FGFR3	CURATED	2261	DTO_03300101	2017	0.846	C0014544	P22607	Disease or Syndrome	Epilepsy	C10	0.32	2007	0.391
disease	1		Nervous System Diseases	1		ARID1B	CURATED	57492		2018	0.846	C0014544	Q8NFD5	Disease or Syndrome	Epilepsy	C10	0.3	2018	0.503
disease	0.64329		Nervous System Diseases	1	Transporter	ALB	CURATED	213	DTO_05007405	2007	0.962	C0086237	P02768	Disease or Syndrome	Epilepsy, Cryptogenic	C10	0.3	2004	0.317
disease	1		Nervous System Diseases	1		ARID1B	CURATED	57492		2018	0.846	C0086237	Q8NFD5	Disease or Syndrome	Epilepsy, Cryptogenic	C10	0.3	2018	0.503
disease	0.046698			1	G-protein coupled receptor	CASR	CURATED	846	DTO_02300001	2008	0.846	C2752062	P41180	Finding	EPILEPSY, IDIOPATHIC GENERALIZED, SUSCEPTIBILITY TO, 8		0.3	2008	0.41
disease	0.0184		Nervous System Diseases	1	Signaling	FGF2	CURATED	2247	DTO_05007599	2005	0.923	C0751118	P09038	Disease or Syndrome	Epilepsy, Tonic-Clonic, Familial	C10	0.3	2005	0.383
disease	0.0184		Nervous System Diseases	1	Signaling	FGF2	CURATED	2247	DTO_05007599	2005	0.923	C0751119	P09038	Disease or Syndrome	Epilepsy, Tonic-Clonic, Symptomatic	C10	0.3	2005	0.383
disease	0.0003636		Pathological Conditions, Signs and Symptoms; Nervous System Diseases	1	Enzyme	ALPL	CURATED	249	DTO_05007624	2016	0.769	C0270846	P05186	Disease or Syndrome	Epileptic drop attack	C23;C10	0.3	1995	0.546
disease	0.0018685		Pathological Conditions, Signs and Symptoms; Nervous System Diseases	1		APOE	CURATED	348		2013	0.962	C0270846	P02649	Disease or Syndrome	Epileptic drop attack	C23;C10	0.3	2013	0.338
disease	0.0184		Pathological Conditions, Signs and Symptoms; Nervous System Diseases	1	Signaling	FGF2	CURATED	2247	DTO_05007599	2011	0.923	C0270846	P09038	Disease or Syndrome	Epileptic drop attack	C23;C10	0.3	2011	0.383
disease	0.15499		Pathological Conditions, Signs and Symptoms; Nervous System Diseases	1	Enzyme	SOD2	CURATED	6648	DTO_05007624	2010	0.923	C0270846	P04179	Disease or Syndrome	Epileptic drop attack	C23;C10	0.3	2010	0.379
phenotype	0.0003636		Pathological Conditions, Signs and Symptoms; Nervous System Diseases	1	Enzyme	ALPL	CURATED	249	DTO_05007624	2016	0.769	C4317109	P05186	Disease or Syndrome	Epileptic Seizures	C23;C10	0.31	1995	0.546
phenotype	0.0018685		Pathological Conditions, Signs and Symptoms; Nervous System Diseases	1		APOE	CURATED	348		2013	0.962	C4317109	P02649	Disease or Syndrome	Epileptic Seizures	C23;C10	0.3	2013	0.338
phenotype	0.0184		Pathological Conditions, Signs and Symptoms; Nervous System Diseases	1	Signaling	FGF2	CURATED	2247	DTO_05007599	2011	0.923	C4317109	P09038	Disease or Syndrome	Epileptic Seizures	C23;C10	0.3	2011	0.383
phenotype	0.15499		Pathological Conditions, Signs and Symptoms; Nervous System Diseases	1	Enzyme	SOD2	CURATED	6648	DTO_05007624	2010	0.923	C4317109	P04179	Disease or Syndrome	Epileptic Seizures	C23;C10	0.3	2010	0.379
disease	1.2538e-06		Male Urogenital Diseases; Mental Disorders	1		SHBG	CURATED	6462		2019	0.808	C0242350	P04278	Disease or Syndrome	Erectile dysfunction	C12;F03	0.33	2008	0.438
phenotype	0.030057		Hemic and Lymphatic Diseases	1	Signaling	GH1	CURATED	2688	DTO_05007599	2004	0.923	C1527405	P01241	Finding	Erythrocytosis	C15	0.3	2004	0.373
phenotype	0.65372		Hemic and Lymphatic Diseases	1	Kinase	JAK2	CURATED	3717	DTO_03300101	2007	0.885	C1527405	O60674	Finding	Erythrocytosis	C15	0.3	2007	0.385
disease	0.00010289		Hemic and Lymphatic Diseases	NA		SH2B3	CURATED	10019		NA	0.692	C4551637	Q9UQQ2	Disease or Syndrome	Erythrocytosis familial, 1	C15	0.4	NA	0.527
group	0.15499		Digestive System Diseases; Neoplasms	1	Enzyme	SOD2	CURATED	6648	DTO_05007624	2011	0.923	C0014859	P04179	Neoplastic Process	Esophageal Neoplasms	C06;C04	0.32	2000	0.379
group	7.2668e-09		Digestive System Diseases; Neoplasms	1	Nuclear receptor	NR1I2	CURATED	8856	DTO_00102000	2016	0.846	C0014859	O75469	Neoplastic Process	Esophageal Neoplasms	C06;C04	0.31	2011	0.418
disease	0.15499		Digestive System Diseases	1	Enzyme	SOD2	CURATED	6648	DTO_05007624	2001	0.923	C0014866	P04179	Disease or Syndrome	Esophageal Stenosis	C06	0.3	2001	0.379
disease	0.15499		Digestive System Diseases	1	Enzyme	SOD2	CURATED	6648	DTO_05007624	2001	0.923	C4551650	P04179	Disease or Syndrome	Esophageal Stricture	C06	0.31	2001	0.379
disease	0.15499		Digestive System Diseases	1	Enzyme	SOD2	CURATED	6648	DTO_05007624	2001	0.923	C0014868	P04179	Disease or Syndrome	Esophagitis	C06	0.31	2001	0.379
disease	0.00091697		Nutritional and Metabolic Diseases	1	G-protein coupled receptor	MC4R	CURATED	4160	DTO_02300001	2012	0.692	C1257964	P32245	Disease or Syndrome	Exogenous Hyperinsulinism	C18	0.3	2012	0.535
disease	0.030182		Immune System Diseases; Nervous System Diseases	1	Nuclear receptor	PPARA	CURATED	5465	DTO_00102000	2007	0.885	C0014072	Q07869	Experimental Model of Disease	Experimental Autoimmune Encephalomyelitis	C20;C10	0.3	2007	0.432
disease	0.65372		Digestive System Diseases; Neoplasms	1	Kinase	JAK2	CURATED	3717	DTO_03300101	2017	0.885	C0086404	O60674	Neoplastic Process; Experimental Model of Disease	Experimental Hepatoma	C06;C04	0.3	2017	0.385
group	0.0018685		Nervous System Diseases; Cardiovascular Diseases	1		APOE	CURATED	348		2008	0.962	C0600178	P02649	Disease or Syndrome	External Carotid Artery Diseases	C10;C14	0.3	2008	0.338
disease	0.0018685		Nervous System Diseases; Cardiovascular Diseases	1		APOE	CURATED	348		2006	0.962	C0751636	P02649	Disease or Syndrome	External Carotid Artery Stenosis	C10;C14	0.3	2006	0.338
phenotype	0.00093892		Pathological Conditions, Signs and Symptoms; Wounds and Injuries	1	Nuclear receptor	NR1H4	CURATED	9971	DTO_00102000	2012	0.808	C0015378	Q96RI1	Pathologic Function	Extravasation of Contrast Media	C23;C26	0.3	2012	0.513
group	0.15499		Respiratory Tract Diseases; Immune System Diseases	1	Enzyme	SOD2	CURATED	6648	DTO_05007624	2000	0.923	C0002390	P04179	Disease or Syndrome	Extrinsic allergic alveolitis	C08;C20	0.3	2000	0.379
group	0.99999		Congenital, Hereditary, and Neonatal Diseases and Abnormalities; Eye Diseases	1		LRP2	CURATED	4036		2007	0.846	C0015398	P98164	Disease or Syndrome	Eye Diseases, Hereditary	C16;C11	0.3	2007	0.491
disease	0.0018685		Nervous System Diseases; Mental Disorders	0.978		APOE	CURATED	348		2018	0.962	C0276496	P02649	Disease or Syndrome	Familial Alzheimer Disease (FAD)	C10;F03	0.4	1993	0.338
disease	0.0039011		Nervous System Diseases; Mental Disorders	1		CST3	CURATED	1471		2007	0.808	C0276496	P01034	Disease or Syndrome	Familial Alzheimer Disease (FAD)	C10;F03	0.3	2007	0.436
disease	1		Nervous System Diseases; Mental Disorders	1	Receptor	IGF2R	CURATED	3482	DTO_05007575	2005	0.731	C0276496	P11717	Disease or Syndrome	Familial Alzheimer Disease (FAD)	C10;F03	0.3	2005	0.518
disease	1.9234e-16	strong	Nutritional and Metabolic Diseases	0.985		APOB	CURATED	338		2019	0.808	C0020443	P04114	Disease or Syndrome	Hypercholesterolemia	C18	0.9	1987	0.453
disease	1.9234e-16	strong	Congenital, Hereditary, and Neonatal Diseases and Abnormalities; Nutritional and Metabolic Diseases	0.986		APOB	CURATED	338		2019	0.808	C0020445	P04114	Disease or Syndrome	Hypercholesterolemia, Familial	C16;C18	0.7	1979	0.453
disease	0.96926		Nervous System Diseases; Mental Disorders	1		NECTIN2	CURATED	5819		2018	0.769	C0276496	Q92692	Disease or Syndrome	Familial Alzheimer Disease (FAD)	C10;F03	0.3	2018	0.575
disease	1.9234e-16		Nutritional and Metabolic Diseases	1		APOB	CURATED	338		2020	0.808	C0020473	P04114	Disease or Syndrome	Hyperlipidemia	C18	0.5	1976	0.453
disease	0.15499		Nervous System Diseases; Mental Disorders	1	Enzyme	SOD2	CURATED	6648	DTO_05007624	2009	0.923	C0276496	P04179	Disease or Syndrome	Familial Alzheimer Disease (FAD)	C10;F03	0.3	2009	0.379
disease	0.17259		Nervous System Diseases; Mental Disorders	1		TFAM	CURATED	7019		2007	0.731	C0276496	Q00059	Disease or Syndrome	Familial Alzheimer Disease (FAD)	C10;F03	0.3	2007	0.529
phenotype	1.0376e-19		Pathological Conditions, Signs and Symptoms; Cardiovascular Diseases	1	Enzyme modulator	HSPG2	CURATED	3339	DTO_05007584	2018	0.885	C3468561	P98160	Pathologic Function	familial atrial fibrillation	C23;C14	0.3	2018	0.438
phenotype	0.99892		Pathological Conditions, Signs and Symptoms; Cardiovascular Diseases	1	Cellular structure	WDR1	CURATED	9948	DTO_05007530	2018	0.654	C3468561	O75083	Pathologic Function	familial atrial fibrillation	C23;C14	0.3	2018	0.623
phenotype	8.6107e-06		Pathological Conditions, Signs and Symptoms; Cardiovascular Diseases	1	Nucleic acid binding	SCMH1	CURATED	22955	DTO_05007557	2018	0.077	C3468561	Q96GD3	Pathologic Function	familial atrial fibrillation	C23;C14	0.3	2018	0.931
disease	0.0039011		Congenital, Hereditary, and Neonatal Diseases and Abnormalities; Nutritional and Metabolic Diseases; Nervous System Diseases; Cardiovascular Diseases	1		CST3	CURATED	1471		2013	0.808	C0268393	P01034	Disease or Syndrome	Familial Cerebral Amyloid Angiopathy	C16;C18;C10;C14	0.31	2008	0.436
disease	3.0504e-07		Nervous System Diseases	1	Enzyme	ALDH5A1	CURATED	7915	DTO_05007624	2007	0.462	C0752207	P51649	Disease or Syndrome	Familial Dystonia	C10	0.3	2007	0.619
disease	1.4525e-13		Congenital, Hereditary, and Neonatal Diseases and Abnormalities; Nutritional and Metabolic Diseases	1	Transporter	ABCA1	CURATED	19	DTO_05007405	2017	0.846	C2931838	O95477	Disease or Syndrome	Familial HDL deficiency	C16;C18	0.4	1999	0.467
disease	3.081e-21		Congenital, Hereditary, and Neonatal Diseases and Abnormalities; Nutritional and Metabolic Diseases	1	Transporter	ABCG5	CURATED	64240	DTO_05007405	2010	0.577	C0342881	Q9H222	Disease or Syndrome	Familial hypercholesterolemia - homozygous	C16;C18	0.3	2010	0.592
disease	0.15499		Congenital, Hereditary, and Neonatal Diseases and Abnormalities; Digestive System Diseases; Neoplasms	1	Enzyme	SOD2	CURATED	6648	DTO_05007624	2003	0.923	C2713443	P04179	Disease or Syndrome	Familial Intestinal Polyposis	C16;C06;C04	0.3	2003	0.379
disease	0.046698	strong	Endocrine System Diseases	1	G-protein coupled receptor	CASR	CURATED	846	DTO_02300001	2019	0.846	C4551961	P41180	Disease or Syndrome	Familial Isolated Hyperparathyroidism	C19	0.35	2004	0.41
disease	0.00054909	limited		1		APOA1	CURATED	335		1999	0.885	C4087498	P02647	Disease or Syndrome	Familial LCAT deficiency		0.3	1999	0.429
disease	0.65372		Hemic and Lymphatic Diseases	1	Kinase	JAK2	CURATED	3717	DTO_03300101	2012	0.885	C4303761	O60674	Disease or Syndrome	Familial thrombocytosis	C15	0.31	2009	0.385
disease	0.15499		Congenital, Hereditary, and Neonatal Diseases and Abnormalities; Nutritional and Metabolic Diseases; Nervous System Diseases	1	Enzyme	SOD2	CURATED	6648	DTO_05007624	1999	0.923	C0268255	P04179	Disease or Syndrome	Farber Lipogranulomatosis	C16;C18;C10	0.31	1999	0.379
phenotype	0.63464	strong		NA	Kinase	GCK	CURATED	2645	DTO_03300101	NA	0.808	C2609269	P35557	Finding	Fasting hyperglycaemia		0.3	NA	0.523
phenotype	0.030182		Nutritional and Metabolic Diseases	1	Nuclear receptor	PPARA	CURATED	5465	DTO_00102000	2006	0.885	C0271708	Q07869	Disease or Syndrome	Fasting Hypoglycemia	C18	0.3	2006	0.432
phenotype	0.15499		Nutritional and Metabolic Diseases	1	Enzyme	SOD2	CURATED	6648	DTO_05007624	2010	0.923	C0271708	P04179	Disease or Syndrome	Fasting Hypoglycemia	C18	0.3	2010	0.379
disease	3.5945e-19		Digestive System Diseases	0.943	Enzyme	GPT	CURATED	2875	DTO_05007624	2020	0.923	C0015695	P24298	Disease or Syndrome	Fatty Liver	C06	0.4	2000	0.403
disease	0.90374		Digestive System Diseases	1	Nuclear receptor	NR1H3	CURATED	10062	DTO_00102000	2015	0.692	C0015695	Q13133	Disease or Syndrome	Fatty Liver	C06	0.35	2010	0.566
disease	7.2668e-09		Digestive System Diseases	1	Nuclear receptor	NR1I2	CURATED	8856	DTO_00102000	2019	0.846	C0015695	O75469	Disease or Syndrome	Fatty Liver	C06	0.33	2012	0.418
disease	0.00093892		Digestive System Diseases	1	Nuclear receptor	NR1H4	CURATED	9971	DTO_00102000	2018	0.808	C0015695	Q96RI1	Disease or Syndrome	Fatty Liver	C06	0.33	2008	0.513
disease	0.15499		Digestive System Diseases	1	Enzyme	SOD2	CURATED	6648	DTO_05007624	2000	0.923	C0015695	P04179	Disease or Syndrome	Fatty Liver	C06	0.3	2000	0.379
phenotype	7.2668e-09		Female Urogenital Diseases and Pregnancy Complications	1	Nuclear receptor	NR1I2	CURATED	8856	DTO_00102000	2013	0.846	C0021361	O75469	Pathologic Function	Female infertility	C13	0.3	2013	0.418
phenotype	7.2668e-09		Female Urogenital Diseases and Pregnancy Complications	1	Nuclear receptor	NR1I2	CURATED	8856	DTO_00102000	2013	0.846	C0917730	O75469	Finding	Female sterility	C13	0.3	2013	0.418
phenotype	0.15499		Pathological Conditions, Signs and Symptoms	1	Enzyme	SOD2	CURATED	6648	DTO_05007624	2001	0.923	C0015967	P04179	Sign or Symptom	Fever	C23	0.32	1997	0.379
disease	0.0018685		Pathological Conditions, Signs and Symptoms	1		APOE	CURATED	348		2018	0.962	C2936351	P02649	Acquired Abnormality	Fibroatheroma	C23	0.3	2007	0.338
disease	7.2668e-09		Pathological Conditions, Signs and Symptoms	1	Nuclear receptor	NR1I2	CURATED	8856	DTO_00102000	2018	0.846	C2936351	O75469	Acquired Abnormality	Fibroatheroma	C23	0.3	2018	0.418
disease	0.00093892		Pathological Conditions, Signs and Symptoms	1	Nuclear receptor	NR1H4	CURATED	9971	DTO_00102000	2019	0.808	C2936351	Q96RI1	Acquired Abnormality	Fibroatheroma	C23	0.3	2019	0.513
phenotype	0.64329		Pathological Conditions, Signs and Symptoms	1	Transporter	ALB	CURATED	213	DTO_05007405	2014	0.962	C0016059	P02768	Pathologic Function	Fibrosis	C23	0.3	2014	0.317
phenotype	0.15499		Pathological Conditions, Signs and Symptoms	1	Enzyme	SOD2	CURATED	6648	DTO_05007624	2009	0.923	C0016059	P04179	Pathologic Function	Fibrosis	C23	0.3	2009	0.379
disease	0.64329		Pathological Conditions, Signs and Symptoms; Digestive System Diseases	0.9	Transporter	ALB	CURATED	213	DTO_05007405	2020	0.962	C0239946	P02768	Disease or Syndrome	Fibrosis, Liver	C23;C06	0.4	1987	0.317
disease	0.0184		Pathological Conditions, Signs and Symptoms; Digestive System Diseases	1	Signaling	FGF2	CURATED	2247	DTO_05007599	2017	0.923	C0239946	P09038	Disease or Syndrome	Fibrosis, Liver	C23;C06	0.32	2007	0.383
disease	3.793e-10		Pathological Conditions, Signs and Symptoms; Digestive System Diseases	1		CYP2R1	CURATED	120227		2014	0.731	C0239946	Q6VVX0	Disease or Syndrome	Fibrosis, Liver	C23;C06	0.31	2013	0.563
disease	0.0039011		Neoplasms; Nervous System Diseases	1		CST3	CURATED	1471		2010	0.808	C0334606	P01034	Neoplastic Process	Fibrous Meningioma	C04;C10	0.3	2010	0.436
disease	3.0504e-07		Nervous System Diseases	1	Enzyme	ALDH5A1	CURATED	7915	DTO_05007624	2007	0.462	C0743332	P51649	Disease or Syndrome	Focal Dystonia	C10	0.3	2007	0.619
phenotype	3.0504e-07		Pathological Conditions, Signs and Symptoms; Nervous System Diseases	1	Enzyme	ALDH5A1	CURATED	7915	DTO_05007624	2018	0.462	C0746857	P51649	Finding	Focal Neurologic Deficits	C23;C10	0.3	2018	0.619
disease	0.066228		Neoplasms	1	Receptor	SCARB1	CURATED	949	DTO_05007575	2010	0.731	C0016427	Q8WTV0	Acquired Abnormality	Follicular cyst	C04	0.3	2010	0.559
disease	0.31397		Digestive System Diseases; Neoplasms	1		IHH	CURATED	3549		2016	0.538	C3179349	Q14623	Neoplastic Process	Gastrointestinal Stromal Sarcoma	C06;C04	0.3	2016	0.573
group	0.31397		Digestive System Diseases; Neoplasms	1		IHH	CURATED	3549		2016	0.538	C0238198	Q14623	Neoplastic Process	Gastrointestinal Stromal Tumors	C06;C04	0.3	2016	0.573
phenotype	0.0003636		Pathological Conditions, Signs and Symptoms; Nervous System Diseases	1	Enzyme	ALPL	CURATED	249	DTO_05007624	2016	0.769	C4505436	P05186	Disease or Syndrome	Generalized Absence Seizures	C23;C10	0.3	1995	0.546
phenotype	0.0018685		Pathological Conditions, Signs and Symptoms; Nervous System Diseases	1		APOE	CURATED	348		2013	0.962	C4505436	P02649	Disease or Syndrome	Generalized Absence Seizures	C23;C10	0.3	2013	0.338
phenotype	0.0184		Pathological Conditions, Signs and Symptoms; Nervous System Diseases	1	Signaling	FGF2	CURATED	2247	DTO_05007599	2011	0.923	C4505436	P09038	Disease or Syndrome	Generalized Absence Seizures	C23;C10	0.3	2011	0.383
phenotype	0.15499		Pathological Conditions, Signs and Symptoms; Nervous System Diseases	1	Enzyme	SOD2	CURATED	6648	DTO_05007624	2010	0.923	C4505436	P04179	Disease or Syndrome	Generalized Absence Seizures	C23;C10	0.3	2010	0.379
disease	0.0003636		Pathological Conditions, Signs and Symptoms; Nervous System Diseases	1	Enzyme	ALPL	CURATED	249	DTO_05007624	2016	0.769	C0234533	P05186	Disease or Syndrome	Generalized seizures	C23;C10	0.3	1995	0.546
disease	0.0018685		Pathological Conditions, Signs and Symptoms; Nervous System Diseases	1		APOE	CURATED	348		2013	0.962	C0234533	P02649	Disease or Syndrome	Generalized seizures	C23;C10	0.3	2013	0.338
disease	0.0184		Pathological Conditions, Signs and Symptoms; Nervous System Diseases	1	Signaling	FGF2	CURATED	2247	DTO_05007599	2011	0.923	C0234533	P09038	Disease or Syndrome	Generalized seizures	C23;C10	0.3	2011	0.383
disease	0.15499		Pathological Conditions, Signs and Symptoms; Nervous System Diseases	1	Enzyme	SOD2	CURATED	6648	DTO_05007624	2010	0.923	C0234533	P04179	Disease or Syndrome	Generalized seizures	C23;C10	0.3	2010	0.379
phenotype	0.0184		Nutritional and Metabolic Diseases; Female Urogenital Diseases and Pregnancy Complications; Endocrine System Diseases	1	Signaling	FGF2	CURATED	2247	DTO_05007599	2016	0.923	C0085207	P09038	Disease or Syndrome	Gestational Diabetes	C18;C13;C19	0.32	2010	0.383
phenotype	0.15499		Nutritional and Metabolic Diseases; Female Urogenital Diseases and Pregnancy Complications; Endocrine System Diseases	1	Enzyme	SOD2	CURATED	6648	DTO_05007624	2019	0.923	C0085207	P04179	Disease or Syndrome	Gestational Diabetes	C18;C13;C19	0.32	2013	0.379
disease	1.6432e-05		Neoplasms	1	Kinase	FGFR3	CURATED	2261	DTO_03300101	2012	0.846	C0334588	P22607	Neoplastic Process	Giant Cell Glioblastoma	C04	0.3	2012	0.391
disease	0.0184		Neoplasms	1	Signaling	FGF2	CURATED	2247	DTO_05007599	2019	0.923	C0017638	P09038	Neoplastic Process	Glioma	C04	0.4	1993	0.383
disease	1.6432e-05		Neoplasms	1	Kinase	FGFR3	CURATED	2261	DTO_03300101	2012	0.846	C0206726	P22607	Neoplastic Process	gliosarcoma	C04	0.3	2012	0.391
disease	3.4212e-10		Neoplasms	1		POR	CURATED	5447		1998	0.769	C0206726	P16435	Neoplastic Process	gliosarcoma	C04	0.3	1998	0.502
phenotype	0.0184		Pathological Conditions, Signs and Symptoms	1	Signaling	FGF2	CURATED	2247	DTO_05007599	2010	0.923	C0017639	P09038	Pathologic Function	Gliosis	C23	0.3	2010	0.383
phenotype	0.96926		Male Urogenital Diseases	1		NECTIN2	CURATED	5819		2017	0.769	C0403825	Q92692	Finding	Globozoospermia	C12	0.3	2017	0.575
disease	0.64329		Female Urogenital Diseases and Pregnancy Complications; Male Urogenital Diseases	1	Transporter	ALB	CURATED	213	DTO_05007405	2020	0.962	C0017658	P02768	Disease or Syndrome	Glomerulonephritis	C13;C12	0.39	1980	0.317
disease	0.64329		Female Urogenital Diseases and Pregnancy Complications; Male Urogenital Diseases; Immune System Diseases	1	Transporter	ALB	CURATED	213	DTO_05007405	2019	0.962	C0017662	P02768	Disease or Syndrome	Glomerulonephritis, Membranoproliferative	C13;C12;C20	0.31	1992	0.317
phenotype	0.00054909	limited		NA		APOA1	CURATED	335		NA	0.885	C4521256	P02647	Diagnostic Procedure	Glomerulopathy Assessment		0.3	NA	0.429
group	3.7625e-18	limited	Congenital, Hereditary, and Neonatal Diseases and Abnormalities; Nutritional and Metabolic Diseases	1	Kinase	PFKM	CURATED	5213	DTO_03300101	1997	0.5	C0017919	P08237	Disease or Syndrome	Glycogen Storage Disease	C16;C18	0.4	1994	0.666
group	2.702e-17	limited	Congenital, Hereditary, and Neonatal Diseases and Abnormalities; Nutritional and Metabolic Diseases	NA	Kinase	PFKL	CURATED	5211	DTO_03300101	NA	0.269	C0017919	P17858	Disease or Syndrome	Glycogen Storage Disease	C16;C18	0.3	NA	0.722
disease	0.030057		Congenital, Hereditary, and Neonatal Diseases and Abnormalities; Female Urogenital Diseases and Pregnancy Complications; Male Urogenital Diseases; Endocrine System Diseases; Cardiovascular Diseases	1	Signaling	GH1	CURATED	2688	DTO_05007599	2004	0.923	C0242526	P01241	Disease or Syndrome	Gonadal Dysgenesis, 45,X	C16;C13;C12;C19;C14	0.31	1979	0.373
disease	0.15499		Congenital, Hereditary, and Neonatal Diseases and Abnormalities; Female Urogenital Diseases and Pregnancy Complications; Male Urogenital Diseases; Endocrine System Diseases; Cardiovascular Diseases	1	Enzyme	SOD2	CURATED	6648	DTO_05007624	2014	0.923	C0242526	P04179	Disease or Syndrome	Gonadal Dysgenesis, 45,X	C16;C13;C12;C19;C14	0.3	2014	0.379
disease	6.9451e-10		Congenital, Hereditary, and Neonatal Diseases and Abnormalities; Nutritional and Metabolic Diseases; Musculoskeletal Diseases	1	Transporter	SLC2A9	CURATED	56606	DTO_05007405	2019	0.731	C0018099	Q9NRM0	Disease or Syndrome	Gout	C16;C18;C05	0.4	2007	0.619
phenotype	0.15499		Pathological Conditions, Signs and Symptoms; Respiratory Tract Diseases	1	Enzyme	SOD2	CURATED	6648	DTO_05007624	2000	0.923	C0018200	P04179	Pathologic Function	Granuloma, Respiratory Tract	C23;C08	0.3	2000	0.379
disease	2.5e-06		Respiratory Tract Diseases; Immune System Diseases; Cardiovascular Diseases	1	Immune response	HLA-DPA1	CURATED	3113	DTO_05007608	2017	0.846	C3495801	P20036	Disease or Syndrome	Granulomatosis with polyangiitis	C08;C20;C14	0.4	2013	0.552
group	0.030057		Pathological Conditions, Signs and Symptoms	1	Signaling	GH1	CURATED	2688	DTO_05007599	2004	0.923	C0018273	P01241	Pathologic Function	Growth Disorders	C23	0.3	2004	0.373
group	5.4379e-11		Pathological Conditions, Signs and Symptoms	1	Receptor	IGFALS	CURATED	3483	DTO_05007575	2007	0.846	C0018273	P35858	Pathologic Function	Growth Disorders	C23	0.3	2004	0.511
disease	0.030057		Neoplasms; Nervous System Diseases; Endocrine System Diseases	0.952	Signaling	GH1	CURATED	2688	DTO_05007599	2019	0.923	C0346302	P01241	Neoplastic Process	Growth Hormone-Secreting Pituitary Adenoma	C04;C10;C19	0.4	1991	0.373
phenotype	0.0003636		Pathological Conditions, Signs and Symptoms; Nervous System Diseases	1	Enzyme	ALPL	CURATED	249	DTO_05007624	2016	0.769	C0422854	P05186	Sign or Symptom	Gustatory seizure	C23;C10	0.3	1995	0.546
phenotype	0.0018685		Pathological Conditions, Signs and Symptoms; Nervous System Diseases	1		APOE	CURATED	348		2013	0.962	C0422854	P02649	Sign or Symptom	Gustatory seizure	C23;C10	0.3	2013	0.338
phenotype	0.0184		Pathological Conditions, Signs and Symptoms; Nervous System Diseases	1	Signaling	FGF2	CURATED	2247	DTO_05007599	2011	0.923	C0422854	P09038	Sign or Symptom	Gustatory seizure	C23;C10	0.3	2011	0.383
phenotype	0.15499		Pathological Conditions, Signs and Symptoms; Nervous System Diseases	1	Enzyme	SOD2	CURATED	6648	DTO_05007624	2010	0.923	C0422854	P04179	Sign or Symptom	Gustatory seizure	C23;C10	0.3	2010	0.379
phenotype	9.934e-07		Chemically-Induced Disorders; Mental Disorders	1	Enzyme	ADH1B	CURATED	125	DTO_05007624	2005	0.846	C0393756	P00325	Sign or Symptom	Hangover from alcohol	C25;F03	0.3	2005	0.502
disease	0.066228		Chemically-Induced Disorders; Mental Disorders	1	Receptor	SCARB1	CURATED	949	DTO_05007575	2006	0.731	C0018614	Q8WTV0	Disease or Syndrome	Hashish Abuse	C25;F03	0.3	2006	0.559
disease	1.4525e-13		Congenital, Hereditary, and Neonatal Diseases and Abnormalities; Nutritional and Metabolic Diseases	1	Transporter	ABCA1	CURATED	19	DTO_05007405	2001	0.846	C3711531	O95477	Disease or Syndrome	Hdl Deficiency, Type 2	C16;C18	0.3	1999	0.467
phenotype	0.0018685		Pathological Conditions, Signs and Symptoms; Nervous System Diseases; Otorhinolaryngologic Diseases	1		APOE	CURATED	348		2019	0.962	C1384666	P02649	Disease or Syndrome	hearing impairment	C23;C10;C09	0.33	2009	0.338
phenotype	0.64329		Cardiovascular Diseases	1	Transporter	ALB	CURATED	213	DTO_05007405	2001	0.962	C1961112	P02768	Pathologic Function	Heart Decompensation	C14	0.3	2001	0.317
phenotype	0.031714		Cardiovascular Diseases	1		APCS	CURATED	325		2005	0.808	C1961112	P02743	Pathologic Function	Heart Decompensation	C14	0.3	2005	0.531
phenotype	0.0036969		Cardiovascular Diseases	1		CRP	CURATED	1401		2005	0.962	C1961112	P02741	Pathologic Function	Heart Decompensation	C14	0.3	2005	0.299
phenotype	0.15499		Cardiovascular Diseases	1	Enzyme	SOD2	CURATED	6648	DTO_05007624	2011	0.923	C1961112	P04179	Pathologic Function	Heart Decompensation	C14	0.3	2005	0.379
group	0.64329		Cardiovascular Diseases	1	Transporter	ALB	CURATED	213	DTO_05007405	2019	0.962	C0018799	P02768	Disease or Syndrome	Heart Diseases	C14	0.35	2014	0.317
disease	0.64329		Cardiovascular Diseases	1	Transporter	ALB	CURATED	213	DTO_05007405	2020	0.962	C0018801	P02768	Disease or Syndrome	Heart failure	C14	0.4	2001	0.317
disease	0.0036969		Cardiovascular Diseases	0.947		CRP	CURATED	1401		2019	0.962	C0018801	P02741	Disease or Syndrome	Heart failure	C14	0.4	2005	0.299
disease	0.031714		Cardiovascular Diseases	1		APCS	CURATED	325		2005	0.808	C0018801	P02743	Disease or Syndrome	Heart failure	C14	0.3	2005	0.531
disease	0.0036969		Cardiovascular Diseases	1		CRP	CURATED	1401		2019	0.962	C0235527	P02741	Disease or Syndrome	Heart Failure, Right-Sided	C14	0.32	2005	0.299
disease	0.64329		Cardiovascular Diseases	1	Transporter	ALB	CURATED	213	DTO_05007405	2001	0.962	C0235527	P02768	Disease or Syndrome	Heart Failure, Right-Sided	C14	0.3	2001	0.317
disease	0.031714		Cardiovascular Diseases	1		APCS	CURATED	325		2005	0.808	C0235527	P02743	Disease or Syndrome	Heart Failure, Right-Sided	C14	0.3	2005	0.531
disease	0.15499		Cardiovascular Diseases	1	Enzyme	SOD2	CURATED	6648	DTO_05007624	2011	0.923	C0235527	P04179	Disease or Syndrome	Heart Failure, Right-Sided	C14	0.3	2005	0.379
group	0.65372		Cardiovascular Diseases	1	Kinase	JAK2	CURATED	3717	DTO_03300101	2011	0.885	C0018824	O60674	Disease or Syndrome	Heart valve disease	C14	0.3	2011	0.385
disease	0.0039011		Neoplasms; Nervous System Diseases	1		CST3	CURATED	1471		2010	0.808	C0334609	P01034	Neoplastic Process	Hemangioblastic Meningioma	C04;C10	0.3	2010	0.436
disease	0.0039011		Neoplasms; Nervous System Diseases	1		CST3	CURATED	1471		2010	0.808	C0334610	P01034	Neoplastic Process	Hemangiopericytic Meningioma	C04;C10	0.3	2010	0.436
group	0.00010289		Neoplasms; Hemic and Lymphatic Diseases	1		SH2B3	CURATED	10019		2017	0.692	C0376545	Q9UQQ2	Neoplastic Process	Hematologic Neoplasms	C04;C15	0.31	2017	0.527
disease	4.5964e-29		Nervous System Diseases	1	Ion channel	TRPM8	CURATED	79054	DTO_01300327	2011	0.808	C0018984	Q7Z2W7	Disease or Syndrome	Hemicrania migraine	C10	0.3	2011	0.553
disease	0.64329		Female Urogenital Diseases and Pregnancy Complications; Male Urogenital Diseases; Hemic and Lymphatic Diseases	1	Transporter	ALB	CURATED	213	DTO_05007405	1984	0.962	C0019061	P02768	Disease or Syndrome	Hemolytic-Uremic Syndrome	C13;C12;C15	0.3	1984	0.317
disease	0.0018685		Congenital, Hereditary, and Neonatal Diseases and Abnormalities; Digestive System Diseases; Nutritional and Metabolic Diseases; Nervous System Diseases	1		APOE	CURATED	348		2000	0.962	C1527352	P02649	Disease or Syndrome	Hepatic Form of Wilson Disease	C16;C06;C18;C10	0.3	2000	0.338
phenotype	0.64329		Digestive System Diseases	1	Transporter	ALB	CURATED	213	DTO_05007405	2018	0.962	C1306571	P02768	Pathologic Function	Hepatic Insufficiency	C06	0.3	2018	0.317
group	0.64329		Digestive System Diseases	1	Transporter	ALB	CURATED	213	DTO_05007405	2018	0.962	C0019158	P02768	Disease or Syndrome	Hepatitis	C06	0.36	2006	0.317
disease	0.066228		Digestive System Diseases; Infections	1	Receptor	SCARB1	CURATED	949	DTO_05007575	2018	0.731	C0019196	Q8WTV0	Disease or Syndrome	Hepatitis C	C06;C01	0.4	2003	0.559
disease	1.2712e-09		Digestive System Diseases; Infections	1	Enzyme	LPL	CURATED	4023	DTO_05007624	2017	0.808	C0019196	P06858	Disease or Syndrome	Hepatitis C	C06;C01	0.32	2007	0.474
disease	0.030182		Digestive System Diseases; Chemically-Induced Disorders	1	Nuclear receptor	PPARA	CURATED	5465	DTO_00102000	2014	0.885	C1262760	Q07869	Disease or Syndrome	Hepatitis, Drug-Induced	C06;C25	0.3	2014	0.432
disease	0.64329		Digestive System Diseases; Chemically-Induced Disorders	1	Transporter	ALB	CURATED	213	DTO_05007405	2012	0.962	C1262760	P02768	Disease or Syndrome	Hepatitis, Drug-Induced	C06;C25	0.3	2008	0.317
disease	0.00054909		Digestive System Diseases; Chemically-Induced Disorders	1		APOA1	CURATED	335		2005	0.885	C1262760	P02647	Disease or Syndrome	Hepatitis, Drug-Induced	C06;C25	0.3	2005	0.429
disease	0.0018685		Digestive System Diseases; Chemically-Induced Disorders	1		APOE	CURATED	348		2005	0.962	C1262760	P02649	Disease or Syndrome	Hepatitis, Drug-Induced	C06;C25	0.3	2005	0.338
disease	0.0036969		Digestive System Diseases; Chemically-Induced Disorders	1		CRP	CURATED	1401		2015	0.962	C1262760	P02741	Disease or Syndrome	Hepatitis, Drug-Induced	C06;C25	0.3	2015	0.299
disease	0.0011573		Digestive System Diseases; Chemically-Induced Disorders	1		GOT1	CURATED	2805		2014	0.692	C1262760	P17174	Disease or Syndrome	Hepatitis, Drug-Induced	C06;C25	0.3	2014	0.601
disease	3.5945e-19		Digestive System Diseases; Chemically-Induced Disorders	1	Enzyme	GPT	CURATED	2875	DTO_05007624	2009	0.923	C1262760	P24298	Disease or Syndrome	Hepatitis, Drug-Induced	C06;C25	0.3	1977	0.403
disease	0.010345		Digestive System Diseases; Chemically-Induced Disorders	1	Enzyme	PLG	CURATED	5340	DTO_05007624	2012	0.923	C1262760	P00747	Disease or Syndrome	Hepatitis, Drug-Induced	C06;C25	0.3	2012	0.389
disease	0.15499		Digestive System Diseases; Chemically-Induced Disorders	1	Enzyme	SOD2	CURATED	6648	DTO_05007624	2014	0.923	C1262760	P04179	Disease or Syndrome	Hepatitis, Drug-Induced	C06;C25	0.3	2014	0.379
disease	7.2668e-09		Digestive System Diseases; Chemically-Induced Disorders	1	Nuclear receptor	NR1I2	CURATED	8856	DTO_00102000	2017	0.846	C1262760	O75469	Disease or Syndrome	Hepatitis, Drug-Induced	C06;C25	0.3	2010	0.418
disease	0.00093892		Digestive System Diseases; Chemically-Induced Disorders	1	Nuclear receptor	NR1H4	CURATED	9971	DTO_00102000	2003	0.808	C1262760	Q96RI1	Disease or Syndrome	Hepatitis, Drug-Induced	C06;C25	0.3	2003	0.513
disease	0.90374		Digestive System Diseases; Chemically-Induced Disorders	1	Nuclear receptor	NR1H3	CURATED	10062	DTO_00102000	2007	0.692	C1262760	Q13133	Disease or Syndrome	Hepatitis, Drug-Induced	C06;C25	0.3	2007	0.566
disease	5.3634e-08		Digestive System Diseases; Chemically-Induced Disorders	1		UGT1A9	CURATED	54600		2011	0.577	C1262760	O60656	Disease or Syndrome	Hepatitis, Drug-Induced	C06;C25	0.3	2011	0.59
disease	0.030182		Digestive System Diseases; Chemically-Induced Disorders	1	Nuclear receptor	PPARA	CURATED	5465	DTO_00102000	2014	0.885	C0019193	Q07869	Injury or Poisoning	Hepatitis, Toxic	C06;C25	0.3	2014	0.432
disease	0.64329		Digestive System Diseases; Chemically-Induced Disorders	1	Transporter	ALB	CURATED	213	DTO_05007405	2012	0.962	C0019193	P02768	Injury or Poisoning	Hepatitis, Toxic	C06;C25	0.3	2008	0.317
disease	0.00054909		Digestive System Diseases; Chemically-Induced Disorders	1		APOA1	CURATED	335		2005	0.885	C0019193	P02647	Injury or Poisoning	Hepatitis, Toxic	C06;C25	0.3	2005	0.429
disease	0.0018685		Digestive System Diseases; Chemically-Induced Disorders	1		APOE	CURATED	348		2005	0.962	C0019193	P02649	Injury or Poisoning	Hepatitis, Toxic	C06;C25	0.3	2005	0.338
disease	0.0036969		Digestive System Diseases; Chemically-Induced Disorders	1		CRP	CURATED	1401		2015	0.962	C0019193	P02741	Injury or Poisoning	Hepatitis, Toxic	C06;C25	0.3	2015	0.299
disease	0.0011573		Digestive System Diseases; Chemically-Induced Disorders	1		GOT1	CURATED	2805		2014	0.692	C0019193	P17174	Injury or Poisoning	Hepatitis, Toxic	C06;C25	0.3	2014	0.601
disease	3.5945e-19		Digestive System Diseases; Chemically-Induced Disorders	1	Enzyme	GPT	CURATED	2875	DTO_05007624	2009	0.923	C0019193	P24298	Injury or Poisoning	Hepatitis, Toxic	C06;C25	0.3	1977	0.403
disease	0.010345		Digestive System Diseases; Chemically-Induced Disorders	1	Enzyme	PLG	CURATED	5340	DTO_05007624	2012	0.923	C0019193	P00747	Injury or Poisoning	Hepatitis, Toxic	C06;C25	0.3	2012	0.389
disease	0.15499		Digestive System Diseases; Chemically-Induced Disorders	1	Enzyme	SOD2	CURATED	6648	DTO_05007624	2014	0.923	C0019193	P04179	Injury or Poisoning	Hepatitis, Toxic	C06;C25	0.3	2014	0.379
disease	7.2668e-09		Digestive System Diseases; Chemically-Induced Disorders	1	Nuclear receptor	NR1I2	CURATED	8856	DTO_00102000	2017	0.846	C0019193	O75469	Injury or Poisoning	Hepatitis, Toxic	C06;C25	0.3	2010	0.418
disease	0.00093892		Digestive System Diseases; Chemically-Induced Disorders	1	Nuclear receptor	NR1H4	CURATED	9971	DTO_00102000	2003	0.808	C0019193	Q96RI1	Injury or Poisoning	Hepatitis, Toxic	C06;C25	0.3	2003	0.513
disease	0.90374		Digestive System Diseases; Chemically-Induced Disorders	1	Nuclear receptor	NR1H3	CURATED	10062	DTO_00102000	2007	0.692	C0019193	Q13133	Injury or Poisoning	Hepatitis, Toxic	C06;C25	0.3	2007	0.566
disease	5.3634e-08		Digestive System Diseases; Chemically-Induced Disorders	1		UGT1A9	CURATED	54600		2011	0.577	C0019193	O60656	Injury or Poisoning	Hepatitis, Toxic	C06;C25	0.3	2011	0.59
disease	0.0018685		Congenital, Hereditary, and Neonatal Diseases and Abnormalities; Digestive System Diseases; Nutritional and Metabolic Diseases; Nervous System Diseases	1		APOE	CURATED	348		2019	0.962	C0019202	P02649	Disease or Syndrome	Hepatolenticular Degeneration	C16;C06;C18;C10	0.36	2000	0.338
disease	0.65372		Digestive System Diseases; Neoplasms	1	Kinase	JAK2	CURATED	3717	DTO_03300101	2017	0.885	C0019207	O60674	Neoplastic Process; Experimental Model of Disease	Hepatoma, Morris	C06;C04	0.3	2017	0.385
disease	0.65372		Digestive System Diseases; Neoplasms	1	Kinase	JAK2	CURATED	3717	DTO_03300101	2017	0.885	C0019208	O60674	Neoplastic Process; Experimental Model of Disease	Hepatoma, Novikoff	C06;C04	0.3	2017	0.385
phenotype	0.64329		Pathological Conditions, Signs and Symptoms; Digestive System Diseases	1	Transporter	ALB	CURATED	213	DTO_05007405	2018	0.962	C0019209	P02768	Finding	Hepatomegaly	C23;C06	0.3	2018	0.317
phenotype	0.030182		Pathological Conditions, Signs and Symptoms; Digestive System Diseases	1	Nuclear receptor	PPARA	CURATED	5465	DTO_00102000	2004	0.885	C0019209	Q07869	Finding	Hepatomegaly	C23;C06	0.3	2004	0.432
phenotype	7.2668e-09		Pathological Conditions, Signs and Symptoms; Digestive System Diseases	1	Nuclear receptor	NR1I2	CURATED	8856	DTO_00102000	2013	0.846	C0019209	O75469	Finding	Hepatomegaly	C23;C06	0.3	2013	0.418
phenotype	0.00093892		Pathological Conditions, Signs and Symptoms; Digestive System Diseases	1	Nuclear receptor	NR1H4	CURATED	9971	DTO_00102000	2017	0.808	C0019209	Q96RI1	Finding	Hepatomegaly	C23;C06	0.3	2017	0.513
disease	0.64329		Digestive System Diseases; Neoplasms	1	Transporter	ALB	CURATED	213	DTO_05007405	2009	0.962	C1708349	P02768	Neoplastic Process	Hereditary Diffuse Gastric Cancer	C06;C04	0.3	2009	0.317
disease	0.00054909		Digestive System Diseases; Neoplasms	1		APOA1	CURATED	335		2009	0.885	C1708349	P02647	Neoplastic Process	Hereditary Diffuse Gastric Cancer	C06;C04	0.3	2004	0.429
disease	0.91029		Digestive System Diseases; Neoplasms	1	Enzyme modulator	IGFBP3	CURATED	3486	DTO_05007584	2006	0.808	C1708349	P17936	Neoplastic Process	Hereditary Diffuse Gastric Cancer	C06;C04	0.3	2006	0.439
disease	0.15499		Digestive System Diseases; Neoplasms	1	Enzyme	SOD2	CURATED	6648	DTO_05007624	2014	0.923	C1708349	P04179	Neoplastic Process	Hereditary Diffuse Gastric Cancer	C06;C04	0.3	2000	0.379
disease	0.046698		Digestive System Diseases	1	G-protein coupled receptor	CASR	CURATED	846	DTO_02300001	2015	0.846	C0238339	P41180	Disease or Syndrome	Hereditary pancreatitis	C06	0.3	2015	0.41
group	0.96926		Infections; Skin and Connective Tissue Diseases	1		NECTIN2	CURATED	5819		2018	0.769	C0019348	Q92692	Disease or Syndrome	Herpes Simplex Infections	C01;C17	0.33	1999	0.575
disease	0.64329		Female Urogenital Diseases and Pregnancy Complications; Male Urogenital Diseases; Immune System Diseases	1	Transporter	ALB	CURATED	213	DTO_05007405	2007	0.962	C1704378	P02768	Disease or Syndrome	Heymann Nephritis	C13;C12;C20	0.3	1992	0.317
disease	0.00054909		Female Urogenital Diseases and Pregnancy Complications; Male Urogenital Diseases; Immune System Diseases	1		APOA1	CURATED	335		1995	0.885	C1704378	P02647	Disease or Syndrome	Heymann Nephritis	C13;C12;C20	0.3	1995	0.429
disease	1	limited	Congenital, Hereditary, and Neonatal Diseases and Abnormalities; Digestive System Diseases	1		ARID1B	CURATED	57492		2016	0.846	C0019569	Q8NFD5	Disease or Syndrome	Hirschsprung Disease	C16;C06	0.31	2016	0.503
disease	2.4971e-23		Congenital, Hereditary, and Neonatal Diseases and Abnormalities; Female Urogenital Diseases and Pregnancy Complications; Male Urogenital Diseases	1		HAL	CURATED	3034		2005	0.538	C0268642	P42357	Disease or Syndrome	Histidinuria renal tubular defect	C16;C13;C12	0.4	2005	0.641
disease	0.64329		Infections; Immune System Diseases	1	Transporter	ALB	CURATED	213	DTO_05007405	2006	0.962	C4505456	P02768	Disease or Syndrome	HIV Coinfection	C01;C20	0.3	2006	0.317
disease	0.00054909		Infections; Immune System Diseases	1		APOA1	CURATED	335		2003	0.885	C4505456	P02647	Disease or Syndrome	HIV Coinfection	C01;C20	0.3	2003	0.429
group	0.00054909		Infections; Immune System Diseases	1		APOA1	CURATED	335		2018	0.885	C0019693	P02647	Disease or Syndrome	HIV Infections	C01;C20	0.32	2003	0.429
phenotype	0.64329		Infections; Immune System Diseases	1	Transporter	ALB	CURATED	213	DTO_05007405	2007	0.962	C0019699	P02768	Laboratory or Test Result	HIV Seropositivity	C01;C20	0.3	2007	0.317
disease	3.2577e-06		Neoplasms; Immune System Diseases; Hemic and Lymphatic Diseases	1		UGT1A1	CURATED	54658		2014	0.769	C0019829	P22309	Neoplastic Process	Hodgkin Disease	C04;C20;C15	0.33	2009	0.464
disease	3.2577e-06		Neoplasms; Immune System Diseases; Hemic and Lymphatic Diseases	1		UGT1A1	CURATED	54658		2009	0.769	C0152267	P22309	Neoplastic Process	Hodgkin lymphoma, lymphocyte depletion	C04;C20;C15	0.3	2009	0.464
disease	3.2577e-06		Pathological Conditions, Signs and Symptoms	0.955		UGT1A1	CURATED	54658		2020	0.769	C0020433	P22309	Disease or Syndrome	Hyperbilirubinemia	C23	0.4	1996	0.464
phenotype	1.1086e-21	limited		1	Transporter	SLCO1B1	CURATED	10599	DTO_05007405	2012	0.731	C4016905	Q9Y6L6	Finding	HYPERBILIRUBINEMIA, ROTOR TYPE, DIGENIC		0.3	2012	0.538
phenotype	5.321e-24	limited		1	Transporter	SLCO1B3	CURATED	28234	DTO_05007405	2012	0.769	C4016905	Q9NPD5	Finding	HYPERBILIRUBINEMIA, ROTOR TYPE, DIGENIC		0.3	2012	0.592
disease	6.5917e-89		Nutritional and Metabolic Diseases	0.957	Enzyme	LPA	CURATED	4018	DTO_05007624	2019	0.769	C0020443	P08519	Disease or Syndrome	Hypercholesterolemia	C18	0.4	1994	0.444
disease	0.00054909		Nutritional and Metabolic Diseases	0.833		APOA1	CURATED	335		2019	0.885	C0020443	P02647	Disease or Syndrome	Hypercholesterolemia	C18	0.36	1990	0.429
disease	0.066228		Nutritional and Metabolic Diseases	1	Receptor	SCARB1	CURATED	949	DTO_05007575	2019	0.731	C0020443	Q8WTV0	Disease or Syndrome	Hypercholesterolemia	C18	0.35	2003	0.559
disease	0.08102		Nutritional and Metabolic Diseases	NA	Enzyme	LCAT	CURATED	3931	DTO_05007624	NA	0.654	C0020443	P04180	Disease or Syndrome	Hypercholesterolemia	C18	0.3	NA	0.588
disease	1.6455e-13		Nutritional and Metabolic Diseases	NA	Signaling	ANGPTL3	CURATED	27329	DTO_05007599	NA	0.577	C0020443	Q9Y5C1	Disease or Syndrome	Hypercholesterolemia	C18	0.3	NA	0.584
disease	0.0018685		Congenital, Hereditary, and Neonatal Diseases and Abnormalities; Nutritional and Metabolic Diseases	0.875		APOE	CURATED	348		2020	0.962	C0020445	P02649	Disease or Syndrome	Hypercholesterolemia, Familial	C16;C18	0.4	1991	0.338
disease	1.1892e-23		Congenital, Hereditary, and Neonatal Diseases and Abnormalities; Nutritional and Metabolic Diseases	1		CETP	CURATED	1071		2011	0.731	C0020445	P11597	Disease or Syndrome	Hypercholesterolemia, Familial	C16;C18	0.39	1997	0.512
disease	1.4525e-13		Congenital, Hereditary, and Neonatal Diseases and Abnormalities; Nutritional and Metabolic Diseases	1	Transporter	ABCA1	CURATED	19	DTO_05007405	2019	0.846	C0020445	O95477	Disease or Syndrome	Hypercholesterolemia, Familial	C16;C18	0.33	2003	0.467
disease	3.081e-21	strong	Congenital, Hereditary, and Neonatal Diseases and Abnormalities; Nutritional and Metabolic Diseases	1	Transporter	ABCG5	CURATED	64240	DTO_05007405	2018	0.577	C0020445	Q9H222	Disease or Syndrome	Hypercholesterolemia, Familial	C16;C18	0.33	2010	0.592
disease	3.2764e-07		Congenital, Hereditary, and Neonatal Diseases and Abnormalities; Nutritional and Metabolic Diseases	1	Enzyme	LIPC	CURATED	3990	DTO_05007624	2014	0.654	C0020445	P11150	Disease or Syndrome	Hypercholesterolemia, Familial	C16;C18	0.32	2005	0.585
disease	0.010024		Congenital, Hereditary, and Neonatal Diseases and Abnormalities; Nutritional and Metabolic Diseases	1		APOC3	CURATED	345		2005	0.731	C0020445	P02656	Disease or Syndrome	Hypercholesterolemia, Familial	C16;C18	0.3	2005	0.531
disease	1.9234e-16	definitive		1		APOB	CURATED	338		2014	0.808	C3888316	P04114	Disease or Syndrome	Hypercholesterolemia, familial, due to ligand-defective apolipoprotein B		0.3	1987	0.453
disease	3.2764e-07		Cardiovascular Diseases	1	Enzyme	LIPC	CURATED	3990	DTO_05007624	2006	0.654	C0020452	P11150	Disease or Syndrome	Hyperemia	C14	0.3	2006	0.585
disease	0.99998	limited	Hemic and Lymphatic Diseases	1	Kinase	JAK1	CURATED	3716	DTO_03300101	2017	0.769	C1540912	P23458	Disease or Syndrome	Hypereosinophilic syndrome	C15	0.3	2017	0.474
phenotype	0.63464		Nutritional and Metabolic Diseases	1	Kinase	GCK	CURATED	2645	DTO_03300101	2008	0.808	C1855520	P35557	Finding	Hyperglycemia, Postprandial	C18	0.3	2008	0.523
disease	0.63464		Congenital, Hereditary, and Neonatal Diseases and Abnormalities; Digestive System Diseases; Nutritional and Metabolic Diseases	1	Kinase	GCK	CURATED	2645	DTO_03300101	2004	0.808	C2931832	P35557	Disease or Syndrome	Hyperinsulinemic hypoglycemia, familial, 1	C16;C06;C18	0.3	2004	0.523
disease	0.63464		Congenital, Hereditary, and Neonatal Diseases and Abnormalities; Digestive System Diseases; Nutritional and Metabolic Diseases	1	Kinase	GCK	CURATED	2645	DTO_03300101	2004	0.808	C2931833	P35557	Disease or Syndrome	Hyperinsulinemic hypoglycemia, familial, 2	C16;C06;C18	0.3	2004	0.523
disease	0.030182		Nutritional and Metabolic Diseases	1	Nuclear receptor	PPARA	CURATED	5465	DTO_00102000	2020	0.885	C0020473	Q07869	Disease or Syndrome	Hyperlipidemia	C18	0.4	2007	0.432
disease	1.1892e-23		Congenital, Hereditary, and Neonatal Diseases and Abnormalities; Nutritional and Metabolic Diseases	1		CETP	CURATED	1071		2011	0.731	C0745103	P11597	Disease or Syndrome	Hyperlipoproteinemia Type IIa	C16;C18	0.36	1997	0.512
disease	3.2764e-07		Congenital, Hereditary, and Neonatal Diseases and Abnormalities; Nutritional and Metabolic Diseases	1	Enzyme	LIPC	CURATED	3990	DTO_05007624	2014	0.654	C0745103	P11150	Disease or Syndrome	Hyperlipoproteinemia Type IIa	C16;C18	0.31	2005	0.585
disease	0.010024		Congenital, Hereditary, and Neonatal Diseases and Abnormalities; Nutritional and Metabolic Diseases	1		APOC3	CURATED	345		2005	0.731	C0745103	P02656	Disease or Syndrome	Hyperlipoproteinemia Type IIa	C16;C18	0.3	2005	0.531
disease	9.841e-24		Congenital, Hereditary, and Neonatal Diseases and Abnormalities; Nutritional and Metabolic Diseases	1		LDLR	CURATED	3949		2017	0.885	C1704417	P01130	Disease or Syndrome	Hyperlipoproteinemia Type IIb	C16;C18	0.4	1990	0.449
disease	0.0018685		Congenital, Hereditary, and Neonatal Diseases and Abnormalities; Nutritional and Metabolic Diseases	1		APOE	CURATED	348		2007	0.962	C1704417	P02649	Disease or Syndrome	Hyperlipoproteinemia Type IIb	C16;C18	0.32	1985	0.338
disease	1.2712e-09		Congenital, Hereditary, and Neonatal Diseases and Abnormalities; Nutritional and Metabolic Diseases	1	Enzyme	LPL	CURATED	4023	DTO_05007624	2007	0.808	C1704417	P06858	Disease or Syndrome	Hyperlipoproteinemia Type IIb	C16;C18	0.32	1996	0.474
disease	1.4525e-13		Congenital, Hereditary, and Neonatal Diseases and Abnormalities; Nutritional and Metabolic Diseases	1	Transporter	ABCA1	CURATED	19	DTO_05007405	2005	0.846	C1704417	O95477	Disease or Syndrome	Hyperlipoproteinemia Type IIb	C16;C18	0.3	2005	0.467
disease	0.010024		Congenital, Hereditary, and Neonatal Diseases and Abnormalities; Nutritional and Metabolic Diseases	1		APOC3	CURATED	345		2005	0.731	C1704417	P02656	Disease or Syndrome	Hyperlipoproteinemia Type IIb	C16;C18	0.3	2005	0.531
disease	1.1892e-23		Congenital, Hereditary, and Neonatal Diseases and Abnormalities; Nutritional and Metabolic Diseases	1		CETP	CURATED	1071		2005	0.731	C1704417	P11597	Disease or Syndrome	Hyperlipoproteinemia Type IIb	C16;C18	0.3	2005	0.512
disease	3.2764e-07		Congenital, Hereditary, and Neonatal Diseases and Abnormalities; Nutritional and Metabolic Diseases	1	Enzyme	LIPC	CURATED	3990	DTO_05007624	2005	0.654	C1704417	P11150	Disease or Syndrome	Hyperlipoproteinemia Type IIb	C16;C18	0.3	2005	0.585
disease	5.5765e-10		Congenital, Hereditary, and Neonatal Diseases and Abnormalities; Nutritional and Metabolic Diseases	1		APOA5	CURATED	116519		2011	0.615	C0020479	Q6Q788	Disease or Syndrome	Hyperlipoproteinemia Type III	C16;C18	0.33	2005	0.587
disease	1.1892e-23		Nutritional and Metabolic Diseases	1		CETP	CURATED	1071		2001	0.731	C0020476	P11597	Disease or Syndrome	Hyperlipoproteinemias	C18	0.31	1990	0.512
disease	0.010024		Nutritional and Metabolic Diseases	1		APOC3	CURATED	345		1991	0.731	C0020476	P02656	Disease or Syndrome	Hyperlipoproteinemias	C18	0.3	1991	0.531
disease	0.030182		Nutritional and Metabolic Diseases	1	Nuclear receptor	PPARA	CURATED	5465	DTO_00102000	2000	0.885	C0020476	Q07869	Disease or Syndrome	Hyperlipoproteinemias	C18	0.3	2000	0.432
disease	0.0003636		Endocrine System Diseases	1	Enzyme	ALPL	CURATED	249	DTO_05007624	2012	0.769	C0020503	P05186	Disease or Syndrome	Hyperparathyroidism, Secondary	C19	0.3	2012	0.546
disease	0.0036969		Endocrine System Diseases	1		CRP	CURATED	1401		2011	0.962	C0020503	P02741	Disease or Syndrome	Hyperparathyroidism, Secondary	C19	0.3	2011	0.299
phenotype	0.00091697		Pathological Conditions, Signs and Symptoms	1	G-protein coupled receptor	MC4R	CURATED	4160	DTO_02300001	2012	0.692	C0020505	P32245	Finding	Hyperphagia	C23	0.4	2012	0.535
phenotype	9.841e-24		Pathological Conditions, Signs and Symptoms	1		LDLR	CURATED	3949		1997	0.885	C0020507	P01130	Pathologic Function	Hyperplasia	C23	0.3	1997	0.449
group	0.64329		Immune System Diseases	1	Transporter	ALB	CURATED	213	DTO_05007405	1993	0.962	C0020517	P02768	Pathologic Function	Hypersensitivity	C20	0.3	1993	0.317
group	0.64329		Cardiovascular Diseases	0.947	Transporter	ALB	CURATED	213	DTO_05007405	2020	0.962	C0020538	P02768	Disease or Syndrome	Hypertensive disease	C14	0.4	1989	0.317
group	1.2712e-09		Cardiovascular Diseases	0.8	Enzyme	LPL	CURATED	4023	DTO_05007624	2017	0.808	C0020538	P06858	Disease or Syndrome	Hypertensive disease	C14	0.4	1998	0.474
group	0.010345		Cardiovascular Diseases	1	Enzyme	PLG	CURATED	5340	DTO_05007624	2019	0.923	C0020538	P00747	Disease or Syndrome	Hypertensive disease	C14	0.35	1984	0.389
group	1.1892e-23		Cardiovascular Diseases	1		CETP	CURATED	1071		2017	0.731	C0020538	P11597	Disease or Syndrome	Hypertensive disease	C14	0.33	1999	0.512
disease	0.15499		Endocrine System Diseases	1	Enzyme	SOD2	CURATED	6648	DTO_05007624	2010	0.923	C0020550	P04179	Disease or Syndrome	Hyperthyroidism	C19	0.3	2010	0.379
phenotype	0.0036969		Nutritional and Metabolic Diseases	0.909		CRP	CURATED	1401		2019	0.962	C0020557	P02741	Disease or Syndrome	Hypertriglyceridemia	C18	0.4	2002	0.299
phenotype	1.1892e-23		Nutritional and Metabolic Diseases	1		CETP	CURATED	1071		2017	0.731	C0020557	P11597	Disease or Syndrome	Hypertriglyceridemia	C18	0.39	1994	0.512
phenotype	0.030182		Nutritional and Metabolic Diseases	1	Nuclear receptor	PPARA	CURATED	5465	DTO_00102000	2020	0.885	C0020557	Q07869	Disease or Syndrome	Hypertriglyceridemia	C18	0.4	2004	0.432
disease	1.4525e-13		Congenital, Hereditary, and Neonatal Diseases and Abnormalities; Nutritional and Metabolic Diseases	1	Transporter	ABCA1	CURATED	19	DTO_05007405	2020	0.846	C0473527	O95477	Disease or Syndrome	Hypoalphalipoproteinemias	C16;C18	0.4	2002	0.467
disease	1.6455e-13		Congenital, Hereditary, and Neonatal Diseases and Abnormalities; Nutritional and Metabolic Diseases	NA	Signaling	ANGPTL3	CURATED	27329	DTO_05007599	NA	0.577	C1857970	Q9Y5C1	Disease or Syndrome	Hypobetalipoproteinemia, Familial, 2	C16;C18	0.4	NA	0.584
disease	1.9234e-16		Nutritional and Metabolic Diseases	1		APOB	CURATED	338		1995	0.808	C1704299	P04114	Disease or Syndrome	Hypobetalipoproteinemia, Familial, Apolipoprotein B	C18	0.31	1987	0.453
disease	0.046698		Nutritional and Metabolic Diseases; Female Urogenital Diseases and Pregnancy Complications; Male Urogenital Diseases; Endocrine System Diseases	NA	G-protein coupled receptor	CASR	CURATED	846	DTO_02300001	NA	0.846	C1832612	P41180	Disease or Syndrome	Hypocalcemia, Autosomal Dominant, with Bartter Syndrome	C18;C13;C12;C19	0.3	NA	0.41
disease	0.046698	strong	Nutritional and Metabolic Diseases	1	G-protein coupled receptor	CASR	CURATED	846	DTO_02300001	2017	0.846	C3875492	P41180	Disease or Syndrome	Hypocalciuric hypercalcemia	C18	0.37	1998	0.41
disease	0.030182		Nutritional and Metabolic Diseases	1	Nuclear receptor	PPARA	CURATED	5465	DTO_00102000	2006	0.885	C0020615	Q07869	Disease or Syndrome	Hypoglycemia	C18	0.3	2006	0.432
disease	0.15499		Nutritional and Metabolic Diseases	1	Enzyme	SOD2	CURATED	6648	DTO_05007624	2010	0.923	C0020615	P04179	Disease or Syndrome	Hypoglycemia	C18	0.3	2010	0.379
phenotype	6.5917e-89		Congenital, Hereditary, and Neonatal Diseases and Abnormalities; Nutritional and Metabolic Diseases	1	Enzyme	LPA	CURATED	4018	DTO_05007624	1999	0.769	C0020623	P08519	Finding	Hypolipoproteinemias	C16;C18	0.3	1999	0.444
disease	0.046698		Endocrine System Diseases	0.667	G-protein coupled receptor	CASR	CURATED	846	DTO_02300001	2017	0.846	C1832648	P41180	Disease or Syndrome	Hypoparathyroidism familial isolated	C19	0.33	1997	0.41
phenotype	7.2668e-09		Nutritional and Metabolic Diseases	1	Nuclear receptor	NR1I2	CURATED	8856	DTO_00102000	2010	0.846	C0085682	O75469	Disease or Syndrome	Hypophosphatemia	C18	0.3	2010	0.418
disease	6.5917e-89		Congenital, Hereditary, and Neonatal Diseases and Abnormalities; Nutritional and Metabolic Diseases	1	Enzyme	LPA	CURATED	4018	DTO_05007624	1999	0.769	C1720772	P08519	Disease or Syndrome	Hypoprebetalipoproteinemia	C16;C18	0.3	1999	0.444
phenotype	0.64329		Cardiovascular Diseases	1	Transporter	ALB	CURATED	213	DTO_05007405	2001	0.962	C0020649	P02768	Finding	Hypotension	C14	0.4	1974	0.317
phenotype	0.00054909		Pathological Conditions, Signs and Symptoms	1		APOA1	CURATED	335		2008	0.885	C0700292	P02647	Finding	Hypoxemia	C23	0.3	2008	0.429
phenotype	0.15499		Pathological Conditions, Signs and Symptoms	1	Enzyme	SOD2	CURATED	6648	DTO_05007624	2009	0.923	C0700292	P04179	Finding	Hypoxemia	C23	0.3	2008	0.379
phenotype	0.00054909		Pathological Conditions, Signs and Symptoms	1		APOA1	CURATED	335		2008	0.885	C0242184	P02647	Pathologic Function	Hypoxia	C23	0.3	2008	0.429
phenotype	0.15499		Pathological Conditions, Signs and Symptoms	1	Enzyme	SOD2	CURATED	6648	DTO_05007624	2009	0.923	C0242184	P04179	Pathologic Function	Hypoxia	C23	0.3	2008	0.379
phenotype	7.2668e-09		Pathological Conditions, Signs and Symptoms; Congenital, Hereditary, and Neonatal Diseases and Abnormalities	1	Nuclear receptor	NR1I2	CURATED	8856	DTO_00102000	2012	0.846	C1566050	O75469	Disease or Syndrome	Icterus Gravis Neonatorum	C23;C16	0.3	2012	0.418
disease	3.0504e-07		Nervous System Diseases	1	Enzyme	ALDH5A1	CURATED	7915	DTO_05007624	2007	0.462	C0393598	P51649	Disease or Syndrome	Idiopathic familial dystonia	C10	0.3	2007	0.619
disease	0.046698		Nervous System Diseases	1	G-protein coupled receptor	CASR	CURATED	846	DTO_02300001	2008	0.846	C0270850	P41180	Disease or Syndrome	Idiopathic generalized epilepsy	C10	0.31	2008	0.41
disease	0.046698		Endocrine System Diseases	1	G-protein coupled receptor	CASR	CURATED	846	DTO_02300001	2017	0.846	C0342342	P41180	Disease or Syndrome	Idiopathic Hypoparathyroidism	C19	0.4	2000	0.41
disease	0.64329		Female Urogenital Diseases and Pregnancy Complications; Male Urogenital Diseases; Immune System Diseases	0.923	Transporter	ALB	CURATED	213	DTO_05007405	2019	0.962	C0086445	P02768	Disease or Syndrome	Idiopathic Membranous Glomerulonephritis	C13;C12;C20	0.37	1992	0.317
disease	0.00054909		Female Urogenital Diseases and Pregnancy Complications; Male Urogenital Diseases; Immune System Diseases	1		APOA1	CURATED	335		1995	0.885	C0086445	P02647	Disease or Syndrome	Idiopathic Membranous Glomerulonephritis	C13;C12;C20	0.3	1995	0.429
disease	0.0036969		Digestive System Diseases	1		CRP	CURATED	1401		2001	0.962	C0949272	P02741	Disease or Syndrome	IIeocolitis	C06	0.3	2001	0.299
disease	0.030182		Digestive System Diseases	1	Nuclear receptor	PPARA	CURATED	5465	DTO_00102000	2011	0.885	C0949272	Q07869	Disease or Syndrome	IIeocolitis	C06	0.3	2011	0.432
disease	0.00093892		Digestive System Diseases	1	Nuclear receptor	NR1H4	CURATED	9971	DTO_00102000	2011	0.808	C0949272	Q96RI1	Disease or Syndrome	IIeocolitis	C06	0.3	2011	0.513
disease	0.96452		Digestive System Diseases	1		ATG16L1	CURATED	55054		2008	0.769	C0949272	Q676U5	Disease or Syndrome	IIeocolitis	C06	0.3	2007	0.543
disease	2.0908e-15		Immune System Diseases	NA		TNFRSF13B	CURATED	23495		NA	0.769	C2936665	O14836	Disease or Syndrome	Immunoglobulin Deficiency, Late-Onset	C20	0.3	NA	0.558
disease	0.96926		Mental Disorders	1		NECTIN2	CURATED	5819		2019	0.769	C0338656	Q92692	Mental or Behavioral Dysfunction	Impaired cognition	F03	0.4	2018	0.575
disease	3.2577e-06		Pathological Conditions, Signs and Symptoms; Congenital, Hereditary, and Neonatal Diseases and Abnormalities	1		UGT1A1	CURATED	54658		2017	0.769	C1565886	P22309	Disease or Syndrome	Indirect Hyperbilirubinemia, Neonatal	C23;C16	0.3	2017	0.464
phenotype	0.00054909		Pathological Conditions, Signs and Symptoms; Nutritional and Metabolic Diseases	1		APOA1	CURATED	335		2014	0.885	C4704955	P02647	Finding	Infant Overweight	C23;C18	0.3	2014	0.429
phenotype	1.1892e-23		Pathological Conditions, Signs and Symptoms; Nutritional and Metabolic Diseases	1		CETP	CURATED	1071		2014	0.731	C4704955	P11597	Finding	Infant Overweight	C23;C18	0.3	2014	0.512
phenotype	5.5765e-10		Pathological Conditions, Signs and Symptoms; Nutritional and Metabolic Diseases	1		APOA5	CURATED	116519		2014	0.615	C4704955	Q6Q788	Finding	Infant Overweight	C23;C18	0.3	2014	0.587
phenotype	0.00054909		Pathological Conditions, Signs and Symptoms; Nutritional and Metabolic Diseases	1		APOA1	CURATED	335		2014	0.885	C4553478	P02647	Disease or Syndrome	Infantile Obesity	C23;C18	0.3	2014	0.429
phenotype	1.1892e-23		Pathological Conditions, Signs and Symptoms; Nutritional and Metabolic Diseases	1		CETP	CURATED	1071		2014	0.731	C4553478	P11597	Disease or Syndrome	Infantile Obesity	C23;C18	0.3	2014	0.512
phenotype	5.5765e-10		Pathological Conditions, Signs and Symptoms; Nutritional and Metabolic Diseases	1		APOA5	CURATED	116519		2014	0.615	C4553478	Q6Q788	Disease or Syndrome	Infantile Obesity	C23;C18	0.3	2014	0.587
disease	0.15499		Pathological Conditions, Signs and Symptoms; Nervous System Diseases; Cardiovascular Diseases	1	Enzyme	SOD2	CURATED	6648	DTO_05007624	2011	0.923	C0740392	P04179	Disease or Syndrome	Infarction, Middle Cerebral Artery	C23;C10;C14	0.3	2011	0.379
group	0.0036969		Infections	1		CRP	CURATED	1401		2008	0.962	C3714514	P02741	Pathologic Function	Infection	C01	0.35	1988	0.299
phenotype	0.00054909		Pathological Conditions, Signs and Symptoms	1		APOA1	CURATED	335		2011	0.885	C0021368	P02647	Pathologic Function	Inflammation	C23	0.31	2008	0.429
phenotype	0.65372		Pathological Conditions, Signs and Symptoms	1	Kinase	JAK2	CURATED	3717	DTO_03300101	2011	0.885	C0021368	O60674	Pathologic Function	Inflammation	C23	0.3	2011	0.385
phenotype	0.030182		Pathological Conditions, Signs and Symptoms	1	Nuclear receptor	PPARA	CURATED	5465	DTO_00102000	2011	0.885	C0021368	Q07869	Pathologic Function	Inflammation	C23	0.31	2004	0.432
phenotype	0.99985		Pathological Conditions, Signs and Symptoms	1	Nuclear receptor	RORC	CURATED	6097	DTO_00102000	2012	0.769	C0021368	P51449	Pathologic Function	Inflammation	C23	0.3	2012	0.576
phenotype	0.99892		Pathological Conditions, Signs and Symptoms	1	Cellular structure	WDR1	CURATED	9948	DTO_05007530	2007	0.654	C0021368	O75083	Pathologic Function	Inflammation	C23	0.3	2007	0.623
phenotype	0.00093892		Pathological Conditions, Signs and Symptoms	1	Nuclear receptor	NR1H4	CURATED	9971	DTO_00102000	2017	0.808	C0021368	Q96RI1	Pathologic Function	Inflammation	C23	0.3	2017	0.513
phenotype	0.00010289		Pathological Conditions, Signs and Symptoms	1		SH2B3	CURATED	10019		2011	0.692	C0021368	Q9UQQ2	Pathologic Function	Inflammation	C23	0.3	2011	0.527
phenotype	5.4379e-11		Nutritional and Metabolic Diseases	1	Receptor	IGFALS	CURATED	3483	DTO_05007575	2007	0.846	C0021655	P35858	Pathologic Function	Insulin Resistance	C18	0.4	2007	0.511
phenotype	3.2764e-07		Nutritional and Metabolic Diseases	1	Enzyme	LIPC	CURATED	3990	DTO_05007624	2004	0.654	C0021655	P11150	Pathologic Function	Insulin Resistance	C18	0.4	2004	0.585
phenotype	0.030057		Nutritional and Metabolic Diseases	1	Signaling	GH1	CURATED	2688	DTO_05007599	2011	0.923	C0021655	P01241	Pathologic Function	Insulin Resistance	C18	0.3	2011	0.373
phenotype	0.00091697		Nutritional and Metabolic Diseases	1	G-protein coupled receptor	MC4R	CURATED	4160	DTO_02300001	2008	0.692	C0021655	P32245	Pathologic Function	Insulin Resistance	C18	0.3	2008	0.535
phenotype	0.030182		Nutritional and Metabolic Diseases	1	Nuclear receptor	PPARA	CURATED	5465	DTO_00102000	2011	0.885	C0021655	Q07869	Pathologic Function	Insulin Resistance	C18	0.3	2005	0.432
phenotype	0.15499		Nutritional and Metabolic Diseases	1	Enzyme	SOD2	CURATED	6648	DTO_05007624	2012	0.923	C0021655	P04179	Pathologic Function	Insulin Resistance	C18	0.3	2012	0.379
phenotype	0.030057		Nutritional and Metabolic Diseases	1	Signaling	GH1	CURATED	2688	DTO_05007599	2011	0.923	C0920563	P01241	Pathologic Function	Insulin Sensitivity	C18	0.3	2011	0.373
phenotype	5.4379e-11		Nutritional and Metabolic Diseases	1	Receptor	IGFALS	CURATED	3483	DTO_05007575	2007	0.846	C0920563	P35858	Pathologic Function	Insulin Sensitivity	C18	0.3	2007	0.511
phenotype	3.2764e-07		Nutritional and Metabolic Diseases	1	Enzyme	LIPC	CURATED	3990	DTO_05007624	2004	0.654	C0920563	P11150	Pathologic Function	Insulin Sensitivity	C18	0.3	2004	0.585
phenotype	0.00091697		Nutritional and Metabolic Diseases	1	G-protein coupled receptor	MC4R	CURATED	4160	DTO_02300001	2008	0.692	C0920563	P32245	Pathologic Function	Insulin Sensitivity	C18	0.3	2008	0.535
phenotype	0.030182		Nutritional and Metabolic Diseases	1	Nuclear receptor	PPARA	CURATED	5465	DTO_00102000	2011	0.885	C0920563	Q07869	Pathologic Function	Insulin Sensitivity	C18	0.3	2005	0.432
phenotype	0.15499		Nutritional and Metabolic Diseases	1	Enzyme	SOD2	CURATED	6648	DTO_05007624	2012	0.923	C0920563	P04179	Pathologic Function	Insulin Sensitivity	C18	0.3	2012	0.379
group	3.0504e-07		Pathological Conditions, Signs and Symptoms; Nervous System Diseases; Mental Disorders; Behavior and Behavior Mechanisms	1	Enzyme	ALDH5A1	CURATED	7915	DTO_05007624	2013	0.462	C3714756	P51649	Mental or Behavioral Dysfunction	Intellectual Disability	C23;C10;F03;F01	0.4	2013	0.619
group	0.0018685		Nervous System Diseases; Cardiovascular Diseases	1		APOE	CURATED	348		2008	0.962	C0750986	P02649	Disease or Syndrome	Internal Carotid Artery Diseases	C10;C14	0.3	2008	0.338
disease	0.0018685		Nervous System Diseases; Cardiovascular Diseases	1		APOE	CURATED	348		2006	0.962	C0340569	P02649	Disease or Syndrome	Internal Carotid Artery Stenosis	C10;C14	0.3	2006	0.338
disease	0.00093892		Digestive System Diseases; Neoplasms	1	Nuclear receptor	NR1H4	CURATED	9971	DTO_00102000	2013	0.808	C0346627	Q96RI1	Neoplastic Process	Intestinal Cancer	C06;C04	0.3	2013	0.513
group	0.00093892		Digestive System Diseases; Neoplasms	1	Nuclear receptor	NR1H4	CURATED	9971	DTO_00102000	2013	0.808	C0021841	Q96RI1	Neoplastic Process	Intestinal Neoplasms	C06;C04	0.3	2013	0.513
disease	0.0039011		Neoplasms; Nervous System Diseases	1		CST3	CURATED	1471		2010	0.808	C0349604	P01034	Neoplastic Process	Intracranial Meningioma	C04;C10	0.3	2010	0.436
disease	0.0039011		Neoplasms; Nervous System Diseases	1		CST3	CURATED	1471		2010	0.808	C1334261	P01034	Neoplastic Process	Intraorbital Meningioma	C04;C10	0.3	2010	0.436
disease	0.0039011		Neoplasms; Nervous System Diseases	1		CST3	CURATED	1471		2010	0.808	C1334271	P01034	Neoplastic Process	Intraventricular Meningioma	C04;C10	0.3	2010	0.436
disease	0.15499		Neoplasms; Skin and Connective Tissue Diseases	1	Enzyme	SOD2	CURATED	6648	DTO_05007624	2016	0.923	C1134719	P04179	Neoplastic Process	Invasive Ductal Breast Carcinoma	C04;C17	0.31	2014	0.379
disease	0.15499		Mental Disorders	1	Enzyme	SOD2	CURATED	6648	DTO_05007624	2011	0.923	C0011574	P04179	Mental or Behavioral Dysfunction	Involutional Depression	F03	0.3	2011	0.379
disease	0.15499		Mental Disorders	1	Enzyme	SOD2	CURATED	6648	DTO_05007624	2011	0.923	C1571983	P04179	Mental or Behavioral Dysfunction	Involutional paraphrenia	F03	0.3	2011	0.379
phenotype	0.15499		Pathological Conditions, Signs and Symptoms	1	Enzyme	SOD2	CURATED	6648	DTO_05007624	2008	0.923	C0022116	P04179	Pathologic Function	Ischemia	C23	0.3	2001	0.379
disease	0.030057			1	Signaling	GH1	CURATED	2688	DTO_05007599	2012	0.923	C4748435	P01241	Disease or Syndrome	ISOLATED GROWTH HORMONE DEFICIENCY, TYPE V		0.3	2009	0.373
disease	0.0003636		Pathological Conditions, Signs and Symptoms; Nervous System Diseases	1	Enzyme	ALPL	CURATED	249	DTO_05007624	2016	0.769	C0022333	P05186	Disease or Syndrome	Jacksonian Seizure	C23;C10	0.3	1995	0.546
disease	0.0018685		Pathological Conditions, Signs and Symptoms; Nervous System Diseases	1		APOE	CURATED	348		2013	0.962	C0022333	P02649	Disease or Syndrome	Jacksonian Seizure	C23;C10	0.3	2013	0.338
disease	0.0184		Pathological Conditions, Signs and Symptoms; Nervous System Diseases	1	Signaling	FGF2	CURATED	2247	DTO_05007599	2011	0.923	C0022333	P09038	Disease or Syndrome	Jacksonian Seizure	C23;C10	0.3	2011	0.383
disease	0.15499		Pathological Conditions, Signs and Symptoms; Nervous System Diseases	1	Enzyme	SOD2	CURATED	6648	DTO_05007624	2010	0.923	C0022333	P04179	Disease or Syndrome	Jacksonian Seizure	C23;C10	0.3	2010	0.379
disease	0.98493		Skin and Connective Tissue Diseases; Musculoskeletal Diseases; Immune System Diseases	1		RBM47	CURATED	54502		2009	0.308	C3495559	A0AV96	Disease or Syndrome	Juvenile arthritis	C17;C05;C20	0.3	2009	0.729
disease	0.00010289		Neoplasms; Hemic and Lymphatic Diseases	1		SH2B3	CURATED	10019		2015	0.692	C0349639	Q9UQQ2	Neoplastic Process	Juvenile Myelomonocytic Leukemia	C04;C15	0.3	2015	0.527
disease	0.98493		Skin and Connective Tissue Diseases; Musculoskeletal Diseases; Immune System Diseases	1		RBM47	CURATED	54502		2009	0.308	C3714758	A0AV96	Disease or Syndrome	Juvenile psoriatic arthritis	C17;C05;C20	0.3	2009	0.729
disease	0.98493		Skin and Connective Tissue Diseases; Musculoskeletal Diseases; Immune System Diseases	1		RBM47	CURATED	54502		2009	0.308	C0087031	A0AV96	Disease or Syndrome	Juvenile-Onset Still Disease	C17;C05;C20	0.3	2009	0.729
disease	0.64329		Pathological Conditions, Signs and Symptoms; Skin and Connective Tissue Diseases	1	Transporter	ALB	CURATED	213	DTO_05007405	2010	0.962	C0022548	P02768	Acquired Abnormality	Keloid	C23;C17	0.3	2010	0.317
disease	0.73709		Pathological Conditions, Signs and Symptoms; Skin and Connective Tissue Diseases	1	Nucleic acid binding	EIF5A	CURATED	1984	DTO_05007557	2010	0.692	C0022548	P63241	Acquired Abnormality	Keloid	C23;C17	0.3	2010	0.612
group	0.64329		Female Urogenital Diseases and Pregnancy Complications; Male Urogenital Diseases	0.973	Transporter	ALB	CURATED	213	DTO_05007405	2020	0.962	C0022658	P02768	Disease or Syndrome	Kidney Diseases	C13;C12	0.4	1978	0.317
group	0.0039011		Female Urogenital Diseases and Pregnancy Complications; Male Urogenital Diseases	1		CST3	CURATED	1471		2020	0.808	C0022658	P01034	Disease or Syndrome	Kidney Diseases	C13;C12	0.4	2006	0.436
group	0.0184		Female Urogenital Diseases and Pregnancy Complications; Male Urogenital Diseases	1	Signaling	FGF2	CURATED	2247	DTO_05007599	2006	0.923	C0022658	P09038	Disease or Syndrome	Kidney Diseases	C13;C12	0.33	1997	0.383
group	0.99999		Female Urogenital Diseases and Pregnancy Complications; Male Urogenital Diseases	1		LRP2	CURATED	4036		2019	0.846	C0022658	P98164	Disease or Syndrome	Kidney Diseases	C13;C12	0.33	2007	0.491
group	0.030182		Female Urogenital Diseases and Pregnancy Complications; Male Urogenital Diseases	1	Nuclear receptor	PPARA	CURATED	5465	DTO_00102000	2018	0.885	C0022658	Q07869	Disease or Syndrome	Kidney Diseases	C13;C12	0.33	2005	0.432
group	2.0202e-12		Female Urogenital Diseases and Pregnancy Complications; Male Urogenital Diseases	1	Transporter	SLC22A2	CURATED	6582	DTO_05007405	2012	0.769	C0022658	O15244	Disease or Syndrome	Kidney Diseases	C13;C12	0.3	2012	0.572
disease	0.0018685		Female Urogenital Diseases and Pregnancy Complications; Male Urogenital Diseases	1		APOE	CURATED	348		2014	0.962	C0035078	P02649	Disease or Syndrome	Kidney Failure	C13;C12	0.35	1998	0.338
disease	0.64329		Female Urogenital Diseases and Pregnancy Complications; Male Urogenital Diseases	0.983	Transporter	ALB	CURATED	213	DTO_05007405	2020	0.962	C0022660	P02768	Disease or Syndrome	Kidney Failure, Acute	C13;C12	0.4	1991	0.317
disease	0.0039011		Female Urogenital Diseases and Pregnancy Complications; Male Urogenital Diseases	1		CST3	CURATED	1471		2020	0.808	C0022660	P01034	Disease or Syndrome	Kidney Failure, Acute	C13;C12	0.4	2011	0.436
disease	1.6891e-13		Female Urogenital Diseases and Pregnancy Complications; Male Urogenital Diseases	1	Transporter	SLC22A12	CURATED	116085	DTO_05007405	2013	0.538	C0022660	Q96S37	Disease or Syndrome	Kidney Failure, Acute	C13;C12	0.35	2003	0.647
disease	0.99999		Female Urogenital Diseases and Pregnancy Complications; Male Urogenital Diseases	1		LRP2	CURATED	4036		2018	0.846	C0022660	P98164	Disease or Syndrome	Kidney Failure, Acute	C13;C12	0.32	2014	0.491
disease	0.010345		Female Urogenital Diseases and Pregnancy Complications; Male Urogenital Diseases	1	Enzyme	PLG	CURATED	5340	DTO_05007624	2017	0.923	C0022660	P00747	Disease or Syndrome	Kidney Failure, Acute	C13;C12	0.31	2017	0.389
disease	5.3634e-08		Female Urogenital Diseases and Pregnancy Complications; Male Urogenital Diseases	1		UGT1A9	CURATED	54600		2011	0.577	C0022660	O60656	Disease or Syndrome	Kidney Failure, Acute	C13;C12	0.3	2011	0.59
disease	3.2577e-06		Female Urogenital Diseases and Pregnancy Complications; Male Urogenital Diseases	1		UGT1A1	CURATED	54658		1985	0.769	C0022660	P22309	Disease or Syndrome	Kidney Failure, Acute	C13;C12	0.3	1985	0.464
disease	0.64329		Female Urogenital Diseases and Pregnancy Complications; Male Urogenital Diseases	0.919	Transporter	ALB	CURATED	213	DTO_05007405	2020	0.962	C0022661	P02768	Disease or Syndrome	Kidney Failure, Chronic	C13;C12	0.4	1997	0.317
disease	0.0036969		Female Urogenital Diseases and Pregnancy Complications; Male Urogenital Diseases	1		CRP	CURATED	1401		2019	0.962	C0022661	P02741	Disease or Syndrome	Kidney Failure, Chronic	C13;C12	0.4	1998	0.299
disease	1.4525e-13		Female Urogenital Diseases and Pregnancy Complications; Male Urogenital Diseases	1	Transporter	ABCA1	CURATED	19	DTO_05007405	2010	0.846	C0022661	O95477	Disease or Syndrome	Kidney Failure, Chronic	C13;C12	0.3	2010	0.467
disease	0.066228		Female Urogenital Diseases and Pregnancy Complications; Male Urogenital Diseases	1	Receptor	SCARB1	CURATED	949	DTO_05007575	2010	0.731	C0022661	Q8WTV0	Disease or Syndrome	Kidney Failure, Chronic	C13;C12	0.3	2010	0.559
disease	0.030182		Female Urogenital Diseases and Pregnancy Complications; Male Urogenital Diseases	1	Nuclear receptor	PPARA	CURATED	5465	DTO_00102000	2010	0.885	C0022661	Q07869	Disease or Syndrome	Kidney Failure, Chronic	C13;C12	0.32	2005	0.432
disease	0.15499		Neoplasms; Female Urogenital Diseases and Pregnancy Complications; Male Urogenital Diseases	1	Enzyme	SOD2	CURATED	6648	DTO_05007624	2014	0.923	C0022665	P04179	Neoplastic Process	Kidney Neoplasm	C04;C13;C12	0.3	2014	0.379
disease	0.5503		Neoplasms; Respiratory Tract Diseases	NA	Kinase	DDR2	CURATED	4921	DTO_03300101	NA	0.769	C0345958	Q16832	Neoplastic Process	Large cell carcinoma of lung	C04;C08	0.3	NA	0.541
disease	9.934e-07		Neoplasms; Respiratory Tract Diseases; Otorhinolaryngologic Diseases	1	Enzyme	ADH1B	CURATED	125	DTO_05007624	2008	0.846	C0023055	P00325	Neoplastic Process	Laryngeal neoplasm	C04;C08;C09	0.3	2008	0.502
disease	3.4212e-10		Pathological Conditions, Signs and Symptoms; Nervous System Diseases; Mental Disorders	1		POR	CURATED	5447		2012	0.769	C0751265	P16435	Mental or Behavioral Dysfunction	Learning Disabilities	C23;C10;F03	0.3	2012	0.502
group	3.4212e-10		Pathological Conditions, Signs and Symptoms; Nervous System Diseases; Mental Disorders	1		POR	CURATED	5447		2012	0.769	C0023186	P16435	Mental or Behavioral Dysfunction	Learning Disorders	C23;C10;F03	0.3	2012	0.502
disease	3.4212e-10		Pathological Conditions, Signs and Symptoms; Nervous System Diseases; Mental Disorders	1		POR	CURATED	5447		2012	0.769	C0751263	P16435	Mental or Behavioral Dysfunction	Learning Disturbance	C23;C10;F03	0.3	2012	0.502
phenotype	0.15499		Pathological Conditions, Signs and Symptoms; Nervous System Diseases; Cardiovascular Diseases	1	Enzyme	SOD2	CURATED	6648	DTO_05007624	2011	0.923	C0751846	P04179	Disease or Syndrome	Left Middle Cerebral Artery Infarction	C23;C10;C14	0.3	2011	0.379
disease	0.64329		Cardiovascular Diseases	1	Transporter	ALB	CURATED	213	DTO_05007405	2001	0.962	C0023212	P02768	Disease or Syndrome	Left-Sided Heart Failure	C14	0.3	2001	0.317
disease	0.031714		Cardiovascular Diseases	1		APCS	CURATED	325		2005	0.808	C0023212	P02743	Disease or Syndrome	Left-Sided Heart Failure	C14	0.3	2005	0.531
disease	0.0036969		Cardiovascular Diseases	1		CRP	CURATED	1401		2005	0.962	C0023212	P02741	Disease or Syndrome	Left-Sided Heart Failure	C14	0.3	2005	0.299
disease	0.15499		Cardiovascular Diseases	1	Enzyme	SOD2	CURATED	6648	DTO_05007624	2011	0.923	C0023212	P04179	Disease or Syndrome	Left-Sided Heart Failure	C14	0.3	2005	0.379
disease	0.0036969		Infections; Skin and Connective Tissue Diseases	1		CRP	CURATED	1401		2007	0.962	C0023281	P02741	Disease or Syndrome	Leishmaniasis	C01;C17	0.3	2007	0.299
disease	0.0036969		Infections	1		CRP	CURATED	1401		1999	0.962	C0023290	P02741	Disease or Syndrome	Leishmaniasis, Visceral	C01	0.3	1999	0.299
disease	0.65372		Neoplasms	0.947	Kinase	JAK2	CURATED	3717	DTO_03300101	2019	0.885	C0023418	O60674	Neoplastic Process	leukemia	C04	0.4	1997	0.385
disease	0.96926		Neoplasms	1		NECTIN2	CURATED	5819		2019	0.769	C0023467	Q92692	Neoplastic Process	Leukemia, Myelocytic, Acute	C04	0.32	2018	0.575
disease	0.0039011		Neoplasms	1		CST3	CURATED	1471		2007	0.808	C0023467	P01034	Neoplastic Process	Leukemia, Myelocytic, Acute	C04	0.31	2005	0.436
disease	0.00010289		Neoplasms	NA		SH2B3	CURATED	10019		NA	0.692	C0023467	Q9UQQ2	Neoplastic Process	Leukemia, Myelocytic, Acute	C04	0.3	NA	0.527
group	0.010345		Hemic and Lymphatic Diseases	1	Enzyme	PLG	CURATED	5340	DTO_05007624	2018	0.923	C0023510	P00747	Disease or Syndrome	Leukocyte Disorders	C15	0.3	2018	0.389
disease	0.15499		Nervous System Diseases; Mental Disorders	1	Enzyme	SOD2	CURATED	6648	DTO_05007624	2017	0.923	C0752347	P04179	Disease or Syndrome	Lewy Body Disease	C10;F03	0.31	2005	0.379
disease	1		Nervous System Diseases; Mental Disorders	1	Receptor	IGF2R	CURATED	3482	DTO_05007575	2009	0.731	C0752347	P11717	Disease or Syndrome	Lewy Body Disease	C10;F03	0.3	2009	0.518
disease	0.0036969		Skin and Connective Tissue Diseases; Immune System Diseases	1		CRP	CURATED	1401		2007	0.962	C0242380	P02741	Disease or Syndrome	Libman-Sacks Disease	C17;C20	0.3	2007	0.299
disease	0.45637		Skin and Connective Tissue Diseases; Immune System Diseases	NA	Cell adhesion	FCGR2B	CURATED	2213	DTO_05007620	NA	0.846	C0242380	P31994	Disease or Syndrome	Libman-Sacks Disease	C17;C20	0.3	NA	0.522
disease	0.00010289		Skin and Connective Tissue Diseases; Immune System Diseases	1		SH2B3	CURATED	10019		2009	0.692	C0242380	Q9UQQ2	Disease or Syndrome	Libman-Sacks Disease	C17;C20	0.3	2009	0.527
group	0.00054909		Nutritional and Metabolic Diseases	1		APOA1	CURATED	335		2015	0.885	C0154251	P02647	Disease or Syndrome	Lipid Metabolism Disorders	C18	0.31	1982	0.429
group	3.2764e-07		Congenital, Hereditary, and Neonatal Diseases and Abnormalities; Nutritional and Metabolic Diseases	1	Enzyme	LIPC	CURATED	3990	DTO_05007624	2004	0.654	C0023772	P11150	Disease or Syndrome	Lipid Metabolism, Inborn Errors	C16;C18	0.3	1991	0.585
group	3.081e-21		Congenital, Hereditary, and Neonatal Diseases and Abnormalities; Nutritional and Metabolic Diseases	1	Transporter	ABCG5	CURATED	64240	DTO_05007405	2001	0.577	C0023772	Q9H222	Disease or Syndrome	Lipid Metabolism, Inborn Errors	C16;C18	0.3	2001	0.592
phenotype	0.0018685		Nutritional and Metabolic Diseases	1		APOE	CURATED	348		2010	0.962	C1706412	P02649	Finding	Lipidemias	C18	0.3	2002	0.338
phenotype	1.1892e-23		Nutritional and Metabolic Diseases	1		CETP	CURATED	1071		1999	0.731	C1706412	P11597	Finding	Lipidemias	C18	0.3	1999	0.512
phenotype	9.841e-24		Nutritional and Metabolic Diseases	1		LDLR	CURATED	3949		2015	0.885	C1706412	P01130	Finding	Lipidemias	C18	0.3	2002	0.449
phenotype	3.2764e-07		Nutritional and Metabolic Diseases	1	Enzyme	LIPC	CURATED	3990	DTO_05007624	1991	0.654	C1706412	P11150	Finding	Lipidemias	C18	0.3	1991	0.585
phenotype	1.2712e-09		Nutritional and Metabolic Diseases	1	Enzyme	LPL	CURATED	4023	DTO_05007624	2008	0.808	C1706412	P06858	Finding	Lipidemias	C18	0.3	2008	0.474
phenotype	1.9234e-16		Nutritional and Metabolic Diseases	1		APOB	CURATED	338		2008	0.808	C1706412	P04114	Finding	Lipidemias	C18	0.3	2008	0.453
phenotype	0.030182		Nutritional and Metabolic Diseases	1	Nuclear receptor	PPARA	CURATED	5465	DTO_00102000	2011	0.885	C1706412	Q07869	Finding	Lipidemias	C18	0.3	2011	0.432
disease	0.00054909		Digestive System Diseases; Neoplasms	1		APOA1	CURATED	335		2019	0.885	C2239176	P02647	Neoplastic Process	Liver carcinoma	C06;C04	0.4	1991	0.429
disease	0.0036969		Digestive System Diseases; Neoplasms	0.958		CRP	CURATED	1401		2019	0.962	C2239176	P02741	Neoplastic Process	Liver carcinoma	C06;C04	0.4	1990	0.299
disease	6.5917e-89		Digestive System Diseases; Neoplasms	1	Enzyme	LPA	CURATED	4018	DTO_05007624	2019	0.769	C2239176	P08519	Neoplastic Process	Liver carcinoma	C06;C04	0.39	1996	0.444
disease	0.15499		Digestive System Diseases; Neoplasms	1	Enzyme	SOD2	CURATED	6648	DTO_05007624	2019	0.923	C2239176	P04179	Neoplastic Process	Liver carcinoma	C06;C04	0.39	2006	0.379
disease	2.0485e-07		Digestive System Diseases; Neoplasms	1		HJURP	CURATED	55355		2019	0.269	C2239176	Q8NCD3	Neoplastic Process	Liver carcinoma	C06;C04	0.33	2017	0.691
disease	0.031714		Digestive System Diseases; Neoplasms	1		APCS	CURATED	325		2009	0.808	C2239176	P02743	Neoplastic Process	Liver carcinoma	C06;C04	0.31	2008	0.531
disease	1.1892e-23		Digestive System Diseases; Neoplasms	1		CETP	CURATED	1071		2017	0.731	C2239176	P11597	Neoplastic Process	Liver carcinoma	C06;C04	0.3	2017	0.512
disease	5.4379e-11		Digestive System Diseases; Neoplasms	1	Receptor	IGFALS	CURATED	3483	DTO_05007575	2017	0.846	C2239176	P35858	Neoplastic Process	Liver carcinoma	C06;C04	0.3	2017	0.511
disease	0.08102		Digestive System Diseases; Neoplasms	1	Enzyme	LCAT	CURATED	3931	DTO_05007624	2017	0.654	C2239176	P04180	Neoplastic Process	Liver carcinoma	C06;C04	0.3	2017	0.588
disease	0.64329		Pathological Conditions, Signs and Symptoms; Digestive System Diseases	1	Transporter	ALB	CURATED	213	DTO_05007405	2020	0.962	C0023890	P02768	Disease or Syndrome	Liver Cirrhosis	C23;C06	0.4	1987	0.317
disease	3.793e-10		Pathological Conditions, Signs and Symptoms; Digestive System Diseases	1		CYP2R1	CURATED	120227		2014	0.731	C0023890	Q6VVX0	Disease or Syndrome	Liver Cirrhosis	C23;C06	0.3	2014	0.563
disease	0.15499		Pathological Conditions, Signs and Symptoms; Digestive System Diseases; Chemically-Induced Disorders	1	Enzyme	SOD2	CURATED	6648	DTO_05007624	2016	0.923	C0023891	P04179	Disease or Syndrome	Liver Cirrhosis, Alcoholic	C23;C06;C25	0.32	2009	0.379
disease	0.64329		Pathological Conditions, Signs and Symptoms; Digestive System Diseases	1	Transporter	ALB	CURATED	213	DTO_05007405	2010	0.962	C0023893	P02768	Experimental Model of Disease	Liver Cirrhosis, Experimental	C23;C06	0.3	2006	0.317
disease	0.0184		Pathological Conditions, Signs and Symptoms; Digestive System Diseases	1	Signaling	FGF2	CURATED	2247	DTO_05007599	2005	0.923	C0023893	P09038	Experimental Model of Disease	Liver Cirrhosis, Experimental	C23;C06	0.3	2005	0.383
disease	0.81452		Pathological Conditions, Signs and Symptoms; Digestive System Diseases	1	Enzyme	FKBP1A	CURATED	2280	DTO_05007624	2014	0.654	C0023893	P62942	Experimental Model of Disease	Liver Cirrhosis, Experimental	C23;C06	0.3	2014	0.641
disease	0.63464		Pathological Conditions, Signs and Symptoms; Digestive System Diseases	1	Kinase	GCK	CURATED	2645	DTO_03300101	2006	0.808	C0023893	P35557	Experimental Model of Disease	Liver Cirrhosis, Experimental	C23;C06	0.3	2006	0.523
disease	0.030057		Pathological Conditions, Signs and Symptoms; Digestive System Diseases	1	Signaling	GH1	CURATED	2688	DTO_05007599	2004	0.923	C0023893	P01241	Experimental Model of Disease	Liver Cirrhosis, Experimental	C23;C06	0.3	2004	0.373
disease	0.0011573		Pathological Conditions, Signs and Symptoms; Digestive System Diseases	1		GOT1	CURATED	2805		2006	0.692	C0023893	P17174	Experimental Model of Disease	Liver Cirrhosis, Experimental	C23;C06	0.3	2006	0.601
disease	2.4971e-23		Pathological Conditions, Signs and Symptoms; Digestive System Diseases	1		HAL	CURATED	3034		2014	0.538	C0023893	P42357	Experimental Model of Disease	Liver Cirrhosis, Experimental	C23;C06	0.3	2014	0.641
disease	1		Pathological Conditions, Signs and Symptoms; Digestive System Diseases	1	Receptor	IGF2R	CURATED	3482	DTO_05007575	2014	0.731	C0023893	P11717	Experimental Model of Disease	Liver Cirrhosis, Experimental	C23;C06	0.3	2014	0.518
disease	5.4379e-11		Pathological Conditions, Signs and Symptoms; Digestive System Diseases	1	Receptor	IGFALS	CURATED	3483	DTO_05007575	2014	0.846	C0023893	P35858	Experimental Model of Disease	Liver Cirrhosis, Experimental	C23;C06	0.3	2014	0.511
disease	0.91029		Pathological Conditions, Signs and Symptoms; Digestive System Diseases	1	Enzyme modulator	IGFBP3	CURATED	3486	DTO_05007584	2014	0.808	C0023893	P17936	Experimental Model of Disease	Liver Cirrhosis, Experimental	C23;C06	0.3	2014	0.439
disease	1.2712e-09		Pathological Conditions, Signs and Symptoms; Digestive System Diseases	1	Enzyme	LPL	CURATED	4023	DTO_05007624	2014	0.808	C0023893	P06858	Experimental Model of Disease	Liver Cirrhosis, Experimental	C23;C06	0.3	2014	0.474
disease	0.010345		Pathological Conditions, Signs and Symptoms; Digestive System Diseases	1	Enzyme	PLG	CURATED	5340	DTO_05007624	2004	0.923	C0023893	P00747	Experimental Model of Disease	Liver Cirrhosis, Experimental	C23;C06	0.3	2004	0.389
disease	0.96926		Pathological Conditions, Signs and Symptoms; Digestive System Diseases	1		NECTIN2	CURATED	5819		2014	0.769	C0023893	Q92692	Experimental Model of Disease	Liver Cirrhosis, Experimental	C23;C06	0.3	2014	0.575
disease	0.17989		Pathological Conditions, Signs and Symptoms; Digestive System Diseases	1	Cellular structure	EZR	CURATED	7430	DTO_05007530	2014	0.808	C0023893	P15311	Experimental Model of Disease	Liver Cirrhosis, Experimental	C23;C06	0.3	2014	0.476
disease	1.6455e-13		Pathological Conditions, Signs and Symptoms; Digestive System Diseases	1	Signaling	ANGPTL3	CURATED	27329	DTO_05007599	2014	0.577	C0023893	Q9Y5C1	Experimental Model of Disease	Liver Cirrhosis, Experimental	C23;C06	0.3	2014	0.584
disease	3.081e-21		Pathological Conditions, Signs and Symptoms; Digestive System Diseases	1	Transporter	ABCG5	CURATED	64240	DTO_05007405	2014	0.577	C0023893	Q9H222	Experimental Model of Disease	Liver Cirrhosis, Experimental	C23;C06	0.3	2014	0.592
disease	1.1608e-12		Pathological Conditions, Signs and Symptoms; Digestive System Diseases	1		TMEM43	CURATED	79188		2014	0.462	C0023893	Q9BTV4	Experimental Model of Disease	Liver Cirrhosis, Experimental	C23;C06	0.3	2014	0.653
disease	0.00037886		Pathological Conditions, Signs and Symptoms; Digestive System Diseases	1		PLA2G12A	CURATED	81579		2014	0.192	C0023893	Q9BZM1	Experimental Model of Disease	Liver Cirrhosis, Experimental	C23;C06	0.3	2014	0.805
group	3.5945e-19		Digestive System Diseases	0.985	Enzyme	GPT	CURATED	2875	DTO_05007624	2020	0.923	C0023895	P24298	Disease or Syndrome	Liver diseases	C06	0.4	1993	0.403
group	0.0003636		Digestive System Diseases	1	Enzyme	ALPL	CURATED	249	DTO_05007624	2010	0.769	C0023895	P05186	Disease or Syndrome	Liver diseases	C06	0.31	2007	0.546
group	7.8157e-09		Digestive System Diseases	1	Immune response	CRISPLD2	CURATED	83716	DTO_05007608	2020	0.769	C0023895	Q9H0B8	Disease or Syndrome	Liver diseases	C06	0.31	2010	0.585
phenotype	0.0003636		Digestive System Diseases	1	Enzyme	ALPL	CURATED	249	DTO_05007624	2010	0.769	C0086565	P05186	Finding	Liver Dysfunction	C06	0.3	2010	0.546
phenotype	7.5307e-05		Digestive System Diseases	1	Enzyme	GGT1	CURATED	2678	DTO_05007624	2010	0.885	C0086565	P19440	Finding	Liver Dysfunction	C06	0.3	2010	0.496
phenotype	3.5945e-19		Digestive System Diseases	1	Enzyme	GPT	CURATED	2875	DTO_05007624	2014	0.923	C0086565	P24298	Finding	Liver Dysfunction	C06	0.3	2014	0.403
phenotype	0.00093892		Digestive System Diseases	1	Nuclear receptor	NR1H4	CURATED	9971	DTO_00102000	2011	0.808	C0086565	Q96RI1	Finding	Liver Dysfunction	C06	0.3	2011	0.513
phenotype	7.8157e-09		Digestive System Diseases	1	Immune response	CRISPLD2	CURATED	83716	DTO_05007608	2010	0.769	C0086565	Q9H0B8	Finding	Liver Dysfunction	C06	0.3	2010	0.585
group	0.031714		Digestive System Diseases; Neoplasms	1		APCS	CURATED	325		2010	0.808	C0023903	P02743	Neoplastic Process	Liver neoplasms	C06;C04	0.3	2010	0.531
phenotype	0.65372		Digestive System Diseases; Neoplasms	1	Kinase	JAK2	CURATED	3717	DTO_03300101	2017	0.885	C0023904	O60674	Neoplastic Process; Experimental Model of Disease	Liver Neoplasms, Experimental	C06;C04	0.3	2017	0.385
group	0.15499		Respiratory Tract Diseases	1	Enzyme	SOD2	CURATED	6648	DTO_05007624	2002	0.923	C0024115	P04179	Disease or Syndrome	Lung diseases	C08	0.32	1992	0.379
group	3.0761e-06		Respiratory Tract Diseases	1	G-protein coupled receptor	ADGRE5	CURATED	976	DTO_02300001	2011	0.538	C0024115	P48960	Disease or Syndrome	Lung diseases	C08	0.3	2011	0.601
group	1		Respiratory Tract Diseases	1	Receptor	IGF2R	CURATED	3482	DTO_05007575	2011	0.731	C0024115	P11717	Disease or Syndrome	Lung diseases	C08	0.3	2010	0.518
group	7.8157e-09		Respiratory Tract Diseases	1	Immune response	CRISPLD2	CURATED	83716	DTO_05007608	2011	0.769	C0024115	Q9H0B8	Disease or Syndrome	Lung diseases	C08	0.3	2011	0.585
group	0.15499		Respiratory Tract Diseases	1	Enzyme	SOD2	CURATED	6648	DTO_05007624	2000	0.923	C0206062	P04179	Disease or Syndrome	Lung Diseases, Interstitial	C08	0.3	2000	0.379
disease	0.64329		Respiratory Tract Diseases; Wounds and Injuries	1	Transporter	ALB	CURATED	213	DTO_05007405	2019	0.962	C0273115	P02768	Injury or Poisoning	Lung Injury	C08;C26	0.3	2019	0.317
group	0.0018685		Neoplasms; Respiratory Tract Diseases	1		APOE	CURATED	348		2019	0.962	C0024121	P02649	Neoplastic Process	Lung Neoplasms	C04;C08	0.32	2008	0.338
group	0.00054909		Neoplasms; Respiratory Tract Diseases	1		APOA1	CURATED	335		2009	0.885	C0024121	P02647	Neoplastic Process	Lung Neoplasms	C04;C08	0.31	2008	0.429
group	0.0036969		Neoplasms; Respiratory Tract Diseases	1		CRP	CURATED	1401		2006	0.962	C0024121	P02741	Neoplastic Process	Lung Neoplasms	C04;C08	0.31	2006	0.299
group	0.010024		Neoplasms; Respiratory Tract Diseases	1		APOC3	CURATED	345		2009	0.731	C0024121	P02656	Neoplastic Process	Lung Neoplasms	C04;C08	0.3	2009	0.531
group	5.321e-24		Neoplasms; Respiratory Tract Diseases	1	Transporter	SLCO1B3	CURATED	28234	DTO_05007405	2014	0.769	C0024121	Q9NPD5	Neoplastic Process	Lung Neoplasms	C04;C08	0.3	2012	0.592
disease	0.0036969		Skin and Connective Tissue Diseases; Immune System Diseases	0.923		CRP	CURATED	1401		2020	0.962	C0024141	P02741	Disease or Syndrome	Lupus Erythematosus, Systemic	C17;C20	0.4	1987	0.299
disease	0.00010289		Skin and Connective Tissue Diseases; Immune System Diseases	1		SH2B3	CURATED	10019		2009	0.692	C0024141	Q9UQQ2	Disease or Syndrome	Lupus Erythematosus, Systemic	C17;C20	0.3	2009	0.527
disease	1.2538e-06		Pathological Conditions, Signs and Symptoms; Neoplasms	1		SHBG	CURATED	6462		2013	0.808	C0024232	P04278	Neoplastic Process	Lymphatic Metastasis	C23;C04	0.3	2013	0.438
disease	0.15499		Pathological Conditions, Signs and Symptoms; Neoplasms	1	Enzyme	SOD2	CURATED	6648	DTO_05007624	2010	0.923	C0024232	P04179	Neoplastic Process	Lymphatic Metastasis	C23;C04	0.3	2000	0.379
disease	3.2577e-06		Neoplasms; Immune System Diseases; Hemic and Lymphatic Diseases	1		UGT1A1	CURATED	54658		2009	0.769	C1266194	P22309	Neoplastic Process	Lymphocyte Rich Classical Hodgkin Lymphoma	C04;C20;C15	0.3	2009	0.464
disease	1.6432e-05		Neoplasms; Immune System Diseases; Hemic and Lymphatic Diseases	NA	Kinase	FGFR3	CURATED	2261	DTO_03300101	NA	0.846	C0079773	P22607	Neoplastic Process	Lymphoma, T-Cell, Cutaneous	C04;C20;C15	0.3	NA	0.391
disease	3.081e-21		Congenital, Hereditary, and Neonatal Diseases and Abnormalities; Digestive System Diseases; Nutritional and Metabolic Diseases	1	Transporter	ABCG5	CURATED	64240	DTO_05007405	2001	0.577	C2749759	Q9H222	Disease or Syndrome	Macrothrombocytopenia-Stomatocytosis, Mediterranean	C16;C06;C18	0.3	2000	0.592
disease	0.0018685		Eye Diseases	NA		APOE	CURATED	348		NA	0.962	C1864205	P02649	Disease or Syndrome	Macular Degeneration, Age-Related, 1	C11	0.3	NA	0.338
disease	0.0036969		Mental Disorders	1		CRP	CURATED	1401		2020	0.962	C1269683	P02741	Mental or Behavioral Dysfunction	Major Depressive Disorder	F03	0.4	2012	0.299
disease	0.15499		Mental Disorders	0.75	Enzyme	SOD2	CURATED	6648	DTO_05007624	2014	0.923	C1269683	P04179	Mental or Behavioral Dysfunction	Major Depressive Disorder	F03	0.33	2006	0.379
disease	0.010345		Mental Disorders	1	Enzyme	PLG	CURATED	5340	DTO_05007624	2008	0.923	C1269683	P00747	Mental or Behavioral Dysfunction	Major Depressive Disorder	F03	0.31	2008	0.389
disease	0.0036969		Infections	0.905		CRP	CURATED	1401		2020	0.962	C0024530	P02741	Disease or Syndrome	Malaria	C01	0.4	1996	0.299
phenotype	0.15499		Male Urogenital Diseases	1	Enzyme	SOD2	CURATED	6648	DTO_05007624	2012	0.923	C0021364	P04179	Disease or Syndrome	Male infertility	C12	0.31	2012	0.379
phenotype	0.00093892		Male Urogenital Diseases	1	Nuclear receptor	NR1H4	CURATED	9971	DTO_00102000	2018	0.808	C0021364	Q96RI1	Disease or Syndrome	Male infertility	C12	0.3	2018	0.513
phenotype	0.15499		Male Urogenital Diseases	1	Enzyme	SOD2	CURATED	6648	DTO_05007624	2012	0.923	C0917731	P04179	Finding	Male sterility	C12	0.3	2012	0.379
phenotype	0.00093892		Male Urogenital Diseases	1	Nuclear receptor	NR1H4	CURATED	9971	DTO_00102000	2018	0.808	C0917731	Q96RI1	Finding	Male sterility	C12	0.3	2018	0.513
disease	0.0039011		Neoplasms; Nervous System Diseases	1		CST3	CURATED	1471		2010	0.808	C0259785	P01034	Neoplastic Process	Malignant Meningioma	C04;C10	0.3	2010	0.436
disease	0.00054909		Neoplasms; Respiratory Tract Diseases	1		APOA1	CURATED	335		2012	0.885	C0345967	P02647	Neoplastic Process	Malignant mesothelioma	C04;C08	0.3	2012	0.429
disease	0.15499		Neoplasms; Respiratory Tract Diseases	1	Enzyme	SOD2	CURATED	6648	DTO_05007624	2011	0.923	C0345967	P04179	Neoplastic Process	Malignant mesothelioma	C04;C08	0.3	2011	0.379
disease	0.15499		Neoplasms; Nervous System Diseases	1	Enzyme	SOD2	CURATED	6648	DTO_05007624	2011	0.923	C0153633	P04179	Neoplastic Process	Malignant neoplasm of brain	C04;C10	0.3	2011	0.379
disease	0.15499		Neoplasms; Skin and Connective Tissue Diseases	0.896	Enzyme	SOD2	CURATED	6648	DTO_05007624	2019	0.923	C0006142	P04179	Neoplastic Process	Malignant neoplasm of breast	C04;C17	0.4	1995	0.379
disease	0.26588		Neoplasms; Skin and Connective Tissue Diseases	1	Signaling	STC2	CURATED	8614	DTO_05007599	2019	0.692	C0006142	O76061	Neoplastic Process	Malignant neoplasm of breast	C04;C17	0.35	2002	0.573
disease	0.031714		Neoplasms; Skin and Connective Tissue Diseases	1		APCS	CURATED	325		2017	0.808	C0006142	P02743	Neoplastic Process	Malignant neoplasm of breast	C04;C17	0.33	2014	0.531
disease	1.1586e-09		Neoplasms; Skin and Connective Tissue Diseases	1		PDZK1	CURATED	5174		2015	0.654	C0006142	Q5T2W1	Neoplastic Process	Malignant neoplasm of breast	C04;C17	0.31	2000	0.65
disease	8.5042e-14		Neoplasms; Skin and Connective Tissue Diseases	1	Enzyme	SYNJ2	CURATED	8871	DTO_05007624	2015	0.577	C0006142	O15056	Neoplastic Process	Malignant neoplasm of breast	C04;C17	0.31	2005	0.691
disease	1		Neoplasms; Skin and Connective Tissue Diseases	1	Kinase	SIK3	CURATED	23387	DTO_03300101	2017	0.654	C0006142	Q9Y2K2	Neoplastic Process	Malignant neoplasm of breast	C04;C17	0.31	2017	0.631
disease	0.96926		Neoplasms; Skin and Connective Tissue Diseases	1		NECTIN2	CURATED	5819		2013	0.769	C0006142	Q92692	Neoplastic Process	Malignant neoplasm of breast	C04;C17	0.3	2013	0.575
disease	0.43077		Neoplasms; Skin and Connective Tissue Diseases	NA	Nucleic acid binding	CLASRP	CURATED	11129	DTO_05007557	NA	0.154	C0006142	Q8N2M8	Neoplastic Process	Malignant neoplasm of breast	C04;C17	0.3	NA	0.931
disease	5.3634e-08		Neoplasms; Skin and Connective Tissue Diseases	NA		UGT1A9	CURATED	54600		NA	0.577	C0006142	O60656	Neoplastic Process	Malignant neoplasm of breast	C04;C17	0.3	NA	0.59
disease	3.9682e-22		Neoplasms; Skin and Connective Tissue Diseases	1		CTU2	CURATED	348180		2016	0.423	C0006142	Q2VPK5	Neoplastic Process	Malignant neoplasm of breast	C04;C17	0.3	2016	0.695
disease	0.15499		Digestive System Diseases; Neoplasms	1	Enzyme	SOD2	CURATED	6648	DTO_05007624	2011	0.923	C0546837	P04179	Neoplastic Process	Malignant neoplasm of esophagus	C06;C04	0.32	2000	0.379
disease	7.2668e-09		Digestive System Diseases; Neoplasms	1	Nuclear receptor	NR1I2	CURATED	8856	DTO_00102000	2016	0.846	C0546837	O75469	Neoplastic Process	Malignant neoplasm of esophagus	C06;C04	0.31	2011	0.418
disease	0.15499		Neoplasms; Female Urogenital Diseases and Pregnancy Complications; Male Urogenital Diseases	1	Enzyme	SOD2	CURATED	6648	DTO_05007624	2018	0.923	C0740457	P04179	Neoplastic Process	Malignant neoplasm of kidney	C04;C13;C12	0.31	2014	0.379
disease	9.934e-07		Neoplasms; Respiratory Tract Diseases; Otorhinolaryngologic Diseases	1	Enzyme	ADH1B	CURATED	125	DTO_05007624	2016	0.846	C0007107	P00325	Neoplastic Process	Malignant neoplasm of larynx	C04;C08;C09	0.33	2003	0.502
disease	0.031714		Digestive System Diseases; Neoplasms	1		APCS	CURATED	325		2010	0.808	C0345904	P02743	Neoplastic Process	Malignant neoplasm of liver	C06;C04	0.3	2010	0.531
disease	0.0036969		Neoplasms; Respiratory Tract Diseases	0.964		CRP	CURATED	1401		2020	0.962	C0242379	P02741	Neoplastic Process	Malignant neoplasm of lung	C04;C08	0.4	2006	0.299
disease	0.0018685		Neoplasms; Respiratory Tract Diseases	0.833		APOE	CURATED	348		2019	0.962	C0242379	P02649	Neoplastic Process	Malignant neoplasm of lung	C04;C08	0.35	2008	0.338
disease	0.00054909		Neoplasms; Respiratory Tract Diseases	1		APOA1	CURATED	335		2018	0.885	C0242379	P02647	Neoplastic Process	Malignant neoplasm of lung	C04;C08	0.31	2009	0.429
disease	0.010024		Neoplasms; Respiratory Tract Diseases	1		APOC3	CURATED	345		2009	0.731	C0242379	P02656	Neoplastic Process	Malignant neoplasm of lung	C04;C08	0.31	1999	0.531
disease	5.321e-24		Neoplasms; Respiratory Tract Diseases	1	Transporter	SLCO1B3	CURATED	28234	DTO_05007405	2014	0.769	C0242379	Q9NPD5	Neoplastic Process	Malignant neoplasm of lung	C04;C08	0.31	2012	0.592
group	9.934e-07		Neoplasms; Stomatognathic Diseases	1	Enzyme	ADH1B	CURATED	125	DTO_05007624	2016	0.846	C0153381	P00325	Neoplastic Process	Malignant neoplasm of mouth	C04;C07	0.4	2008	0.502
group	0.15499		Neoplasms; Stomatognathic Diseases	1	Enzyme	SOD2	CURATED	6648	DTO_05007624	2004	0.923	C0153381	P04179	Neoplastic Process	Malignant neoplasm of mouth	C04;C07	0.31	1997	0.379
disease	0.96926		Neoplasms; Female Urogenital Diseases and Pregnancy Complications; Endocrine System Diseases	1		NECTIN2	CURATED	5819		2019	0.769	C1140680	Q92692	Neoplastic Process	Malignant neoplasm of ovary	C04;C13;C19	0.32	2013	0.575
disease	0.15499		Neoplasms; Female Urogenital Diseases and Pregnancy Complications; Endocrine System Diseases	1	Enzyme	SOD2	CURATED	6648	DTO_05007624	2008	0.923	C1140680	P04179	Neoplastic Process	Malignant neoplasm of ovary	C04;C13;C19	0.32	2005	0.379
disease	0.15499		Digestive System Diseases; Neoplasms; Endocrine System Diseases	1	Enzyme	SOD2	CURATED	6648	DTO_05007624	2015	0.923	C0346647	P04179	Neoplastic Process	Malignant neoplasm of pancreas	C06;C04;C19	0.37	2003	0.379
disease	9.934e-07		Neoplasms; Stomatognathic Diseases; Otorhinolaryngologic Diseases	0.5	Enzyme	ADH1B	CURATED	125	DTO_05007624	2008	0.846	C0153405	P00325	Neoplastic Process	Malignant neoplasm of pharynx	C04;C07;C09	0.31	2001	0.502
disease	0.0184		Neoplasms; Male Urogenital Diseases	0.9	Signaling	FGF2	CURATED	2247	DTO_05007599	2018	0.923	C0376358	P09038	Neoplastic Process	Malignant neoplasm of prostate	C04;C12	0.4	1988	0.383
disease	0.91029		Neoplasms; Male Urogenital Diseases	0.943	Enzyme modulator	IGFBP3	CURATED	3486	DTO_05007584	2018	0.808	C0376358	P17936	Neoplastic Process	Malignant neoplasm of prostate	C04;C12	0.4	1996	0.439
disease	1.2538e-06		Neoplasms; Male Urogenital Diseases	1		SHBG	CURATED	6462		2018	0.808	C0376358	P04278	Neoplastic Process	Malignant neoplasm of prostate	C04;C12	0.4	2005	0.438
disease	0.15499		Neoplasms; Male Urogenital Diseases	0.926	Enzyme	SOD2	CURATED	6648	DTO_05007624	2016	0.923	C0376358	P04179	Neoplastic Process	Malignant neoplasm of prostate	C04;C12	0.4	2003	0.379
disease	0.65372		Neoplasms; Male Urogenital Diseases	1	Kinase	JAK2	CURATED	3717	DTO_03300101	2018	0.885	C0376358	O60674	Neoplastic Process	Malignant neoplasm of prostate	C04;C12	0.39	2004	0.385
disease	1		Neoplasms; Male Urogenital Diseases	1	Receptor	IGF2R	CURATED	3482	DTO_05007575	2019	0.731	C0376358	P11717	Neoplastic Process	Malignant neoplasm of prostate	C04;C12	0.33	2003	0.518
disease	7.5307e-05		Neoplasms; Male Urogenital Diseases	1	Enzyme	GGT1	CURATED	2678	DTO_05007624	2019	0.885	C0376358	P19440	Neoplastic Process	Malignant neoplasm of prostate	C04;C12	0.32	2007	0.496
disease	0.99998		Neoplasms; Male Urogenital Diseases	1	Kinase	JAK1	CURATED	3716	DTO_03300101	2018	0.769	C0376358	P23458	Neoplastic Process	Malignant neoplasm of prostate	C04;C12	0.32	2004	0.474
disease	0.99999		Neoplasms; Male Urogenital Diseases	1		LRP2	CURATED	4036		2019	0.846	C0376358	P98164	Neoplastic Process	Malignant neoplasm of prostate	C04;C12	0.32	2008	0.491
disease	0.96926		Neoplasms; Male Urogenital Diseases	1		NECTIN2	CURATED	5819		2019	0.769	C0376358	Q92692	Neoplastic Process	Malignant neoplasm of prostate	C04;C12	0.31	2019	0.575
disease	3.081e-21		Neoplasms; Male Urogenital Diseases	1	Transporter	ABCG5	CURATED	64240	DTO_05007405	2015	0.577	C0376358	Q9H222	Neoplastic Process	Malignant neoplasm of prostate	C04;C12	0.31	2012	0.592
disease	1.006e-05		Neoplasms; Male Urogenital Diseases	1		NPR3	CURATED	4883		2009	0.615	C0376358	P17342	Neoplastic Process	Malignant neoplasm of prostate	C04;C12	0.3	2009	0.633
disease	1.1586e-09		Neoplasms; Male Urogenital Diseases	1		PDZK1	CURATED	5174		2007	0.654	C0376358	Q5T2W1	Neoplastic Process	Malignant neoplasm of prostate	C04;C12	0.3	2007	0.65
disease	0.030182		Neoplasms; Male Urogenital Diseases	1	Nuclear receptor	PPARA	CURATED	5465	DTO_00102000	2020	0.885	C0376358	Q07869	Neoplastic Process	Malignant neoplasm of prostate	C04;C12	0.36	2000	0.432
disease	1.1586e-09		Neoplasms; Stomatognathic Diseases	1		PDZK1	CURATED	5174		2006	0.654	C0220636	Q5T2W1	Neoplastic Process	Malignant neoplasm of salivary gland	C04;C07	0.3	2006	0.65
disease	0.15499		Neoplasms; Skin and Connective Tissue Diseases	1	Enzyme	SOD2	CURATED	6648	DTO_05007624	2015	0.923	C0007114	P04179	Neoplastic Process	Malignant neoplasm of skin	C04;C17	0.31	2001	0.379
disease	0.64329		Digestive System Diseases; Neoplasms	1	Transporter	ALB	CURATED	213	DTO_05007405	2019	0.962	C0024623	P02768	Neoplastic Process	Malignant neoplasm of stomach	C06;C04	0.4	2003	0.317
disease	0.91029		Digestive System Diseases; Neoplasms	1	Enzyme modulator	IGFBP3	CURATED	3486	DTO_05007584	2017	0.808	C0024623	P17936	Neoplastic Process	Malignant neoplasm of stomach	C06;C04	0.37	2004	0.439
disease	0.15499		Digestive System Diseases; Neoplasms	1	Enzyme	SOD2	CURATED	6648	DTO_05007624	2020	0.923	C0024623	P04179	Neoplastic Process	Malignant neoplasm of stomach	C06;C04	0.36	2000	0.379
disease	0.00054909		Digestive System Diseases; Neoplasms	1		APOA1	CURATED	335		2009	0.885	C0024623	P02647	Neoplastic Process	Malignant neoplasm of stomach	C06;C04	0.3	2004	0.429
disease	0.15499		Neoplasms; Stomatognathic Diseases	1	Enzyme	SOD2	CURATED	6648	DTO_05007624	2010	0.923	C0153349	P04179	Neoplastic Process	Malignant neoplasm of tongue	C04;C07	0.3	2010	0.379
disease	0.15499		Neoplasms; Female Urogenital Diseases and Pregnancy Complications; Male Urogenital Diseases	1	Enzyme	SOD2	CURATED	6648	DTO_05007624	2017	0.923	C0005684	P04179	Neoplastic Process	Malignant neoplasm of urinary bladder	C04;C13;C12	0.4	2004	0.379
disease	0.91029		Neoplasms; Female Urogenital Diseases and Pregnancy Complications; Male Urogenital Diseases	1	Enzyme modulator	IGFBP3	CURATED	3486	DTO_05007584	2012	0.808	C0005684	P17936	Neoplastic Process	Malignant neoplasm of urinary bladder	C04;C13;C12	0.32	2011	0.439
disease	3.4212e-10		Neoplasms; Female Urogenital Diseases and Pregnancy Complications; Male Urogenital Diseases	1		POR	CURATED	5447		2018	0.769	C0005684	P16435	Neoplastic Process	Malignant neoplasm of urinary bladder	C04;C13;C12	0.31	1996	0.502
disease	0.96926		Neoplasms; Female Urogenital Diseases and Pregnancy Complications; Male Urogenital Diseases	1		NECTIN2	CURATED	5819		2018	0.769	C0005684	Q92692	Neoplastic Process	Malignant neoplasm of urinary bladder	C04;C13;C12	0.3	2018	0.575
group	0.15499		Neoplasms	0.976	Enzyme	SOD2	CURATED	6648	DTO_05007624	2020	0.923	C0006826	P04179	Neoplastic Process	Malignant Neoplasms	C04	0.4	1997	0.379
group	3.2577e-06		Neoplasms	1		UGT1A1	CURATED	54658		2019	0.769	C0006826	P22309	Neoplastic Process	Malignant Neoplasms	C04	0.4	2000	0.464
group	0.030182		Neoplasms	0.947	Nuclear receptor	PPARA	CURATED	5465	DTO_00102000	2020	0.885	C0006826	Q07869	Neoplastic Process	Malignant Neoplasms	C04	0.4	2003	0.432
disease	0.15499		Digestive System Diseases; Neoplasms	1	Enzyme	SOD2	CURATED	6648	DTO_05007624	2018	0.923	C0007102	P04179	Neoplastic Process	Malignant tumor of colon	C06;C04	0.32	2014	0.379
disease	1.4614e-22		Digestive System Diseases; Neoplasms	1	Transporter	SLC22A1	CURATED	6580	DTO_05007405	2019	0.731	C0007102	O15245	Neoplastic Process	Malignant tumor of colon	C06;C04	0.31	2004	0.556
disease	5.321e-24		Digestive System Diseases; Neoplasms	1	Transporter	SLCO1B3	CURATED	28234	DTO_05007405	2014	0.769	C0007102	Q9NPD5	Neoplastic Process	Malignant tumor of colon	C06;C04	0.31	2008	0.592
disease	1.2712e-09		Digestive System Diseases; Neoplasms	1	Enzyme	LPL	CURATED	4023	DTO_05007624	2004	0.808	C0007102	P06858	Neoplastic Process	Malignant tumor of colon	C06;C04	0.3	2004	0.474
disease	0.066228		Neoplasms; Animal Diseases	1	Receptor	SCARB1	CURATED	949	DTO_05007575	2002	0.731	C1257925	Q8WTV0	Neoplastic Process	Mammary Carcinoma, Animal	C04;C22	0.3	2002	0.559
disease	0.73709		Neoplasms; Animal Diseases	1	Nucleic acid binding	EIF5A	CURATED	1984	DTO_05007557	2005	0.692	C1257925	P63241	Neoplastic Process	Mammary Carcinoma, Animal	C04;C22	0.3	2005	0.612
disease	7.5307e-05		Neoplasms; Animal Diseases	1	Enzyme	GGT1	CURATED	2678	DTO_05007624	2002	0.885	C1257925	P19440	Neoplastic Process	Mammary Carcinoma, Animal	C04;C22	0.3	2002	0.496
disease	1.2712e-09		Neoplasms; Animal Diseases	1	Enzyme	LPL	CURATED	4023	DTO_05007624	2002	0.808	C1257925	P06858	Neoplastic Process	Mammary Carcinoma, Animal	C04;C22	0.3	2002	0.474
disease	0.030182		Neoplasms; Animal Diseases	1	Nuclear receptor	PPARA	CURATED	5465	DTO_00102000	2000	0.885	C1257925	Q07869	Neoplastic Process	Mammary Carcinoma, Animal	C04;C22	0.3	2000	0.432
disease	0.17989		Neoplasms; Animal Diseases	1	Cellular structure	EZR	CURATED	7430	DTO_05007530	2002	0.808	C1257925	P15311	Neoplastic Process	Mammary Carcinoma, Animal	C04;C22	0.3	2002	0.476
disease	1.1586e-09		Neoplasms; Skin and Connective Tissue Diseases	1		PDZK1	CURATED	5174		2015	0.654	C4704874	Q5T2W1	Neoplastic Process	Mammary Carcinoma, Human	C04;C17	0.3	2015	0.65
disease	0.96926		Neoplasms; Skin and Connective Tissue Diseases	1		NECTIN2	CURATED	5819		2013	0.769	C4704874	Q92692	Neoplastic Process	Mammary Carcinoma, Human	C04;C17	0.3	2013	0.575
disease	0.15499		Neoplasms; Skin and Connective Tissue Diseases	1	Enzyme	SOD2	CURATED	6648	DTO_05007624	2010	0.923	C4704874	P04179	Neoplastic Process	Mammary Carcinoma, Human	C04;C17	0.3	2008	0.379
disease	0.26588		Neoplasms; Skin and Connective Tissue Diseases	1	Signaling	STC2	CURATED	8614	DTO_05007599	2008	0.692	C4704874	O76061	Neoplastic Process	Mammary Carcinoma, Human	C04;C17	0.3	2008	0.573
disease	8.5042e-14		Neoplasms; Skin and Connective Tissue Diseases	1	Enzyme	SYNJ2	CURATED	8871	DTO_05007624	2005	0.577	C4704874	O15056	Neoplastic Process	Mammary Carcinoma, Human	C04;C17	0.3	2005	0.691
disease	1.1086e-21		Neoplasms; Skin and Connective Tissue Diseases	1	Transporter	SLCO1B1	CURATED	10599	DTO_05007405	2011	0.731	C4704874	Q9Y6L6	Neoplastic Process	Mammary Carcinoma, Human	C04;C17	0.3	2011	0.538
disease	3.9682e-22		Neoplasms; Skin and Connective Tissue Diseases	1		CTU2	CURATED	348180		2016	0.423	C4704874	Q2VPK5	Neoplastic Process	Mammary Carcinoma, Human	C04;C17	0.3	2016	0.695
disease	0.15499		Neoplasms; Skin and Connective Tissue Diseases	1	Enzyme	SOD2	CURATED	6648	DTO_05007624	2014	0.923	C0021367	P04179	Neoplastic Process	Mammary Ductal Carcinoma	C04;C17	0.3	2014	0.379
group	0.15499		Neoplasms; Skin and Connective Tissue Diseases	1	Enzyme	SOD2	CURATED	6648	DTO_05007624	2010	0.923	C1458155	P04179	Neoplastic Process	Mammary Neoplasms	C04;C17	0.4	2004	0.379
group	1.1586e-09		Neoplasms; Skin and Connective Tissue Diseases	1		PDZK1	CURATED	5174		2017	0.654	C1458155	Q5T2W1	Neoplastic Process	Mammary Neoplasms	C04;C17	0.31	2015	0.65
group	8.5042e-14		Neoplasms; Skin and Connective Tissue Diseases	1	Enzyme	SYNJ2	CURATED	8871	DTO_05007624	2015	0.577	C1458155	O15056	Neoplastic Process	Mammary Neoplasms	C04;C17	0.31	2005	0.691
group	0.96926		Neoplasms; Skin and Connective Tissue Diseases	1		NECTIN2	CURATED	5819		2013	0.769	C1458155	Q92692	Neoplastic Process	Mammary Neoplasms	C04;C17	0.3	2013	0.575
group	1.1086e-21		Neoplasms; Skin and Connective Tissue Diseases	1	Transporter	SLCO1B1	CURATED	10599	DTO_05007405	2011	0.731	C1458155	Q9Y6L6	Neoplastic Process	Mammary Neoplasms	C04;C17	0.3	2011	0.538
group	3.9682e-22		Neoplasms; Skin and Connective Tissue Diseases	1		CTU2	CURATED	348180		2016	0.423	C1458155	Q2VPK5	Neoplastic Process	Mammary Neoplasms	C04;C17	0.3	2016	0.695
phenotype	0.066228		Neoplasms	1	Receptor	SCARB1	CURATED	949	DTO_05007575	2002	0.731	C0024668	Q8WTV0	Neoplastic Process; Experimental Model of Disease	Mammary Neoplasms, Experimental	C04	0.3	2002	0.559
phenotype	0.73709		Neoplasms	1	Nucleic acid binding	EIF5A	CURATED	1984	DTO_05007557	2005	0.692	C0024668	P63241	Neoplastic Process; Experimental Model of Disease	Mammary Neoplasms, Experimental	C04	0.3	2005	0.612
phenotype	7.5307e-05		Neoplasms	1	Enzyme	GGT1	CURATED	2678	DTO_05007624	2002	0.885	C0024668	P19440	Neoplastic Process; Experimental Model of Disease	Mammary Neoplasms, Experimental	C04	0.3	2002	0.496
phenotype	1.2712e-09		Neoplasms	1	Enzyme	LPL	CURATED	4023	DTO_05007624	2002	0.808	C0024668	P06858	Neoplastic Process; Experimental Model of Disease	Mammary Neoplasms, Experimental	C04	0.3	2002	0.474
phenotype	0.030182		Neoplasms	1	Nuclear receptor	PPARA	CURATED	5465	DTO_00102000	2000	0.885	C0024668	Q07869	Neoplastic Process; Experimental Model of Disease	Mammary Neoplasms, Experimental	C04	0.3	2000	0.432
phenotype	0.15499		Neoplasms	1	Enzyme	SOD2	CURATED	6648	DTO_05007624	2014	0.923	C0024668	P04179	Neoplastic Process; Experimental Model of Disease	Mammary Neoplasms, Experimental	C04	0.3	2014	0.379
phenotype	0.17989		Neoplasms	1	Cellular structure	EZR	CURATED	7430	DTO_05007530	2002	0.808	C0024668	P15311	Neoplastic Process; Experimental Model of Disease	Mammary Neoplasms, Experimental	C04	0.3	2002	0.476
disease	1.1586e-09		Neoplasms; Skin and Connective Tissue Diseases	1		PDZK1	CURATED	5174		2015	0.654	C1257931	Q5T2W1	Neoplastic Process	Mammary Neoplasms, Human	C04;C17	0.3	2015	0.65
disease	0.96926		Neoplasms; Skin and Connective Tissue Diseases	1		NECTIN2	CURATED	5819		2013	0.769	C1257931	Q92692	Neoplastic Process	Mammary Neoplasms, Human	C04;C17	0.3	2013	0.575
disease	0.15499		Neoplasms; Skin and Connective Tissue Diseases	1	Enzyme	SOD2	CURATED	6648	DTO_05007624	2010	0.923	C1257931	P04179	Neoplastic Process	Mammary Neoplasms, Human	C04;C17	0.3	2008	0.379
disease	0.26588		Neoplasms; Skin and Connective Tissue Diseases	1	Signaling	STC2	CURATED	8614	DTO_05007599	2008	0.692	C1257931	O76061	Neoplastic Process	Mammary Neoplasms, Human	C04;C17	0.3	2008	0.573
disease	8.5042e-14		Neoplasms; Skin and Connective Tissue Diseases	1	Enzyme	SYNJ2	CURATED	8871	DTO_05007624	2005	0.577	C1257931	O15056	Neoplastic Process	Mammary Neoplasms, Human	C04;C17	0.3	2005	0.691
disease	1.1086e-21		Neoplasms; Skin and Connective Tissue Diseases	1	Transporter	SLCO1B1	CURATED	10599	DTO_05007405	2011	0.731	C1257931	Q9Y6L6	Neoplastic Process	Mammary Neoplasms, Human	C04;C17	0.3	2011	0.538
disease	3.9682e-22		Neoplasms; Skin and Connective Tissue Diseases	1		CTU2	CURATED	348180		2016	0.423	C1257931	Q2VPK5	Neoplastic Process	Mammary Neoplasms, Human	C04;C17	0.3	2016	0.695
disease	0.15499		Congenital, Hereditary, and Neonatal Diseases and Abnormalities; Skin and Connective Tissue Diseases; Musculoskeletal Diseases; Cardiovascular Diseases	1	Enzyme	SOD2	CURATED	6648	DTO_05007624	2014	0.923	C0024796	P04179	Disease or Syndrome	Marfan Syndrome	C16;C17;C05;C14	0.3	2014	0.379
disease	0.15499		Congenital, Hereditary, and Neonatal Diseases and Abnormalities; Skin and Connective Tissue Diseases; Musculoskeletal Diseases; Cardiovascular Diseases	1	Enzyme	SOD2	CURATED	6648	DTO_05007624	2014	0.923	C4721845	P04179	Disease or Syndrome	Marfan Syndrome, Type I	C16;C17;C05;C14	0.3	2014	0.379
disease	0.066228		Chemically-Induced Disorders; Mental Disorders	1	Receptor	SCARB1	CURATED	949	DTO_05007575	2006	0.731	C0024809	Q8WTV0	Mental or Behavioral Dysfunction	Marijuana Abuse	C25;F03	0.3	2006	0.559
disease	0.64329		Mental Disorders	1	Transporter	ALB	CURATED	213	DTO_05007405	1996	0.962	C0025193	P02768	Mental or Behavioral Dysfunction	Melancholia	F03	0.3	1996	0.317
disease	0.0184		Mental Disorders	1	Signaling	FGF2	CURATED	2247	DTO_05007599	2006	0.923	C0025193	P09038	Mental or Behavioral Dysfunction	Melancholia	F03	0.3	2006	0.383
disease	0.038537		Neoplasms	1	Nucleic acid binding	KHDRBS2	CURATED	202559	DTO_05007557	2011	0.154	C0025202	Q5VWX1	Neoplastic Process	melanoma	C04	0.3	2011	0.861
disease	0.15499		Congenital, Hereditary, and Neonatal Diseases and Abnormalities; Nutritional and Metabolic Diseases; Musculoskeletal Diseases; Nervous System Diseases; Cardiovascular Diseases	1	Enzyme	SOD2	CURATED	6648	DTO_05007624	2002	0.923	C0162671	P04179	Disease or Syndrome	MELAS Syndrome	C16;C18;C05;C10;C14	0.31	2001	0.379
disease	1.0376e-19		Congenital, Hereditary, and Neonatal Diseases and Abnormalities; Musculoskeletal Diseases	1	Enzyme modulator	HSPG2	CURATED	3339	DTO_05007584	2001	0.885	C0025237	P98160	Disease or Syndrome	Melnick-Needles Syndrome	C16;C05	0.3	1999	0.438
disease	0.64329		Female Urogenital Diseases and Pregnancy Complications; Male Urogenital Diseases; Immune System Diseases	1	Transporter	ALB	CURATED	213	DTO_05007405	1992	0.962	C0268742	P02768	Disease or Syndrome	Membranoproliferative Glomerulonephritis, Type I	C13;C12;C20	0.3	1992	0.317
disease	0.64329		Female Urogenital Diseases and Pregnancy Complications; Male Urogenital Diseases; Immune System Diseases	1	Transporter	ALB	CURATED	213	DTO_05007405	1992	0.962	C0268743	P02768	Disease or Syndrome	Membranoproliferative Glomerulonephritis, Type II	C13;C12;C20	0.3	1992	0.317
disease	0.64329		Female Urogenital Diseases and Pregnancy Complications; Male Urogenital Diseases; Immune System Diseases	1	Transporter	ALB	CURATED	213	DTO_05007405	1992	0.962	C1720821	P02768	Disease or Syndrome	Membranoproliferative Glomerulonephritis, Type III	C13;C12;C20	0.3	1992	0.317
disease	0.64329		Female Urogenital Diseases and Pregnancy Complications; Male Urogenital Diseases; Immune System Diseases	1	Transporter	ALB	CURATED	213	DTO_05007405	2018	0.962	C0017665	P02768	Disease or Syndrome	Membranous glomerulonephritis	C13;C12;C20	0.39	1992	0.317
disease	0.00054909		Female Urogenital Diseases and Pregnancy Complications; Male Urogenital Diseases; Immune System Diseases	1		APOA1	CURATED	335		1995	0.885	C0017665	P02647	Disease or Syndrome	Membranous glomerulonephritis	C13;C12;C20	0.3	1995	0.429
disease	0.0039011		Neoplasms; Nervous System Diseases	1		CST3	CURATED	1471		2010	0.808	C0025286	P01034	Neoplastic Process	Meningioma	C04;C10	0.32	2005	0.436
disease	0.0039011		Neoplasms; Nervous System Diseases	1		CST3	CURATED	1471		2010	0.808	C0205834	P01034	Neoplastic Process	Meningiomas, Multiple	C04;C10	0.3	2010	0.436
disease	0.0036969		Nervous System Diseases	1		CRP	CURATED	1401		2019	0.962	C0025289	P02741	Disease or Syndrome	Meningitis	C10	0.36	2003	0.299
disease	0.15499		Congenital, Hereditary, and Neonatal Diseases and Abnormalities; Nervous System Diseases	1	Enzyme	SOD2	CURATED	6648	DTO_05007624	2013	0.923	C0025312	P04179	Congenital Abnormality	Meningomyelocele	C16;C10	0.32	2012	0.379
disease	0.0039011		Neoplasms; Nervous System Diseases	1		CST3	CURATED	1471		2010	0.808	C0334605	P01034	Neoplastic Process	Meningothelial meningioma	C04;C10	0.3	2010	0.436
disease	3.0504e-07		Pathological Conditions, Signs and Symptoms; Nervous System Diseases; Mental Disorders; Behavior and Behavior Mechanisms	1	Enzyme	ALDH5A1	CURATED	7915	DTO_05007624	2013	0.462	C0917816	P51649	Mental or Behavioral Dysfunction	Mental deficiency	C23;C10;F03;F01	0.3	2013	0.619
disease	0.030057		Behavior and Behavior Mechanisms	0.667	Signaling	GH1	CURATED	2688	DTO_05007599	2019	0.923	C0011570	P01241	Mental or Behavioral Dysfunction	Mental Depression	F01	0.32	1996	0.373
disease	0.00091697		Behavior and Behavior Mechanisms	1	G-protein coupled receptor	MC4R	CURATED	4160	DTO_02300001	2019	0.692	C0011570	P32245	Mental or Behavioral Dysfunction	Mental Depression	F01	0.31	2008	0.535
disease	0.15499		Behavior and Behavior Mechanisms	1	Enzyme	SOD2	CURATED	6648	DTO_05007624	2018	0.923	C0011570	P04179	Mental or Behavioral Dysfunction	Mental Depression	F01	0.31	2012	0.379
disease	1.9234e-16		Congenital, Hereditary, and Neonatal Diseases and Abnormalities; Nutritional and Metabolic Diseases	0.992		APOB	CURATED	338		2019	0.808	C0745103	P04114	Disease or Syndrome	Hyperlipoproteinemia Type IIa	C16;C18	0.5	1988	0.453
disease	1.9234e-16	definitive	Congenital, Hereditary, and Neonatal Diseases and Abnormalities; Nutritional and Metabolic Diseases	0.986		APOB	CURATED	338		2018	0.808	C1704417	P04114	Disease or Syndrome	Hyperlipoproteinemia Type IIb	C16;C18	0.8	1978	0.453
phenotype	0.96926		Mental Disorders	1		NECTIN2	CURATED	5819		2018	0.769	C0234985	Q92692	Mental or Behavioral Dysfunction	Mental deterioration	F03	0.3	2018	0.575
group	0.030182		Cardiovascular Diseases	1	Nuclear receptor	PPARA	CURATED	5465	DTO_00102000	2018	0.885	C0020538	Q07869	Disease or Syndrome	Hypertensive disease	C14	0.57	2002	0.432
phenotype	1.9234e-16		Nutritional and Metabolic Diseases	1		APOB	CURATED	338		2019	0.808	C0020557	P04114	Disease or Syndrome	Hypertriglyceridemia	C18	0.6	1991	0.453
phenotype	3.0504e-07		Pathological Conditions, Signs and Symptoms; Nervous System Diseases; Mental Disorders; Behavior and Behavior Mechanisms	1	Enzyme	ALDH5A1	CURATED	7915	DTO_05007624	2013	0.462	C0025363	P51649	Mental or Behavioral Dysfunction	Mental Retardation, Psychosocial	C23;C10;F03;F01	0.3	2013	0.619
disease	0.0018685		Chemically-Induced Disorders	1		APOE	CURATED	348		2006	0.962	C0025427	P02649	Injury or Poisoning	Mercury Poisoning	C25	0.3	2006	0.338
disease	0.65372		Digestive System Diseases; Cardiovascular Diseases	1	Kinase	JAK2	CURATED	3717	DTO_03300101	2010	0.885	C0025472	O60674	Disease or Syndrome	Mesenteric Vascular Occlusion	C06;C14	0.3	2010	0.385
disease	0.0184		Neoplasms	1	Signaling	FGF2	CURATED	2247	DTO_05007599	2014	0.923	C0025500	P09038	Neoplastic Process	Mesothelioma	C04	0.33	2004	0.383
disease	0.15499		Neoplasms	0.75	Enzyme	SOD2	CURATED	6648	DTO_05007624	2007	0.923	C0025500	P04179	Neoplastic Process	Mesothelioma	C04	0.32	1998	0.379
group	0.0003636		Nutritional and Metabolic Diseases; Musculoskeletal Diseases	1	Enzyme	ALPL	CURATED	249	DTO_05007624	2019	0.769	C0005944	P05186	Disease or Syndrome	Metabolic Bone Disorder	C18;C05	0.33	2016	0.546
group	0.99999		Nutritional and Metabolic Diseases; Musculoskeletal Diseases	1		LRP2	CURATED	4036		1999	0.846	C0005944	P98164	Disease or Syndrome	Metabolic Bone Disorder	C18;C05	0.3	1999	0.491
group	3.793e-10		Nutritional and Metabolic Diseases; Musculoskeletal Diseases	1		CYP2R1	CURATED	120227		2014	0.731	C0005944	Q6VVX0	Disease or Syndrome	Metabolic Bone Disorder	C18;C05	0.3	2014	0.563
group	0.0036969		Nutritional and Metabolic Diseases	0.909		CRP	CURATED	1401		2020	0.962	C0025517	P02741	Disease or Syndrome	Metabolic Diseases	C18	0.4	2006	0.299
disease	3.0504e-07		Nutritional and Metabolic Diseases; Nervous System Diseases	1	Enzyme	ALDH5A1	CURATED	7915	DTO_05007624	2007	0.462	C0751743	P51649	Disease or Syndrome	Metabolic Disorder, Central Nervous System, Acquired	C18;C10	0.3	2007	0.619
disease	0.0036969		Nutritional and Metabolic Diseases	0.965		CRP	CURATED	1401		2020	0.962	C0524620	P02741	Disease or Syndrome	Metabolic Syndrome X	C18	0.4	2003	0.299
group	0.030182		Digestive System Diseases; Neoplasms	1	Nuclear receptor	PPARA	CURATED	5465	DTO_00102000	2019	0.885	C0023903	Q07869	Neoplastic Process	Liver neoplasms	C06;C04	0.58	2003	0.432
disease	0.030182		Digestive System Diseases; Neoplasms	1	Nuclear receptor	PPARA	CURATED	5465	DTO_00102000	2019	0.885	C0345904	Q07869	Neoplastic Process	Malignant neoplasm of liver	C06;C04	0.55	1999	0.432
disease	1.2538e-06		Nutritional and Metabolic Diseases	1		SHBG	CURATED	6462		2019	0.808	C0524620	P04278	Disease or Syndrome	Metabolic Syndrome X	C18	0.4	2000	0.438
phenotype	0.15499		Congenital, Hereditary, and Neonatal Diseases and Abnormalities; Nutritional and Metabolic Diseases	1	Enzyme	SOD2	CURATED	6648	DTO_05007624	2006	0.923	C0268583	P04179	Disease or Syndrome	Methylmalonic acidemia	C16;C18	0.3	2006	0.379
disease	0.15499		Congenital, Hereditary, and Neonatal Diseases and Abnormalities; Nutritional and Metabolic Diseases	1	Enzyme	SOD2	CURATED	6648	DTO_05007624	2006	0.923	C1855119	P04179	Disease or Syndrome	Methylmalonic aciduria	C16;C18	0.3	2006	0.379
disease	1		Hemic and Lymphatic Diseases	1		SPTB	CURATED	6710		1997	0.462	C0221021	P11277	Disease or Syndrome	Microangiopathic hemolytic anemia	C15	0.3	1997	0.65
disease	0.64329		Endocrine System Diseases; Cardiovascular Diseases	1	Transporter	ALB	CURATED	213	DTO_05007405	2010	0.962	C0025945	P02768	Disease or Syndrome	Microangiopathy, Diabetic	C19;C14	0.3	2010	0.317
phenotype	0.0003636		Nutritional and Metabolic Diseases	1	Enzyme	ALPL	CURATED	249	DTO_05007624	2011	0.769	C0521174	P05186	Pathologic Function	Microcalcification	C18	0.3	2011	0.546
phenotype	0.65372		Nutritional and Metabolic Diseases	1	Kinase	JAK2	CURATED	3717	DTO_03300101	2011	0.885	C0521174	O60674	Pathologic Function	Microcalcification	C18	0.3	2011	0.385
disease	3.9682e-22	strong		1		CTU2	CURATED	348180		2019	0.423	C4748348	Q2VPK5	Disease or Syndrome	MICROCEPHALY, FACIAL DYSMORPHISM, RENAL AGENESIS, AND AMBIGUOUS GENITALIA SYNDROME		0.4	2016	0.695
disease	0.0039011		Neoplasms; Nervous System Diseases	1		CST3	CURATED	1471		2010	0.808	C1384408	P01034	Neoplastic Process	Microcystic meningioma	C04;C10	0.3	2010	0.436
disease	0.15499			NA	Enzyme	SOD2	CURATED	6648	DTO_05007624	NA	0.923	C2675128	P04179	Finding	MICROVASCULAR COMPLICATIONS OF DIABETES, SUSCEPTIBILITY TO, 6 (finding)		0.3	NA	0.379
phenotype	0.15499		Pathological Conditions, Signs and Symptoms; Nervous System Diseases; Cardiovascular Diseases	1	Enzyme	SOD2	CURATED	6648	DTO_05007624	2011	0.923	C0751845	P04179	Disease or Syndrome	Middle Cerebral Artery Embolus	C23;C10;C14	0.3	2011	0.379
disease	0.15499		Pathological Conditions, Signs and Symptoms; Nervous System Diseases; Cardiovascular Diseases	1	Enzyme	SOD2	CURATED	6648	DTO_05007624	2011	0.923	C0740391	P04179	Acquired Abnormality	Middle Cerebral Artery Occlusion	C23;C10;C14	0.3	2011	0.379
phenotype	0.15499		Pathological Conditions, Signs and Symptoms; Nervous System Diseases; Cardiovascular Diseases	1	Enzyme	SOD2	CURATED	6648	DTO_05007624	2011	0.923	C0238281	P04179	Disease or Syndrome	Middle Cerebral Artery Syndrome	C23;C10;C14	0.3	2011	0.379
disease	0.15499		Pathological Conditions, Signs and Symptoms; Nervous System Diseases; Cardiovascular Diseases	1	Enzyme	SOD2	CURATED	6648	DTO_05007624	2011	0.923	C0740376	P04179	Disease or Syndrome	Middle Cerebral Artery Thrombosis	C23;C10;C14	0.3	2011	0.379
disease	0.030182		Pathological Conditions, Signs and Symptoms; Cardiovascular Diseases	1	Nuclear receptor	PPARA	CURATED	5465	DTO_00102000	2011	0.885	C0035126	Q07869	Injury or Poisoning	Reperfusion Injury	C23;C14	0.5	2009	0.432
disease	0.96926		Mental Disorders	1		NECTIN2	CURATED	5819		2018	0.769	C1270972	Q92692	Mental or Behavioral Dysfunction	Mild cognitive disorder	F03	0.31	2018	0.575
disease	1.9234e-16		Digestive System Diseases	1		APOB	CURATED	338		2018	0.808	C2711227	P04114	Disease or Syndrome	Steatohepatitis	C06	0.5	1996	0.453
disease	0.046698		Nutritional and Metabolic Diseases	1	G-protein coupled receptor	CASR	CURATED	846	DTO_02300001	1997	0.846	C0026141	P41180	Disease or Syndrome	Milk-Alkali Syndrome	C18	0.3	1997	0.41
disease	0.0018685		Female Urogenital Diseases and Pregnancy Complications	0.333		APOE	CURATED	348		2018	0.962	C4552766	P02649	Disease or Syndrome	Miscarriage	C13	0.32	2012	0.338
disease	0.65372		Female Urogenital Diseases and Pregnancy Complications	1	Kinase	JAK2	CURATED	3717	DTO_03300101	2013	0.885	C4552766	O60674	Disease or Syndrome	Miscarriage	C13	0.32	2007	0.385
disease	0.91029		Female Urogenital Diseases and Pregnancy Complications	1	Enzyme modulator	IGFBP3	CURATED	3486	DTO_05007584	2008	0.808	C4552766	P17936	Disease or Syndrome	Miscarriage	C13	0.3	2008	0.439
group	0.15499		Nutritional and Metabolic Diseases	1	Enzyme	SOD2	CURATED	6648	DTO_05007624	2001	0.923	C0751651	P04179	Disease or Syndrome	Mitochondrial Diseases	C18	0.31	1999	0.379
disease	0.15499		Nutritional and Metabolic Diseases	1	Enzyme	SOD2	CURATED	6648	DTO_05007624	1999	0.923	C0949857	P04179	Disease or Syndrome	Mitochondrial Respiratory Chain Deficiencies	C18	0.3	1999	0.379
disease	3.2577e-06		Neoplasms; Immune System Diseases; Hemic and Lymphatic Diseases	1		UGT1A1	CURATED	54658		2009	0.769	C0152266	P22309	Neoplastic Process	Mixed Cellularity Hodgkin Lymphoma	C04;C20;C15	0.3	2009	0.464
disease	0.0184		Neoplasms	1	Signaling	FGF2	CURATED	2247	DTO_05007599	2000	0.923	C0259783	P09038	Neoplastic Process	mixed gliomas	C04	0.3	2000	0.383
group	0.0184		Mental Disorders	1	Signaling	FGF2	CURATED	2247	DTO_05007599	2018	0.923	C0525045	P09038	Mental or Behavioral Dysfunction	Mood Disorders	F03	0.33	2009	0.383
group	2.702e-17		Mental Disorders	1	Kinase	PFKL	CURATED	5211	DTO_03300101	1996	0.269	C0525045	P17858	Mental or Behavioral Dysfunction	Mood Disorders	F03	0.31	1996	0.722
disease	0.00054909		Skin and Connective Tissue Diseases; Immune System Diseases; Chemically-Induced Disorders	1		APOA1	CURATED	335		2010	0.885	C0406537	P02647	Disease or Syndrome	Morbilliform Drug Reaction	C17;C20;C25	0.3	2010	0.429
disease	0.010024		Skin and Connective Tissue Diseases; Immune System Diseases; Chemically-Induced Disorders	1		APOC3	CURATED	345		2010	0.731	C0406537	P02656	Disease or Syndrome	Morbilliform Drug Reaction	C17;C20;C25	0.3	2010	0.531
group	0.15499		Neoplasms; Stomatognathic Diseases	1	Enzyme	SOD2	CURATED	6648	DTO_05007624	2004	0.923	C0026640	P04179	Neoplastic Process	Mouth Neoplasms	C04;C07	0.31	1997	0.379
group	9.934e-07		Neoplasms; Stomatognathic Diseases	1	Enzyme	ADH1B	CURATED	125	DTO_05007624	2008	0.846	C0026640	P00325	Neoplastic Process	Mouth Neoplasms	C04;C07	0.3	2008	0.502
phenotype	0.15499		Immune System Diseases; Disorders of Environmental Origin	1	Enzyme	SOD2	CURATED	6648	DTO_05007624	2013	0.923	C0242992	P04179	Disease or Syndrome	Multiple Chemical Sensitivity	C20;C21	0.3	2013	0.379
disease	1.0376e-19		Congenital, Hereditary, and Neonatal Diseases and Abnormalities; Musculoskeletal Diseases	1	Enzyme modulator	HSPG2	CURATED	3339	DTO_05007584	2001	0.885	C0026760	P98160	Congenital Abnormality	Multiple Epiphyseal Dysplasia	C16;C05	0.3	1999	0.438
disease	0.15499		Neoplasms; Immune System Diseases; Hemic and Lymphatic Diseases; Cardiovascular Diseases	1	Enzyme	SOD2	CURATED	6648	DTO_05007624	2007	0.923	C0026764	P04179	Neoplastic Process	Multiple Myeloma	C04;C20;C15;C14	0.32	2005	0.379
disease	0.0018685		Immune System Diseases; Nervous System Diseases	0.877		APOE	CURATED	348		2019	0.962	C0026769	P02649	Disease or Syndrome	Multiple Sclerosis	C20;C10	0.4	1994	0.338
disease	0.96926		Immune System Diseases; Nervous System Diseases	0.667		NECTIN2	CURATED	5819		2007	0.769	C0026769	Q92692	Disease or Syndrome	Multiple Sclerosis	C20;C10	0.33	2004	0.575
disease	0.0018685		Immune System Diseases; Nervous System Diseases	1		APOE	CURATED	348		2004	0.962	C0751324	P02649	Disease or Syndrome	Multiple Sclerosis, Acute Fulminating	C20;C10	0.3	2004	0.338
disease	0.96926		Immune System Diseases; Nervous System Diseases	1		NECTIN2	CURATED	5819		2006	0.769	C0751324	Q92692	Disease or Syndrome	Multiple Sclerosis, Acute Fulminating	C20;C10	0.3	2006	0.575
disease	0.0018685		Immune System Diseases; Nervous System Diseases	1		APOE	CURATED	348		2004	0.962	C0393664	P02649	Disease or Syndrome	Multiple Sclerosis, Acute Relapsing	C20;C10	0.3	2004	0.338
disease	0.0018685		Immune System Diseases; Nervous System Diseases	1		APOE	CURATED	348		2009	0.962	C0751967	P02649	Disease or Syndrome	Multiple Sclerosis, Relapsing-Remitting	C20;C10	0.32	2004	0.338
phenotype	0.030057		Pathological Conditions, Signs and Symptoms; Nervous System Diseases	1	Signaling	GH1	CURATED	2688	DTO_05007599	2008	0.923	C0026846	P01241	Pathologic Function	Muscular Atrophy	C23;C10	0.31	1996	0.373
disease	1.1608e-12		Congenital, Hereditary, and Neonatal Diseases and Abnormalities; Musculoskeletal Diseases; Nervous System Diseases	1		TMEM43	CURATED	79188		2014	0.462	C0410189	Q9BTV4	Disease or Syndrome	Muscular Dystrophy, Emery-Dreifuss	C16;C05;C10	0.32	2011	0.653
disease	0.64329		Skin and Connective Tissue Diseases; Immune System Diseases; Chemically-Induced Disorders; Stomatognathic Diseases	1	Transporter	ALB	CURATED	213	DTO_05007405	2002	0.962	C3658301	P02768	Disease or Syndrome	Mycoplasma-Induced Stevens-Johnson Syndrome	C17;C20;C25;C07	0.3	2002	0.317
disease	0.15499		Congenital, Hereditary, and Neonatal Diseases and Abnormalities; Nervous System Diseases	1	Enzyme	SOD2	CURATED	6648	DTO_05007624	2012	0.923	C0086664	P04179	Congenital Abnormality	Myelocele	C16;C10	0.3	2012	0.379
group	1.2712e-09		Cardiovascular Diseases	1	Enzyme	LPL	CURATED	4023	DTO_05007624	1999	0.808	C0036529	P06858	Disease or Syndrome	Myocardial Diseases, Secondary	C14	0.3	1999	0.474
group	0.15499		Cardiovascular Diseases	1	Enzyme	SOD2	CURATED	6648	DTO_05007624	2013	0.923	C0036529	P04179	Disease or Syndrome	Myocardial Diseases, Secondary	C14	0.3	2013	0.379
disease	0.64329		Cardiovascular Diseases	1	Transporter	ALB	CURATED	213	DTO_05007405	2001	0.962	C1959583	P02768	Disease or Syndrome	Myocardial Failure	C14	0.3	2001	0.317
disease	0.031714		Cardiovascular Diseases	1		APCS	CURATED	325		2005	0.808	C1959583	P02743	Disease or Syndrome	Myocardial Failure	C14	0.3	2005	0.531
disease	0.0036969		Cardiovascular Diseases	1		CRP	CURATED	1401		2005	0.962	C1959583	P02741	Disease or Syndrome	Myocardial Failure	C14	0.3	2005	0.299
disease	0.15499		Cardiovascular Diseases	1	Enzyme	SOD2	CURATED	6648	DTO_05007624	2011	0.923	C1959583	P04179	Disease or Syndrome	Myocardial Failure	C14	0.3	2005	0.379
disease	0.0018685		Pathological Conditions, Signs and Symptoms; Cardiovascular Diseases	0.959		APOE	CURATED	348		2020	0.962	C0027051	P02649	Disease or Syndrome	Myocardial Infarction	C23;C14	0.4	1986	0.338
disease	7.5307e-05		Pathological Conditions, Signs and Symptoms; Cardiovascular Diseases	1	Enzyme	GGT1	CURATED	2678	DTO_05007624	2009	0.885	C0027051	P19440	Disease or Syndrome	Myocardial Infarction	C23;C14	0.3	2009	0.496
disease	0.0184		Cardiovascular Diseases	1	Signaling	FGF2	CURATED	2247	DTO_05007599	2018	0.923	C0151744	P09038	Disease or Syndrome	Myocardial Ischemia	C14	0.32	2001	0.383
disease	0.91029		Cardiovascular Diseases	1	Enzyme modulator	IGFBP3	CURATED	3486	DTO_05007584	2005	0.808	C0151744	P17936	Disease or Syndrome	Myocardial Ischemia	C14	0.32	2000	0.439
disease	0.15499		Cardiovascular Diseases	1	Enzyme	SOD2	CURATED	6648	DTO_05007624	2011	0.923	C0151744	P04179	Disease or Syndrome	Myocardial Ischemia	C14	0.31	2005	0.379
disease	3.7625e-18		Cardiovascular Diseases	1	Kinase	PFKM	CURATED	5213	DTO_03300101	2005	0.5	C0151744	P08237	Disease or Syndrome	Myocardial Ischemia	C14	0.3	2005	0.666
disease	7.7599e-06		Cardiovascular Diseases	1	Receptor	CLEC10A	CURATED	10462	DTO_05007575	2005	0.692	C0151744	Q8IUN9	Disease or Syndrome	Myocardial Ischemia	C14	0.3	2005	0.606
phenotype	0.64329		Pathological Conditions, Signs and Symptoms; Cardiovascular Diseases	1	Transporter	ALB	CURATED	213	DTO_05007405	1998	0.962	C0027055	P02768	Pathologic Function	Myocardial Reperfusion Injury	C23;C14	0.3	1998	0.317
phenotype	0.030182		Pathological Conditions, Signs and Symptoms; Cardiovascular Diseases	1	Nuclear receptor	PPARA	CURATED	5465	DTO_00102000	2006	0.885	C0027055	Q07869	Pathologic Function	Myocardial Reperfusion Injury	C23;C14	0.3	2006	0.432
disease	0.0036969		Cardiovascular Diseases	0.833		CRP	CURATED	1401		2019	0.962	C0027059	P02741	Disease or Syndrome	Myocarditis	C14	0.35	2009	0.299
disease	7.7723e-10		Cardiovascular Diseases	1	Transporter	SLC22A3	CURATED	6581	DTO_05007405	2011	0.846	C0027059	O75751	Disease or Syndrome	Myocarditis	C14	0.3	2011	0.531
phenotype	0.0003636		Pathological Conditions, Signs and Symptoms; Nervous System Diseases	1	Enzyme	ALPL	CURATED	249	DTO_05007624	2016	0.769	C4317123	P05186	Sign or Symptom	Myoclonic Seizures	C23;C10	0.3	1995	0.546
phenotype	0.0018685		Pathological Conditions, Signs and Symptoms; Nervous System Diseases	1		APOE	CURATED	348		2013	0.962	C4317123	P02649	Sign or Symptom	Myoclonic Seizures	C23;C10	0.3	2013	0.338
phenotype	0.0184		Pathological Conditions, Signs and Symptoms; Nervous System Diseases	1	Signaling	FGF2	CURATED	2247	DTO_05007599	2011	0.923	C4317123	P09038	Sign or Symptom	Myoclonic Seizures	C23;C10	0.3	2011	0.383
phenotype	0.15499		Pathological Conditions, Signs and Symptoms; Nervous System Diseases	1	Enzyme	SOD2	CURATED	6648	DTO_05007624	2010	0.923	C4317123	P04179	Sign or Symptom	Myoclonic Seizures	C23;C10	0.3	2010	0.379
group	0.64329		Musculoskeletal Diseases; Nervous System Diseases	1	Transporter	ALB	CURATED	213	DTO_05007405	1973	0.962	C0026848	P02768	Disease or Syndrome	Myopathy	C05;C10	0.3	1973	0.317
group	0.030182		Musculoskeletal Diseases; Nervous System Diseases	1	Nuclear receptor	PPARA	CURATED	5465	DTO_00102000	2010	0.885	C0026848	Q07869	Disease or Syndrome	Myopathy	C05;C10	0.31	2010	0.432
disease	0.15499		Neoplasms; Stomatognathic Diseases; Otorhinolaryngologic Diseases	1	Enzyme	SOD2	CURATED	6648	DTO_05007624	2010	0.923	C2931822	P04179	Neoplastic Process	Nasopharyngeal carcinoma	C04;C07;C09	0.32	2010	0.379
phenotype	1.2712e-09		Pathological Conditions, Signs and Symptoms	1	Enzyme	LPL	CURATED	4023	DTO_05007624	1999	0.808	C0027540	P06858	Organ or Tissue Function	Necrosis	C23	0.3	1999	0.474
phenotype	0.15499		Pathological Conditions, Signs and Symptoms	1	Enzyme	SOD2	CURATED	6648	DTO_05007624	2009	0.923	C0027540	P04179	Organ or Tissue Function	Necrosis	C23	0.3	1998	0.379
phenotype	0.00093892		Pathological Conditions, Signs and Symptoms	1	Nuclear receptor	NR1H4	CURATED	9971	DTO_00102000	2019	0.808	C0027540	Q96RI1	Organ or Tissue Function	Necrosis	C23	0.3	2019	0.513
disease	0.15499		Digestive System Diseases	1	Enzyme	SOD2	CURATED	6648	DTO_05007624	2008	0.923	C0520459	P04179	Disease or Syndrome	Necrotizing Enterocolitis	C06	0.3	2008	0.379
disease	0.63464	strong	Congenital, Hereditary, and Neonatal Diseases and Abnormalities; Nutritional and Metabolic Diseases; Endocrine System Diseases	1	Kinase	GCK	CURATED	2645	DTO_03300101	2018	0.808	C0158981	P35557	Disease or Syndrome	Neonatal diabetes mellitus	C16;C18;C19	0.4	2003	0.523
phenotype	7.2668e-09		Pathological Conditions, Signs and Symptoms; Congenital, Hereditary, and Neonatal Diseases and Abnormalities	1	Nuclear receptor	NR1I2	CURATED	8856	DTO_00102000	2012	0.846	C0022353	O75469	Disease or Syndrome	Neonatal Jaundice	C23;C16	0.31	2012	0.418
phenotype	1.2538e-06		Pathological Conditions, Signs and Symptoms; Neoplasms	1		SHBG	CURATED	6462		2013	0.808	C0027626	P04278	Pathologic Function	Neoplasm Invasiveness	C23;C04	0.3	2013	0.438
phenotype	0.15499		Pathological Conditions, Signs and Symptoms; Neoplasms	1	Enzyme	SOD2	CURATED	6648	DTO_05007624	2012	0.923	C0027626	P04179	Pathologic Function	Neoplasm Invasiveness	C23;C04	0.3	2000	0.379
phenotype	3.9682e-22		Pathological Conditions, Signs and Symptoms; Neoplasms	1		CTU2	CURATED	348180		2016	0.423	C0027626	Q2VPK5	Pathologic Function	Neoplasm Invasiveness	C23;C04	0.3	2016	0.695
phenotype	0.15499		Pathological Conditions, Signs and Symptoms; Neoplasms	1	Enzyme	SOD2	CURATED	6648	DTO_05007624	2019	0.923	C0027627	P04179	Neoplastic Process	Neoplasm Metastasis	C23;C04	0.4	1996	0.379
phenotype	0.17989		Pathological Conditions, Signs and Symptoms; Neoplasms	0.975	Cellular structure	EZR	CURATED	7430	DTO_05007530	2020	0.808	C0027627	P15311	Neoplastic Process	Neoplasm Metastasis	C23;C04	0.4	1999	0.476
phenotype	0.96926		Pathological Conditions, Signs and Symptoms; Neoplasms	1		NECTIN2	CURATED	5819		2019	0.769	C0027627	Q92692	Neoplastic Process	Neoplasm Metastasis	C23;C04	0.32	2018	0.575
phenotype	3.9682e-22		Pathological Conditions, Signs and Symptoms; Neoplasms	1		CTU2	CURATED	348180		2016	0.423	C0027627	Q2VPK5	Neoplastic Process	Neoplasm Metastasis	C23;C04	0.3	2016	0.695
disease	1.6432e-05		Neoplasms; Female Urogenital Diseases and Pregnancy Complications; Male Urogenital Diseases	NA	Kinase	FGFR3	CURATED	2261	DTO_03300101	NA	0.846	C0496930	P22607	Neoplastic Process	Neoplasm of uncertain or unknown behavior of bladder	C04;C13;C12	0.3	NA	0.391
disease	1		Neoplasms; Skin and Connective Tissue Diseases	NA		ARID1B	CURATED	57492		NA	0.846	C0496956	Q8NFD5	Neoplastic Process	Neoplasm of uncertain or unknown behavior of breast	C04;C17	0.3	NA	0.503
group	0.15499		Neoplasms	0.95	Enzyme	SOD2	CURATED	6648	DTO_05007624	2019	0.923	C0027651	P04179	Neoplastic Process	Neoplasms	C04	0.4	1992	0.379
group	0.030182		Neoplasms	0.938	Nuclear receptor	PPARA	CURATED	5465	DTO_00102000	2019	0.885	C0027651	Q07869	Neoplastic Process	Neoplasms	C04	0.4	2000	0.432
group	0.15499		Neoplasms; Nervous System Diseases	1	Enzyme	SOD2	CURATED	6648	DTO_05007624	2011	0.923	C1527390	P04179	Neoplastic Process	Neoplasms, Intracranial	C04;C10	0.3	2011	0.379
phenotype	3.4212e-10		Pathological Conditions, Signs and Symptoms; Neoplasms	1		POR	CURATED	5447		2004	0.769	C0007621	P16435	Neoplastic Process	Neoplastic Cell Transformation	C23;C04	0.3	2004	0.502
phenotype	0.15499		Pathological Conditions, Signs and Symptoms; Neoplasms	1	Enzyme	SOD2	CURATED	6648	DTO_05007624	2014	0.923	C0007621	P04179	Neoplastic Process	Neoplastic Cell Transformation	C23;C04	0.3	1997	0.379
disease	0.64329		Female Urogenital Diseases and Pregnancy Complications; Male Urogenital Diseases	1	Transporter	ALB	CURATED	213	DTO_05007405	2019	0.962	C0027697	P02768	Disease or Syndrome	Nephritis	C13;C12	0.32	1979	0.317
disease	0.64329		Female Urogenital Diseases and Pregnancy Complications; Male Urogenital Diseases	1	Transporter	ALB	CURATED	213	DTO_05007405	2013	0.962	C0027707	P02768	Disease or Syndrome	Nephritis, Interstitial	C13;C12	0.3	2000	0.317
disease	0.0036969		Female Urogenital Diseases and Pregnancy Complications; Male Urogenital Diseases	1		CRP	CURATED	1401		2006	0.962	C0027707	P02741	Disease or Syndrome	Nephritis, Interstitial	C13;C12	0.3	2006	0.299
disease	0.64329		Female Urogenital Diseases and Pregnancy Complications; Male Urogenital Diseases	1	Transporter	ALB	CURATED	213	DTO_05007405	2013	0.962	C0041349	P02768	Disease or Syndrome	Nephritis, Tubulointerstitial	C13;C12	0.3	2000	0.317
disease	0.0036969		Female Urogenital Diseases and Pregnancy Complications; Male Urogenital Diseases	1		CRP	CURATED	1401		2006	0.962	C0041349	P02741	Disease or Syndrome	Nephritis, Tubulointerstitial	C13;C12	0.3	2006	0.299
disease	1		Congenital, Hereditary, and Neonatal Diseases and Abnormalities; Neoplasms; Female Urogenital Diseases and Pregnancy Complications; Male Urogenital Diseases	1	Kinase	MAP3K4	CURATED	4216	DTO_03300101	2017	0.462	C0027708	Q9Y6R4	Neoplastic Process	Nephroblastoma	C16;C04;C13;C12	0.3	2017	0.729
disease	0.0184		Female Urogenital Diseases and Pregnancy Complications; Male Urogenital Diseases	1	Signaling	FGF2	CURATED	2247	DTO_05007599	2019	0.923	C0027719	P09038	Disease or Syndrome	Nephrosclerosis	C13;C12	0.3	2019	0.383
disease	0.64329		Female Urogenital Diseases and Pregnancy Complications; Male Urogenital Diseases	1	Transporter	ALB	CURATED	213	DTO_05007405	1990	0.962	C0027720	P02768	Disease or Syndrome	Nephrosis	C13;C12	0.31	1987	0.317
group	0.64329		Female Urogenital Diseases and Pregnancy Complications; Male Urogenital Diseases	0.913	Transporter	ALB	CURATED	213	DTO_05007405	2019	0.962	C0027726	P02768	Disease or Syndrome	Nephrotic Syndrome	C13;C12	0.4	1990	0.317
group	0.0184		Female Urogenital Diseases and Pregnancy Complications; Male Urogenital Diseases	1	Signaling	FGF2	CURATED	2247	DTO_05007599	2011	0.923	C0027726	P09038	Disease or Syndrome	Nephrotic Syndrome	C13;C12	0.3	2011	0.383
group	0.15499		Female Urogenital Diseases and Pregnancy Complications; Male Urogenital Diseases	1	Enzyme	SOD2	CURATED	6648	DTO_05007624	1997	0.923	C0027726	P04179	Disease or Syndrome	Nephrotic Syndrome	C13;C12	0.3	1997	0.379
phenotype	0.0018685		Pathological Conditions, Signs and Symptoms	1		APOE	CURATED	348		2009	0.962	C0027746	P02649	Cell or Molecular Dysfunction	Nerve Degeneration	C23	0.3	2009	0.338
phenotype	0.0184		Pathological Conditions, Signs and Symptoms	1	Signaling	FGF2	CURATED	2247	DTO_05007599	1998	0.923	C0027746	P09038	Cell or Molecular Dysfunction	Nerve Degeneration	C23	0.3	1998	0.383
phenotype	0.15499		Pathological Conditions, Signs and Symptoms	1	Enzyme	SOD2	CURATED	6648	DTO_05007624	2000	0.923	C0027746	P04179	Cell or Molecular Dysfunction	Nerve Degeneration	C23	0.3	2000	0.379
disease	0.0036969		Nervous System Diseases; Chemically-Induced Disorders	1		CRP	CURATED	1401		2012	0.962	C0274862	P02741	Injury or Poisoning	Nervous System, Organic Arsenic Poisoning	C10;C25	0.3	2012	0.299
disease	0.15499		Nervous System Diseases; Chemically-Induced Disorders	1	Enzyme	SOD2	CURATED	6648	DTO_05007624	2006	0.923	C0274862	P04179	Injury or Poisoning	Nervous System, Organic Arsenic Poisoning	C10;C25	0.3	2006	0.379
disease	1		Neoplasms	1		ARID1B	CURATED	57492		2017	0.846	C0027819	Q8NFD5	Neoplastic Process	Neuroblastoma	C04	0.32	2013	0.503
group	0.15499		Nervous System Diseases	1	Enzyme	SOD2	CURATED	6648	DTO_05007624	2013	0.923	C0524851	P04179	Disease or Syndrome	Neurodegenerative Disorders	C10	0.31	2000	0.379
group	1		Mental Disorders	0.75		ARID1B	CURATED	57492		2019	0.846	C1535926	Q8NFD5	Mental or Behavioral Dysfunction	Neurodevelopmental Disorders	F03	0.32	2012	0.503
phenotype	0.030057		Pathological Conditions, Signs and Symptoms; Nervous System Diseases	1	Signaling	GH1	CURATED	2688	DTO_05007599	1996	0.923	C0270948	P01241	Pathologic Function	Neurogenic Muscular Atrophy	C23;C10	0.3	1996	0.373
group	3.0504e-07		Pathological Conditions, Signs and Symptoms; Nervous System Diseases	1	Enzyme	ALDH5A1	CURATED	7915	DTO_05007624	2018	0.462	C0521654	P51649	Finding	Neurologic Deficits	C23;C10	0.3	2018	0.619
phenotype	3.0504e-07		Pathological Conditions, Signs and Symptoms; Nervous System Diseases	1	Enzyme	ALDH5A1	CURATED	7915	DTO_05007624	2018	0.462	C0751377	P51649	Finding	Neurologic Dysfunction	C23;C10	0.3	2018	0.619
phenotype	3.0504e-07		Pathological Conditions, Signs and Symptoms; Nervous System Diseases	1	Enzyme	ALDH5A1	CURATED	7915	DTO_05007624	2018	0.462	C0027854	P51649	Finding	Neurologic Manifestations	C23;C10	0.3	2018	0.619
phenotype	3.0504e-07		Pathological Conditions, Signs and Symptoms; Nervous System Diseases	1	Enzyme	ALDH5A1	CURATED	7915	DTO_05007624	2018	0.462	C0751378	P51649	Sign or Symptom	Neurologic Signs	C23;C10	0.3	2018	0.619
group	3.0504e-07		Pathological Conditions, Signs and Symptoms; Nervous System Diseases	1	Enzyme	ALDH5A1	CURATED	7915	DTO_05007624	2018	0.462	C0235031	P51649	Sign or Symptom	Neurologic Symptoms	C23;C10	0.3	2018	0.619
group	3.0504e-07		Pathological Conditions, Signs and Symptoms; Nervous System Diseases	1	Enzyme	ALDH5A1	CURATED	7915	DTO_05007624	2018	0.462	C0422837	P51649	Finding	Neurological observations	C23;C10	0.3	2018	0.619
group	7.8157e-09		Nervous System Diseases; Chemically-Induced Disorders	1	Immune response	CRISPLD2	CURATED	83716	DTO_05007608	2010	0.769	C0235032	Q9H0B8	Injury or Poisoning	Neurotoxicity Syndromes	C10;C25	0.3	2010	0.585
disease	3.2577e-06		Hemic and Lymphatic Diseases	0.907		UGT1A1	CURATED	54658		2020	0.769	C0027947	P22309	Disease or Syndrome	Neutropenia	C15	0.4	2004	0.464
disease	0.45637		Hemic and Lymphatic Diseases	1	Cell adhesion	FCGR2B	CURATED	2213	DTO_05007620	2000	0.846	C0027947	P31994	Disease or Syndrome	Neutropenia	C15	0.3	2000	0.522
disease	1.6432e-05		Neoplasms	NA	Kinase	FGFR3	CURATED	2261	DTO_03300101	NA	0.846	C4011754	P22607	Neoplastic Process	Nevus, Keratinocytic, Nonepidermolytic	C04	0.3	NA	0.391
phenotype	7.2668e-09		Pathological Conditions, Signs and Symptoms; Congenital, Hereditary, and Neonatal Diseases and Abnormalities	1	Nuclear receptor	NR1I2	CURATED	8856	DTO_00102000	2012	0.846	C1565887	O75469	Sign or Symptom	Newborn physiological jaundice	C23;C16	0.3	2012	0.418
disease	1.4921e-16		Congenital, Hereditary, and Neonatal Diseases and Abnormalities; Eye Diseases	1	Enzyme modulator	SAG	CURATED	6295	DTO_05007584	1995	0.731	C3501847	P10523	Disease or Syndrome	Night blindness, congenital stationary, type 1	C16;C11	0.3	1995	0.57
disease	1.4921e-16		Congenital, Hereditary, and Neonatal Diseases and Abnormalities; Eye Diseases	1	Enzyme modulator	SAG	CURATED	6295	DTO_05007584	1995	0.731	C3495587	P10523	Disease or Syndrome	Night Blindness, Congenital Stationary, Type 1A	C16;C11	0.3	1995	0.57
disease	1.4921e-16		Congenital, Hereditary, and Neonatal Diseases and Abnormalities; Eye Diseases	1	Enzyme modulator	SAG	CURATED	6295	DTO_05007584	1995	0.731	C1850362	P10523	Disease or Syndrome	NIGHT BLINDNESS, CONGENITAL STATIONARY, TYPE 1B	C16;C11	0.3	1995	0.57
disease	1.4921e-16		Congenital, Hereditary, and Neonatal Diseases and Abnormalities; Eye Diseases	1	Enzyme modulator	SAG	CURATED	6295	DTO_05007584	1995	0.731	C1848172	P10523	Disease or Syndrome	NIGHT BLINDNESS, CONGENITAL STATIONARY, TYPE 2A	C16;C11	0.3	1995	0.57
disease	1.4921e-16		Congenital, Hereditary, and Neonatal Diseases and Abnormalities; Eye Diseases	1	Enzyme modulator	SAG	CURATED	6295	DTO_05007584	1995	0.731	C1864877	P10523	Disease or Syndrome	NIGHT BLINDNESS, CONGENITAL STATIONARY, TYPE 2B (disorder)	C16;C11	0.3	1995	0.57
disease	0.64329		Female Urogenital Diseases and Pregnancy Complications; Male Urogenital Diseases; Endocrine System Diseases	1	Transporter	ALB	CURATED	213	DTO_05007405	2006	0.962	C0017667	P02768	Disease or Syndrome	Nodular glomerulosclerosis	C13;C12;C19	0.31	2005	0.317
disease	0.15499		Female Urogenital Diseases and Pregnancy Complications; Male Urogenital Diseases; Endocrine System Diseases	1	Enzyme	SOD2	CURATED	6648	DTO_05007624	2014	0.923	C0017667	P04179	Disease or Syndrome	Nodular glomerulosclerosis	C13;C12;C19	0.3	2014	0.379
disease	3.2577e-06		Neoplasms; Immune System Diseases; Hemic and Lymphatic Diseases	1		UGT1A1	CURATED	54658		2009	0.769	C1334968	P22309	Neoplastic Process	Nodular Lymphocyte Predominant Hodgkin Lymphoma	C04;C20;C15	0.3	2009	0.464
disease	0.99985		Nervous System Diseases; Mental Disorders; Occupational Diseases	1	Nuclear receptor	RORC	CURATED	6097	DTO_00102000	2014	0.769	C0751759	P51449	Mental or Behavioral Dysfunction	Non-24 Hour Sleep-Wake Disorder	C10;F03;C24	0.3	2014	0.576
disease	0.00093892		Digestive System Diseases	1	Nuclear receptor	NR1H4	CURATED	9971	DTO_00102000	2019	0.808	C0400966	Q96RI1	Disease or Syndrome	Non-alcoholic Fatty Liver Disease	C06	0.4	2015	0.513
disease	9.841e-24		Digestive System Diseases	1		LDLR	CURATED	3949		2016	0.885	C0400966	P01130	Disease or Syndrome	Non-alcoholic Fatty Liver Disease	C06	0.37	2009	0.449
disease	0.65372		Digestive System Diseases	1	Kinase	JAK2	CURATED	3717	DTO_03300101	2019	0.885	C0400966	O60674	Disease or Syndrome	Non-alcoholic Fatty Liver Disease	C06	0.33	2017	0.385
disease	9.934e-07		Digestive System Diseases	1	Enzyme	ADH1B	CURATED	125	DTO_05007624	2018	0.846	C0400966	P00325	Disease or Syndrome	Non-alcoholic Fatty Liver Disease	C06	0.3	2018	0.502
disease	0.066228		Digestive System Diseases	1	Receptor	SCARB1	CURATED	949	DTO_05007575	2013	0.731	C0400966	Q8WTV0	Disease or Syndrome	Non-alcoholic Fatty Liver Disease	C06	0.3	2013	0.559
disease	0.030182		Digestive System Diseases	0.979	Nuclear receptor	PPARA	CURATED	5465	DTO_00102000	2020	0.885	C0400966	Q07869	Disease or Syndrome	Non-alcoholic Fatty Liver Disease	C06	0.4	2007	0.432
disease	0.26588		Digestive System Diseases	1	Signaling	STC2	CURATED	8614	DTO_05007599	2014	0.692	C0400966	O76061	Disease or Syndrome	Non-alcoholic Fatty Liver Disease	C06	0.3	2014	0.573
phenotype	0.0003636		Pathological Conditions, Signs and Symptoms; Nervous System Diseases	1	Enzyme	ALPL	CURATED	249	DTO_05007624	2016	0.769	C0751056	P05186	Sign or Symptom	Non-epileptic convulsion	C23;C10	0.3	1995	0.546
phenotype	0.0018685		Pathological Conditions, Signs and Symptoms; Nervous System Diseases	1		APOE	CURATED	348		2013	0.962	C0751056	P02649	Sign or Symptom	Non-epileptic convulsion	C23;C10	0.3	2013	0.338
phenotype	0.0184		Pathological Conditions, Signs and Symptoms; Nervous System Diseases	1	Signaling	FGF2	CURATED	2247	DTO_05007599	2011	0.923	C0751056	P09038	Sign or Symptom	Non-epileptic convulsion	C23;C10	0.3	2011	0.383
phenotype	0.15499		Pathological Conditions, Signs and Symptoms; Nervous System Diseases	1	Enzyme	SOD2	CURATED	6648	DTO_05007624	2010	0.923	C0751056	P04179	Sign or Symptom	Non-epileptic convulsion	C23;C10	0.3	2010	0.379
disease	0.15499		Neoplasms; Respiratory Tract Diseases	1	Enzyme	SOD2	CURATED	6648	DTO_05007624	2019	0.923	C0007131	P04179	Neoplastic Process	Non-Small Cell Lung Carcinoma	C04;C08	0.33	2001	0.379
disease	9.841e-24		Digestive System Diseases	1		LDLR	CURATED	3949		2020	0.885	C3241937	P01130	Disease or Syndrome	Nonalcoholic Steatohepatitis	C06	0.32	2010	0.449
disease	0.00093892		Digestive System Diseases	1	Nuclear receptor	NR1H4	CURATED	9971	DTO_00102000	2018	0.808	C3241937	Q96RI1	Disease or Syndrome	Nonalcoholic Steatohepatitis	C06	0.32	2013	0.513
disease	9.934e-07		Digestive System Diseases	1	Enzyme	ADH1B	CURATED	125	DTO_05007624	2018	0.846	C3241937	P00325	Disease or Syndrome	Nonalcoholic Steatohepatitis	C06	0.31	2016	0.502
disease	0.066228		Digestive System Diseases	1	Receptor	SCARB1	CURATED	949	DTO_05007575	2013	0.731	C3241937	Q8WTV0	Disease or Syndrome	Nonalcoholic Steatohepatitis	C06	0.3	2013	0.559
disease	0.65372		Digestive System Diseases	1	Kinase	JAK2	CURATED	3717	DTO_03300101	2017	0.885	C3241937	O60674	Disease or Syndrome	Nonalcoholic Steatohepatitis	C06	0.3	2017	0.385
disease	0.030182		Digestive System Diseases	1	Nuclear receptor	PPARA	CURATED	5465	DTO_00102000	2019	0.885	C3241937	Q07869	Disease or Syndrome	Nonalcoholic Steatohepatitis	C06	0.39	2005	0.432
disease	0.26588		Digestive System Diseases	1	Signaling	STC2	CURATED	8614	DTO_05007599	2014	0.692	C3241937	O76061	Disease or Syndrome	Nonalcoholic Steatohepatitis	C06	0.3	2014	0.573
phenotype	0.0003636		Pathological Conditions, Signs and Symptoms; Nervous System Diseases	1	Enzyme	ALPL	CURATED	249	DTO_05007624	2016	0.769	C3495874	P05186	Disease or Syndrome	Nonepileptic Seizures	C23;C10	0.3	1995	0.546
phenotype	0.0018685		Pathological Conditions, Signs and Symptoms; Nervous System Diseases	1		APOE	CURATED	348		2013	0.962	C3495874	P02649	Disease or Syndrome	Nonepileptic Seizures	C23;C10	0.3	2013	0.338
phenotype	0.0184		Pathological Conditions, Signs and Symptoms; Nervous System Diseases	1	Signaling	FGF2	CURATED	2247	DTO_05007599	2011	0.923	C3495874	P09038	Disease or Syndrome	Nonepileptic Seizures	C23;C10	0.3	2011	0.383
phenotype	0.15499		Pathological Conditions, Signs and Symptoms; Nervous System Diseases	1	Enzyme	SOD2	CURATED	6648	DTO_05007624	2010	0.923	C3495874	P04179	Disease or Syndrome	Nonepileptic Seizures	C23;C10	0.3	2010	0.379
disease	0.99985		Nervous System Diseases; Mental Disorders; Occupational Diseases	1	Nuclear receptor	RORC	CURATED	6097	DTO_00102000	2014	0.769	C0494410	P51449	Mental or Behavioral Dysfunction	Nonorganic Sleep Wake Cycle Disorders	C10;F03;C24	0.3	2014	0.576
disease	0.030057		Pathological Conditions, Signs and Symptoms; Nutritional and Metabolic Diseases	1	Signaling	GH1	CURATED	2688	DTO_05007599	2019	0.923	C0028754	P01241	Disease or Syndrome	Obesity	C23;C18	0.4	1982	0.373
disease	9.841e-24		Pathological Conditions, Signs and Symptoms; Nutritional and Metabolic Diseases	1		LDLR	CURATED	3949		2018	0.885	C0028754	P01130	Disease or Syndrome	Obesity	C23;C18	0.4	1992	0.449
disease	7.2668e-09		Pathological Conditions, Signs and Symptoms; Nutritional and Metabolic Diseases	1	Nuclear receptor	NR1I2	CURATED	8856	DTO_00102000	2018	0.846	C0028754	O75469	Disease or Syndrome	Obesity	C23;C18	0.35	2010	0.418
disease	1.4614e-22		Pathological Conditions, Signs and Symptoms; Nutritional and Metabolic Diseases	1	Transporter	SLC22A1	CURATED	6580	DTO_05007405	2017	0.731	C0028754	O15245	Disease or Syndrome	Obesity	C23;C18	0.32	2010	0.556
disease	9.934e-07		Pathological Conditions, Signs and Symptoms; Nutritional and Metabolic Diseases	1	Enzyme	ADH1B	CURATED	125	DTO_05007624	2015	0.846	C0028754	P00325	Disease or Syndrome	Obesity	C23;C18	0.31	2011	0.502
disease	0.030182		Pathological Conditions, Signs and Symptoms; Nutritional and Metabolic Diseases	0.881	Nuclear receptor	PPARA	CURATED	5465	DTO_00102000	2019	0.885	C0028754	Q07869	Disease or Syndrome	Obesity	C23;C18	0.4	1997	0.432
disease	7.7723e-10		Pathological Conditions, Signs and Symptoms; Nutritional and Metabolic Diseases	1	Transporter	SLC22A3	CURATED	6581	DTO_05007405	2016	0.846	C0028754	O75751	Disease or Syndrome	Obesity	C23;C18	0.3	2016	0.531
disease	2.0202e-12		Pathological Conditions, Signs and Symptoms; Nutritional and Metabolic Diseases	1	Transporter	SLC22A2	CURATED	6582	DTO_05007405	2016	0.769	C0028754	O15244	Disease or Syndrome	Obesity	C23;C18	0.3	2016	0.572
disease	0.00091697		Pathological Conditions, Signs and Symptoms; Congenital, Hereditary, and Neonatal Diseases and Abnormalities; Nutritional and Metabolic Diseases	1	G-protein coupled receptor	MC4R	CURATED	4160	DTO_02300001	2000	0.692	C4273958	P32245	Disease or Syndrome	Obesity due to melanocortin 4 receptor deficiency	C23;C16;C18	0.3	2000	0.535
disease	0.00091697		Pathological Conditions, Signs and Symptoms; Nutritional and Metabolic Diseases	0.977	G-protein coupled receptor	MC4R	CURATED	4160	DTO_02300001	2019	0.692	C0028756	P32245	Disease or Syndrome	Obesity, Morbid	C23;C18	0.4	1999	0.535
group	0.64329		Occupational Diseases	1	Transporter	ALB	CURATED	213	DTO_05007405	2013	0.962	C0028797	P02768	Disease or Syndrome	Occupational Diseases	C24	0.3	2013	0.317
disease	0.0039011		Neoplasms; Nervous System Diseases	1		CST3	CURATED	1471		2010	0.808	C1335107	P01034	Neoplastic Process	Olfactory Groove Meningioma	C04;C10	0.3	2010	0.436
phenotype	0.0003636		Pathological Conditions, Signs and Symptoms; Nervous System Diseases	1	Enzyme	ALPL	CURATED	249	DTO_05007624	2016	0.769	C0422853	P05186	Disease or Syndrome	Olfactory seizure	C23;C10	0.3	1995	0.546
phenotype	0.0018685		Pathological Conditions, Signs and Symptoms; Nervous System Diseases	1		APOE	CURATED	348		2013	0.962	C0422853	P02649	Disease or Syndrome	Olfactory seizure	C23;C10	0.3	2013	0.338
phenotype	0.0184		Pathological Conditions, Signs and Symptoms; Nervous System Diseases	1	Signaling	FGF2	CURATED	2247	DTO_05007599	2011	0.923	C0422853	P09038	Disease or Syndrome	Olfactory seizure	C23;C10	0.3	2011	0.383
phenotype	0.15499		Pathological Conditions, Signs and Symptoms; Nervous System Diseases	1	Enzyme	SOD2	CURATED	6648	DTO_05007624	2010	0.923	C0422853	P04179	Disease or Syndrome	Olfactory seizure	C23;C10	0.3	2010	0.379
disease	0.0184		Stomatognathic Diseases	1	Signaling	FGF2	CURATED	2247	DTO_05007599	2015	0.923	C0029172	P09038	Disease or Syndrome	Oral Submucous Fibrosis	C07	0.32	2006	0.383
disease	0.0039011		Stomatognathic Diseases	1		CST3	CURATED	1471		2006	0.808	C0029172	P01034	Disease or Syndrome	Oral Submucous Fibrosis	C07	0.31	2002	0.436
disease	7.7723e-10		Chemically-Induced Disorders; Mental Disorders	1	Transporter	SLC22A3	CURATED	6581	DTO_05007405	2006	0.846	C0029231	O75751	Mental or Behavioral Dysfunction	Organic Mental Disorders, Substance-Induced	C25;F03	0.3	2006	0.531
disease	0.96926		Congenital, Hereditary, and Neonatal Diseases and Abnormalities; Musculoskeletal Diseases; Stomatognathic Diseases	1		NECTIN2	CURATED	5819		2010	0.769	C1861537	Q92692	Disease or Syndrome	OROFACIAL CLEFT 1	C16;C05;C07	0.31	2009	0.575
disease	0.15499		Musculoskeletal Diseases	1	Enzyme	SOD2	CURATED	6648	DTO_05007624	2011	0.923	C0086743	P04179	Disease or Syndrome	Osteoarthrosis Deformans	C05	0.3	2004	0.379
disease	0.17989		Musculoskeletal Diseases	1	Cellular structure	EZR	CURATED	7430	DTO_05007530	2009	0.808	C0086743	P15311	Disease or Syndrome	Osteoarthrosis Deformans	C05	0.3	2009	0.476
disease	0.0003636		Nutritional and Metabolic Diseases; Musculoskeletal Diseases	1	Enzyme	ALPL	CURATED	249	DTO_05007624	2016	0.769	C0029453	P05186	Disease or Syndrome	Osteopenia	C18;C05	0.3	2016	0.546
disease	0.99999		Nutritional and Metabolic Diseases; Musculoskeletal Diseases	1		LRP2	CURATED	4036		1999	0.846	C0029453	P98164	Disease or Syndrome	Osteopenia	C18;C05	0.3	1999	0.491
disease	3.793e-10		Nutritional and Metabolic Diseases; Musculoskeletal Diseases	1		CYP2R1	CURATED	120227		2014	0.731	C0029453	Q6VVX0	Disease or Syndrome	Osteopenia	C18;C05	0.3	2014	0.563
disease	0.56616		Nutritional and Metabolic Diseases; Musculoskeletal Diseases	1	Signaling	FGB	CURATED	2244	DTO_05007599	2008	0.692	C0029456	P02675	Disease or Syndrome	Osteoporosis	C18;C05	0.3	2008	0.584
disease	0.99892		Nutritional and Metabolic Diseases; Musculoskeletal Diseases	1	Cellular structure	WDR1	CURATED	9948	DTO_05007530	2008	0.654	C0029456	O75083	Disease or Syndrome	Osteoporosis	C18;C05	0.3	2008	0.623
disease	0.56616		Nutritional and Metabolic Diseases; Musculoskeletal Diseases	1	Signaling	FGB	CURATED	2244	DTO_05007599	2008	0.692	C0001787	P02675	Disease or Syndrome	Osteoporosis, Age-Related	C18;C05	0.3	2008	0.584
disease	0.15499		Nutritional and Metabolic Diseases; Musculoskeletal Diseases	1	Enzyme	SOD2	CURATED	6648	DTO_05007624	2008	0.923	C0001787	P04179	Disease or Syndrome	Osteoporosis, Age-Related	C18;C05	0.3	2008	0.379
disease	0.99892		Nutritional and Metabolic Diseases; Musculoskeletal Diseases	1	Cellular structure	WDR1	CURATED	9948	DTO_05007530	2008	0.654	C0001787	O75083	Disease or Syndrome	Osteoporosis, Age-Related	C18;C05	0.3	2008	0.623
disease	0.56616		Nutritional and Metabolic Diseases; Musculoskeletal Diseases	1	Signaling	FGB	CURATED	2244	DTO_05007599	2008	0.692	C0029459	P02675	Disease or Syndrome	Osteoporosis, Senile	C18;C05	0.3	2008	0.584
disease	0.15499		Nutritional and Metabolic Diseases; Musculoskeletal Diseases	1	Enzyme	SOD2	CURATED	6648	DTO_05007624	2008	0.923	C0029459	P04179	Disease or Syndrome	Osteoporosis, Senile	C18;C05	0.3	2008	0.379
disease	0.99892		Nutritional and Metabolic Diseases; Musculoskeletal Diseases	1	Cellular structure	WDR1	CURATED	9948	DTO_05007530	2008	0.654	C0029459	O75083	Disease or Syndrome	Osteoporosis, Senile	C18;C05	0.3	2008	0.623
disease	7.2668e-09		Neoplasms	1	Nuclear receptor	NR1I2	CURATED	8856	DTO_00102000	2013	0.846	C0029463	O75469	Neoplastic Process	Osteosarcoma	C04	0.33	2007	0.418
disease	0.31397		Neoplasms; Female Urogenital Diseases and Pregnancy Complications; Endocrine System Diseases	1		IHH	CURATED	3549		2011	0.538	C0029927	Q14623	Disease or Syndrome	Ovarian Cysts	C04;C13;C19	0.3	2011	0.573
disease	0.15499		Neoplasms; Female Urogenital Diseases and Pregnancy Complications; Endocrine System Diseases	1	Enzyme	SOD2	CURATED	6648	DTO_05007624	2008	0.923	C0919267	P04179	Neoplastic Process	ovarian neoplasm	C04;C13;C19	0.33	2005	0.379
disease	0.96926		Neoplasms; Female Urogenital Diseases and Pregnancy Complications; Endocrine System Diseases	1		NECTIN2	CURATED	5819		2019	0.769	C0919267	Q92692	Neoplastic Process	ovarian neoplasm	C04;C13;C19	0.31	2013	0.575
disease	0.65372		Neoplasms	NA	Kinase	JAK2	CURATED	3717	DTO_03300101	NA	0.885	C1335177	O60674	Neoplastic Process	Ovarian Serous Adenocarcinoma	C04	0.3	NA	0.385
disease	1		Neoplasms	NA	Kinase	MAP3K4	CURATED	4216	DTO_03300101	NA	0.462	C1335177	Q9Y6R4	Neoplastic Process	Ovarian Serous Adenocarcinoma	C04	0.3	NA	0.729
disease	0.15499		Nutritional and Metabolic Diseases	1	Enzyme	SOD2	CURATED	6648	DTO_05007624	1999	0.923	C0949856	P04179	Disease or Syndrome	Oxidative Phosphorylation Deficiencies	C18	0.3	1999	0.379
disease	0.0036969		Nervous System Diseases	1		CRP	CURATED	1401		2003	0.962	C0030167	P02741	Disease or Syndrome	Pachymeningitis	C10	0.3	2003	0.299
phenotype	0.64329		Pathological Conditions, Signs and Symptoms	1	Transporter	ALB	CURATED	213	DTO_05007405	1973	0.962	C0234230	P02768	Sign or Symptom	Pain, Burning	C23	0.3	1973	0.317
phenotype	0.64329		Pathological Conditions, Signs and Symptoms	1	Transporter	ALB	CURATED	213	DTO_05007405	1973	0.962	C0458259	P02768	Sign or Symptom	Pain, Crushing	C23	0.3	1973	0.317
phenotype	0.64329		Pathological Conditions, Signs and Symptoms	1	Transporter	ALB	CURATED	213	DTO_05007405	1973	0.962	C0751407	P02768	Sign or Symptom	Pain, Migratory	C23	0.3	1973	0.317
phenotype	0.64329		Pathological Conditions, Signs and Symptoms	1	Transporter	ALB	CURATED	213	DTO_05007405	1973	0.962	C0458257	P02768	Sign or Symptom	Pain, Splitting	C23	0.3	1973	0.317
disease	0.15499		Digestive System Diseases; Neoplasms; Endocrine System Diseases	1	Enzyme	SOD2	CURATED	6648	DTO_05007624	2015	0.923	C0235974	P04179	Neoplastic Process	Pancreatic carcinoma	C06;C04;C19	0.37	2001	0.379
group	0.64329		Digestive System Diseases	1	Transporter	ALB	CURATED	213	DTO_05007405	2007	0.962	C0030286	P02768	Disease or Syndrome	Pancreatic Diseases	C06	0.3	2007	0.317
disease	0.15499		Digestive System Diseases; Neoplasms; Endocrine System Diseases	1	Enzyme	SOD2	CURATED	6648	DTO_05007624	2008	0.923	C0030297	P04179	Neoplastic Process	Pancreatic Neoplasm	C06;C04;C19	0.32	2003	0.379
disease	0.64329		Digestive System Diseases	1	Transporter	ALB	CURATED	213	DTO_05007405	2007	0.962	C0030305	P02768	Disease or Syndrome	Pancreatitis	C06	0.3	2007	0.317
disease	0.0039011		Neoplasms; Nervous System Diseases	1		CST3	CURATED	1471		2010	0.808	C3163622	P01034	Neoplastic Process	Papillary Meningioma	C04;C10	0.3	2010	0.436
disease	0.066228		Neoplasms; Female Urogenital Diseases and Pregnancy Complications; Male Urogenital Diseases	1	Receptor	SCARB1	CURATED	949	DTO_05007575	2011	0.731	C1306837	Q8WTV0	Neoplastic Process	Papillary Renal Cell Carcinoma	C04;C13;C12	0.3	2011	0.559
disease	0.15499		Neoplasms; Female Urogenital Diseases and Pregnancy Complications; Male Urogenital Diseases	1	Enzyme	SOD2	CURATED	6648	DTO_05007624	2004	0.923	C1306837	P04179	Neoplastic Process	Papillary Renal Cell Carcinoma	C04;C13;C12	0.3	2004	0.379
disease	0.15499		Neoplasms	1	Enzyme	SOD2	CURATED	6648	DTO_05007624	2011	0.923	C0030354	P04179	Neoplastic Process	Papilloma	C04	0.31	2001	0.379
disease	0.15499		Neoplasms	1	Enzyme	SOD2	CURATED	6648	DTO_05007624	2001	0.923	C0205874	P04179	Neoplastic Process	Papilloma, Squamous Cell	C04	0.3	2001	0.379
disease	0.15499		Neoplasms	1	Enzyme	SOD2	CURATED	6648	DTO_05007624	2001	0.923	C0205875	P04179	Neoplastic Process	Papillomatosis	C04	0.3	2001	0.379
disease	0.0039011		Neoplasms; Nervous System Diseases	1		CST3	CURATED	1471		2010	0.808	C0751304	P01034	Neoplastic Process	Parasagittal Meningioma	C04;C10	0.3	2010	0.436
disease	0.15499		Nervous System Diseases	1	Enzyme	SOD2	CURATED	6648	DTO_05007624	2019	0.923	C0030567	P04179	Disease or Syndrome	Parkinson Disease	C10	0.4	1997	0.379
disease	1		Nervous System Diseases	1	Receptor	IGF2R	CURATED	3482	DTO_05007575	2016	0.731	C0030567	P11717	Disease or Syndrome	Parkinson Disease	C10	0.32	2009	0.518
disease	0.56616		Nervous System Diseases	1	Signaling	FGB	CURATED	2244	DTO_05007599	2012	0.692	C0030567	P02675	Disease or Syndrome	Parkinson Disease	C10	0.3	2012	0.584
disease	0.96926		Nervous System Diseases	1		NECTIN2	CURATED	5819		2015	0.769	C0030567	Q92692	Disease or Syndrome	Parkinson Disease	C10	0.3	2015	0.575
disease	0.17259		Nervous System Diseases	1		TFAM	CURATED	7019		2018	0.731	C0751414	Q00059	Disease or Syndrome	Parkinson Disease, Secondary Vascular	C10	0.3	2018	0.529
disease	1.0376e-19		Pathological Conditions, Signs and Symptoms; Cardiovascular Diseases	1	Enzyme modulator	HSPG2	CURATED	3339	DTO_05007584	2018	0.885	C0235480	P98160	Disease or Syndrome	Paroxysmal atrial fibrillation	C23;C14	0.3	2018	0.438
disease	0.99892		Pathological Conditions, Signs and Symptoms; Cardiovascular Diseases	1	Cellular structure	WDR1	CURATED	9948	DTO_05007530	2018	0.654	C0235480	O75083	Disease or Syndrome	Paroxysmal atrial fibrillation	C23;C14	0.3	2018	0.623
disease	8.6107e-06		Pathological Conditions, Signs and Symptoms; Cardiovascular Diseases	1	Nucleic acid binding	SCMH1	CURATED	22955	DTO_05007557	2018	0.077	C0235480	Q96GD3	Disease or Syndrome	Paroxysmal atrial fibrillation	C23;C14	0.3	2018	0.931
group	0.0036969		Infections	1		CRP	CURATED	1401		2006	0.962	C0085397	P02741	Disease or Syndrome	Pasteurellaceae Infections	C01	0.3	2006	0.299
phenotype	0.0018685		Pathological Conditions, Signs and Symptoms	1		APOE	CURATED	348		2013	0.962	C0013990	P02649	Pathologic Function	Pathological accumulation of air in tissues	C23	0.3	2013	0.338
[truncated: 310 more rows]

## Sheet: Table 7
Supplementary table 7: Gprofiler results showing the role of significant genes on biological pathways
[truncated: 6,987 more rows]

[truncated: 2 more sheets: Table 8, Table 9]
